# Supplementary material for: Identification of small RNAs during cold acclimation in Arabidopsis thaliana
Source: BMC Plant Biol. 2020 Jun 29;20:298. doi: 10.1186/s12870-020-02511-3 (PMC7325139; doi:10.1186/s12870-020-02511-3)
Supplement: Supplementary file 4 — Additional file 4 Table S9: List of all mRNAs generated from mRNA sequencing data. The three sub-tables depict normalized read counts (triplicates) from control and cold treated samples at 3 h, 6 h and 2 d. Table S10: List of all significant DE mRNAs generated from mRNA sequencing data. The sub-tables present all the details from control and cold treated samples after 3 h, 6 h and 2 d. [file 12870_2020_2511_MOESM4_ESM.xlsx]

## Sheet: Table S9.
Table S9: List of all mRNAs generated from mRNA sequencing data. The three sub-tables depict normalized read counts (triplicates) from control and cold treated samples at 3 h, 6 h and 2 d
3 h
	Normalized read count
Gene	Control 3 h replicate 1	Control 3 h replicate 2	Control 3 h replicate 3	Cold 3 h replicate 1	Cold 3 h replicate 2	Cold 3 h replicate 3	log2FC	Standard error	wald statistics	p-value	q-value
AT5G24470	369.95	311.138	300.446	3534.2	2658.33	2620.73	3.13127	0.125333	-24.9837	9.18995e-138	1.82623e-133
AT4G25470	17.9008	28.7919	15.3843	1623.46	2736.43	2321.25	6.40658	0.273266	-23.4445	1.50383e-121	1.4942e-117
AT5G37260	9.5471	15.7891	12.6694	1360.04	820.553	1025.91	6.0139	0.26053	-23.0834	6.80465e-118	4.5074e-114
AT1G68050	120.532	110.524	84.161	1563.33	1090.62	1151.3	3.52912	0.164808	-21.4136	9.97836e-102	4.95725e-98
AT1G04570	9.5471	30.6495	19.9091	887.606	629.53	841.453	5.0146	0.250759	-19.9977	5.77191e-89	2.29399e-85
AT5G45340	17.9008	32.507	33.4834	940.099	1494.31	1066.32	5.1107	0.269556	-18.9597	3.67154e-80	1.21601e-76
AT3G55580	40.5752	34.3645	38.9132	858.974	523.197	753.37	4.08727	0.216839	-18.8494	2.97364e-79	8.44174e-76
AT1G70420	108.598	131.886	121.264	1375.31	1038.87	1099.49	3.20677	0.170823	-18.7724	1.26972e-78	3.15399e-75
AT2G46830	216.003	232.193	148.413	1482.21	1157.43	1250.78	2.66537	0.143824	-18.5321	1.13694e-76	2.51037e-73
AT5G48250	78.7636	76.1592	111.31	1477.43	860.075	1123.32	3.58567	0.194012	-18.4817	2.90032e-76	5.76352e-73
AT4G25480	44.1554	30.6495	25.3388	2103.53	2593.4	2382.39	5.74398	0.311847	-18.4193	9.2043e-76	1.6628e-72
AT4G33980	10.7405	13.9316	22.6239	822.706	511.905	621.763	5.00444	0.283064	-17.6796	6.02573e-70	9.9786e-67
AT4G18422	2.38678	0	2.71487	622.279	409.336	412.436	6.78134	0.387407	-17.5044	1.32536e-68	2.02596e-65
AT4G33920	122.919	165.321	121.264	989.728	1086.86	1209.33	2.94164	0.168261	-17.4826	1.94346e-68	2.7586e-65
AT5G15950	97.8578	79.8743	58.8222	777.848	664.347	813.474	3.1799	0.18194	-17.4777	2.11826e-68	2.80627e-65
AT3G07650	65.6363	44.581	50.6776	736.808	513.787	607.256	3.43397	0.199665	-17.1987	2.71785e-66	3.37557e-63
AT1G11210	34.6083	47.3673	19.9091	904.785	929.709	931.609	4.52779	0.265085	-17.0805	2.0735e-65	2.4238e-62
AT3G54500	652.783	690.077	573.743	1834.39	1617.58	1774.1	1.43661	0.0842123	-17.0594	2.97695e-65	3.28655e-62
AT4G25490	14.3207	9.28771	13.5744	570.74	548.604	952.334	5.42631	0.323192	-16.7898	2.90024e-63	3.03334e-60
AT4G32020	976.191	948.275	797.267	3006.41	3277.51	3236.28	1.79007	0.107779	-16.6086	6.0366e-62	5.99796e-59
AT2G16365	167.074	210.831	163.797	1614.87	1108.5	1148.19	2.77097	0.170784	-16.225	3.35918e-59	3.17874e-56
AT5G42900	15.514	22.2905	17.1942	902.877	401.808	446.633	4.62258	0.28762	-16.0718	4.01976e-58	3.63094e-55
AT5G47060	48.9289	58.5126	37.1032	864.7	540.135	601.038	3.64712	0.228792	-15.9407	3.30386e-57	2.85453e-54
AT4G38840	355.63	328.785	299.541	61.0826	29.171	37.3058	-2.87243	0.18425	15.5898	8.53879e-55	7.07012e-52
AT3G12320	199.296	176.467	134.839	969.686	849.724	955.443	2.40354	0.15615	-15.3925	1.83701e-53	1.46021e-50
AT1G47710	97.8578	124.455	105.88	669.999	444.153	552.333	2.29289	0.153817	-14.9066	2.98619e-50	2.28237e-47
AT1G18740	194.522	228.478	173.752	1061.31	1761.55	1436.27	2.76758	0.186324	-14.8536	6.5948e-50	4.85378e-47
AT4G36010	39.3818	80.8031	28.9586	1340	1337.16	1361.66	4.45433	0.300671	-14.8147	1.17795e-49	8.36006e-47
AT2G31380	268.512	253.555	161.082	1277.01	1045.45	1183.42	2.32119	0.1573	-14.7564	2.79756e-49	1.917e-46
AT5G61380	128.886	151.39	177.372	925.783	618.238	820.728	2.31212	0.159481	-14.4978	1.25147e-47	8.28975e-45
AT3G05800	105.018	110.524	99.5453	994.5	686.931	720.209	2.84206	0.198794	-14.2965	2.30045e-46	1.47466e-43
AT1G08890	119.339	163.464	126.694	897.15	793.264	655.96	2.45744	0.172915	-14.2118	7.7369e-46	4.80461e-43
AT4G06665	211.23	534.043	213.57	4344.5	3500.53	4190.69	3.4865	0.245731	-14.1883	1.08298e-45	6.52153e-43
AT1G75860	93.0843	144.888	98.6403	790.256	652.114	584.458	2.52169	0.179342	-14.0608	6.61388e-45	3.86562e-42
AT1G65490	35.8016	48.2961	22.6239	477.208	387.693	420.727	3.42756	0.244053	-14.0443	8.3486e-45	4.7401e-42
AT2G31360	971.418	899.979	742.065	3673.54	2806.07	2776.17	1.79925	0.128166	-14.0384	9.07156e-45	5.0075e-42
AT1G77120	35.8016	18.5754	17.1942	242.421	160.911	181.348	2.93042	0.214244	-13.678	1.37488e-42	7.38424e-40
AT4G17090	612.208	1395.01	480.532	10844.1	8508.53	10234.2	3.40778	0.251061	-13.5735	5.75063e-42	3.00728e-39
AT3G55980	142.013	100.307	91.4007	978.275	1971.4	1645.6	3.60387	0.266355	-13.5303	1.03577e-41	5.27767e-39
AT1G19370	131.273	117.954	112.215	437.122	367.932	378.239	1.69366	0.125586	-13.4861	1.88897e-41	9.3844e-39
AT1G23390	1232.77	970.566	1003.6	124.074	111.038	118.135	-3.07277	0.228557	13.4442	3.32856e-41	1.6133e-38
AT1G09070	354.436	465.314	304.971	1848.7	2460.72	2804.15	2.59291	0.193244	-13.4179	4.75284e-41	2.24877e-38
AT5G57110	219.583	367.793	240.719	1955.6	1169.66	1509.85	2.41544	0.184625	-13.083	4.12019e-39	1.9041e-36
AT1G01060	184.975	139.316	108.595	899.059	769.739	1049.74	2.58148	0.198631	-12.9964	1.28299e-38	5.79444e-36
AT1G70640	4.77355	5.57263	6.3347	582.193	343.465	523.318	5.40754	0.417362	-12.9565	2.15916e-38	9.53487e-36
AT1G78600	398.592	264.7	250.673	1507.98	1400.21	1258.03	2.14858	0.166094	-12.9359	2.82147e-38	1.21887e-35
AT3G30180	241.064	249.839	257.913	62.9914	73.3981	62.1763	-1.88872	0.147409	12.8128	1.39017e-37	5.87775e-35
AT1G22770	588.34	654.784	640.71	1588.15	1463.26	1357.52	1.21108	0.0959476	-12.6224	1.58993e-36	6.58231e-34
AT1G10410	130.079	185.754	128.504	851.338	715.161	814.51	2.35569	0.187101	-12.5905	2.38183e-36	9.65952e-34
AT1G74450	79.957	52.94	38.9132	457.165	683.167	710.883	3.27844	0.262813	-12.4744	1.02958e-35	4.09196e-33
AT4G27820	206.456	187.612	200.9	912.421	686.931	649.743	1.87952	0.154571	-12.1596	5.10168e-34	1.98786e-31
AT5G49480	184.975	217.332	91.4007	1452.62	1138.61	1588.61	2.95267	0.243392	-12.1313	7.20576e-34	2.75371e-31
AT3G17609	16.7074	13.9316	12.6694	156.524	114.802	121.244	3.01418	0.249712	-12.0706	1.50996e-33	5.66149e-31
AT5G17300	100.245	52.94	48.8677	879.016	504.377	613.473	3.14814	0.262432	-11.996	3.72832e-33	1.37202e-30
AT3G02380	175.428	102.165	107.69	502.977	429.097	417.618	1.792	0.151117	-11.8583	1.94808e-32	7.03858e-30
AT1G13260	295.96	336.215	252.483	1618.69	1985.51	1760.63	2.51572	0.212481	-11.8398	2.43144e-32	8.42201e-30
AT2G40130	50.1223	57.5838	40.7231	202.336	212.666	201.037	2.01009	0.169788	-11.8388	2.45811e-32	8.42201e-30
AT5G14550	101.438	111.453	92.3056	444.757	351.935	315.027	1.82776	0.154359	-11.8409	2.39771e-32	8.42201e-30
AT3G28340	28.6413	27.8631	19.9091	180.384	201.374	172.021	2.75475	0.237377	-11.6049	3.88929e-31	1.30996e-28
AT3G23170	96.6644	67.8003	118.549	555.47	846.901	751.298	2.80346	0.243418	-11.517	1.08267e-30	3.58581e-28
AT5G50450	66.8297	73.3729	105.88	499.159	397.103	335.752	2.24768	0.195511	-11.4964	1.37461e-30	4.47806e-28
AT2G36220	101.438	118.883	76.9214	457.165	460.15	562.696	2.25727	0.196452	-11.4902	1.47769e-30	4.73624e-28
AT1G80920	1170.71	1119.17	742.97	286.325	223.958	195.856	-2.05927	0.181023	11.3757	5.5243e-30	1.74252e-27
AT5G01100	25.0611	30.6495	19.9091	247.193	156.206	227.98	2.93442	0.258235	-11.3634	6.36384e-30	1.97597e-27
AT1G29690	82.3438	88.2333	77.8263	349.316	391.457	346.115	2.07908	0.183182	-11.3498	7.43384e-30	2.2727e-27
AT1G49720	201.683	217.332	190.946	1239.79	696.341	842.49	2.12581	0.188345	-11.2868	1.5244e-29	4.58983e-27
AT5G19240	120.532	86.3757	109.5	748.261	903.361	930.573	2.88449	0.257852	-11.1866	4.74218e-29	1.40652e-26
AT5G46710	59.6694	117.025	69.6817	794.073	394.28	663.214	2.76949	0.250015	-11.0773	1.61638e-28	4.72364e-26
AT2G22500	105.018	177.395	86.8759	556.424	640.822	704.665	2.2922	0.208675	-10.9846	4.53471e-28	1.306e-25
AT3G51920	263.739	209.902	153.843	800.754	717.984	722.282	1.80477	0.165286	-10.919	9.34807e-28	2.65378e-25
AT1G32900	167.074	177.395	119.454	469.572	762.211	597.929	1.93714	0.177453	-10.9164	9.62582e-28	2.69414e-25
AT3G60520	41.7686	48.2961	23.5289	231.923	205.138	205.182	2.41801	0.222201	-10.8821	1.40325e-27	3.87298e-25
AT2G16890	13.1273	13.0028	17.1942	135.527	121.389	119.171	2.93587	0.270176	-10.8665	1.66454e-27	4.53119e-25
AT1G64890	70.4099	100.307	64.252	388.447	263.48	321.244	1.99275	0.18346	-10.862	1.74828e-27	4.69483e-25
AT3G13310	102.631	81.7319	61.5371	468.618	452.622	393.784	2.34377	0.21656	-10.8227	2.68674e-27	7.11878e-25
AT2G40140	128.886	120.74	59.7272	589.828	483.675	696.375	2.43244	0.226059	-10.7602	5.30338e-27	1.3867e-24
AT3G59350	134.853	205.258	213.57	1280.82	1509.37	1466.33	2.79174	0.260273	-10.7262	7.66822e-27	1.979e-24
AT1G09950	4.77355	11.1453	4.52479	160.342	271.949	216.581	4.36363	0.408622	-10.6789	1.27762e-26	3.25498e-24
AT3G51238	33.4149	36.2221	31.6735	125.983	191.023	169.949	2.17991	0.204338	-10.6681	1.43474e-26	3.60902e-24
AT1G70780	442.747	360.363	371.032	990.683	1259.06	1013.47	1.45404	0.136544	-10.6489	1.76406e-26	4.38192e-24
AT4G18010	139.626	200.615	109.5	980.184	1171.55	666.323	2.53873	0.238599	-10.6402	1.93796e-26	4.75445e-24
AT3G46640	69.2165	83.5894	89.5908	528.746	345.347	353.369	2.25121	0.212542	-10.5918	3.25157e-26	7.87991e-24
AT1G27730	28.6413	63.1564	28.9586	443.803	611.651	564.769	3.46275	0.327158	-10.5844	3.5219e-26	8.43219e-24
AT3G56880	120.532	100.307	133.934	553.561	647.409	697.411	2.33581	0.220799	-10.5789	3.73269e-26	8.83049e-24
AT4G28240	280.446	264.7	223.524	56.3105	71.5161	40.4146	-2.12561	0.201152	10.5671	4.23216e-26	9.8943e-24
AT3G51240	33.4149	41.7947	31.6735	126.937	192.905	174.094	2.12421	0.202053	-10.5132	7.514e-26	1.73626e-23
AT1G76590	34.6083	77.088	61.5371	454.302	303.943	344.042	2.5377	0.242329	-10.4721	1.16019e-25	2.65003e-23
AT2G44130	378.304	253.555	197.281	30.5413	28.23	36.2695	-2.93906	0.281903	10.4258	1.89048e-25	4.26905e-23
AT4G34150	136.046	139.316	123.074	714.857	1029.46	1023.84	2.66609	0.256902	-10.3778	3.12759e-25	6.98331e-23
AT4G17615	71.6033	70.5866	57.9173	397.991	348.17	651.815	2.67884	0.258314	-10.3705	3.37832e-25	7.45933e-23
AT1G20030	59.6694	61.2989	47.9627	389.401	281.359	303.628	2.43914	0.236202	-10.3265	5.34936e-25	1.16816e-22
AT5G06980	288.8	317.64	265.152	797.891	817.73	805.184	1.44919	0.141601	-10.2343	1.39128e-24	3.00516e-22
AT4G32190	153.947	313.925	190.041	932.463	856.311	1040.42	2.03871	0.200406	-10.1729	2.61936e-24	5.59698e-22
AT1G12420	19.0942	25.0768	28.9586	143.162	191.023	132.643	2.53091	0.249118	-10.1595	3.00603e-24	6.35487e-22
AT2G27500	88.3107	114.239	58.8222	368.404	434.743	304.664	2.02752	0.199754	-10.1501	3.31123e-24	6.9264e-22
AT3G52400	76.3768	63.1564	55.2024	428.532	287.005	347.151	2.36152	0.234446	-10.0727	7.29173e-24	1.50939e-21
AT1G69572	66.8297	47.3673	67.8718	275.826	276.654	208.291	2.00256	0.199184	-10.0538	8.84114e-24	1.81125e-21
AT1G77760	467.808	689.148	437.999	2463.35	1690.98	2224.88	1.94214	0.195811	-9.91846	3.46048e-23	7.017e-21
AT4G31550	126.499	128.17	119.454	383.675	497.79	383.421	1.72002	0.173652	-9.90497	3.96088e-23	7.95057e-21
AT4G19960	107.405	113.31	88.6858	363.632	519.433	476.685	2.07038	0.209903	-9.86349	5.99311e-23	1.19095e-20
AT4G30350	119.339	226.62	134.839	576.467	556.132	697.411	1.87188	0.190686	-9.81656	9.55509e-23	1.87999e-20
AT1G71950	122.919	99.3785	88.6858	312.094	281.359	332.643	1.55076	0.158485	-9.7849	1.30728e-22	2.54689e-20
AT2G35650	131.273	129.099	104.07	335	415.923	317.099	1.52642	0.15631	-9.76532	1.58614e-22	3.06017e-20
AT2G08780	73.9901	67.8003	34.3884	274.872	275.713	364.768	2.30012	0.236204	-9.73784	2.07924e-22	3.97295e-20
AT3G50260	8.35372	12.074	5.42974	191.837	87.5131	159.586	3.67047	0.377585	-9.72091	2.45574e-22	4.64767e-20
AT4G24240	42.962	25.0768	43.4379	237.649	184.436	174.094	2.32097	0.23932	-9.69817	3.06951e-22	5.75445e-20
AT1G64760	64.443	74.3017	89.5908	251.011	223.958	249.742	1.61692	0.166856	-9.69049	3.3094e-22	6.14621e-20
AT1G69570	90.6975	63.1564	88.6858	368.404	356.64	243.524	1.93794	0.200142	-9.68283	3.56703e-22	6.50312e-20
AT2G19450	75.1834	65.014	73.3015	424.715	264.421	244.56	2.05339	0.212045	-9.68376	3.53483e-22	6.50312e-20
AT1G02660	103.825	161.606	124.884	539.244	653.055	873.578	2.30793	0.239061	-9.65413	4.72134e-22	8.52931e-20
AT2G03750	269.706	251.697	251.578	82.0797	95.0411	71.5028	-1.60711	0.166615	9.64564	5.12921e-22	9.18268e-20
AT5G67420	484.516	347.36	428.045	98.3047	121.389	94.3008	-1.95094	0.202963	9.61229	7.09554e-22	1.25895e-19
AT1G61340	10.7405	23.2193	12.6694	210.926	123.271	273.576	3.38546	0.352305	-9.60945	7.29398e-22	1.28271e-19
AT4G33070	5.96694	2.78631	12.6694	92.5783	66.8111	73.5753	3.06812	0.319471	-9.60376	7.70783e-22	1.3436e-19
AT1G51610	264.932	217.332	213.57	844.657	502.495	636.271	1.48307	0.154592	-9.59343	8.52012e-22	1.47228e-19
AT3G49530	110.985	87.3045	87.7808	294.914	341.583	338.861	1.73396	0.180963	-9.58187	9.53001e-22	1.63259e-19
AT3G14050	305.507	268.415	199.091	983.047	672.816	893.267	1.68466	0.176631	-9.53773	1.45998e-21	2.47972e-19
AT1G79660	81.1504	88.2333	76.9214	424.715	320.881	332.643	2.05377	0.215417	-9.5339	1.51482e-21	2.54678e-19
AT2G24600	33.4149	39.9372	42.533	218.561	173.144	212.436	2.28386	0.239569	-9.5332	1.52509e-21	2.54678e-19
AT2G15050	466.615	452.312	495.916	214.743	194.787	176.166	-1.26303	0.132694	9.51838	1.75902e-21	2.91294e-19
AT1G07587	33.4149	37.1509	52.4875	342.635	176.908	225.907	2.45544	0.262668	-9.34809	8.92416e-21	1.46563e-18
AT2G26080	1689.84	1729.37	1483.22	3066.54	3480.76	3604.16	1.03856	0.111385	-9.32412	1.11905e-20	1.82277e-18
AT2G21320	48.9289	40.8659	58.8222	293.96	182.554	283.939	2.24107	0.240484	-9.319	1.17443e-20	1.89741e-18
AT4G35090	2760.31	2182.61	2082.31	5036.45	6644.41	5730.59	1.28945	0.138923	-9.28173	1.66743e-20	2.67219e-18
AT1G27770	226.744	250.768	155.653	666.182	790.441	655.96	1.6982	0.183055	-9.27699	1.74341e-20	2.7716e-18
AT5G15845	131.273	111.453	99.5453	359.814	373.578	293.265	1.55478	0.167991	-9.25517	2.13887e-20	3.3733e-18
AT1G55960	147.98	147.675	126.694	408.49	443.212	500.52	1.64103	0.177462	-9.24724	2.30367e-20	3.60462e-18
AT5G43260	62.0562	70.5866	64.252	203.29	274.772	238.343	1.80578	0.195438	-9.23966	2.47286e-20	3.83911e-18
AT2G22840	94.2777	94.7347	95.0205	308.276	303.002	226.944	1.52797	0.165882	-9.21122	3.22445e-20	4.96715e-18
AT2G43290	138.433	117.025	110.405	330.228	597.536	441.452	1.85267	0.201448	-9.19674	3.68986e-20	5.64038e-18
AT4G29190	397.398	377.081	260.628	1328.55	1244.94	1165.81	1.80227	0.196244	-9.18384	4.15997e-20	6.31045e-18
AT1G07135	3.58016	8.35894	9.95453	97.3503	127.035	97.4096	3.43768	0.377215	-9.11331	7.99085e-20	1.20299e-17
AT1G69890	106.212	57.5838	57.0123	275.826	230.545	264.249	1.77387	0.194759	-9.10805	8.38792e-20	1.25327e-17
AT5G65300	3.58016	13.9316	8.14461	107.849	83.7491	111.917	3.2098	0.352685	-9.10103	8.94791e-20	1.32696e-17
AT3G02370	75.1834	58.5126	54.2974	234.786	174.085	174.094	1.60225	0.176448	-9.08055	1.08024e-19	1.59012e-17
AT3G20600	47.7355	21.3617	25.3388	209.971	167.498	227.98	2.5557	0.282424	-9.04917	1.44059e-19	2.10496e-17
AT1G53035	27.4479	45.5098	31.6735	307.322	127.035	216.581	2.47397	0.274133	-9.02471	1.80177e-19	2.61348e-17
AT2G44490	798.377	598.129	623.515	1752.31	1624.17	1481.87	1.24564	0.138122	-9.01842	1.90829e-19	2.74794e-17
AT3G26510	149.174	150.461	202.71	22.906	20.702	23.8343	-2.71332	0.300896	9.01746	1.92496e-19	2.752e-17
AT1G08477	192.135	180.182	165.607	381.766	387.693	431.089	1.1433	0.12709	-8.99599	2.34115e-19	3.3231e-17
AT4G11600	354.436	361.292	278.727	943.916	720.807	933.682	1.36078	0.151406	-8.98762	2.52651e-19	3.56077e-17
AT4G24570	35.8016	33.4358	34.3884	215.698	396.162	354.405	2.9771	0.331674	-8.976	2.80799e-19	3.92961e-17
AT3G11020	16.7074	20.433	21.719	164.159	96.9231	99.4822	2.4619	0.274423	-8.97119	2.93319e-19	4.07612e-17
AT3G03535	108.598	175.538	101.355	469.572	526.961	758.551	2.10169	0.234414	-8.96574	3.08192e-19	4.25305e-17
AT5G43620	25.0611	28.7919	19.0041	106.894	105.392	111.917	2.08173	0.232983	-8.93513	4.06698e-19	5.57373e-17
AT4G07905	10.7405	8.35894	10.8595	111.667	80.9261	95.3371	2.97798	0.33356	-8.92787	4.34292e-19	5.91113e-17
AT1G56300	206.456	202.472	196.376	660.455	428.156	462.178	1.33104	0.14988	-8.88074	6.6417e-19	8.97849e-17
AT1G76650	21.481	46.4386	14.4793	337.863	425.333	455.96	3.47944	0.392739	-8.85944	8.04197e-19	1.0798e-16
AT3G61460	187.362	177.395	311.305	48.6752	58.3421	44.5597	-2.08088	0.235135	8.84973	8.77329e-19	1.17009e-16
AT1G02820	14.3207	35.2933	18.0991	260.555	298.297	295.338	3.23678	0.366146	-8.84014	9.55991e-19	1.2665e-16
AT5G15850	127.693	121.669	100.45	365.541	373.578	293.265	1.52756	0.172842	-8.83788	9.75497e-19	1.28378e-16
AT3G59940	1300.79	1198.11	740.255	179.43	212.666	249.742	-2.22715	0.252021	8.83714	9.8197e-19	1.2838e-16
AT5G63320	189.749	221.048	200.9	588.874	505.318	476.685	1.33141	0.150957	-8.81979	1.14673e-18	1.4894e-16
AT2G18890	147.98	147.675	113.12	312.094	283.241	301.555	1.12164	0.127235	-8.81551	1.19141e-18	1.53738e-16
AT2G46790	137.24	139.316	95.0205	537.336	393.339	510.882	1.8931	0.214845	-8.81147	1.23512e-18	1.5835e-16
AT1G78070	329.375	443.024	213.57	1410.63	1232.71	1749.23	2.07176	0.235311	-8.80435	1.31615e-18	1.67657e-16
AT2G35960	158.721	154.176	139.363	328.319	301.12	271.503	0.983654	0.111915	-8.78927	1.50538e-18	1.90541e-16
AT5G46690	128.886	153.247	256.103	24.8148	30.112	33.1607	-2.47357	0.281906	8.77445	1.71745e-18	2.16007e-16
AT5G14760	44.1554	27.8631	34.3884	159.387	155.265	203.109	2.1757	0.248537	-8.75405	2.05824e-18	2.57241e-16
AT4G13575	751.834	912.982	893.193	399.9	316.176	346.115	-1.25821	0.14402	8.73632	2.40829e-18	2.99109e-16
AT4G22780	88.3107	68.7291	73.3015	344.544	235.25	294.301	1.86508	0.214124	-8.71026	3.03168e-18	3.74196e-16
AT3G08405	87.1173	78.0168	56.1073	210.926	195.728	249.742	1.54492	0.177451	-8.70619	3.14249e-18	3.85479e-16
AT3G09275	1219.64	1088.52	672.383	166.068	197.61	237.306	-2.20207	0.253014	8.70337	3.22183e-18	3.90392e-16
AT4G35320	105.018	116.096	72.3966	308.276	364.168	254.923	1.61965	0.186084	-8.70384	3.20851e-18	3.90392e-16
AT5G45610	48.9289	65.014	51.5826	206.154	174.085	161.659	1.65768	0.19058	-8.69812	3.37421e-18	4.06377e-16
AT5G66210	112.178	97.521	112.215	375.085	698.223	557.515	2.23066	0.256801	-8.68634	3.743e-18	4.48077e-16
AT2G23810	325.795	184.825	147.508	819.842	1161.2	1071.51	2.12561	0.244733	-8.68543	3.77308e-18	4.48974e-16
AT2G02100	522.704	526.613	228.954	1591.01	1540.42	1745.08	1.87008	0.215606	-8.6736	4.18684e-18	4.95244e-16
AT2G02800	150.367	130.957	120.359	310.185	304.884	291.193	1.16108	0.134156	-8.65467	4.94333e-18	5.81265e-16
AT2G44940	157.527	175.538	113.12	733.945	562.719	437.307	1.88813	0.218447	-8.64344	5.45431e-18	6.37577e-16
AT2G06615	17.9008	12.074	5.42974	110.712	89.3951	94.3008	2.83244	0.327845	-8.63957	5.64237e-18	6.55702e-16
AT1G60190	19.0942	32.507	14.4793	291.097	207.02	435.234	3.38083	0.391537	-8.63476	5.88514e-18	6.79939e-16
AT4G29780	32.2215	52.94	27.1487	168.931	280.418	287.047	2.56113	0.296999	-8.62338	6.50081e-18	7.46728e-16
AT1G80840	33.4149	44.581	16.2892	244.33	191.023	304.664	2.77825	0.322631	-8.61122	7.2286e-18	8.25556e-16
AT4G17490	11.9339	5.57263	16.2892	110.712	152.442	156.477	3.28637	0.382021	-8.60259	7.79356e-18	8.84992e-16
AT4G02330	51.3157	27.8631	38.0082	232.877	350.994	277.721	2.68223	0.313075	-8.56738	1.0587e-17	1.19537e-15
AT4G27950	25.0611	49.2249	38.0082	192.792	149.619	196.892	2.14656	0.251135	-8.54742	1.25872e-17	1.41318e-15
AT4G38580	93.0843	121.669	76.0164	323.547	266.303	303.628	1.57611	0.184875	-8.5253	1.52409e-17	1.7015e-15
AT2G16700	66.8297	78.9456	35.2933	229.06	201.374	226.944	1.80431	0.212808	-8.47862	2.27873e-17	2.52977e-15
AT3G57530	150.367	148.603	139.363	406.581	867.603	636.271	2.03765	0.240411	-8.47569	2.33681e-17	2.57984e-15
AT1G49230	38.1884	33.4358	57.0123	177.521	173.144	146.114	1.8723	0.22114	-8.46661	2.52639e-17	2.77373e-15
AT1G63860	65.6363	80.8031	91.4007	251.966	367.932	291.193	1.86459	0.220397	-8.46014	2.67056e-17	2.9159e-15
AT1G76360	190.942	168.108	158.367	573.603	518.492	471.504	1.55533	0.184209	-8.44331	3.08469e-17	3.34967e-15
AT2G20670	217.197	336.215	385.512	32.4501	24.466	25.9068	-3.14187	0.373201	8.41872	3.8061e-17	4.11059e-15
AT1G07050	42.962	88.2333	79.6362	406.581	215.489	304.664	2.02609	0.240781	-8.41464	3.94115e-17	4.23343e-15
AT1G07420	150.367	122.598	146.603	310.185	354.758	284.975	1.16293	0.138249	-8.41182	4.03692e-17	4.31299e-15
AT5G42050	426.04	411.446	360.173	1252.19	1323.05	1355.44	1.66474	0.198262	-8.39666	4.59362e-17	4.88152e-15
AT5G04720	116.952	98.4498	74.2065	270.099	398.044	309.845	1.71127	0.204156	-8.38218	5.19577e-17	5.49204e-15
AT4G36540	455.874	383.583	508.586	181.339	111.038	155.441	-1.56169	0.186354	8.38019	5.28424e-17	5.556e-15
AT4G38860	570.439	404.944	363.793	160.342	98.8051	97.4096	-1.84615	0.221264	8.34366	7.20281e-17	7.53338e-15
AT3G56290	126.499	87.3045	105.88	328.319	295.474	337.825	1.54918	0.186638	-8.30045	1.03715e-16	1.07907e-14
AT1G49225	42.962	30.6495	63.347	200.427	194.787	174.094	1.96113	0.239996	-8.17149	3.04611e-16	3.15272e-14
AT1G01140	310.281	372.437	246.148	763.532	757.506	871.505	1.33848	0.164298	-8.14666	3.74129e-16	3.85217e-14
AT1G28050	50.1223	81.7319	61.5371	214.743	174.085	184.457	1.51333	0.186162	-8.12908	4.32552e-16	4.43076e-14
AT3G27880	40.5752	43.6522	29.8636	144.117	122.33	138.861	1.76869	0.21777	-8.12183	4.59205e-16	4.67965e-14
AT3G46620	34.6083	58.5126	38.9132	136.481	216.43	188.602	1.94371	0.240047	-8.09719	5.62441e-16	5.68129e-14
AT5G24590	106.212	114.239	85.066	334.045	352.876	493.266	1.87806	0.231945	-8.09702	5.63211e-16	5.68129e-14
AT5G17050	65.6363	58.5126	30.7685	211.88	161.852	198.964	1.82143	0.224975	-8.09614	5.67314e-16	5.69377e-14
AT4G32280	130.079	147.675	192.756	30.5413	15.997	18.6529	-2.64116	0.326601	8.0868	6.12523e-16	6.11662e-14
AT3G44630	247.031	246.124	202.71	458.119	555.191	456.996	1.0658	0.131848	-8.08357	6.28962e-16	6.24936e-14
AT1G67970	46.5421	44.581	36.1983	199.473	112.92	159.586	1.82969	0.226436	-8.08037	6.45703e-16	6.38379e-14
AT3G21890	10.7405	1.85754	4.52479	96.3959	81.8671	102.591	3.44888	0.431238	-7.99762	1.26851e-15	1.24791e-13
AT3G61580	1546.63	1501.82	1333	3146.71	3448.77	2983.43	1.10929	0.139223	-7.9677	1.61649e-15	1.5824e-13
AT5G03555	99.0512	83.5894	87.7808	251.966	202.315	252.85	1.35677	0.17035	-7.9646	1.65765e-15	1.61475e-13
AT1G14720	257.772	175.538	258.818	644.23	584.362	461.141	1.25948	0.158391	-7.95169	1.83987e-15	1.7835e-13
AT1G11960	65.6363	152.318	66.0619	422.806	449.799	811.401	2.40033	0.302086	-7.94584	1.92885e-15	1.86069e-13
AT5G54470	17.9008	17.6467	22.6239	98.3047	167.498	162.695	2.64888	0.333421	-7.94454	1.94913e-15	1.87116e-13
AT5G18020	83.5372	85.447	126.694	20.9971	16.938	16.5804	-2.30257	0.290929	7.91455	2.48139e-15	2.37069e-13
AT1G12710	85.9239	69.6578	69.6817	232.877	239.955	173.058	1.48525	0.187702	-7.91282	2.51633e-15	2.39256e-13
AT2G30990	184.975	172.751	170.132	396.082	384.87	375.131	1.11262	0.140791	-7.90263	2.73085e-15	2.58417e-13
AT3G52800	151.56	128.17	114.93	476.253	833.727	675.65	2.20318	0.278963	-7.89773	2.84019e-15	2.67489e-13
AT3G53800	310.281	311.138	284.157	125.983	122.33	100.518	-1.35355	0.171441	7.89514	2.89999e-15	2.71833e-13
AT4G18280	34.6083	103.094	33.4834	325.456	335.937	387.566	2.43381	0.308681	-7.88454	3.15704e-15	2.94538e-13
AT4G02380	108.598	40.8659	30.7685	385.584	326.527	248.705	2.27755	0.289238	-7.87431	3.42639e-15	3.18174e-13
AT4G20890	478.549	422.591	412.66	988.774	893.01	823.837	1.02538	0.13029	-7.86998	3.54691e-15	3.27834e-13
AT4G04330	367.564	353.862	357.458	977.321	616.356	743.007	1.09323	0.139006	-7.86463	3.70179e-15	3.40565e-13
AT3G17800	315.054	566.55	266.962	1396.31	1427.5	2166.85	2.02253	0.257246	-7.86222	3.77373e-15	3.45583e-13
AT3G08170	243.451	290.705	171.037	712.948	641.763	550.261	1.39994	0.17821	-7.85557	3.97962e-15	3.62766e-13
AT5G10750	79.957	61.2989	43.4379	272.963	446.035	372.022	2.40081	0.306233	-7.83981	4.51223e-15	4.09438e-13
AT2G30020	47.7355	66.8715	52.4875	149.843	200.433	232.125	1.73739	0.221856	-7.83116	4.83376e-15	4.36621e-13
AT1G67470	16.7074	17.6467	19.0041	69.6723	83.7491	80.8293	2.02078	0.258247	-7.82497	5.07784e-15	4.56592e-13
AT5G46700	72.7967	80.8031	67.8718	268.191	166.557	233.161	1.54144	0.197056	-7.82234	5.18497e-15	4.64125e-13
AT1G19020	19.0942	22.2905	15.3843	125.983	73.3981	117.099	2.33603	0.299609	-7.79694	6.3427e-15	5.65212e-13
AT5G65630	274.479	237.765	238.004	477.208	588.126	478.758	1.02767	0.132063	-7.78169	7.156e-15	6.3484e-13
AT3G26740	1755.47	1970.85	3132.06	944.871	729.276	671.505	-1.51992	0.195501	7.77452	7.57359e-15	6.689e-13
AT5G63160	115.759	204.33	209.045	1032.68	909.948	759.588	2.20405	0.28373	-7.76812	7.96595e-15	7.0044e-13
AT3G15210	162.301	238.694	105.88	1015.5	591.89	829.018	2.14015	0.275853	-7.75831	8.60709e-15	7.53481e-13
AT4G37760	276.866	387.298	251.578	766.395	777.267	796.894	1.32221	0.170862	-7.73845	1.00636e-14	8.77121e-13
AT4G20170	87.1173	78.9456	89.5908	264.373	295.474	192.747	1.51026	0.195361	-7.73062	1.07027e-14	9.28753e-13
AT1G62180	424.846	393.799	313.115	779.757	823.376	822.8	1.08433	0.140284	-7.72954	1.07935e-14	9.32561e-13
AT1G49450	5.96694	11.1453	11.7644	77.3076	74.3391	81.8655	2.70741	0.350949	-7.71452	1.21439e-14	1.04469e-12
AT4G00970	91.8909	55.7263	74.2065	271.054	200.433	213.472	1.58406	0.205658	-7.70241	1.33526e-14	1.14372e-12
AT2G41100	421.266	343.645	272.392	1316.14	1071.8	979.278	1.6425	0.213494	-7.69345	1.43223e-14	1.22152e-12
AT5G52570	58.476	73.3729	36.1983	224.288	182.554	173.058	1.72596	0.224784	-7.67831	1.61195e-14	1.36892e-12
AT2G30250	96.6644	78.0168	74.2065	378.903	228.663	224.871	1.68265	0.219177	-7.67712	1.62706e-14	1.37587e-12
AT5G59820	9.5471	15.7891	6.3347	71.5811	76.2211	64.2489	2.52477	0.329949	-7.65201	1.97864e-14	1.66609e-12
AT2G41105	294.767	210.831	212.665	826.523	737.745	686.012	1.59655	0.208962	-7.64038	2.16585e-14	1.81602e-12
AT5G03230	125.306	104.022	81.4461	20.9971	20.702	25.9068	-2.09587	0.274868	7.62502	2.43999e-14	2.03729e-12
AT3G50950	301.927	351.076	199.996	850.384	737.745	662.178	1.36656	0.17938	-7.61823	2.57173e-14	2.1383e-12
AT5G51460	87.1173	81.7319	83.2561	272.008	297.356	186.529	1.53313	0.201695	-7.60122	2.93357e-14	2.429e-12
AT1G33230	126.499	157.891	155.653	357.906	296.415	366.84	1.18152	0.155455	-7.6004	2.95221e-14	2.43429e-12
AT1G25550	256.578	245.196	258.818	506.794	654.937	654.924	1.22971	0.161983	-7.5916	3.15977e-14	2.59467e-12
AT5G20830	136.046	104.022	51.5826	707.222	366.05	451.815	2.22256	0.293192	-7.58056	3.44071e-14	2.81374e-12
AT3G09600	48.9289	36.2221	30.7685	198.518	167.498	158.55	2.06681	0.272955	-7.57199	3.67546e-14	2.99339e-12
AT1G28370	8.35372	8.35894	9.95453	125.983	68.6931	139.897	3.21368	0.424564	-7.56938	3.75023e-14	3.04182e-12
AT5G17460	62.0562	156.034	32.5785	1781.89	940.06	1088.09	3.30068	0.436763	-7.55714	4.12032e-14	3.32842e-12
AT5G17850	15.514	50.1536	21.719	116.439	161.852	208.291	2.29491	0.303964	-7.54995	4.35409e-14	3.50301e-12
AT1G30282	84.7306	45.5098	69.6817	305.413	227.722	221.762	1.83349	0.24316	-7.54024	4.69121e-14	3.74392e-12
AT4G19230	33.4149	56.655	11.7644	270.099	398.044	157.513	2.72973	0.362015	-7.54037	4.68634e-14	3.74392e-12
AT5G53130	184.975	214.546	219	416.125	380.165	333.68	0.850247	0.112806	-7.53726	4.79955e-14	3.81507e-12
AT3G01550	133.659	181.11	125.789	352.179	377.342	476.685	1.41291	0.187937	-7.51801	5.56149e-14	4.40311e-12
AT1G53430	410.525	363.15	314.925	784.529	858.193	726.427	1.10402	0.147034	-7.50862	5.97528e-14	4.69331e-12
AT4G23750	48.9289	46.4386	68.7767	241.467	296.415	144.042	1.94448	0.258965	-7.50865	5.97389e-14	4.69331e-12
AT2G34090	62.0562	57.5838	62.442	166.068	222.076	221.762	1.68321	0.224543	-7.49615	6.57178e-14	5.14151e-12
AT1G30280	108.598	65.9428	90.4957	369.359	274.772	277.721	1.72645	0.230903	-7.47695	7.60656e-14	5.92775e-12
AT1G10090	319.828	481.104	323.975	946.78	746.214	969.951	1.21535	0.162591	-7.47487	7.72799e-14	5.99885e-12
AT3G55880	60.8628	62.2277	45.2479	326.41	305.825	291.193	2.29284	0.306836	-7.47253	7.86647e-14	6.08259e-12
AT3G05980	17.9008	19.5042	15.3843	90.6694	70.5751	68.394	1.99969	0.267742	-7.46872	8.09784e-14	6.23722e-12
AT3G06410	88.3107	93.8059	80.5412	251.011	212.666	220.726	1.34431	0.180072	-7.4654	8.30483e-14	6.37195e-12
AT5G56550	71.6033	88.2333	73.3015	19.0883	6.58701	17.6166	-2.27097	0.304469	7.4588	8.73131e-14	6.67341e-12
AT3G02250	340.116	384.511	258.818	747.307	702.928	699.484	1.10866	0.148665	-7.45745	8.82134e-14	6.71639e-12
AT3G15630	223.164	233.122	247.053	87.8062	37.6401	62.1763	-1.83744	0.246427	7.45632	8.89723e-14	6.74831e-12
AT4G27652	21.481	12.074	3.61983	112.621	98.8051	97.4096	2.779	0.37331	-7.4442	9.75341e-14	7.36958e-12
AT2G44670	184.975	138.387	133.029	439.985	330.291	288.084	1.19151	0.16062	-7.41816	1.18762e-13	8.93956e-12
AT1G12580	161.107	174.609	158.367	350.27	470.501	351.296	1.21822	0.164456	-7.40758	1.28629e-13	9.64575e-12
AT3G01795	36.995	55.7263	19.9091	397.991	267.244	188.602	2.64641	0.35816	-7.38892	1.4803e-13	1.10589e-11
AT4G27310	377.111	257.27	232.574	814.116	1075.56	809.329	1.58585	0.214968	-7.37713	1.61742e-13	1.2038e-11
AT3G24520	33.4149	53.8687	38.0082	236.695	154.324	378.239	2.41076	0.327869	-7.35282	1.94075e-13	1.43405e-11
AT5G14570	108.598	112.381	89.5908	234.786	241.837	224.871	1.15392	0.156936	-7.35278	1.94122e-13	1.43405e-11
AT1G56510	161.107	167.179	154.748	336.908	574.011	422.799	1.42479	0.193985	-7.34484	2.06004e-13	1.51619e-11
AT3G24190	269.706	328.785	253.388	681.452	582.48	605.183	1.10925	0.151095	-7.34139	2.11386e-13	1.55006e-11
AT1G28380	180.202	135.601	141.173	353.134	315.235	341.97	1.12834	0.154093	-7.32245	2.43487e-13	1.77889e-11
AT1G19050	151.56	172.751	96.8304	617.507	313.353	459.069	1.65869	0.226543	-7.32171	2.44824e-13	1.78211e-11
AT5G53970	84.7306	61.2989	50.6776	199.473	198.551	168.912	1.49027	0.20359	-7.31997	2.48022e-13	1.79879e-11
AT3G18830	263.739	170.894	157.463	682.407	537.312	531.608	1.51817	0.207851	-7.30413	2.79065e-13	2.01657e-11
AT3G15635	161.107	130.028	164.702	39.131	14.115	37.3058	-2.19656	0.300758	7.30342	2.80546e-13	2.01993e-11
AT4G23180	188.555	129.099	115.835	589.828	405.572	487.048	1.70701	0.234117	-7.29125	3.07082e-13	2.20301e-11
AT5G47230	17.9008	19.5042	16.2892	120.256	139.268	101.555	2.50826	0.34415	-7.28828	3.13944e-13	2.24413e-11
AT1G76580	115.759	260.985	105.88	620.37	444.153	555.442	1.67652	0.230952	-7.25917	3.8948e-13	2.7741e-11
AT2G37540	73.9901	60.3701	54.2974	173.704	203.256	136.788	1.41137	0.194552	-7.25445	4.03294e-13	2.86223e-11
AT3G19030	100.245	97.521	141.173	448.575	325.586	416.582	1.72884	0.238481	-7.24941	4.18598e-13	2.94978e-11
AT5G54630	224.357	292.563	261.533	106.894	94.1001	96.3733	-1.36275	0.187972	7.24973	4.1761e-13	2.94978e-11
AT2G05940	128.886	117.025	114.93	230.014	269.126	290.156	1.11026	0.153666	-7.22516	5.0052e-13	3.51461e-11
AT5G59732	304.314	304.637	156.558	765.441	595.654	701.556	1.39472	0.193052	-7.22457	5.02688e-13	3.5174e-11
AT1G78270	99.0512	86.3757	92.3056	26.7236	28.23	29.0156	-1.66654	0.230723	7.22315	5.07976e-13	3.54193e-11
AT1G33760	2.38678	2.78631	5.42974	44.8575	122.33	108.809	3.77132	0.522334	-7.22013	5.19374e-13	3.60874e-11
AT1G69870	221.97	463.457	124.884	1204.47	1358.81	1236.27	2.09477	0.290657	-7.20704	5.71811e-13	3.94549e-11
AT3G22970	657.557	621.348	422.615	251.011	195.728	204.146	-1.35373	0.187829	7.20728	5.70788e-13	3.94549e-11
AT1G02270	105.018	138.387	129.409	268.191	253.129	265.286	1.04795	0.14561	-7.19697	6.15639e-13	4.23321e-11
AT1G29430	85.9239	70.5866	91.4007	19.0883	15.997	11.399	-2.22491	0.309511	7.18845	6.55287e-13	4.45954e-11
AT1G52280	118.145	138.387	97.7354	237.649	250.306	238.343	1.01808	0.141625	-7.1886	6.54579e-13	4.45954e-11
AT2G22190	100.245	104.951	85.9709	314.957	229.604	243.524	1.39452	0.193989	-7.18867	6.54269e-13	4.45954e-11
AT5G01815	29.8347	36.2221	38.9132	157.478	182.554	219.69	2.25866	0.31458	-7.1799	6.97614e-13	4.73139e-11
AT3G24518	40.5752	55.7263	44.3429	237.649	157.147	369.949	2.26506	0.315617	-7.17662	7.14562e-13	4.82986e-11
AT2G12400	109.792	112.381	127.599	265.327	362.286	295.338	1.35862	0.189828	-7.15712	8.23891e-13	5.54995e-11
AT1G27200	68.0231	152.318	76.9214	371.267	329.35	331.607	1.71079	0.239388	-7.14652	8.90048e-13	5.97535e-11
AT5G60680	361.597	257.27	195.471	660.455	813.025	800.002	1.44352	0.202192	-7.13934	9.37784e-13	6.27463e-11
AT1G62030	70.4099	85.447	83.2561	24.8148	15.997	29.0156	-1.71797	0.240691	7.13766	9.49311e-13	6.33044e-11
AT4G36500	250.611	346.432	195.471	899.059	540.135	736.79	1.41323	0.198112	-7.13345	9.78816e-13	6.50536e-11
AT1G27100	275.673	229.407	267.867	475.299	573.07	508.81	0.994012	0.139398	-7.13073	9.98353e-13	6.61309e-11
AT2G28500	13.1273	17.6467	13.5744	93.5327	78.1031	93.2645	2.37872	0.333831	-7.12552	1.03689e-12	6.84557e-11
AT3G53990	548.958	509.895	401.801	1148.16	961.703	945.081	1.04588	0.146881	-7.12064	1.07425e-12	7.06874e-11
AT1G68490	343.696	435.594	422.615	1015.5	806.438	669.432	1.0257	0.144103	-7.11781	1.09656e-12	7.1917e-11
AT2G41640	11.9339	11.1453	14.4793	113.575	300.179	109.845	3.21937	0.452745	-7.11078	1.15388e-12	7.54276e-11
AT1G27210	227.937	266.557	327.594	98.3047	124.212	109.845	-1.28768	0.181222	7.10555	1.19844e-12	7.80831e-11
AT5G05410	13.1273	4.64386	19.0041	145.071	131.74	195.856	3.10807	0.437803	-7.09924	1.25445e-12	8.14657e-11
AT2G37710	483.322	344.574	319.45	1023.13	1001.23	900.521	1.31582	0.185462	-7.09482	1.29522e-12	8.38391e-11
AT2G44140	531.058	362.221	285.966	148.889	135.504	130.57	-1.46059	0.205979	7.09098	1.33163e-12	8.59162e-11
AT4G17230	91.8909	140.244	90.4957	295.869	256.893	306.737	1.37114	0.193688	-7.0791	1.45098e-12	9.33133e-11
AT2G35290	7.16033	15.7891	9.04957	72.5355	207.02	141.969	3.16084	0.447364	-7.06546	1.6008e-12	1.02616e-10
AT5G59730	307.894	326.927	166.512	799.8	606.005	718.137	1.37024	0.194058	-7.06101	1.65292e-12	1.05617e-10
AT2G21210	223.164	191.327	196.376	77.3076	61.1651	77.7204	-1.45875	0.206761	7.05525	1.72285e-12	1.0965e-10
AT2G45660	165.881	214.546	153.843	481.98	584.362	413.473	1.42364	0.201794	-7.05491	1.72707e-12	1.0965e-10
AT3G04140	145.593	106.809	100.45	317.82	312.412	234.198	1.26694	0.179708	-7.05	1.78918e-12	1.13231e-10
AT5G13100	210.036	162.535	148.413	347.407	418.746	388.602	1.1314	0.160501	-7.04917	1.79991e-12	1.13549e-10
AT1G71240	144.4	196.9	121.264	321.638	305.825	299.483	0.984039	0.13967	-7.04545	1.84866e-12	1.16255e-10
AT1G63750	53.7025	58.5126	53.3925	146.025	173.144	162.695	1.49428	0.212659	-7.02664	2.11564e-12	1.32624e-10
AT2G28840	600.274	641.781	541.164	1213.06	1097.21	913.992	0.840816	0.11977	-7.02028	2.21426e-12	1.38371e-10
AT1G79440	399.785	345.503	351.123	687.179	655.878	564.769	0.789697	0.112558	-7.01592	2.28442e-12	1.42307e-10
AT2G44740	138.433	122.598	127.599	33.4045	35.7581	39.3784	-1.7671	0.251998	7.01235	2.34347e-12	1.4553e-10
AT3G54020	31.0281	57.5838	42.533	145.071	145.855	212.436	1.83579	0.261943	-7.00834	2.41164e-12	1.49296e-10
AT1G78265	102.631	85.447	87.7808	26.7236	29.171	25.9068	-1.68292	0.240323	7.00274	2.51e-12	1.54903e-10
AT5G62570	97.8578	118.883	81.4461	234.786	254.07	290.156	1.34871	0.193039	-6.98672	2.81381e-12	1.73115e-10
AT5G64840	1071.66	1238.98	898.622	2217.11	2098.43	2060.11	0.973599	0.139431	-6.98267	2.89616e-12	1.77631e-10
AT1G68568	27.4479	17.6467	15.3843	79.2164	82.8081	59.0675	1.78992	0.257396	-6.95397	3.5515e-12	2.16632e-10
AT3G45640	321.021	227.549	257.008	590.783	686.931	579.276	1.17972	0.169649	-6.95388	3.55385e-12	2.16632e-10
AT1G76160	745.868	833.108	761.069	1587.19	1600.64	1521.25	0.989184	0.142303	-6.95127	3.62015e-12	2.19999e-10
AT3G07360	162.301	214.546	183.706	371.267	581.539	413.473	1.25	0.180022	-6.94356	3.82328e-12	2.31635e-10
AT3G14200	93.0843	139.316	101.355	282.507	293.592	388.602	1.47628	0.212632	-6.94286	3.84236e-12	2.32083e-10
AT4G18880	108.598	73.3729	48.8677	235.741	202.315	223.835	1.48676	0.214447	-6.93301	4.1199e-12	2.48093e-10
AT4G22590	54.8958	53.8687	55.2024	166.068	177.849	146.114	1.52036	0.219578	-6.92401	4.39024e-12	2.63573e-10
AT5G06710	23.8678	29.7207	25.3388	99.2592	106.333	112.954	1.89618	0.274053	-6.91901	4.54802e-12	2.72223e-10
AT5G63790	106.212	128.17	47.9627	346.453	318.999	370.986	1.78827	0.258711	-6.91223	4.77087e-12	2.84705e-10
AT2G27260	34.6083	34.3645	66.0619	161.296	142.091	147.151	1.64892	0.238775	-6.90575	4.99399e-12	2.97127e-10
AT1G07180	189.749	247.053	126.694	507.749	666.229	593.784	1.58805	0.230033	-6.90357	5.07112e-12	3.00816e-10
AT1G14200	68.0231	53.8687	39.8181	3.81766	10.351	6.21763	-2.62898	0.381052	6.89929	5.22641e-12	3.09105e-10
AT4G02200	81.1504	51.0824	56.1073	147.934	199.492	167.876	1.42013	0.206223	-6.88637	5.72334e-12	3.36492e-10
AT5G17350	2.38678	0.928771	10.8595	47.7208	67.7521	80.8293	3.18358	0.462277	-6.88672	5.70914e-12	3.36492e-10
AT5G17305	11.9339	11.1453	0	129.8	50.8141	86.0106	2.98302	0.433323	-6.88406	5.81689e-12	3.40983e-10
AT5G06320	373.53	204.33	210.855	978.275	762.211	950.262	1.69381	0.246127	-6.88184	5.90826e-12	3.4532e-10
AT5G63130	4.77355	13.0028	6.3347	67.7635	95.9821	75.6479	2.83502	0.412289	-6.8763	6.14279e-12	3.57975e-10
AT5G10695	29.8347	45.5098	42.533	171.795	191.023	232.125	2.17639	0.317626	-6.85204	7.2805e-12	4.23035e-10
AT1G37130	3456.05	2915.41	1588.2	8333	6611.48	7503.65	1.44734	0.211572	-6.84088	7.87094e-12	4.5601e-10
AT1G09287	46.5421	30.6495	17.1942	111.667	102.569	143.006	1.84029	0.269102	-6.83863	7.99563e-12	4.61887e-10
AT1G15125	206.456	121.669	143.888	34.3589	15.997	23.8343	-2.44026	0.356857	6.83819	8.02024e-12	4.61966e-10
AT1G45688	291.187	335.286	309.495	578.375	503.436	495.338	0.737931	0.107921	-6.83769	8.04808e-12	4.6223e-10
AT3G27210	47.7355	50.1536	29.8636	183.248	162.793	229.016	2.03058	0.297175	-6.83296	8.31796e-12	4.76353e-10
AT5G18030	125.306	75.2305	114.93	14.3162	17.879	29.0156	-2.19419	0.321149	6.83231	8.35595e-12	4.77153e-10
AT4G14620	101.438	99.3785	90.4957	39.131	16.938	24.8705	-1.76466	0.258421	6.82862	8.57354e-12	4.86781e-10
AT5G14370	169.461	165.321	153.843	426.624	306.766	293.265	1.04891	0.153604	-6.82867	8.57029e-12	4.86781e-10
AT5G63340	39.3818	46.4386	26.2438	159.387	126.094	115.026	1.75107	0.256763	-6.81978	9.11789e-12	5.16213e-10
AT5G44565	14.3207	20.433	13.5744	108.803	61.1651	70.4665	2.12446	0.31154	-6.81923	9.15284e-12	5.16719e-10
AT1G61380	149.174	141.173	93.2106	312.094	270.067	265.286	1.1261	0.165165	-6.81805	9.22838e-12	5.19508e-10
ATCG00230	201.683	198.757	173.752	365.541	385.811	380.312	0.962606	0.141262	-6.81432	9.47124e-12	5.31673e-10
AT4G25500	313.861	334.358	330.309	629.914	532.607	683.94	0.898305	0.131954	-6.8077	9.91746e-12	5.55154e-10
AT2G18440	455.874	515.468	336.644	228.105	171.262	187.565	-1.13495	0.166809	6.80387	1.01844e-11	5.68495e-10
AT3G09032	4.77355	6.5014	7.23966	56.3105	46.1091	39.3784	2.59465	0.382177	-6.78912	1.12822e-11	6.26255e-10
AT5G14740	2787.75	3302.71	2984.55	6903.28	6319.77	5903.64	1.05149	0.154878	-6.78919	1.12767e-11	6.26255e-10
AT1G66500	15.514	19.5042	17.1942	63.9458	84.6901	63.2126	1.89371	0.278954	-6.78863	1.13203e-11	6.26624e-10
AT4G34760	239.871	136.529	192.756	65.8546	62.1061	72.5391	-1.45932	0.215161	6.78243	1.18169e-11	6.52295e-10
AT5G24030	73.9901	81.7319	79.6362	235.741	702.928	266.322	2.17879	0.321492	-6.77713	1.22585e-11	6.74795e-10
AT3G44635	69.2165	65.9428	54.2974	150.798	188.2	137.824	1.30167	0.192167	-6.77364	1.25584e-11	6.89395e-10
AT5G62900	32.2215	53.8687	38.9132	201.382	112.92	125.389	1.71269	0.252871	-6.77301	1.26131e-11	6.90491e-10
AT2G27820	241.064	184.825	157.463	94.4871	90.3361	87.0469	-1.07514	0.158749	6.77261	1.26484e-11	6.90518e-10
AT4G18270	85.9239	75.2305	85.9709	240.513	208.902	246.633	1.44322	0.213259	-6.76745	1.31074e-11	7.13616e-10
AT1G50740	42.962	36.2221	32.5785	120.256	122.33	104.664	1.58332	0.234355	-6.75607	1.41784e-11	7.67717e-10
AT3G47820	54.8958	43.6522	49.7726	145.071	162.793	124.353	1.49743	0.221639	-6.7562	1.4166e-11	7.67717e-10
AT1G48100	19.0942	71.5154	31.6735	336.908	269.126	362.695	2.61992	0.387813	-6.75563	1.42218e-11	7.67976e-10
AT2G27950	145.593	185.754	184.611	356.951	276.654	307.773	0.842715	0.124797	-6.75268	1.4514e-11	7.81634e-10
AT1G29460	66.8297	41.7947	50.6776	9.54415	5.64601	9.32645	-2.4061	0.356812	6.74332	1.54804e-11	8.29807e-10
AT4G30210	671.877	821.034	608.131	1259.83	1324.93	1301.56	0.873597	0.129558	-6.7429	1.55252e-11	8.29807e-10
AT5G54710	113.372	85.447	76.9214	310.185	362.286	247.669	1.66576	0.247042	-6.74282	1.55338e-11	8.29807e-10
AT4G27657	11.9339	0.928771	5.42974	39.131	39.5221	41.4509	2.44584	0.363538	-6.72789	1.72142e-11	9.17105e-10
AT5G43630	229.131	302.779	216.285	663.318	526.02	619.691	1.23772	0.184	-6.72677	1.73473e-11	9.21724e-10
AT5G64940	1430.87	1411.73	1024.41	2248.6	2264.05	2459.07	0.840021	0.125143	-6.71248	1.91344e-11	1.01397e-09
AT1G28140	247.031	266.557	203.615	389.401	436.625	383.421	0.746104	0.111346	-6.70077	2.07322e-11	1.09572e-09
AT1G68570	75.1834	96.5922	90.4957	201.382	225.84	156.477	1.11718	0.16675	-6.69971	2.08834e-11	1.10078e-09
AT4G05050	1439.23	1376.44	643.425	3370.04	2983.92	3936.8	1.5177	0.226582	-6.69825	2.10926e-11	1.10887e-09
AT2G18230	41.7686	43.6522	38.9132	99.2592	130.799	108.809	1.39315	0.208024	-6.69707	2.12639e-11	1.11492e-09
AT1G70090	237.484	249.839	222.619	559.287	1122.61	831.091	1.73529	0.259132	-6.69657	2.13374e-11	1.11583e-09
AT5G41740	53.7025	44.581	63.347	165.114	183.495	134.715	1.51726	0.226718	-6.69226	2.19754e-11	1.14618e-09
AT3G11420	53.7025	65.014	48.8677	167.977	181.613	169.949	1.56578	0.234015	-6.69091	2.2179e-11	1.15377e-09
AT2G23120	324.602	916.697	224.429	2071.08	2378.85	2421.77	2.07637	0.310369	-6.68999	2.23182e-11	1.15798e-09
AT4G27440	7396.62	7227.7	6721.12	3863.47	3141.06	3176.18	-1.05569	0.157832	6.68871	2.2515e-11	1.16515e-09
AT4G14270	249.418	204.33	131.219	77.3076	63.9881	63.2126	-1.46153	0.21996	6.64452	3.04211e-11	1.5702e-09
AT5G18080	72.7967	69.6578	89.5908	12.4074	25.407	13.4715	-2.03411	0.306336	6.64015	3.13362e-11	1.61325e-09
AT3G04640	9.5471	9.28771	11.7644	60.1281	63.0471	79.793	2.46983	0.372493	-6.63056	3.34418e-11	1.7172e-09
AT4G20830	281.64	381.725	180.086	745.398	662.465	791.712	1.34406	0.202823	-6.62677	3.43111e-11	1.75729e-09
AT2G25900	624.142	482.032	504.061	221.424	155.265	187.565	-1.46815	0.221591	6.62548	3.46121e-11	1.76815e-09
AT3G19850	213.616	215.475	196.376	71.5811	87.5131	72.5391	-1.39136	0.210013	6.6251	3.47016e-11	1.76818e-09
AT1G49220	1.19339	0	3.61983	36.2678	25.407	25.9068	3.09363	0.469313	-6.59182	4.34457e-11	2.20807e-09
AT1G70800	13.1273	5.57263	7.23966	50.584	52.6961	72.5391	2.4781	0.377437	-6.5656	5.18224e-11	2.62708e-09
AT2G35710	19.0942	17.6467	26.2438	86.8518	175.026	153.368	2.46345	0.375309	-6.56379	5.24568e-11	2.65247e-09
AT3G26512	64.443	66.8715	116.739	12.4074	9.41001	9.32645	-2.63018	0.400837	6.56171	5.31957e-11	2.68301e-09
AT2G28900	809.117	1079.23	380.987	2913.83	2004.33	2132.65	1.56765	0.238999	-6.55926	5.40741e-11	2.72041e-09
AT1G64770	261.352	296.278	191.851	523.974	485.557	465.286	0.960035	0.146749	-6.54202	6.06949e-11	3.04578e-09
AT5G45750	168.268	191.327	143.888	395.128	344.406	416.582	1.17046	0.17896	-6.54034	6.13804e-11	3.07242e-09
AT5G42760	16.7074	19.5042	20.814	58.2193	62.1061	81.8655	1.69881	0.25977	-6.53966	6.1657e-11	3.07851e-09
AT3G10720	243.451	274.916	259.723	645.185	656.819	532.644	1.20176	0.183878	-6.53566	6.3329e-11	3.15407e-09
AT5G07920	76.3768	143.031	79.6362	307.322	294.533	474.613	1.75099	0.267994	-6.53371	6.41607e-11	3.1875e-09
AT1G09897	25.0611	29.7207	27.1487	106.894	96.9231	98.4459	1.77406	0.27256	-6.50889	7.57104e-11	3.75191e-09
AT5G11650	63.2496	63.1564	46.1528	150.798	212.666	158.55	1.53732	0.236225	-6.50787	7.62262e-11	3.76808e-09
AT1G71040	188.555	201.543	218.095	409.444	401.808	374.094	0.939409	0.14448	-6.502	7.9259e-11	3.90827e-09
AT4G21215	115.759	161.606	219	597.464	359.463	397.929	1.38492	0.213075	-6.49968	8.04894e-11	3.95912e-09
AT3G61640	40.5752	30.6495	36.1983	137.436	127.035	90.1557	1.64443	0.253148	-6.49592	8.25258e-11	4.04927e-09
AT2G40610	526.284	374.295	519.445	188.02	139.268	180.311	-1.44251	0.222285	6.48948	8.61344e-11	4.21592e-09
AT1G33610	32.2215	28.7919	31.6735	148.889	81.8671	95.3371	1.72879	0.266855	-6.47841	9.26929e-11	4.52578e-09
AT4G20835	260.159	354.791	162.892	707.222	606.946	746.116	1.36267	0.210745	-6.46593	1.00675e-10	4.90344e-09
AT2G17660	1.19339	6.5014	4.52479	85.8974	72.4571	105.7	3.4531	0.534227	-6.46374	1.02149e-10	4.96311e-09
AT2G22980	353.243	342.717	393.656	207.108	123.271	116.063	-1.26354	0.19555	6.46148	1.03685e-10	5.02545e-09
AT4G16563	11.9339	10.2165	9.04957	81.1253	167.498	102.591	2.90271	0.449424	-6.45875	1.05575e-10	5.09497e-09
AT5G42570	52.5091	118.883	56.1073	212.835	200.433	209.327	1.39001	0.215217	-6.45866	1.05632e-10	5.09497e-09
AT5G38510	218.39	218.261	221.714	393.219	314.294	430.053	0.773332	0.119779	-6.45632	1.07279e-10	5.16184e-09
AT2G38470	72.7967	81.7319	87.7808	315.911	357.581	547.152	2.14846	0.33352	-6.44176	1.18092e-10	5.66844e-09
AT5G57630	206.456	260.056	256.103	728.219	428.156	515.027	1.17045	0.18194	-6.43318	1.2496e-10	5.98363e-09
AT1G51700	63.2496	100.307	66.9668	204.245	176.908	226.944	1.34683	0.209702	-6.42261	1.33959e-10	6.39912e-09
AT5G07010	60.8628	570.266	103.165	10.4986	15.997	16.5804	-3.2163	0.501531	6.41296	1.42725e-10	6.8015e-09
AT1G30620	44.1554	44.581	37.1032	114.53	95.0411	106.736	1.28769	0.200916	-6.40909	1.46388e-10	6.95936e-09
AT5G01255	152.754	73.3729	104.07	486.752	379.224	437.307	1.85858	0.290743	-6.3925	1.63193e-10	7.73976e-09
AT3G23000	352.049	348.289	169.227	962.05	672.816	861.142	1.46423	0.229195	-6.38855	1.67461e-10	7.92329e-09
AT4G35480	27.4479	35.2933	26.2438	100.214	94.1001	102.591	1.66155	0.260254	-6.38435	1.72125e-10	8.12464e-09
AT5G19120	167.074	247.053	154.748	62.9914	26.348	32.1244	-2.06844	0.32452	6.37385	1.84339e-10	8.68052e-09
AT1G72940	42.962	45.5098	25.3388	107.849	163.734	174.094	1.86506	0.292844	-6.36877	1.90553e-10	8.95191e-09
AT5G02760	325.795	259.127	435.284	85.8974	74.3391	81.8655	-1.94127	0.304889	6.36714	1.92589e-10	9.02626e-09
AT2G31370	128.886	143.031	108.595	251.966	289.828	239.379	1.01783	0.159927	-6.3643	1.96179e-10	9.17289e-09
AT2G18730	173.041	180.182	134.839	279.644	376.401	301.555	0.957546	0.150655	-6.35587	2.07252e-10	9.66785e-09
AT5G62220	126.499	114.239	139.363	225.242	257.834	227.98	0.884409	0.139346	-6.34687	2.19735e-10	1.02262e-08
AT1G31540	184.975	136.529	133.029	370.313	452.622	311.918	1.28332	0.202883	-6.32541	2.52566e-10	1.17266e-08
AT2G41410	212.423	143.031	120.359	378.903	722.689	478.758	1.6511	0.261108	-6.32345	2.55781e-10	1.18482e-08
AT3G62750	373.53	414.232	361.983	156.524	246.542	175.13	-0.978256	0.15514	6.30564	2.87002e-10	1.32635e-08
AT2G34110	60.8628	55.7263	75.1114	166.068	223.017	219.69	1.58846	0.251983	-6.30385	2.90341e-10	1.33867e-08
AT1G17360	245.838	341.788	264.247	523.019	558.014	488.084	0.8622	0.13694	-6.2962	3.05022e-10	1.4031e-08
AT3G59080	64.443	45.5098	52.4875	137.436	182.554	137.824	1.44737	0.229973	-6.29364	3.10107e-10	1.4232e-08
AT2G22080	63.2496	117.954	86.8759	259.601	191.964	189.638	1.20724	0.192211	-6.28078	3.36877e-10	1.54249e-08
AT5G15190	16.7074	16.7179	12.6694	80.1709	61.1651	94.3008	2.16472	0.344915	-6.27609	3.47201e-10	1.58611e-08
AT4G31800	50.1223	141.173	47.9627	431.396	472.383	333.68	2.16112	0.344734	-6.26893	3.63537e-10	1.65693e-08
AT5G65683	119.339	112.381	102.26	36.2678	40.4631	39.3784	-1.46188	0.233564	6.25898	3.87491e-10	1.76207e-08
AT4G35300	232.711	223.834	155.653	457.165	390.516	420.727	1.03104	0.164739	-6.25862	3.88402e-10	1.76218e-08
AT5G13930	192.135	215.475	106.785	450.484	719.866	823.837	1.8298	0.293006	-6.24491	4.24049e-10	1.91952e-08
AT1G73630	35.8016	36.2221	19.9091	104.986	79.0441	82.9018	1.481	0.237421	-6.23787	4.43563e-10	2.00329e-08
AT1G27930	303.121	260.985	247.958	476.253	496.849	414.509	0.764857	0.123172	-6.20966	5.30996e-10	2.39273e-08
AT4G01090	156.334	152.318	122.169	298.732	236.191	256.996	0.86683	0.139706	-6.20469	5.48061e-10	2.46404e-08
AT3G18775	48.9289	55.7263	73.3015	14.3162	4.70501	9.32645	-2.36619	0.382048	6.19343	5.88671e-10	2.64065e-08
AT3G60200	56.0892	44.581	55.2024	130.755	145.855	126.425	1.32789	0.214437	-6.19245	5.92363e-10	2.65122e-08
AT1G78290	23.8678	17.6467	10.8595	53.4472	63.0471	59.0675	1.66169	0.269884	-6.15705	7.41116e-10	3.30954e-08
AT5G39860	115.759	129.099	160.177	41.9943	18.82	43.5234	-1.85217	0.300925	6.15493	7.51123e-10	3.34671e-08
AT3G62690	35.8016	27.8631	32.5785	122.165	105.392	92.2283	1.64938	0.268066	-6.1529	7.608e-10	3.38224e-08
AT1G32700	170.654	187.612	171.942	82.0797	67.7521	56.995	-1.31914	0.214714	6.1437	8.06209e-10	3.57611e-08
AT4G15430	42.962	52.94	47.0578	149.843	109.156	118.135	1.33913	0.218021	-6.14222	8.13737e-10	3.60147e-08
AT5G65920	41.7686	22.2905	27.1487	87.8062	105.392	86.0106	1.55762	0.253765	-6.13805	8.35394e-10	3.6891e-08
AT2G45080	21.481	21.3617	19.0041	89.715	61.1651	69.4303	1.72983	0.281843	-6.13758	8.37865e-10	3.69181e-08
AT3G16560	152.754	132.814	98.6403	368.404	259.716	331.607	1.28002	0.20885	-6.12888	8.85011e-10	3.89092e-08
AT5G26030	207.65	124.455	112.215	383.675	515.669	517.1	1.59627	0.260502	-6.12768	8.91715e-10	3.91174e-08
AT1G26800	57.2826	56.655	47.0578	15.2706	16.938	9.32645	-1.832	0.299207	6.12286	9.19106e-10	4.02301e-08
AT5G24890	251.805	245.196	218.095	94.4871	111.038	121.244	-1.10737	0.180874	6.12231	9.22264e-10	4.02796e-08
AT4G32770	94.2777	80.8031	85.9709	185.157	183.495	169.949	1.02466	0.167386	-6.12154	9.26763e-10	4.03874e-08
AT1G29440	101.438	62.2277	57.0123	19.0883	22.584	9.32645	-1.9286	0.31548	6.1132	9.76525e-10	4.24628e-08
AT5G10550	218.39	208.045	247.958	108.803	113.861	92.2283	-1.08064	0.176792	6.11251	9.8074e-10	4.2553e-08
AT1G75380	1730.41	1754.45	1314.9	806.481	741.509	663.214	-1.09691	0.179764	6.10197	1.0477e-09	4.53593e-08
AT1G71030	682.618	560.978	670.573	314.003	241.837	248.705	-1.22319	0.200544	6.09935	1.065e-09	4.6008e-08
AT2G40270	189.749	154.176	167.417	359.814	359.463	308.809	0.987658	0.162034	-6.09539	1.09172e-09	4.70601e-08
AT1G14920	400.978	256.341	317.64	108.803	153.383	87.0469	-1.42571	0.234203	6.08749	1.14693e-09	4.93328e-08
AT4G30660	420.073	303.708	596.367	182.293	206.079	167.876	-1.22348	0.201037	6.08585	1.15876e-09	4.97342e-08
AT5G49330	3.58016	5.57263	9.04957	41.9943	37.6401	31.0882	2.23936	0.368348	-6.07947	1.20578e-09	5.16407e-08
AT3G18773	48.9289	57.5838	77.8263	13.3618	2.823	9.32645	-2.48494	0.40895	6.07638	1.22928e-09	5.25338e-08
AT3G24550	211.23	208.045	225.334	432.35	692.577	515.027	1.29974	0.214046	-6.07224	1.26141e-09	5.37913e-08
AT3G50500	698.132	576.767	538.449	364.587	291.71	277.721	-0.944691	0.155843	6.06181	1.34599e-09	5.7275e-08
AT5G37770	54.8958	71.5154	67.8718	132.664	318.058	243.524	1.7258	0.285124	-6.05283	1.42327e-09	6.04344e-08
AT1G12990	150.367	163.464	132.124	328.319	395.221	286.011	1.14646	0.189464	-6.05109	1.43872e-09	6.09598e-08
AT3G04010	35.8016	66.8715	37.1032	349.316	139.268	177.203	2.05166	0.339377	-6.04536	1.49077e-09	6.28971e-08
AT4G09570	82.3438	97.521	93.2106	199.473	162.793	174.094	0.944624	0.15625	-6.04561	1.48843e-09	6.28971e-08
AT5G26010	10.7405	15.7891	10.8595	58.2193	95.9821	54.9224	2.21051	0.366186	-6.03657	1.57427e-09	6.62795e-08
AT3G07350	50.1223	52.0112	75.1114	7.63532	15.056	4.14509	-2.40305	0.399294	6.01825	1.76313e-09	7.40739e-08
AT4G33985	8.35372	12.074	7.23966	91.6238	32.935	49.7411	2.33318	0.388129	-6.01136	1.83971e-09	7.71281e-08
AT1G70370	523.897	728.157	600.892	1018.36	1089.68	1052.85	0.755542	0.125716	-6.00989	1.85649e-09	7.76676e-08
AT4G10120	315.054	326.927	317.64	549.743	602.241	672.541	0.907364	0.151169	-6.00233	1.94504e-09	8.12013e-08
AT3G55610	405.752	553.548	304.066	1160.57	880.777	1140.94	1.28648	0.214519	-5.99706	2.00919e-09	8.37036e-08
AT3G29320	1459.51	1790.67	1486.84	947.734	914.653	810.365	-0.820338	0.137083	5.98425	2.17383e-09	9.01845e-08
AT5G18050	57.2826	30.6495	66.9668	4.77208	9.41001	6.21763	-2.52774	0.422377	5.98456	2.16978e-09	9.01845e-08
AT3G06510	348.469	403.087	307.685	561.196	622.943	621.763	0.757622	0.126726	-5.97844	2.25282e-09	9.32666e-08
AT4G29440	99.0512	128.17	109.5	230.014	236.191	240.415	1.03856	0.173772	-5.97658	2.27874e-09	9.41438e-08
AT1G22570	107.405	142.102	135.744	445.712	605.064	408.291	1.79418	0.300246	-5.97569	2.29116e-09	9.44606e-08
AT3G47420	93.0843	107.737	37.1032	300.641	326.527	390.675	1.93339	0.323593	-5.97475	2.3045e-09	9.48136e-08
AT5G12950	787.636	454.169	595.462	289.188	261.598	247.669	-1.17421	0.196601	5.97253	2.33598e-09	9.59102e-08
AT3G01810	229.131	298.136	283.252	443.803	463.914	476.685	0.752869	0.126216	-5.96493	2.4474e-09	1.00278e-07
AT3G14690	249.418	251.697	178.277	389.401	436.625	442.488	0.887663	0.148858	-5.96313	2.47444e-09	1.01177e-07
AT1G19400	301.927	358.506	228.954	606.054	503.436	511.919	0.851334	0.142788	-5.96224	2.48806e-09	1.01525e-07
AT3G15810	124.112	120.74	95.0205	277.735	263.48	223.835	1.1403	0.191417	-5.95717	2.56637e-09	1.04506e-07
AT1G56150	53.7025	33.4358	35.2933	5.72649	7.52801	6.21763	-2.27842	0.382933	5.94992	2.68269e-09	1.09019e-07
AT1G33110	165.881	124.455	87.7808	259.601	345.347	289.12	1.21283	0.204178	-5.94006	2.84917e-09	1.15466e-07
AT5G08640	38.1884	36.2221	29.8636	86.8518	79.9851	115.026	1.36781	0.23029	-5.93952	2.8585e-09	1.15466e-07
AT5G64170	316.248	385.44	326.69	554.515	661.524	611.401	0.813176	0.13691	-5.93951	2.85876e-09	1.15466e-07
AT3G29000	2.38678	1.85754	5.42974	38.1766	24.466	49.7411	2.84615	0.48056	-5.92257	3.16946e-09	1.27756e-07
AT1G73480	272.092	595.342	281.442	1108.08	953.234	1204.15	1.44305	0.243696	-5.9215	3.1901e-09	1.28327e-07
AT3G16860	16.7074	29.7207	30.7685	104.986	270.067	136.788	2.39517	0.404707	-5.91829	3.25313e-09	1.30598e-07
AT4G19520	325.795	366.865	266.057	568.831	915.594	627.981	1.1106	0.187713	-5.91651	3.28848e-09	1.31751e-07
AT5G40390	341.309	543.331	198.186	1099.49	853.488	1003.11	1.39139	0.23547	-5.90898	3.44235e-09	1.37638e-07
AT5G19850	65.6363	65.014	55.2024	113.575	143.032	158.55	1.12867	0.191104	-5.90607	3.50367e-09	1.39809e-07
AT5G09125	19.0942	8.35894	13.5744	80.1709	44.2271	77.7204	2.06797	0.350181	-5.90542	3.51752e-09	1.40081e-07
AT5G66070	41.7686	27.8631	27.1487	83.0341	104.451	168.912	1.77963	0.301473	-5.90311	3.56709e-09	1.4177e-07
AT1G22640	147.98	109.595	108.595	59.1737	27.289	42.4872	-1.44463	0.244742	5.90266	3.57687e-09	1.41875e-07
AT5G15450	509.577	555.405	399.991	789.301	954.175	825.909	0.798745	0.135441	-5.89735	3.6939e-09	1.46225e-07
AT2G06530	131.273	172.751	120.359	243.376	256.893	275.648	0.851553	0.144458	-5.89483	3.75067e-09	1.48178e-07
AT5G62430	204.069	179.253	161.082	454.302	364.168	405.183	1.13637	0.193034	-5.88687	3.9358e-09	1.55183e-07
AT2G35930	42.962	40.8659	48.8677	113.575	129.858	150.26	1.49944	0.254935	-5.88163	4.06244e-09	1.59859e-07
AT5G26340	208.843	172.751	112.215	551.652	445.094	337.825	1.37933	0.234529	-5.88127	4.0712e-09	1.59887e-07
AT4G06120	77.5702	90.0908	63.347	30.5413	23.525	22.798	-1.51777	0.258196	5.87838	4.14311e-09	1.6239e-07
AT4G01120	76.3768	78.0168	97.7354	183.248	218.312	162.695	1.12171	0.190862	-5.87707	4.17594e-09	1.63355e-07
AT1G68190	242.258	274.916	245.243	132.664	126.094	128.498	-0.967664	0.16466	5.87674	4.18435e-09	1.63362e-07
AT1G16720	692.165	757.877	702.247	1123.35	1200.72	1232.13	0.712284	0.121216	-5.87615	4.19918e-09	1.6362e-07
AT4G35485	21.481	22.2905	19.0041	65.8546	61.1651	81.8655	1.65607	0.282105	-5.87042	4.34703e-09	1.69049e-07
AT2G29090	34.6083	15.7891	29.8636	109.758	133.622	120.208	1.99617	0.340286	-5.86614	4.46062e-09	1.73128e-07
AT1G27910	101.438	206.187	114.025	352.179	348.17	366.84	1.28692	0.219465	-5.86389	4.52141e-09	1.75145e-07
AT1G20100	235.097	237.765	215.38	383.675	394.28	368.913	0.725232	0.123685	-5.86356	4.53058e-09	1.75159e-07
AT5G39660	83.5372	33.4358	40.7231	136.481	132.681	132.643	1.32639	0.226244	-5.86266	4.55522e-09	1.7577e-07
AT3G07700	201.683	265.629	179.182	401.809	393.339	373.058	0.836168	0.142797	-5.85564	4.7518e-09	1.83e-07
AT3G23480	142.013	111.453	80.5412	40.0854	29.171	38.3421	-1.55591	0.265771	5.85433	4.78933e-09	1.84088e-07
AT2G31820	177.815	184.825	170.132	265.327	290.769	288.084	0.65306	0.111663	-5.84849	4.96046e-09	1.90298e-07
AT1G17665	13.1273	27.8631	29.8636	133.618	53.6371	90.1557	1.78903	0.306132	-5.84398	5.09691e-09	1.95156e-07
AT2G23420	128.886	119.811	130.314	215.698	217.371	235.234	0.801418	0.137182	-5.84199	5.15804e-09	1.97102e-07
AT2G40460	134.853	144.888	189.136	392.265	593.772	330.571	1.41808	0.242751	-5.84168	5.16757e-09	1.97102e-07
AT5G18060	52.5091	39.0084	45.2479	6.68091	10.351	1.03627	-2.47999	0.424638	5.84024	5.21241e-09	1.98194e-07
AT5G53290	13.1273	13.9316	17.1942	66.8091	95.9821	65.2852	2.1124	0.361704	-5.84013	5.21617e-09	1.98194e-07
AT5G57780	88.3107	76.1592	90.4957	37.2222	20.702	27.9794	-1.50587	0.258205	5.8321	5.47354e-09	2.07577e-07
AT2G31880	325.795	229.407	197.281	637.549	619.179	548.188	1.22345	0.20983	-5.83066	5.52079e-09	2.0897e-07
AT3G06620	139.626	129.099	117.644	263.419	196.669	249.742	0.862111	0.14798	-5.82585	5.68226e-09	2.14673e-07
AT1G49130	51.3157	117.954	95.9255	25.7692	21.643	21.7617	-1.82329	0.313138	5.82265	5.79229e-09	2.18414e-07
AT2G47070	516.737	568.408	402.706	768.304	749.037	807.256	0.636802	0.10946	-5.81769	5.96665e-09	2.24563e-07
AT1G32920	72.7967	78.0168	55.2024	219.515	361.345	209.327	1.80686	0.31099	-5.81002	6.24641e-09	2.34648e-07
AT3G48100	106.212	78.0168	65.1569	305.413	179.731	175.13	1.35712	0.234198	-5.79476	6.84185e-09	2.56531e-07
AT2G17230	224.357	126.313	274.202	713.902	1076.51	479.794	1.7296	0.298648	-5.79144	6.97861e-09	2.60185e-07
AT3G21420	10.7405	16.7179	19.0041	96.3959	52.6961	43.5234	1.86957	0.322816	-5.79146	6.9776e-09	2.60185e-07
AT3G47080	106.212	91.0196	67.8718	168.931	176.908	175.13	0.963466	0.166357	-5.79156	6.97372e-09	2.60185e-07
AT1G07010	127.693	166.25	133.029	247.193	287.946	245.597	0.848876	0.146778	-5.78339	7.32083e-09	2.72433e-07
AT1G20620	13702.5	10692	10061.3	5838.16	5722.23	4689.13	-1.06399	0.184361	5.77126	7.86788e-09	2.92244e-07
AT4G29610	15.514	6.5014	25.3388	83.9885	71.5161	76.6842	2.07766	0.360122	-5.76933	7.95894e-09	2.95075e-07
AT2G32010	210.036	199.686	242.529	137.436	82.8081	93.2645	-1.04245	0.181063	5.75742	8.54112e-09	3.16069e-07
AT2G29720	29.8347	14.8603	9.95453	85.8974	57.4011	90.1557	1.95449	0.339553	-5.75607	8.60958e-09	3.1801e-07
AT1G29435	105.018	64.0852	59.7272	20.9971	23.525	10.3627	-1.87314	0.326155	5.74309	9.29635e-09	3.42741e-07
AT3G15354	137.24	157.891	130.314	239.558	238.073	286.011	0.82432	0.143665	-5.73778	9.59246e-09	3.53003e-07
AT2G22990	1329.43	1411.73	1472.37	916.238	910.889	844.562	-0.658099	0.114866	5.72927	1.00863e-08	3.70491e-07
AT2G47490	83.5372	85.447	76.9214	134.573	185.377	181.348	1.00229	0.174994	-5.7276	1.01861e-08	3.72779e-07
AT5G59450	82.3438	120.74	103.165	192.792	181.613	233.161	0.954177	0.166585	-5.72786	1.01708e-08	3.72779e-07
AT5G65310	297.154	339.002	298.636	663.318	523.197	562.696	0.882408	0.154172	-5.72354	1.04325e-08	3.81093e-07
AT2G36050	112.178	132.814	194.566	58.2193	37.6401	24.8705	-1.7566	0.307034	5.72118	1.05785e-08	3.85716e-07
AT5G66675	72.7967	51.0824	63.347	119.302	182.554	155.441	1.25181	0.218856	-5.71981	1.0664e-08	3.88124e-07
AT5G14560	9.5471	8.35894	10.8595	58.2193	39.5221	36.2695	2.00111	0.350446	-5.7102	1.12846e-08	4.09959e-07
AT4G22770	13.1273	12.074	14.4793	64.9002	35.7581	50.7774	1.76928	0.31092	-5.69046	1.26695e-08	4.59432e-07
AT5G54720	46.5421	36.2221	38.9132	125.028	141.15	112.954	1.55718	0.273827	-5.68672	1.29505e-08	4.68767e-07
AT1G22250	47.7355	29.7207	71.4916	151.752	143.032	117.099	1.39419	0.245679	-5.67486	1.38804e-08	5.01511e-07
AT5G19875	4.77355	7.43017	14.4793	69.6723	45.1681	43.5234	2.21212	0.390021	-5.67179	1.41312e-08	5.09646e-07
AT4G14580	15.514	22.2905	14.4793	56.3105	60.2241	54.9224	1.60495	0.28325	-5.66621	1.4599e-08	5.25563e-07
AT3G09390	750.641	439.309	304.971	1380.08	1295.76	977.205	1.24299	0.21944	-5.66438	1.47559e-08	5.30252e-07
AT3G21560	96.6644	117.025	130.314	264.373	227.722	245.597	1.05882	0.186987	-5.66254	1.49151e-08	5.35006e-07
AT5G20230	210.036	370.58	146.603	772.122	924.063	896.376	1.7164	0.303152	-5.66184	1.49755e-08	5.36202e-07
AT1G25440	1282.89	1497.18	931.201	667.136	474.265	602.074	-1.06526	0.188305	5.65709	1.5396e-08	5.50268e-07
AT2G26110	134.853	130.028	134.839	58.2193	51.7551	52.8499	-1.25595	0.222202	5.6523	1.58318e-08	5.64828e-07
AT3G14310	1671.94	1467.46	1415.35	896.196	748.096	847.671	-0.860821	0.152324	5.65125	1.59288e-08	5.67269e-07
AT5G14640	91.8909	99.3785	102.26	180.384	208.902	203.109	0.98169	0.174002	-5.64184	1.68246e-08	5.98102e-07
AT5G05190	64.443	85.447	46.1528	170.84	117.625	179.275	1.21206	0.214927	-5.63937	1.70674e-08	6.05648e-07
AT2G18560	42.962	41.7947	48.8677	11.453	5.64601	10.3627	-2.05784	0.36495	5.6387	1.71342e-08	6.06936e-07
AT2G15020	99.0512	107.737	132.124	273.917	218.312	284.975	1.15182	0.204422	-5.63454	1.75527e-08	6.20653e-07
AT1G26580	214.81	289.777	230.764	131.709	128.917	95.3371	-1.02889	0.182681	5.63218	1.7795e-08	6.28103e-07
AT4G35750	352.049	316.711	281.442	163.205	133.622	145.078	-1.07933	0.191678	5.63097	1.79197e-08	6.31384e-07
AT2G28550	323.408	554.476	348.408	1110.94	838.432	815.546	1.13298	0.201245	-5.62985	1.80367e-08	6.34381e-07
AT5G50100	71.6033	84.5182	88.6858	185.157	185.377	164.767	1.08689	0.193297	-5.62291	1.87769e-08	6.59247e-07
AT5G46510	60.8628	63.1564	79.6362	147.934	136.445	133.679	1.00085	0.178026	-5.62191	1.88855e-08	6.61893e-07
AT4G12000	33.4149	70.5866	12.6694	172.749	144.914	214.508	1.98281	0.352759	-5.62087	1.89998e-08	6.64727e-07
AT2G37480	449.907	353.862	366.508	263.419	173.144	211.4	-0.843759	0.150204	5.61743	1.93817e-08	6.76896e-07
AT3G45970	70.4099	67.8003	103.165	494.387	1255.3	607.256	2.67085	0.475801	-5.61337	1.98421e-08	6.91757e-07
AT5G62920	91.8909	102.165	64.252	297.777	196.669	173.058	1.31581	0.234552	-5.6099	2.02449e-08	7.04566e-07
AT2G25200	60.8628	62.2277	52.4875	17.1795	25.407	15.5441	-1.51655	0.271199	5.59204	2.2442e-08	7.79665e-07
AT1G23710	62.0562	33.4358	26.2438	132.664	107.274	129.534	1.53691	0.274978	-5.58923	2.28083e-08	7.91007e-07
AT5G00875	70.4099	64.0852	92.3056	13.3618	10.351	19.6892	-2.1245	0.380437	5.58437	2.34544e-08	8.11997e-07
AT1G18210	133.659	122.598	58.8222	351.225	283.241	337.825	1.53981	0.276028	-5.57845	2.42675e-08	8.38685e-07
AT1G09015	8.35372	6.5014	17.1942	44.8575	45.1681	47.6685	1.89743	0.340576	-5.57124	2.52933e-08	8.71105e-07
AT3G63210	145.593	99.3785	169.227	41.9943	63.0471	43.5234	-1.41747	0.254416	5.57147	2.52605e-08	8.71105e-07
AT1G34260	255.385	260.985	202.71	442.849	372.637	370.986	0.712801	0.128018	-5.56796	2.57735e-08	8.86108e-07
AT5G62090	152.754	186.683	178.277	340.726	534.489	312.954	1.15584	0.207623	-5.56701	2.59147e-08	8.89424e-07
AT2G30500	84.7306	143.96	135.744	217.607	305.825	383.421	1.26057	0.226588	-5.56325	2.64792e-08	9.06351e-07
AT5G39240	2.38678	8.35894	5.42974	65.8546	25.407	43.5234	2.46441	0.442991	-5.56312	2.64991e-08	9.06351e-07
AT3G05880	1182.65	1494.39	972.829	2699.09	2083.38	1981.35	0.869838	0.156453	-5.55974	2.70177e-08	9.22502e-07
AT3G52060	109.792	96.5922	132.124	55.3561	39.5221	42.4872	-1.26602	0.228203	5.54777	2.89333e-08	9.86214e-07
AT3G24170	338.922	329.714	207.235	524.928	527.902	555.442	0.863738	0.155925	-5.53946	3.03402e-08	1.0324e-06
AT2G42530	356.823	650.14	286.871	1787.62	1027.57	1182.39	1.53066	0.276382	-5.53822	3.05566e-08	1.03798e-06
AT4G13495	1557.37	1913.27	1873.26	1186.34	731.158	1020.73	-0.856483	0.155047	5.52402	3.31328e-08	1.12358e-06
AT3G61190	8.35372	9.28771	3.61983	30.5413	50.8141	35.2333	2.18981	0.396515	-5.52265	3.33928e-08	1.13046e-06
AT4G27940	27.4479	45.5098	35.2933	82.0797	98.8051	122.28	1.39774	0.253264	-5.5189	3.41129e-08	1.15288e-06
AT5G11790	298.347	459.742	221.714	788.347	603.182	660.106	1.0369	0.187935	-5.51732	3.44215e-08	1.16133e-06
AT1G05733	40.5752	27.8631	65.1569	140.299	128.917	106.736	1.41068	0.255738	-5.51611	3.4658e-08	1.16733e-06
AT4G37260	78.7636	135.601	87.7808	341.681	351.935	269.431	1.56929	0.284689	-5.51231	3.54158e-08	1.19083e-06
AT5G05690	928.456	725.37	659.714	379.857	406.513	337.825	-1.01921	0.185	5.50924	3.6039e-08	1.20974e-06
AT5G54190	102.631	148.603	163.797	57.2649	53.6371	67.3577	-1.19702	0.217338	5.50765	3.63662e-08	1.21866e-06
AT4G34120	346.083	333.429	240.719	540.199	524.138	507.774	0.762633	0.138659	-5.50005	3.79693e-08	1.27025e-06
AT2G02450	62.0562	105.88	95.9255	206.154	170.321	211.4	1.10673	0.201645	-5.48852	4.05315e-08	1.35368e-06
AT1G73830	102.631	76.1592	63.347	11.453	32.935	19.6892	-1.76582	0.321865	5.48621	4.10646e-08	1.36919e-06
AT5G08760	35.8016	21.3617	70.5867	165.114	151.501	158.55	1.73665	0.316731	-5.48303	4.18109e-08	1.39174e-06
AT5G20150	79.957	76.1592	89.5908	228.105	398.044	227.98	1.66864	0.304515	-5.47966	4.26148e-08	1.41612e-06
AT2G21500	60.8628	57.5838	62.442	158.433	136.445	204.146	1.39544	0.254813	-5.47636	4.34169e-08	1.44037e-06
AT1G69760	90.6975	110.524	140.268	260.555	394.28	289.12	1.38827	0.253857	-5.4687	4.53347e-08	1.50002e-06
AT5G16200	3.58016	6.5014	6.3347	25.7692	39.5221	34.197	2.21467	0.404981	-5.46858	4.53659e-08	1.50002e-06
AT4G17550	47.7355	111.453	62.442	161.296	194.787	210.363	1.2848	0.235156	-5.46361	4.66555e-08	1.5401e-06
AT2G32100	93.0843	90.0908	132.124	20.9971	47.0501	22.798	-1.67923	0.307642	5.45839	4.80467e-08	1.58339e-06
AT4G26850	1082.4	1201.83	799.077	1495.57	1764.38	1960.63	0.749964	0.137642	-5.44866	5.07518e-08	1.66977e-06
AT3G16720	59.6694	35.2933	33.4834	117.393	114.802	112.954	1.37937	0.253473	-5.44188	5.27225e-08	1.73174e-06
AT1G35350	120.532	112.381	102.26	211.88	242.778	213.472	0.972846	0.178821	-5.44035	5.3176e-08	1.74375e-06
AT2G23770	91.8909	58.5126	115.835	29.5869	26.348	25.9068	-1.61349	0.29664	5.43921	5.35163e-08	1.75202e-06
AT1G18390	34.6083	38.0796	48.8677	125.028	119.507	98.4459	1.41215	0.259719	-5.43722	5.41194e-08	1.76885e-06
AT5G57050	56.0892	67.8003	47.0578	118.347	168.439	122.28	1.21113	0.222855	-5.43462	5.49128e-08	1.79184e-06
AT4G30690	368.757	359.434	314.925	216.652	165.616	172.021	-0.899509	0.165689	5.42888	5.67075e-08	1.84736e-06
AT3G49780	29.8347	34.3645	37.1032	113.575	105.392	76.6842	1.45106	0.267411	-5.42631	5.75305e-08	1.87111e-06
AT2G33480	42.962	61.2989	45.2479	17.1795	15.997	3.10882	-1.85176	0.341312	5.42542	5.78182e-08	1.87739e-06
AT5G64850	201.683	165.321	213.57	428.532	669.993	492.229	1.3826	0.254892	-5.42425	5.81978e-08	1.88664e-06
AT5G13650	1568.11	1540.83	1175.54	2146.48	1886.71	2204.15	0.536135	0.0988479	-5.42384	5.83313e-08	1.88788e-06
AT2G37520	211.23	185.754	181.896	301.595	299.238	304.664	0.639027	0.117826	-5.42346	5.84548e-08	1.8888e-06
AT1G23310	5508.68	5789.03	4405.33	8521.02	8918.81	7806.24	0.674252	0.12436	-5.42178	5.90079e-08	1.90358e-06
AT4G30440	778.089	583.268	612.656	1143.39	1772.85	1156.48	1.0163	0.187465	-5.42128	5.91726e-08	1.9058e-06
AT2G26190	292.38	258.198	232.574	426.624	428.156	556.478	0.835793	0.154238	-5.41884	5.99854e-08	1.92885e-06
AT4G02350	322.215	312.996	276.917	500.113	535.43	443.525	0.68744	0.126876	-5.41819	6.0207e-08	1.93285e-06
AT2G34810	158.721	283.275	219.905	71.5811	115.743	72.5391	-1.3011	0.240482	5.41039	6.2888e-08	2.01566e-06
AT1G75180	280.446	239.623	230.764	395.128	368.873	405.183	0.633012	0.117009	-5.40995	6.30428e-08	2.01737e-06
AT4G15660	10.7405	21.3617	5.42974	65.8546	41.4041	63.2126	1.96195	0.362796	-5.40787	6.37801e-08	2.03768e-06
AT5G54130	59.6694	73.3729	40.7231	321.638	138.327	238.343	1.82455	0.337595	-5.40456	6.49676e-08	2.07229e-06
AT3G28200	174.235	118.883	129.409	287.279	443.212	287.047	1.22321	0.226504	-5.40039	6.64975e-08	2.11769e-06
AT2G47890	83.5372	85.447	82.3511	173.704	150.56	146.114	0.88207	0.163443	-5.39682	6.7831e-08	2.1567e-06
AT3G58790	114.565	158.82	140.268	259.601	350.994	251.814	1.02403	0.189756	-5.39653	6.79429e-08	2.15681e-06
AT2G34170	177.815	172.751	192.756	99.2592	97.8641	108.809	-0.824588	0.152813	5.39605	6.81248e-08	2.15913e-06
AT5G04980	20.2876	13.9316	23.5289	65.8546	56.4601	64.2489	1.5768	0.292242	-5.39553	6.83209e-08	2.1619e-06
AT1G66725	11.9339	15.7891	10.8595	61.0826	79.9851	40.4146	2.00218	0.371427	-5.39052	7.02525e-08	2.21949e-06
AT1G55450	326.988	231.264	240.719	772.122	419.687	656.997	1.16697	0.216649	-5.38645	7.18637e-08	2.26679e-06
AT4G38820	21.481	20.433	26.2438	0.954415	2.823	0	-2.89396	0.537955	5.37955	7.46709e-08	2.3516e-06
AT5G05270	47.7355	61.2989	64.252	105.94	149.619	136.788	1.12405	0.208994	-5.3784	7.51496e-08	2.36293e-06
AT3G14590	16.7074	22.2905	30.7685	85.8974	74.3391	113.99	1.79998	0.335033	-5.37256	7.76274e-08	2.43699e-06
AT5G39080	156.334	163.464	132.124	50.584	84.6901	59.0675	-1.177	0.219108	5.37179	7.79603e-08	2.44358e-06
AT1G78230	139.626	139.316	127.599	219.515	266.303	290.156	0.911941	0.170074	-5.36202	8.22963e-08	2.57542e-06
AT5G11160	27.4479	42.7235	41.628	85.8974	80.9261	92.2283	1.14558	0.213776	-5.3588	8.37748e-08	2.61757e-06
AT4G33490	109.792	115.168	105.88	52.4928	59.2831	51.8136	-0.995225	0.185849	5.35502	8.55459e-08	2.66871e-06
AT3G51895	75.1834	67.8003	69.6817	175.612	291.71	218.653	1.57787	0.295076	-5.34735	8.92532e-08	2.78e-06
AT2G08915	13.1273	26.0056	27.1487	78.262	101.628	93.2645	1.84378	0.345526	-5.33617	9.49286e-08	2.95215e-06
AT4G38825	20.2876	24.1481	27.1487	1.90883	2.823	0	-2.83048	0.531043	5.33004	9.81915e-08	3.04884e-06
AT5G21170	132.466	171.823	212.665	95.4415	63.9881	78.7567	-1.10244	0.207082	5.32368	1.0169e-07	3.15255e-06
AT1G23080	850.886	621.348	685.957	385.584	444.153	405.183	-0.795714	0.149733	5.31422	1.07114e-07	3.31553e-06
AT1G10470	335.342	339.93	265.152	813.162	625.766	509.846	1.01888	0.191858	-5.31061	1.09261e-07	3.37672e-06
AT1G07280	612.208	619.49	590.032	1183.47	979.582	972.024	0.765546	0.144292	-5.30552	1.12354e-07	3.46691e-06
AT1G07650	366.37	369.651	357.458	541.153	591.89	482.903	0.55474	0.104657	-5.30053	1.15467e-07	3.55747e-06
AT2G37970	15.514	30.6495	26.2438	83.0341	107.274	101.555	1.81814	0.343242	-5.29696	1.17749e-07	3.62214e-06
AT1G13390	82.3438	94.7347	72.3966	226.196	180.672	132.643	1.07633	0.203523	-5.2885	1.23325e-07	3.78781e-06
AT5G02830	157.527	165.321	180.991	250.057	302.061	319.172	0.769668	0.145608	-5.28587	1.25106e-07	3.83659e-06
AT2G40900	19.0942	12.074	14.4793	40.0854	46.1091	66.3214	1.62216	0.307021	-5.28355	1.26707e-07	3.87969e-06
AT4G39070	3.58016	24.1481	9.95453	97.3503	74.3391	52.8499	2.19263	0.416012	-5.27059	1.35985e-07	4.15737e-06
AT1G01470	300.734	790.384	262.438	1736.08	1153.67	1506.74	1.58477	0.30071	-5.27008	1.36364e-07	4.16255e-06
AT2G01420	541.798	505.252	618.991	405.626	295.474	303.628	-0.729209	0.138393	5.26912	1.37079e-07	4.17797e-06
AT5G44680	576.406	487.605	801.792	234.786	260.657	158.55	-1.44079	0.27352	5.26759	1.38227e-07	4.20649e-06
AT4G01460	95.471	104.022	105.88	23.8604	44.2271	41.4509	-1.40841	0.267928	5.25669	1.46674e-07	4.45675e-06
AT4G31390	122.919	156.034	139.363	223.333	241.837	244.56	0.739934	0.140868	-5.25267	1.49913e-07	4.54821e-06
AT1G57990	210.036	195.042	238.909	458.119	861.016	528.499	1.43733	0.273767	-5.25019	1.51939e-07	4.60265e-06
AT3G15750	34.6083	17.6467	37.1032	95.4415	76.2211	80.8293	1.42483	0.271653	-5.24503	1.56254e-07	4.72614e-06
AT5G58120	35.8016	40.8659	33.4834	82.0797	137.386	79.793	1.3717	0.261781	-5.23986	1.607e-07	4.85325e-06
AT2G37240	81.1504	97.521	68.7767	204.245	182.554	150.26	1.07846	0.206098	-5.23275	1.67005e-07	5.03601e-06
AT1G69900	19.0942	11.1453	19.0041	62.037	86.5721	56.995	1.88382	0.36027	-5.22892	1.70506e-07	5.13377e-06
AT2G30040	16.7074	30.6495	9.95453	63.9458	125.153	140.933	2.19195	0.419642	-5.22339	1.75677e-07	5.28146e-06
AT1G32060	4212.66	4394.95	4352.84	6682.81	6323.53	6294.32	0.564024	0.108057	-5.21967	1.79241e-07	5.37701e-06
AT4G29720	190.942	196.9	164.702	368.404	408.395	282.902	0.915787	0.175455	-5.21951	1.79396e-07	5.37701e-06
AT4G37320	26.2545	27.8631	42.533	117.393	76.2211	84.9743	1.42084	0.272499	-5.21414	1.84676e-07	5.52692e-06
AT3G13520	972.611	1026.29	617.181	1873.52	2054.21	1668.4	1.06306	0.204282	-5.20388	1.95175e-07	5.83236e-06
AT2G46710	341.309	260.056	299.541	167.977	175.026	191.71	-0.744704	0.143224	5.19958	1.9974e-07	5.9598e-06
AT2G20180	153.947	129.099	171.942	75.3988	76.2211	72.5391	-1.00387	0.19309	5.19898	2.00386e-07	5.97011e-06
AT3G14420	2731.67	2438.02	1837.06	4039.08	3930.56	3714	0.725047	0.13952	-5.19673	2.02826e-07	6.03376e-06
AT4G35730	41.7686	58.5126	39.8181	108.803	131.74	110.881	1.26175	0.242929	-5.19392	2.05916e-07	6.11654e-06
AT1G51805	1117.01	1016.08	1043.42	1806.71	1658.99	1519.18	0.637452	0.122786	-5.19156	2.08541e-07	6.18526e-06
AT5G58600	72.7967	64.0852	63.347	135.527	143.032	117.099	0.959876	0.185285	-5.18053	2.21255e-07	6.55258e-06
AT1G15260	258.965	213.617	341.169	145.071	130.799	126.425	-0.999769	0.19303	5.17935	2.22655e-07	6.58422e-06
AT3G11030	32.2215	52.0112	43.4379	118.347	87.5131	80.8293	1.10964	0.21426	-5.17896	2.23126e-07	6.58836e-06
AT2G09225	149.174	175.538	120.359	296.823	255.952	268.395	0.863657	0.16683	-5.17686	2.25648e-07	6.65295e-06
AT4G13800	33.4149	44.581	34.3884	111.667	170.321	88.0832	1.60424	0.310556	-5.1657	2.39536e-07	7.05193e-06
AT5G62520	29.8347	50.1536	40.7231	99.2592	164.675	133.679	1.59187	0.308333	-5.16284	2.4323e-07	7.1501e-06
AT2G27080	26.2545	39.9372	18.0991	104.986	256.893	145.078	2.24654	0.435185	-5.16226	2.43988e-07	7.16178e-06
AT1G75800	410.525	380.796	399.086	765.441	669.993	525.39	0.70424	0.136465	-5.16059	2.46172e-07	7.21524e-06
AT4G17150	130.079	155.105	150.223	246.239	250.306	225.907	0.710298	0.137828	-5.1535	2.55673e-07	7.48268e-06
AT3G02255	35.8016	29.7207	44.3429	117.393	72.4571	79.793	1.22925	0.23868	-5.15019	2.60229e-07	7.6048e-06
AT2G31010	121.726	201.543	120.359	318.775	453.563	335.752	1.26124	0.244975	-5.14847	2.6262e-07	7.66341e-06
AT3G48720	393.818	439.309	369.222	245.285	159.97	230.052	-0.906405	0.176065	5.14813	2.631e-07	7.66617e-06
AT3G23880	52.5091	52.94	39.8181	9.54415	17.879	11.399	-1.73089	0.336244	5.14771	2.63685e-07	7.67197e-06
AT2G41250	126.499	90.0908	62.442	264.373	200.433	303.628	1.38982	0.270027	-5.14695	2.64752e-07	7.69174e-06
AT4G33465	20.2876	40.8659	10.8595	196.609	84.6901	138.861	2.20452	0.428733	-5.14194	2.71911e-07	7.8882e-06
AT4G21560	85.9239	78.9456	67.8718	138.39	137.386	143.006	0.834921	0.162517	-5.13745	2.78493e-07	8.06737e-06
AT4G04340	1230.38	1364.36	1143.87	2095.9	1685.33	1841.46	0.578257	0.112707	-5.13061	2.88811e-07	8.35408e-06
AT2G26800	183.782	166.25	156.558	238.604	284.182	282.902	0.661827	0.12903	-5.12925	2.90898e-07	8.40221e-06
AT3G44450	211.23	149.532	99.5453	363.632	359.463	345.079	1.17387	0.228996	-5.12616	2.95704e-07	8.52863e-06
AT1G56220	1475.03	1060.66	1269.65	847.521	446.035	502.592	-1.06043	0.207027	5.12217	3.02036e-07	8.69865e-06
AT4G11280	99.0512	73.3729	60.6321	183.248	427.215	354.405	1.85821	0.362843	-5.12125	3.03521e-07	8.72877e-06
AT5G19855	217.197	217.332	211.76	321.638	328.409	292.229	0.535611	0.104595	-5.12078	3.04269e-07	8.73761e-06
AT5G24120	196.909	195.042	152.033	414.216	523.197	450.779	1.28918	0.251771	-5.12046	3.04784e-07	8.73978e-06
AT1G19180	72.7967	276.774	60.6321	516.339	558.014	637.308	1.86448	0.364545	-5.11453	3.1452e-07	8.98007e-06
AT1G21060	120.532	165.321	198.186	84.9429	87.5131	76.6842	-0.950954	0.18593	5.11457	3.14452e-07	8.98007e-06
AT4G33010	3892.83	4813.82	4269.59	5890.65	9143.71	7360.64	0.771995	0.150926	-5.11504	3.13673e-07	8.98007e-06
AT5G46520	33.4149	23.2193	41.628	101.168	69.6341	90.1557	1.33342	0.260757	-5.11367	3.15965e-07	9.00841e-06
AT1G42990	199.296	149.532	156.558	285.37	267.244	284.975	0.72158	0.141276	-5.10758	3.26303e-07	9.28982e-06
AT3G02470	3144.58	3176.4	2842.47	4810.25	4217.57	4490.17	0.551524	0.108056	-5.10407	3.32432e-07	9.45078e-06
AT5G48540	25.0611	47.3673	33.4834	79.2164	93.1591	103.627	1.3022	0.255217	-5.10231	3.35533e-07	9.52531e-06
AT1G68530	1760.25	2358.15	2179.14	1424.94	1274.12	1247.67	-0.672931	0.131896	5.10198	3.36114e-07	9.52818e-06
AT5G08920	59.6694	84.5182	77.8263	146.025	143.973	165.804	0.995413	0.195296	-5.09696	3.45158e-07	9.77063e-06
AT5G27930	116.952	119.811	80.5412	267.236	223.958	167.876	1.02412	0.20164	-5.07895	3.79531e-07	1.07284e-05
AT4G08040	15.514	13.9316	12.6694	37.2222	91.2771	53.8862	1.92107	0.378544	-5.07491	3.87682e-07	1.09432e-05
AT1G31130	100.245	113.31	125.789	200.427	256.893	216.581	0.956505	0.188598	-5.07167	3.94347e-07	1.11126e-05
AT5G52510	165.881	123.527	118.549	246.239	278.536	200.001	0.819983	0.161686	-5.07145	3.94802e-07	1.11126e-05
AT3G11820	183.782	130.028	103.165	295.869	264.421	299.483	1.02036	0.201409	-5.06612	4.06015e-07	1.14121e-05
AT1G17050	150.367	156.962	77.8263	272.963	260.657	260.104	1.01701	0.200857	-5.06337	4.119e-07	1.15611e-05
AT3G26910	50.1223	55.7263	59.7272	129.8	130.799	98.4459	1.07357	0.212336	-5.056	4.28137e-07	1.19999e-05
AT1G31690	273.286	236.837	317.64	169.886	114.802	146.114	-0.927925	0.183716	5.05087	4.39803e-07	1.23095e-05
AT2G23320	84.7306	54.7975	59.7272	183.248	138.327	208.291	1.34628	0.266618	-5.04947	4.43046e-07	1.23829e-05
AT5G02515	171.848	220.119	292.301	137.436	78.1031	77.7204	-1.19082	0.235867	5.04869	4.44843e-07	1.24156e-05
AT4G26540	609.821	605.559	564.693	286.325	415.923	295.338	-0.822913	0.163006	5.04835	4.45652e-07	1.24207e-05
AT5G52660	93.0843	76.1592	112.215	197.564	155.265	205.182	0.953734	0.188945	-5.04769	4.47185e-07	1.2446e-05
AT1G71710	139.626	275.845	185.516	381.766	413.1	381.348	0.935671	0.18556	-5.04243	4.59662e-07	1.27754e-05
AT1G20450	723.193	2540.19	607.226	6562.56	6075.1	6684.99	2.02769	0.402351	-5.0396	4.66494e-07	1.29472e-05
AT3G55430	165.881	243.338	155.653	343.589	488.38	452.851	1.14139	0.226753	-5.03361	4.81316e-07	1.33399e-05
AT4G20860	73.9901	136.529	52.4875	320.683	196.669	204.146	1.37571	0.273368	-5.03243	4.84311e-07	1.34042e-05
AT1G06430	429.62	364.078	269.677	710.085	741.509	589.639	0.917985	0.182498	-5.03012	4.90176e-07	1.35477e-05
AT1G01540	311.474	352.004	257.008	437.122	473.324	490.157	0.597328	0.118758	-5.0298	4.90997e-07	1.35515e-05
AT4G34770	31.0281	20.433	35.2933	3.81766	3.76401	2.07254	-2.48241	0.493679	5.02839	4.94625e-07	1.36327e-05
AT1G59910	116.952	115.168	106.785	216.652	225.84	252.85	1.00542	0.199986	-5.02744	4.97063e-07	1.36809e-05
AT1G15100	42.962	38.0796	19.9091	142.208	84.6901	76.6842	1.48639	0.295778	-5.02537	5.02472e-07	1.38107e-05
AT2G40340	7.16033	5.57263	8.14461	30.5413	26.348	26.9431	1.75972	0.350407	-5.02192	5.11579e-07	1.40416e-05
AT5G09870	996.479	1334.64	786.408	1712.22	2007.16	1757.52	0.797393	0.158805	-5.02122	5.1345e-07	1.40735e-05
AT1G53510	193.329	207.116	212.665	309.23	339.701	317.099	0.640379	0.127748	-5.01281	5.36396e-07	1.46822e-05
AT3G63200	245.838	164.393	141.173	402.763	414.982	315.027	1.01116	0.20177	-5.01146	5.40191e-07	1.47657e-05
AT4G27030	75.1834	91.0196	79.6362	167.023	239.014	161.659	1.15487	0.230477	-5.01077	5.42126e-07	1.47983e-05
AT4G30400	133.659	110.524	140.268	71.5811	50.8141	69.4303	-0.983105	0.196224	5.01011	5.43989e-07	1.48287e-05
AT3G18980	94.2777	150.461	149.318	55.3561	47.9911	48.7048	-1.31751	0.263059	5.00841	5.4882e-07	1.49399e-05
AT5G04340	46.5421	65.014	18.0991	210.926	128.917	231.089	1.90971	0.381668	-5.00359	5.62718e-07	1.52973e-05
AT1G24170	204.069	217.332	123.979	362.678	376.401	325.39	0.942003	0.188323	-5.00205	5.67242e-07	1.53992e-05
AT4G38400	71.6033	44.581	47.9627	183.248	240.896	116.063	1.59151	0.318837	-4.9916	5.98802e-07	1.62338e-05
AT2G02070	352.049	362.221	427.14	630.868	563.66	532.644	0.581925	0.116618	-4.98999	6.03834e-07	1.6348e-05
AT5G08790	115.759	94.7347	43.4379	221.424	186.318	245.597	1.30416	0.261412	-4.9889	6.07249e-07	1.6418e-05
AT2G35935	34.6083	31.5782	41.628	73.49	107.274	110.881	1.36455	0.27354	-4.9885	6.08491e-07	1.64293e-05
AT3G19680	415.299	274.916	220.81	1251.24	2481.42	1189.64	2.09478	0.420182	-4.98541	6.18314e-07	1.66718e-05
AT5G66800	27.4479	18.5754	24.4338	73.49	59.2831	69.4303	1.43102	0.287099	-4.98439	6.21576e-07	1.67371e-05
AT2G32210	7.16033	13.9316	8.14461	83.9885	57.4011	66.3214	2.34103	0.469747	-4.98359	6.24149e-07	1.67836e-05
AT5G56630	127.693	95.6634	84.161	261.51	167.498	230.052	1.06485	0.213711	-4.98266	6.27149e-07	1.68415e-05
AT5G12140	402.172	392.87	282.347	608.917	591.89	535.753	0.679378	0.136364	-4.9821	6.28986e-07	1.6868e-05
AT5G60850	306.701	325.07	241.624	672.863	528.843	386.53	0.840963	0.169007	-4.97589	6.49473e-07	1.7394e-05
AT5G18010	21.481	23.2193	18.0991	2.86325	3.76401	3.10882	-2.22358	0.447034	4.97407	6.5561e-07	1.75347e-05
AT5G26600	114.565	164.393	99.5453	46.7663	72.4571	53.8862	-1.09464	0.22027	4.96954	6.71126e-07	1.79256e-05
AT3G03850	54.8958	26.9344	32.5785	11.453	4.70501	9.32645	-1.89005	0.381055	4.96005	7.04768e-07	1.87988e-05
AT3G20810	10.7405	7.43017	12.6694	41.9943	22.584	39.3784	1.55327	0.313217	-4.95908	7.08274e-07	1.88671e-05
AT5G44670	60.8628	78.0168	86.8759	155.57	171.262	117.099	0.933976	0.188397	-4.9575	7.14054e-07	1.89955e-05
AT5G22690	32.2215	23.2193	29.8636	66.8091	143.973	82.9018	1.6447	0.331824	-4.95654	7.17601e-07	1.90644e-05
AT1G29500	88.3107	75.2305	127.599	21.9515	40.4631	26.9431	-1.58238	0.319565	4.95168	7.3575e-07	1.94944e-05
AT1G75960	63.2496	75.2305	88.6858	15.2706	16.938	20.7254	-1.8926	0.382202	4.95183	7.35202e-07	1.94944e-05
AT5G54940	739.901	636.208	640.71	1077.53	1276	974.096	0.708319	0.143395	-4.93962	7.82767e-07	2.07126e-05
AT3G26890	286.413	247.053	228.954	167.977	169.38	154.405	-0.624301	0.126516	4.93455	8.03352e-07	2.1229e-05
AT1G10150	109.792	110.524	85.9709	39.131	52.6961	48.7048	-1.08502	0.220101	4.92965	8.23772e-07	2.17397e-05
AT2G41110	177.815	238.694	148.413	364.587	330.291	335.752	0.845637	0.171576	-4.92863	8.28085e-07	2.18245e-05
AT5G21940	318.635	333.429	161.082	113.575	83.7491	109.845	-1.33001	0.269997	4.926	8.39298e-07	2.20908e-05
AT1G75810	31.0281	19.5042	18.0991	75.3988	59.2831	51.8136	1.37813	0.28028	-4.91697	8.78935e-07	2.31034e-05
AT5G62140	77.5702	72.4442	69.6817	118.347	154.324	122.28	0.828016	0.168428	-4.91614	8.82655e-07	2.31706e-05
AT5G67370	165.881	209.902	137.553	304.458	316.176	346.115	0.888745	0.18117	-4.90559	9.31459e-07	2.44195e-05
AT4G25700	105.018	96.5922	72.3966	217.607	157.147	216.581	1.07189	0.218609	-4.90323	9.42712e-07	2.46819e-05
AT1G09543	216.003	182.968	198.186	296.823	278.536	311.918	0.564177	0.115348	-4.89108	1.00285e-06	2.6222e-05
AT2G03550	133.659	128.17	152.033	70.6267	81.8671	71.5028	-0.87352	0.178728	4.88742	1.02164e-06	2.6678e-05
AT1G19670	385.464	1524.11	466.958	267.236	114.802	253.887	-1.72755	0.353806	4.88277	1.04607e-06	2.72802e-05
AT1G77210	140.82	114.239	189.136	81.1253	66.8111	65.2852	-1.03765	0.212753	4.87724	1.07578e-06	2.80183e-05
AT1G34640	60.8628	60.3701	80.5412	33.4045	15.056	23.8343	-1.40684	0.288628	4.87425	1.09221e-06	2.84089e-05
AT2G45680	21.481	35.2933	47.9627	145.071	154.324	70.4665	1.63562	0.33602	-4.86761	1.12956e-06	2.93259e-05
AT3G25585	140.82	123.527	86.8759	192.792	179.731	236.27	0.784311	0.161133	-4.86746	1.13042e-06	2.93259e-05
AT2G16430	163.494	184.825	116.739	252.92	284.182	300.519	0.832165	0.171027	-4.86569	1.14057e-06	2.95508e-05
AT5G39785	23.8678	45.5098	33.4834	83.0341	82.8081	97.4096	1.27278	0.261692	-4.86365	1.15239e-06	2.98182e-05
AT5G16030	945.163	1060.66	1317.62	728.219	608.828	573.059	-0.794508	0.163366	4.86335	1.15415e-06	2.98248e-05
AT4G38850	47.7355	38.0796	42.533	14.3162	9.41001	9.32645	-1.74927	0.359767	4.86222	1.16074e-06	2.99562e-05
AT1G29450	95.471	51.0824	79.6362	20.0427	37.6401	22.798	-1.39413	0.286874	4.85973	1.17546e-06	3.02967e-05
AT1G07477	7.16033	32.507	11.7644	114.53	78.1031	113.99	2.13333	0.439042	-4.85907	1.17941e-06	3.03591e-05
AT5G41590	13.1273	27.8631	8.14461	137.436	54.5781	54.9224	2.02715	0.417279	-4.85804	1.18556e-06	3.04779e-05
AT3G45260	142.013	189.469	148.413	335	289.828	267.358	0.867028	0.178593	-4.85478	1.20523e-06	3.09354e-05
AT5G05580	133.659	173.68	187.326	248.148	318.058	289.12	0.7632	0.157213	-4.85457	1.20647e-06	3.09354e-05
AT5G01732	56.0892	60.3701	66.9668	113.575	132.681	111.917	0.931687	0.191962	-4.85351	1.21298e-06	3.10623e-05
AT4G03125	1.19339	0.928771	7.23966	35.3134	31.053	27.9794	2.42177	0.499689	-4.84655	1.25624e-06	3.21288e-05
AT4G13560	169.461	221.048	205.425	123.12	95.9821	122.28	-0.801402	0.165378	4.84587	1.26058e-06	3.21984e-05
AT1G67360	93.0843	64.0852	48.8677	149.843	211.725	191.71	1.34639	0.279038	-4.8251	1.39932e-06	3.5696e-05
AT4G08925	71.6033	57.5838	43.4379	123.12	101.628	109.845	0.939087	0.194728	-4.82257	1.41724e-06	3.61068e-05
AT3G23820	1565.73	1996.86	1475.08	3336.63	2674.33	2560.63	0.748369	0.155216	-4.82146	1.42508e-06	3.62601e-05
AT4G38960	40.5752	44.581	23.5289	97.3503	63.0471	97.4096	1.19232	0.247437	-4.81868	1.44509e-06	3.67124e-05
AT5G22920	452.294	371.509	531.21	239.558	104.451	88.0832	-1.54495	0.32063	4.81848	1.44655e-06	3.67124e-05
AT3G29035	95.471	58.5126	19.0041	12.4074	6.58701	12.4353	-2.06503	0.428661	4.8174	1.45439e-06	3.68643e-05
AT1G78610	173.041	143.96	128.504	237.649	348.17	240.415	0.872832	0.18132	-4.81376	1.48115e-06	3.74948e-05
AT1G19140	16.7074	35.2933	21.719	70.6267	52.6961	72.5391	1.29792	0.269769	-4.81121	1.50022e-06	3.79293e-05
AT1G18382	4.77355	11.1453	10.8595	39.131	36.6991	36.2695	1.82107	0.378904	-4.80616	1.53854e-06	3.88485e-05
AT5G62910	118.145	87.3045	60.6321	230.014	168.439	176.166	1.07871	0.224552	-4.80382	1.55663e-06	3.92556e-05
AT2G36420	45.3487	33.4358	47.9627	85.8974	95.9821	101.555	1.11457	0.23211	-4.80189	1.57177e-06	3.9587e-05
AT5G23360	19.0942	33.4358	15.3843	77.3076	65.8701	71.5028	1.53134	0.318992	-4.80056	1.58224e-06	3.98004e-05
AT4G14690	2.38678	1.85754	9.95453	35.3134	15.056	36.2695	2.02228	0.421392	-4.79904	1.59428e-06	4.00525e-05
AT1G55310	105.018	114.239	85.9709	60.1281	56.4601	38.3421	-0.950685	0.198117	4.79861	1.59768e-06	4.00873e-05
AT5G10470	503.61	541.474	415.375	695.769	685.99	716.064	0.51574	0.107501	-4.79754	1.60622e-06	4.02508e-05
AT1G68010	1788.89	1963.42	1542.95	2667.59	3550.4	3018.66	0.785561	0.163764	-4.7969	1.6114e-06	4.03295e-05
AT3G17650	312.668	282.346	295.921	435.213	422.51	405.183	0.496326	0.103521	-4.79443	1.63141e-06	4.0779e-05
AT5G56870	442.747	299.993	214.475	123.12	109.156	75.6479	-1.52148	0.317631	4.79008	1.66711e-06	4.16192e-05
AT5G61810	124.112	248.911	120.359	355.997	313.353	310.882	0.956419	0.199709	-4.78906	1.67564e-06	4.17795e-05
AT5G43700	250.611	222.905	271.487	163.205	148.678	130.57	-0.745327	0.155707	4.78673	1.69519e-06	4.22142e-05
AT1G44446	1692.22	1729.37	1539.33	2530.15	2067.38	2465.29	0.501128	0.104735	-4.78471	1.71231e-06	4.25813e-05
AT1G70610	184.975	218.261	122.169	318.775	334.055	368.913	0.934514	0.195342	-4.78399	1.71851e-06	4.25813e-05
AT2G40080	5.96694	7.43017	2.71487	38.1766	24.466	29.0156	2.06982	0.432654	-4.78401	1.71829e-06	4.25813e-05
AT4G11290	73.9901	61.2989	65.1569	25.7692	11.292	17.6166	-1.70681	0.35676	4.7842	1.71667e-06	4.25813e-05
AT5G57560	186.169	171.823	199.996	713.902	2392.97	1011.4	2.33364	0.487832	-4.78369	1.72106e-06	4.25915e-05
AT1G78570	710.066	667.787	473.293	1040.31	992.756	969.951	0.686788	0.143789	-4.77635	1.78506e-06	4.41203e-05
AT5G62470	89.5041	197.828	98.6403	305.413	249.365	337.825	1.15533	0.241956	-4.77497	1.79733e-06	4.43684e-05
AT1G32860	25.0611	85.447	38.0082	259.601	105.392	161.659	1.65068	0.345771	-4.77391	1.80687e-06	4.44997e-05
AT5G44110	9.5471	18.5754	19.0041	45.8119	51.7551	45.596	1.44786	0.303287	-4.77388	1.80713e-06	4.44997e-05
AT5G15740	195.716	255.412	166.512	326.41	301.12	303.628	0.580238	0.12158	-4.77247	1.81979e-06	4.47559e-05
AT1G30250	39.3818	145.817	77.8263	15.2706	15.056	9.32645	-2.20266	0.461587	4.77193	1.82472e-06	4.48217e-05
AT1G70580	232.711	253.555	233.479	366.495	553.309	451.815	0.903499	0.189489	-4.76808	1.85986e-06	4.56286e-05
AT5G53570	161.107	171.823	175.562	260.555	250.306	269.431	0.601588	0.126222	-4.7661	1.87823e-06	4.60223e-05
AT1G72700	182.588	247.053	168.322	349.316	367.932	332.643	0.791196	0.166123	-4.76272	1.91002e-06	4.67437e-05
AT3G03225	14.3207	12.074	12.6694	61.0826	62.1061	43.5234	1.8659	0.391959	-4.76046	1.93156e-06	4.72128e-05
AT5G05890	120.532	101.236	117.644	71.5811	64.9291	44.5597	-0.885426	0.186144	4.75667	1.96816e-06	4.80482e-05
AT1G63830	113.372	128.17	69.6817	185.157	237.132	247.669	1.07004	0.224971	-4.75633	1.97145e-06	4.80695e-05
AT2G24100	57.2826	71.5154	38.9132	127.892	88.4541	134.715	1.02772	0.216107	-4.75559	1.97865e-06	4.81859e-05
AT1G49840	66.8297	61.2989	57.9173	112.621	195.728	165.804	1.2832	0.269849	-4.75525	1.98205e-06	4.82097e-05
AT2G02120	0	1.85754	4.52479	15.2706	15.997	20.7254	2.17634	0.458028	-4.75156	2.01856e-06	4.90376e-05
AT1G07870	26.2545	26.9344	27.1487	53.4472	70.5751	69.4303	1.20065	0.252742	-4.75051	2.02906e-06	4.91726e-05
AT1G24530	53.7025	56.655	57.9173	141.253	195.728	111.917	1.329	0.279757	-4.75055	2.02861e-06	4.91726e-05
AT4G25970	346.083	320.426	372.842	254.829	222.076	218.653	-0.580494	0.122272	4.74758	2.05865e-06	4.98289e-05
AT5G04550	298.347	361.292	280.537	442.849	495.908	461.141	0.563785	0.118838	-4.74415	2.09379e-06	5.06177e-05
AT1G35140	22.6744	38.0796	16.2892	150.798	913.712	291.193	2.76514	0.583059	-4.74247	2.11125e-06	5.09779e-05
AT1G11390	79.957	116.096	55.2024	169.886	164.675	156.477	0.937091	0.198044	-4.73174	2.22605e-06	5.36845e-05
AT1G71697	78.7636	89.162	53.3925	157.478	141.15	131.607	0.934392	0.197727	-4.72567	2.29357e-06	5.5179e-05
AT3G46600	192.135	156.962	164.702	256.738	382.988	410.364	0.999851	0.211568	-4.72591	2.29089e-06	5.5179e-05
AT1G09623	46.5421	42.7235	20.814	106.894	109.156	100.518	1.43255	0.30319	-4.72493	2.30195e-06	5.53136e-05
AT5G17310	196.909	182.039	223.524	326.41	298.297	311.918	0.620176	0.131479	-4.71693	2.39432e-06	5.74637e-05
AT2G19620	68.0231	62.2277	43.4379	118.347	190.082	119.171	1.24245	0.263804	-4.70976	2.48014e-06	5.94515e-05
AT5G23730	20.2876	13.9316	14.4793	45.8119	54.5781	40.4146	1.44249	0.306863	-4.70076	2.59189e-06	6.20554e-05
AT5G01730	65.6363	80.8031	93.2106	140.299	175.026	153.368	0.92824	0.197481	-4.70039	2.5966e-06	6.20933e-05
AT5G16370	115.759	123.527	137.553	62.037	60.2241	56.995	-1.04671	0.222722	4.69965	2.60608e-06	6.22453e-05
AT5G24570	89.5041	164.393	149.318	297.777	319.94	310.882	1.14134	0.242951	-4.69781	2.62972e-06	6.27345e-05
AT1G72520	64.443	205.258	76.9214	315.911	360.404	376.167	1.48917	0.31702	-4.6974	2.63497e-06	6.27541e-05
AT5G65470	155.14	260.056	156.558	398.945	967.349	529.535	1.58124	0.336632	-4.69725	2.63686e-06	6.27541e-05
AT4G19410	588.34	571.194	562.883	408.49	236.191	325.39	-0.817882	0.174204	4.69496	2.66654e-06	6.33845e-05
AT1G01430	537.025	428.164	499.536	317.82	292.651	306.737	-0.670768	0.143206	4.68395	2.81403e-06	6.68104e-05
AT3G57760	14.3207	24.1481	16.2892	47.7208	56.4601	53.8862	1.42363	0.303981	-4.68327	2.82329e-06	6.68705e-05
AT4G21740	19.0942	21.3617	24.4338	62.037	95.9821	58.0313	1.58149	0.337679	-4.68342	2.82131e-06	6.68705e-05
AT4G25620	161.107	136.529	153.843	270.099	324.645	277.721	0.921565	0.19682	-4.68227	2.83711e-06	6.71179e-05
AT3G08605	11.9339	11.1453	11.7644	48.6752	70.5751	54.9224	2.01417	0.430606	-4.67754	2.90343e-06	6.86053e-05
AT4G32400	64.443	84.5182	65.1569	150.798	117.625	147.151	0.919262	0.196718	-4.673	2.96825e-06	7.00536e-05
AT1G53090	103.825	97.521	96.8304	181.339	151.501	189.638	0.78783	0.168886	-4.66486	3.0882e-06	7.2798e-05
AT5G26920	68.0231	37.1509	51.5826	176.567	201.374	196.892	1.69529	0.363555	-4.66309	3.11498e-06	7.32926e-05
AT5G52050	11.9339	40.8659	14.4793	60.1281	128.917	130.57	1.96799	0.422046	-4.66298	3.11656e-06	7.32926e-05
AT4G35310	467.808	420.733	504.966	714.857	721.748	660.106	0.576266	0.123742	-4.65699	3.20864e-06	7.53689e-05
AT4G24160	91.8909	105.88	80.5412	157.478	196.669	175.13	0.899368	0.193348	-4.65154	3.2946e-06	7.72968e-05
AT4G27960	338.922	399.372	402.706	541.153	546.722	577.204	0.530838	0.114137	-4.65087	3.30536e-06	7.74577e-05
AT2G25590	59.6694	68.7291	47.0578	13.3618	24.466	26.9431	-1.35767	0.292117	4.64768	3.35683e-06	7.85712e-05
AT2G21330	4130.32	3042.65	1968.28	5422.03	7538.36	7228	1.09863	0.236423	-4.64689	3.36981e-06	7.87822e-05
AT1G04620	96.6644	93.8059	123.074	189.929	151.501	201.037	0.760517	0.163825	-4.64227	3.44609e-06	8.04709e-05
AT3G52870	297.154	227.549	196.376	426.624	334.055	389.638	0.666289	0.143597	-4.63999	3.48424e-06	8.12662e-05
AT1G01560	17.9008	3.71509	9.04957	58.2193	39.5221	49.7411	1.98073	0.426945	-4.63932	3.49563e-06	8.14363e-05
AT4G34390	147.98	102.165	92.3056	237.649	238.073	192.747	0.942919	0.203256	-4.63907	3.49982e-06	8.14385e-05
AT2G46340	620.562	688.22	553.834	937.236	775.385	936.79	0.499848	0.10779	-4.63723	3.53108e-06	8.20697e-05
AT1G05805	257.772	234.05	286.871	497.25	423.451	392.747	0.733108	0.158284	-4.63159	3.6286e-06	8.42377e-05
AT2G45685	21.481	34.3645	49.7726	144.117	152.442	68.394	1.59817	0.345139	-4.63052	3.64742e-06	8.45759e-05
AT3G21070	83.5372	95.6634	108.595	185.157	161.852	190.674	0.867926	0.187488	-4.62925	3.66998e-06	8.49134e-05
AT5G39610	109.792	53.8687	18.0991	6.68091	7.52801	11.399	-2.22494	0.48063	4.62922	3.67052e-06	8.49134e-05
AT5G54585	115.759	221.048	88.6858	52.4928	30.112	46.6323	-1.57671	0.340942	4.62456	3.75394e-06	8.67423e-05
AT2G46620	50.1223	44.581	26.2438	142.208	98.8051	75.6479	1.31252	0.283992	-4.62168	3.80639e-06	8.78521e-05
AT1G09823	73.9901	66.8715	58.8222	126.937	124.212	118.135	0.864473	0.187099	-4.6204	3.83001e-06	8.82947e-05
AT2G08475	62.0562	33.4358	39.8181	97.3503	109.156	99.4822	1.14248	0.247309	-4.61963	3.84417e-06	8.85183e-05
AT5G57150	66.8297	86.3757	62.442	155.57	132.681	123.316	0.901365	0.195164	-4.61851	3.86508e-06	8.88969e-05
AT2G36410	289.993	276.774	291.396	528.746	636.117	412.436	0.851105	0.184325	-4.6174	3.88569e-06	8.92676e-05
AT1G34780	113.372	126.313	99.5453	202.336	187.259	167.876	0.701719	0.152011	-4.61625	3.90732e-06	8.96397e-05
AT3G53620	108.598	134.672	119.454	207.108	184.436	185.493	0.648729	0.140537	-4.61606	3.91091e-06	8.96397e-05
AT2G18090	167.074	165.321	136.649	248.148	256.893	245.597	0.668048	0.144738	-4.61557	3.92014e-06	8.97478e-05
AT4G27830	173.041	132.814	123.074	401.809	273.831	230.052	1.03473	0.224488	-4.6093	4.04029e-06	9.23921e-05
AT5G18540	28.6413	37.1509	20.814	83.9885	63.9881	55.9587	1.17704	0.255436	-4.60796	4.06633e-06	9.28806e-05
AT4G39090	2773.43	2242.98	1954.71	1509.88	1212.01	1152.34	-0.833268	0.180856	4.60736	4.07812e-06	9.3043e-05
AT5G51040	51.3157	91.9484	59.7272	146.98	144.914	134.715	1.02085	0.221729	-4.60406	4.14331e-06	9.44218e-05
AT1G25400	10.7405	27.8631	25.3388	81.1253	74.3391	65.2852	1.61533	0.351037	-4.60158	4.19297e-06	9.54442e-05
AT5G22270	71.6033	61.2989	73.3015	22.906	22.584	15.5441	-1.60587	0.349101	4.60003	4.2244e-06	9.60494e-05
AT4G11360	131.273	99.3785	106.785	57.2649	41.4041	43.5234	-1.19194	0.25914	4.5996	4.23295e-06	9.61338e-05
AT1G68500	3.58016	32.507	5.42974	66.8091	63.9881	64.2489	1.90682	0.414763	-4.59736	4.2787e-06	9.70621e-05
AT2G32950	139.626	194.113	173.752	294.914	268.185	247.669	0.652748	0.142188	-4.59074	4.41676e-06	0.00010008
AT4G34900	292.38	252.626	234.384	158.433	147.737	168.912	-0.704044	0.153392	4.58983	4.43611e-06	0.000100404
AT4G18810	260.159	358.506	247.958	503.931	423.451	535.753	0.736473	0.160543	-4.58738	4.48833e-06	0.00010147
AT1G29510	60.8628	59.4414	39.8181	23.8604	25.407	11.399	-1.29875	0.283132	4.58708	4.49493e-06	0.000101504
AT3G22840	3.58016	5.57263	4.52479	69.6723	41.4041	49.7411	2.36424	0.515532	-4.58602	4.51785e-06	0.000101906
AT1G64780	69.2165	32.507	31.6735	86.8518	164.675	132.643	1.42695	0.311305	-4.58378	4.56655e-06	0.000102887
AT5G47650	58.476	73.3729	67.8718	114.53	120.448	119.171	0.793158	0.173052	-4.58336	4.57569e-06	0.000102976
AT3G26932	109.792	121.669	108.595	58.2193	41.4041	45.596	-1.17841	0.257158	4.58243	4.59611e-06	0.000103319
AT2G32930	44.1554	45.5098	35.2933	91.6238	75.2801	84.9743	0.979465	0.213877	-4.57957	4.65937e-06	0.000104623
AT3G01210	34.6083	62.2277	38.9132	105.94	85.6311	162.695	1.29322	0.282467	-4.57832	4.68725e-06	0.00010513
AT2G34650	19.0942	25.0768	46.1528	97.3503	111.979	66.3214	1.46062	0.319065	-4.5778	4.69885e-06	0.000105271
AT5G67480	196.909	300.922	140.268	449.529	530.725	368.913	1.03955	0.227204	-4.57541	4.7529e-06	0.000106362
AT3G54660	843.725	886.048	704.962	1112.85	1215.77	1223.84	0.537537	0.117492	-4.57508	4.76039e-06	0.00010641
AT2G16500	469.001	517.326	317.64	833.204	828.081	776.168	0.877767	0.191925	-4.57348	4.79688e-06	0.000107105
AT1G79270	145.593	218.261	142.983	290.142	341.583	345.079	0.914908	0.200372	-4.56605	4.97009e-06	0.000110848
AT1G49560	62.0562	52.94	52.4875	112.621	97.8641	109.845	0.908695	0.199126	-4.56342	5.0327e-06	0.000112119
AT5G07152	35.8016	45.5098	40.7231	14.3162	17.879	12.4353	-1.36306	0.299115	4.55698	5.18949e-06	0.000115482
AT3G62720	100.245	103.094	102.26	183.248	378.283	192.747	1.23237	0.270507	-4.55576	5.21958e-06	0.000116022
AT3G54830	198.102	174.609	160.177	384.629	263.48	367.877	0.902183	0.198109	-4.55396	5.26448e-06	0.000116889
AT4G14365	70.4099	38.0796	32.5785	216.652	142.091	127.462	1.62069	0.356025	-4.55217	5.30953e-06	0.000117758
AT3G61898	5.96694	14.8603	15.3843	0.954415	0	1.03627	-2.45907	0.540698	4.54795	5.417e-06	0.000120007
AT3G14440	97.8578	89.162	79.6362	199.473	172.203	263.213	1.18936	0.261697	-4.54482	5.49834e-06	0.000121674
AT4G11320	205.263	224.763	152.938	89.715	83.7491	93.2645	-1.08489	0.238796	4.54315	5.5419e-06	0.000122501
AT3G17655	147.98	123.527	129.409	208.062	204.197	222.799	0.653379	0.14384	-4.54241	5.56149e-06	0.000122798
AT4G24800	631.302	856.327	514.016	411.353	311.471	388.602	-0.83197	0.183217	4.5409	5.60145e-06	0.000123543
AT4G17098	267.319	274.916	238.004	353.134	384.87	345.079	0.46739	0.103094	-4.53364	5.79753e-06	0.000127726
AT2G24330	58.476	75.2305	77.8263	111.667	135.504	151.296	0.874611	0.192984	-4.53205	5.84148e-06	0.000128551
AT3G57020	87.1173	116.096	68.7767	165.114	222.076	189.638	1.04135	0.230034	-4.52693	5.98463e-06	0.000131266
AT4G00050	83.5372	78.0168	56.1073	128.846	130.799	131.607	0.829522	0.18323	-4.52722	5.9765e-06	0.000131266
AT5G43760	409.332	470.887	469.673	599.373	892.069	645.598	0.647516	0.143035	-4.52697	5.98342e-06	0.000131266
AT2G17480	112.178	138.387	114.93	215.698	343.465	260.104	1.11145	0.246061	-4.51698	6.27292e-06	0.000137437
AT5G54930	13.1273	37.1509	30.7685	100.214	52.6961	83.9381	1.40593	0.311508	-4.51329	6.38283e-06	0.000139691
AT3G47960	214.81	459.742	218.095	577.421	1015.34	588.603	1.22063	0.270598	-4.51085	6.45693e-06	0.000141157
AT5G20885	88.3107	52.0112	49.7726	129.8	116.684	124.353	0.949195	0.210448	-4.51034	6.47223e-06	0.000141336
AT2G24540	23.8678	26.9344	13.5744	47.7208	58.3421	50.7774	1.22014	0.270648	-4.50822	6.53751e-06	0.000142605
AT1G23730	89.5041	100.307	61.5371	122.165	223.017	187.565	1.04535	0.232038	-4.50508	6.63488e-06	0.000144571
AT2G05620	507.19	501.536	278.727	842.748	672.816	681.867	0.756088	0.167878	-4.5038	6.67494e-06	0.000145125
AT2G36390	257.772	318.569	340.264	547.834	482.734	456.996	0.676002	0.150088	-4.50403	6.66768e-06	0.000145125
AT5G15910	79.957	55.7263	75.1114	120.256	132.681	136.788	0.863292	0.192008	-4.49614	6.91998e-06	0.000150288
AT3G60980	71.6033	60.3701	61.5371	155.57	112.92	100.518	0.904649	0.201299	-4.49406	6.98775e-06	0.000151595
AT2G39130	90.6975	100.307	107.69	191.837	256.893	262.177	1.18266	0.263322	-4.49129	7.07926e-06	0.000153412
AT5G41750	69.2165	43.6522	32.5785	178.476	157.147	108.809	1.49348	0.333015	-4.48473	7.30068e-06	0.000158038
AT4G32800	40.5752	148.603	30.7685	246.239	278.536	232.125	1.61229	0.35965	-4.48293	7.36248e-06	0.000159203
AT3G18000	291.187	290.705	278.727	150.798	195.728	152.332	-0.773101	0.172546	4.48055	7.44505e-06	0.000160639
AT4G28703	9.5471	16.7179	21.719	54.4017	49.8731	49.7411	1.52598	0.34057	-4.48065	7.44147e-06	0.000160639
AT4G23040	82.3438	90.0908	71.4916	204.245	107.274	151.296	0.892247	0.199174	-4.47973	7.47387e-06	0.000161085
AT5G45110	176.621	121.669	131.219	221.424	338.76	326.426	1.01156	0.225852	-4.47884	7.50494e-06	0.000161405
AT5G45280	176.621	191.327	147.508	279.644	300.179	329.535	0.798784	0.178338	-4.47905	7.49768e-06	0.000161405
AT5G59870	281.64	260.985	264.247	432.35	334.055	387.566	0.506826	0.113172	-4.47838	7.52118e-06	0.000161579
AT2G37570	163.494	156.034	143.888	213.789	262.539	230.052	0.599915	0.134024	-4.47618	7.59897e-06	0.000163074
AT1G16840	133.659	175.538	133.029	255.783	244.66	292.229	0.816793	0.182495	-4.47569	7.61649e-06	0.000163111
AT2G42580	279.253	277.703	238.004	518.247	687.872	420.727	0.993142	0.221898	-4.47567	7.61709e-06	0.000163111
AT5G57220	29.8347	4.64386	10.8595	74.4444	43.2861	65.2852	1.82329	0.407403	-4.4754	7.62673e-06	0.000163142
AT4G36920	91.8909	85.447	95.9255	175.612	251.247	141.969	1.01316	0.22648	-4.47349	7.69519e-06	0.000164429
AT2G39650	11.9339	13.9316	15.3843	35.3134	39.5221	46.6323	1.4347	0.320904	-4.47083	7.79182e-06	0.000166315
AT5G42870	230.324	247.053	181.896	160.342	129.858	136.788	-0.62	0.138713	4.46966	7.83441e-06	0.000167044
AT3G54000	4.77355	10.2165	16.2892	33.4045	125.153	50.7774	2.20086	0.492615	-4.4677	7.90641e-06	0.000168399
AT5G11590	28.6413	34.3645	34.3884	78.262	61.1651	62.1763	0.995086	0.22302	-4.46187	8.12489e-06	0.000172867
AT5G45820	449.907	356.648	421.71	684.316	701.046	600.002	0.677179	0.151892	-4.45831	8.26099e-06	0.000175575
AT3G45010	127.693	165.321	126.694	313.048	233.368	201.037	0.804579	0.180485	-4.45788	8.27736e-06	0.000175735
AT5G61440	73.9901	36.2221	82.3511	12.4074	21.643	24.8705	-1.54735	0.347219	4.4564	8.33489e-06	0.000176767
AT4G18390	297.154	306.495	379.177	627.051	515.669	429.017	0.655691	0.147316	-4.45092	8.55029e-06	0.000181142
AT3G57880	109.792	129.099	88.6858	172.749	209.843	206.218	0.824385	0.185309	-4.44871	8.63858e-06	0.000182818
AT5G57960	139.626	139.316	112.215	214.743	217.371	176.166	0.628765	0.141359	-4.448	8.66721e-06	0.000183228
AT1G18200	11.9339	12.074	9.04957	27.678	82.8081	69.4303	2.06911	0.466178	-4.43846	9.06054e-06	0.00019134
AT1G63880	386.658	378.939	276.012	620.37	567.424	491.193	0.676056	0.152346	-4.43763	9.09528e-06	0.00019187
AT1G55110	59.6694	71.5154	73.3015	154.615	111.038	160.622	1.00734	0.227056	-4.43654	9.14169e-06	0.000192644
AT5G62130	64.443	71.5154	76.0164	170.84	164.675	151.296	1.1337	0.255577	-4.43587	9.17027e-06	0.000193042
AT4G26542	496.449	436.522	425.33	219.515	322.763	217.617	-0.820093	0.184961	4.43387	9.25573e-06	0.000194635
AT5G40450	1677.9	2894.98	2838.85	1112.85	834.668	1018.66	-1.25384	0.282876	4.43246	9.31644e-06	0.000195704
AT2G34720	90.6975	88.2333	85.9709	228.105	175.967	178.239	1.08044	0.243796	-4.43171	9.34878e-06	0.000196176
AT1G23740	397.398	429.092	274.202	554.515	914.653	731.608	0.967124	0.218337	-4.42949	9.44554e-06	0.000197849
AT3G28130	128.886	141.173	113.12	74.4444	68.6931	66.3214	-0.852597	0.192485	4.42943	9.4484e-06	0.000197849
AT1G63090	121.726	147.675	76.9214	272.963	209.843	220.726	0.986424	0.222747	-4.42844	9.49165e-06	0.000198545
AT4G22890	1485.77	1425.66	1127.58	2023.36	2307.34	1962.7	0.628408	0.141955	-4.42681	9.56371e-06	0.000199842
AT1G80440	418.879	253.555	197.281	39.131	131.74	69.4303	-1.6607	0.37532	4.42475	9.6552e-06	0.000201542
AT4G19420	428.426	327.856	293.206	202.336	191.023	172.021	-0.870083	0.196735	4.42261	9.75169e-06	0.000203343
AT5G45630	0	2.78631	4.52479	35.3134	21.643	43.5234	2.5661	0.580573	-4.41995	9.87237e-06	0.000205643
AT2G43710	875.947	809.889	844.325	1108.08	1115.09	1108.81	0.390288	0.088353	-4.41736	9.99116e-06	0.0002079
AT5G67300	212.423	380.796	152.938	569.786	814.907	633.162	1.34128	0.303744	-4.41583	1.00622e-05	0.000209159
AT1G77500	76.3768	88.2333	66.9668	130.755	132.681	149.223	0.81072	0.183788	-4.41116	1.02819e-05	0.000213503
AT3G09450	20.2876	18.5754	13.5744	33.4045	56.4601	62.1763	1.41293	0.320342	-4.4107	1.03038e-05	0.000213512
AT5G59550	63.2496	82.6606	48.8677	115.484	147.737	128.498	0.97234	0.220444	-4.41082	1.0298e-05	0.000213512
AT4G13830	226.744	328.785	330.309	182.293	172.203	170.985	-0.750592	0.170419	4.4044	1.06077e-05	0.00021958
AT4G22758	8.35372	14.8603	9.04957	40.0854	39.5221	49.7411	1.74159	0.395581	-4.40261	1.06956e-05	0.00022105
AT4G34220	224.357	231.264	222.619	142.208	142.091	136.788	-0.682468	0.155018	4.4025	1.0701e-05	0.00022105
AT1G60010	200.489	256.341	257.008	161.296	143.032	138.861	-0.687195	0.156158	4.40063	1.07936e-05	0.000222731
AT5G58620	40.5752	66.8715	33.4834	88.7606	125.153	101.555	1.10199	0.250468	-4.39975	1.08376e-05	0.000223408
AT3G62980	568.053	539.616	383.702	359.814	279.477	311.918	-0.640372	0.146167	4.38109	1.18086e-05	0.000243171
AT3G19010	274.479	227.549	130.314	711.039	337.819	449.742	1.17826	0.269182	-4.37717	1.20228e-05	0.000247326
AT3G57330	272.092	287.919	276.012	413.262	426.274	380.312	0.533678	0.121944	-4.37641	1.20649e-05	0.000247936
AT1G67050	125.306	116.096	144.793	80.1709	80.9261	70.4665	-0.731466	0.167354	4.37076	1.23813e-05	0.000254175
AT1G22370	53.7025	50.1536	78.7313	10.4986	22.584	19.6892	-1.62349	0.371657	4.36824	1.25252e-05	0.000256863
AT3G06380	151.56	90.0908	94.1155	65.8546	58.3421	43.5234	-0.957207	0.219239	4.36605	1.26512e-05	0.00025918
AT1G29660	1538.28	1337.43	1297.71	2007.13	1975.16	2111.92	0.536841	0.122985	-4.3651	1.27067e-05	0.000260049
AT4G33950	73.9901	61.2989	75.1114	118.347	163.734	111.917	0.876893	0.200933	-4.3641	1.27647e-05	0.000260968
AT4G24050	75.1834	70.5866	79.6362	19.0883	29.171	27.9794	-1.45002	0.332343	4.36304	1.2827e-05	0.000261971
AT1G50250	733.934	817.319	527.59	1082.31	1175.31	1066.32	0.664977	0.152436	-4.36232	1.28691e-05	0.000262561
AT4G27360	1.19339	1.85754	0.904957	8.58974	15.056	15.5441	2.15088	0.493187	-4.36117	1.29366e-05	0.000263669
AT4G26288	23.8678	32.507	26.2438	8.58974	6.58701	9.32645	-1.57864	0.362272	4.35761	1.31492e-05	0.000267727
AT4G19160	361.597	390.084	460.623	288.233	157.147	209.327	-0.87512	0.200914	4.3557	1.3264e-05	0.000269788
AT1G64380	56.0892	146.746	49.7726	336.908	170.321	339.897	1.57785	0.362694	-4.35035	1.35918e-05	0.000276172
AT1G20823	70.4099	40.8659	38.9132	108.803	121.389	129.534	1.20777	0.277657	-4.34985	1.3623e-05	0.000276523
AT1G30040	26.2545	30.6495	17.1942	53.4472	131.74	75.6479	1.63912	0.37693	-4.34862	1.36999e-05	0.0002778
AT5G41810	105.018	102.165	99.5453	170.84	159.97	161.659	0.668525	0.153764	-4.34774	1.37549e-05	0.000278631
AT1G74170	116.952	115.168	108.595	59.1737	63.9881	72.5391	-0.787446	0.181197	4.34581	1.38765e-05	0.000280807
AT1G44760	88.3107	89.162	65.1569	144.117	141.15	121.244	0.73263	0.168691	-4.34303	1.40531e-05	0.000284093
AT4G23630	588.34	942.703	514.016	1182.52	1170.61	1211.4	0.781356	0.179936	-4.34241	1.40928e-05	0.000284606
AT1G73080	122.919	174.609	129.409	222.379	250.306	243.524	0.724059	0.166811	-4.34059	1.42099e-05	0.000286679
AT2G38640	52.5091	44.581	35.2933	94.4871	103.51	92.2283	1.08754	0.250619	-4.33941	1.42863e-05	0.000287928
AT2G23340	14.3207	69.6578	23.5289	157.478	95.0411	107.772	1.55551	0.358742	-4.336	1.45096e-05	0.000292133
AT5G07150	34.6083	43.6522	38.0082	14.3162	17.879	11.399	-1.32222	0.304989	4.33531	1.45558e-05	0.000292766
AT5G57660	1084.79	1289.13	1250.65	2512.02	1623.23	1776.17	0.684336	0.157951	-4.33257	1.47376e-05	0.000295961
AT5G64340	200.489	194.113	193.661	125.028	142.091	113.99	-0.619751	0.143048	4.33247	1.47444e-05	0.000295961
AT3G49110	300.734	260.985	304.971	167.023	104.451	129.534	-1.0724	0.247643	4.33045	1.48806e-05	0.000298393
AT5G63370	250.611	386.369	281.442	460.028	515.669	441.452	0.609363	0.140739	-4.32973	1.4929e-05	0.000299062
AT1G62710	19.0942	52.0112	22.6239	80.1709	90.3361	104.664	1.41272	0.326357	-4.32877	1.49946e-05	0.000300072
AT2G42150	11.9339	12.074	10.8595	42.9487	29.171	48.7048	1.59285	0.368051	-4.3278	1.50604e-05	0.000300988
AT3G14720	163.494	226.62	182.801	378.903	348.17	332.643	0.854631	0.197481	-4.32765	1.50706e-05	0.000300988
AT1G51090	13.1273	168.108	29.8636	540.199	486.498	627.981	2.2676	0.524144	-4.32628	1.51648e-05	0.000302565
AT3G09520	31.0281	19.5042	14.4793	83.0341	49.8731	53.8862	1.41733	0.327678	-4.32537	1.52277e-05	0.000303516
AT5G64660	46.5421	32.507	19.0041	91.6238	114.802	76.6842	1.42651	0.329874	-4.3244	1.52945e-05	0.000304541
AT1G73390	163.494	212.689	188.231	396.082	340.642	364.768	0.925467	0.214053	-4.32354	1.53547e-05	0.000305433
AT4G31310	36.995	35.2933	39.8181	81.1253	78.1031	61.1401	0.93304	0.216188	-4.31588	1.58968e-05	0.0003159
AT4G25433	1.19339	21.3617	4.52479	35.3134	58.3421	104.664	2.20943	0.512035	-4.315	1.596e-05	0.000316841
AT1G64900	242.258	220.119	157.463	461.937	417.805	360.623	0.964325	0.223606	-4.31261	1.61336e-05	0.000319967
AT4G10910	21.481	20.433	23.5289	2.86325	5.64601	2.07254	-2.08385	0.483487	4.31005	1.6322e-05	0.000323381
AT1G30360	1371.2	3430.88	1689.55	3967.5	4194.04	4555.45	0.937885	0.217681	-4.30854	1.64336e-05	0.000325268
AT3G05840	291.187	390.084	347.504	560.242	528.843	433.162	0.548682	0.127522	-4.30264	1.68775e-05	0.00033372
AT1G07570	108.598	93.8059	63.347	170.84	151.501	156.477	0.833689	0.193879	-4.30005	1.70756e-05	0.000337303
AT1G78580	288.8	247.053	244.338	338.817	412.159	380.312	0.530651	0.123623	-4.29249	1.76681e-05	0.00034866
AT1G68560	1961.93	1910.48	2436.14	1633.96	1336.22	1376.17	-0.540835	0.12606	4.29029	1.78441e-05	0.000351785
AT5G38210	65.6363	59.4414	76.0164	111.667	142.091	131.607	0.902359	0.210532	-4.28608	1.8185e-05	0.00035815
AT4G34550	5.96694	4.64386	9.95453	21.9515	39.5221	24.8705	1.76898	0.412903	-4.28425	1.83356e-05	0.000360402
AT5G51990	2.38678	2.78631	4.52479	20.0427	24.466	44.5597	2.42866	0.566878	-4.28427	1.83337e-05	0.000360402
AT2G43120	36.995	43.6522	31.6735	66.8091	100.687	121.244	1.27393	0.297533	-4.28163	1.85529e-05	0.000364311
AT2G39660	84.7306	88.2333	58.8222	155.57	107.274	160.622	0.847567	0.198108	-4.27832	1.88313e-05	0.000369103
AT5G17040	1.19339	5.57263	5.42974	12.4074	22.584	24.8705	1.82142	0.425737	-4.27828	1.88341e-05	0.000369103
AT1G09467	16.7074	25.0768	23.5289	8.58974	3.76401	3.10882	-1.73383	0.405428	4.27653	1.89831e-05	0.000371658
AT5G07070	22.6744	35.2933	28.0537	81.1253	72.4571	81.8655	1.33804	0.312978	-4.27517	1.90989e-05	0.000373556
AT4G02075	68.0231	92.8771	47.0578	37.2222	27.289	20.7254	-1.21614	0.284593	4.27327	1.92627e-05	0.000376075
AT4G16490	432.006	468.101	255.198	638.504	648.35	638.344	0.723104	0.16922	-4.27315	1.92732e-05	0.000376075
AT4G21570	163.494	625.992	191.851	863.746	808.32	1214.51	1.43105	0.334903	-4.27302	1.92844e-05	0.000376075
AT4G15130	76.3768	132.814	59.7272	284.416	139.268	209.327	1.16069	0.272424	-4.26059	2.03884e-05	0.000397215
AT5G52750	35.8016	11.1453	10.8595	128.846	93.1591	66.3214	1.94209	0.456002	-4.25894	2.05395e-05	0.000399766
AT1G73670	130.079	143.031	107.69	218.561	192.905	209.327	0.689195	0.161854	-4.25813	2.06143e-05	0.000400829
AT1G48745	35.8016	13.9316	27.1487	68.7179	57.4011	49.7411	1.14606	0.269214	-4.25705	2.07144e-05	0.000401597
AT2G22240	194.522	157.891	149.318	344.544	504.377	321.244	1.1555	0.271414	-4.25735	2.06868e-05	0.000401597
AT4G38552	343.696	272.13	268.772	596.509	451.681	505.701	0.790138	0.185599	-4.25723	2.06973e-05	0.000401597
AT1G08500	20.2876	20.433	29.8636	57.2649	62.1061	58.0313	1.2278	0.288489	-4.25598	2.0814e-05	0.000403133
AT3G02630	287.607	244.267	201.805	175.612	155.265	140.933	-0.625042	0.147005	4.25184	2.12025e-05	0.000410258
AT5G23060	1439.23	1243.62	1134.82	2075.85	1780.37	2150.27	0.640135	0.150577	-4.25122	2.12611e-05	0.000410993
AT2G42620	120.532	171.823	193.661	83.0341	88.4541	95.3371	-0.855214	0.201247	4.24956	2.14188e-05	0.000413638
AT3G22380	1260.22	1474.89	1364.68	2028.13	1818.96	1791.72	0.449528	0.105838	-4.24733	2.16336e-05	0.000416944
AT3G58795	28.6413	44.581	24.4338	78.262	98.8051	62.1763	1.20988	0.284869	-4.24715	2.16506e-05	0.000416944
AT5G37440	11.9339	8.35894	12.6694	53.4472	37.6401	26.9431	1.63671	0.385369	-4.24713	2.16529e-05	0.000416944
AT1G28600	255.385	291.634	328.499	398.945	460.15	449.742	0.562831	0.132593	-4.24479	2.18798e-05	0.000420906
AT3G54400	695.745	966.851	680.528	1073.72	1375.74	1191.71	0.623552	0.146962	-4.24295	2.20605e-05	0.00042397
AT4G26290	13.1273	9.28771	12.6694	0	0.941001	1.03627	-2.38901	0.563212	4.24176	2.21776e-05	0.00042581
AT3G13350	63.2496	101.236	52.4875	144.117	142.091	124.353	0.884971	0.20897	-4.23492	2.28637e-05	0.000438559
AT1G13560	262.545	360.363	317.64	460.982	463.914	592.748	0.670862	0.158602	-4.22984	2.33862e-05	0.00044815
AT1G13245	211.23	200.615	210.855	132.664	120.448	75.6479	-0.897699	0.212423	4.226	2.37884e-05	0.000455418
AT1G66330	244.645	244.267	219.905	345.498	406.513	308.809	0.571888	0.13538	-4.22433	2.39652e-05	0.000458361
AT4G35985	10.7405	35.2933	18.0991	87.8062	99.7461	109.845	1.88988	0.44743	-4.22387	2.40141e-05	0.000458413
AT5G58430	287.607	232.193	213.57	356.951	540.135	473.577	0.875857	0.207349	-4.22406	2.3994e-05	0.000458413
AT3G07205	40.5752	46.4386	27.1487	99.2592	69.6341	65.2852	0.995446	0.235975	-4.21844	2.45997e-05	0.000468691
AT4G38970	10742.9	10356.7	8551.84	14447	16139.1	15333.7	0.618716	0.146668	-4.21849	2.45947e-05	0.000468691
AT1G27630	143.207	138.387	168.322	321.638	210.784	219.69	0.715968	0.169878	-4.21461	2.50206e-05	0.000476255
AT1G08920	175.428	182.039	95.0205	349.316	275.713	245.597	0.914137	0.216992	-4.21277	2.52258e-05	0.000479701
AT4G16950	848.499	977.996	732.11	1360.04	1258.12	1162.7	0.552506	0.131262	-4.20918	2.56294e-05	0.000486787
AT4G21510	54.8958	24.1481	26.2438	6.68091	10.351	9.32645	-1.71942	0.408508	4.20903	2.56474e-05	0.000486787
AT1G77840	217.197	177.395	159.272	141.253	99.7461	71.5028	-0.803205	0.191039	4.20441	2.61768e-05	0.00049636
AT3G02830	221.97	285.133	202.71	398.945	393.339	460.105	0.794739	0.189089	-4.20299	2.63415e-05	0.000499007
AT4G25450	173.041	219.19	165.607	310.185	303.943	290.156	0.678045	0.161446	-4.19984	2.67106e-05	0.000505517
AT3G18217	15.514	16.7179	16.2892	3.81766	1.882	3.10882	-1.9891	0.473775	4.19841	2.68797e-05	0.000508233
AT4G30290	17.9008	13.0028	34.3884	80.1709	99.7461	101.555	1.79181	0.42698	-4.19647	2.71106e-05	0.000512111
AT4G18220	68.0231	60.3701	99.5453	37.2222	32.935	36.2695	-1.06353	0.25345	4.19623	2.714e-05	0.00051218
AT5G04190	71.6033	31.5782	54.2974	17.1795	12.233	19.6892	-1.52911	0.364523	4.19482	2.73086e-05	0.000514872
AT4G34920	442.747	481.104	243.433	233.832	192.905	192.747	-0.885638	0.211166	4.19404	2.74024e-05	0.000516153
AT3G25600	42.962	38.0796	34.3884	81.1253	145.855	88.0832	1.34434	0.320748	-4.19127	2.77392e-05	0.000522001
AT5G63480	127.693	123.527	117.644	85.8974	35.7581	44.5597	-1.10263	0.263509	4.18442	2.85889e-05	0.000537483
AT1G07630	78.7636	93.8059	64.252	139.345	141.15	160.622	0.867394	0.207452	-4.18117	2.90012e-05	0.000544719
AT5G02840	397.398	350.147	297.731	554.515	459.209	460.105	0.490888	0.11742	-4.1806	2.90737e-05	0.000545564
AT5G24810	260.159	314.853	205.425	432.35	457.327	383.421	0.690178	0.165133	-4.17952	2.92119e-05	0.000547426
AT5G37600	504.803	257.27	244.338	1021.22	864.78	690.157	1.26157	0.301854	-4.1794	2.9228e-05	0.000547426
AT3G53260	842.532	642.71	503.156	1361	915.594	1379.28	0.851117	0.203681	-4.17867	2.93218e-05	0.000548666
AT1G18060	399.785	330.643	277.822	451.438	543.899	536.789	0.597074	0.142999	-4.17538	2.97485e-05	0.000556127
AT5G47910	218.39	200.615	196.376	265.327	414.041	366.84	0.748052	0.179229	-4.17372	2.99667e-05	0.000559678
AT5G11740	1892.71	1715.44	1764.67	2759.21	3239.87	2490.16	0.643568	0.154211	-4.1733	3.00214e-05	0.000560175
AT1G55210	124.112	146.746	125.789	238.604	245.601	195.856	0.752681	0.180373	-4.1729	3.00745e-05	0.000560556
AT4G30280	27.4479	60.3701	25.3388	104.986	300.179	166.84	1.94757	0.466738	-4.17272	3.00983e-05	0.000560556
AT5G11250	156.334	111.453	141.173	230.014	261.598	207.254	0.754881	0.181066	-4.16909	3.05817e-05	0.000569025
AT1G02300	157.527	123.527	101.355	68.7179	63.0471	71.5028	-0.880639	0.211419	4.16538	3.10834e-05	0.00057782
AT5G04480	161.107	177.395	159.272	265.327	302.061	208.291	0.62536	0.150332	-4.15987	3.18434e-05	0.000591021
ATCG00460	119.339	195.971	172.847	243.376	296.415	337.825	0.812994	0.195441	-4.1598	3.18531e-05	0.000591021
AT5G11580	216.003	281.418	185.516	165.114	140.209	134.715	-0.628466	0.151134	4.15833	3.20587e-05	0.000594283
AT5G15210	124.112	102.165	123.979	79.2164	51.7551	70.4665	-0.785903	0.189005	4.15811	3.20887e-05	0.000594284
AT1G20010	1619.43	1430.31	1505.85	1194.93	1033.22	912.956	-0.536791	0.129131	4.15695	3.22524e-05	0.00059676
AT5G11550	93.0843	88.2333	104.07	57.2649	53.6371	35.2333	-0.936336	0.225358	4.15488	3.25455e-05	0.000601623
AT3G17130	11.9339	10.2165	10.8595	35.3134	34.817	35.2333	1.48655	0.358449	-4.14716	3.36623e-05	0.000621689
AT5G64860	200.489	210.831	225.334	150.798	146.796	102.591	-0.664767	0.160349	4.14576	3.3869e-05	0.000624926
AT4G38550	358.016	289.777	278.727	609.871	467.678	536.789	0.77833	0.187816	-4.1441	3.41153e-05	0.000628885
AT2G32280	25.0611	13.0028	19.9091	51.5384	53.6371	41.4509	1.25741	0.303506	-4.14293	3.42895e-05	0.000630927
AT5G18255	235.097	126.313	141.173	81.1253	83.7491	88.0832	-0.950529	0.229428	4.14304	3.42736e-05	0.000630927
AT4G02920	1064.5	970.566	700.437	1583.37	1131.08	1426.95	0.587713	0.141909	-4.14147	3.45088e-05	0.000634375
AT3G50760	27.4479	27.8631	21.719	67.7635	68.6931	52.8499	1.21925	0.294449	-4.14078	3.46123e-05	0.000635689
AT3G47430	60.8628	46.4386	45.2479	94.4871	111.979	101.555	0.975179	0.235566	-4.13973	3.47717e-05	0.000637438
AT5G43440	230.324	219.19	221.714	167.023	116.684	102.591	-0.783455	0.189247	4.13986	3.47525e-05	0.000637438
AT5G22700	88.3107	98.4498	116.739	57.2649	56.4601	58.0313	-0.811685	0.196199	4.13704	3.51809e-05	0.000644346
AT2G35840	260.159	325.999	245.243	369.359	488.38	468.395	0.658196	0.159139	-4.13597	3.53451e-05	0.000646757
AT1G76700	69.2165	100.307	57.9173	131.709	122.33	136.788	0.75512	0.18276	-4.13176	3.59989e-05	0.000658114
AT5G49520	15.514	44.581	20.814	76.3532	127.976	89.1194	1.64785	0.399267	-4.12718	3.67242e-05	0.000670756
AT3G55760	22.6744	68.7291	52.4875	115.484	180.672	138.861	1.43852	0.348694	-4.12545	3.70015e-05	0.0006752
AT3G18080	1189.81	1139.6	811.747	679.543	525.079	603.111	-0.780201	0.189171	4.12432	3.71834e-05	0.000677898
AT4G24200	121.726	143.031	109.5	196.609	205.138	179.275	0.619539	0.15024	-4.12366	3.72896e-05	0.000679211
AT4G21410	46.5421	81.7319	56.1073	21.9515	21.643	30.0519	-1.2555	0.304701	4.12043	3.78162e-05	0.000688171
AT3G01690	693.358	460.671	566.503	366.495	371.696	384.457	-0.609696	0.148021	4.11897	3.80567e-05	0.000691915
AT1G66090	27.4479	22.2905	38.0082	56.3105	78.1031	92.2283	1.27985	0.311134	-4.1135	3.89699e-05	0.000707871
AT5G44580	269.706	331.571	237.099	572.649	400.867	458.032	0.748162	0.18192	-4.11259	3.91238e-05	0.000710016
AT1G43890	162.301	190.398	120.359	341.681	193.846	269.431	0.744741	0.181194	-4.11018	3.95351e-05	0.000716826
AT1G66230	34.6083	36.2221	28.9586	14.3162	15.056	3.10882	-1.44847	0.352536	4.10871	3.97877e-05	0.000720749
AT4G26860	196.909	197.828	140.268	311.139	265.362	292.229	0.685638	0.166946	-4.10695	4.00925e-05	0.000725146
AT5G67030	924.876	1311.43	836.18	1565.24	1879.18	1710.89	0.728512	0.177388	-4.10688	4.01034e-05	0.000725146
AT5G10790	103.825	90.0908	80.5412	156.524	142.091	157.513	0.71893	0.175154	-4.10457	4.05072e-05	0.000731781
AT2G22450	133.659	115.168	141.173	96.3959	54.5781	69.4303	-0.808041	0.196881	4.10422	4.05687e-05	0.000732226
AT2G18170	122.919	105.88	127.599	60.1281	67.7521	82.9018	-0.746672	0.181955	4.10361	4.06759e-05	0.000733495
AT3G56860	328.182	460.671	325.785	274.872	225.84	261.141	-0.549295	0.133948	4.10081	4.11701e-05	0.000741734
AT3G15850	878.334	911.125	618.991	1570.01	1109.44	1431.09	0.750318	0.183033	-4.09937	4.14277e-05	0.000745699
AT3G54880	95.471	94.7347	97.7354	67.7635	28.23	43.5234	-1.00979	0.246358	4.09887	4.15174e-05	0.000746637
AT3G10300	126.499	159.749	140.268	246.239	255.952	326.426	0.919188	0.224344	-4.09724	4.18114e-05	0.000751181
AT5G61210	233.904	200.615	181.896	382.72	302.061	308.809	0.674019	0.164513	-4.09705	4.18457e-05	0.000751181
AT1G66160	13.1273	32.507	13.5744	44.8575	105.392	69.4303	1.67507	0.40922	-4.09331	4.25258e-05	0.000762701
AT4G23920	60.8628	57.5838	43.4379	103.077	85.6311	90.1557	0.769315	0.188102	-4.08988	4.31596e-05	0.000772695
AT5G46860	231.517	197.828	190.946	152.706	127.035	145.078	-0.539401	0.131887	4.08987	4.31608e-05	0.000772695
AT5G18170	230.324	197.828	175.562	142.208	128.917	90.1557	-0.724864	0.177361	4.08693	4.37117e-05	0.000781697
AT5G38212	65.6363	61.2989	77.8263	110.712	139.268	136.788	0.880005	0.21533	-4.08677	4.37423e-05	0.000781697
AT3G03830	21.481	16.7179	12.6694	1.90883	0.941001	4.14509	-2.10034	0.514053	4.08585	4.39152e-05	0.000784082
AT4G04320	150.367	131.886	134.839	210.926	190.082	196.892	0.513424	0.125776	-4.08204	4.46416e-05	0.000796336
AT1G07720	315.054	405.873	342.979	507.749	778.208	456.996	0.692522	0.169732	-4.0801	4.5016e-05	0.000802293
AT5G58870	202.876	277.703	204.52	338.817	379.224	409.328	0.698499	0.171531	-4.07214	4.65828e-05	0.000829474
AT4G25350	14.3207	20.433	16.2892	49.6296	34.817	41.4509	1.20778	0.296688	-4.07089	4.6834e-05	0.000833201
AT4G13570	158.721	148.603	197.281	74.4444	102.569	106.736	-0.816609	0.200798	4.06681	4.76607e-05	0.000847149
AT2G09335	8.35372	8.35894	6.3347	33.4045	24.466	27.9794	1.63023	0.401351	-4.06186	4.86823e-05	0.000864535
AT1G04833	56.0892	67.8003	58.8222	83.9885	144.914	140.933	0.973228	0.239659	-4.06089	4.88856e-05	0.00086737
AT4G18215	77.5702	65.014	109.5	37.2222	44.2271	44.5597	-0.974055	0.239947	4.05946	4.91863e-05	0.000871926
AT2G18300	1083.6	924.127	944.775	753.033	579.657	543.007	-0.649524	0.160052	4.0582	4.94518e-05	0.000875852
AT2G24545	31.0281	33.4358	21.719	51.5384	64.9291	55.9587	0.962143	0.237138	-4.05731	4.9642e-05	0.000878438
AT2G43010	528.671	515.468	403.611	332.136	312.412	289.12	-0.625111	0.154094	4.05669	4.9774e-05	0.00087999
AT4G27050	57.2826	52.0112	68.7767	29.5869	21.643	29.0156	-1.10019	0.271271	4.05566	4.99919e-05	0.000883057
AT3G19970	48.9289	51.0824	33.4834	73.49	159.029	102.591	1.2436	0.306675	-4.05511	5.01108e-05	0.000884253
AT4G14990	151.56	186.683	131.219	96.3959	72.4571	96.3733	-0.806897	0.198991	4.05493	5.01486e-05	0.000884253
AT5G44070	307.894	201.543	172.847	412.307	345.347	417.618	0.768552	0.189572	-4.05414	5.03197e-05	0.000886483
AT3G16510	16.7074	12.074	20.814	42.9487	55.5191	41.4509	1.37769	0.340005	-4.05198	5.07867e-05	0.000893918
AT3G50910	29.8347	79.8743	38.0082	132.664	102.569	101.555	1.10633	0.273247	-4.04881	5.14787e-05	0.000905296
AT2G46530	124.112	144.888	168.322	81.1253	102.569	76.6842	-0.740695	0.183125	4.04474	5.23808e-05	0.000920345
AT2G24150	236.291	179.253	222.619	156.524	112.92	133.679	-0.655618	0.162187	4.04235	5.29181e-05	0.000928965
AT2G32540	124.112	78.0168	52.4875	174.658	147.737	160.622	0.90333	0.223484	-4.04203	5.29913e-05	0.000929426
AT4G19200	639.656	641.781	380.082	984.956	799.851	965.806	0.711448	0.176022	-4.04182	5.30379e-05	0.000929426
AT3G17020	347.276	428.164	342.979	227.151	246.542	223.835	-0.672397	0.166439	4.03989	5.34752e-05	0.000936264
AT2G38820	69.2165	53.8687	44.3429	20.0427	16.938	27.9794	-1.27055	0.314672	4.0377	5.3978e-05	0.000944236
AT1G29670	1162.36	1701.51	1683.22	2433.76	2836.18	2153.37	0.685522	0.169825	-4.03663	5.42248e-05	0.000947718
AT5G55400	113.372	156.962	95.0205	213.789	205.138	202.073	0.742042	0.183862	-4.03586	5.44028e-05	0.000949994
AT2G33050	146.787	108.666	193.661	53.4472	67.7521	81.8655	-1.09368	0.271143	4.03359	5.49313e-05	0.000958379
AT1G04430	928.456	964.993	857.899	1352.41	1734.27	1303.63	0.657618	0.163047	-4.0333	5.49986e-05	0.000958712
AT5G62460	90.6975	93.8059	92.3056	168.931	149.619	141.969	0.711933	0.176734	-4.02827	5.61884e-05	0.000978594
AT2G31150	72.7967	80.8031	86.8759	48.6752	37.6401	48.7048	-0.822632	0.204367	4.02526	5.69124e-05	0.000988604
AT3G05490	156.334	140.244	122.169	242.421	348.17	249.742	0.962822	0.239183	-4.02545	5.68653e-05	0.000988604
AT4G08500	112.178	151.39	96.8304	190.883	209.843	184.457	0.681039	0.16919	-4.02528	5.69074e-05	0.000988604
AT3G28910	140.82	146.746	190.041	277.735	257.834	244.56	0.681677	0.169368	-4.02484	5.70148e-05	0.000989518
AT3G12110	139.626	105.88	109.5	170.84	203.256	183.42	0.644727	0.16028	-4.0225	5.75849e-05	0.000997676
AT3G61220	44.1554	86.3757	47.0578	98.3047	144.914	118.135	0.969674	0.241063	-4.02249	5.75853e-05	0.000997676
AT5G56860	161.107	192.256	177.372	355.042	266.303	255.959	0.699992	0.174064	-4.02147	5.78356e-05	0.00100114
AT2G22690	40.5752	47.3673	34.3884	16.2251	16.938	17.6166	-1.19007	0.296108	4.01905	5.84328e-05	0.0010106
AT2G41010	19.0942	8.35894	13.5744	26.7236	57.4011	70.4665	1.683	0.41895	-4.01718	5.88996e-05	0.0010169
AT5G28840	898.621	760.664	587.317	1359.09	1038.87	1127.46	0.635765	0.158258	-4.01726	5.88782e-05	0.0010169
AT5G44290	349.663	317.64	289.586	441.894	429.097	480.83	0.491948	0.122599	-4.01264	6.00432e-05	0.00103574
AT5G52900	62.0562	91.0196	87.7808	51.5384	24.466	14.5078	-1.31779	0.328486	4.01171	6.02793e-05	0.00103892
AT3G57520	289.993	600.915	362.888	886.652	867.603	677.722	0.914502	0.228257	-4.00646	6.16354e-05	0.00106137
AT2G31890	146.787	146.746	124.884	229.06	214.548	210.363	0.630519	0.157515	-4.00291	6.2569e-05	0.00107651
AT5G06690	235.097	273.988	268.772	188.02	148.678	179.275	-0.593808	0.148424	4.00075	6.31432e-05	0.00108545
AT5G11670	1204.13	939.917	677.813	615.598	493.085	505.701	-0.786079	0.196527	3.99985	6.33824e-05	0.00108862
AT3G03385	8.35372	4.64386	5.42974	19.0883	59.2831	29.0156	2.05579	0.514316	-3.99714	6.41115e-05	0.00110019
AT1G76240	53.7025	78.9456	100.45	159.387	133.622	157.513	0.898425	0.224791	-3.99671	6.42296e-05	0.00110032
AT4G33300	322.215	277.703	244.338	605.099	554.25	401.037	0.853758	0.213607	-3.99686	6.41884e-05	0.00110032
AT2G17730	31.0281	34.3645	38.0082	104.986	63.9881	81.8655	1.18055	0.295405	-3.99638	6.43181e-05	0.00110089
AT3G51400	34.6083	18.5754	36.1983	104.986	76.2211	69.4303	1.35598	0.339406	-3.99517	6.46473e-05	0.00110557
AT4G16860	724.387	732.801	757.449	1122.39	1186.6	959.588	0.547897	0.137197	-3.9935	6.51045e-05	0.00111219
AT5G04250	40.5752	72.4442	36.1983	165.114	79.9851	104.664	1.14437	0.286568	-3.99335	6.51462e-05	0.00111219
AT4G08305	224.357	163.464	457.003	126.937	145.855	112.954	-1.08753	0.272407	3.99232	6.54294e-05	0.00111606
AT5G37780	390.238	399.372	447.954	276.78	296.415	258.032	-0.57305	0.143563	3.99163	6.56199e-05	0.00111835
AT4G35110	20.2876	52.0112	30.7685	56.3105	165.616	118.135	1.53289	0.384124	-3.99062	6.58996e-05	0.00112216
AT5G63380	145.593	177.395	122.169	261.51	241.837	196.892	0.638245	0.159974	-3.98967	6.61641e-05	0.0011257
AT3G19150	25.0611	23.2193	25.3388	60.1281	56.4601	48.7048	1.10043	0.27584	-3.98936	6.62507e-05	0.0011262
AT5G62360	146.787	772.738	380.082	1643.5	1242.12	1624.88	1.58523	0.3978	-3.98499	6.74842e-05	0.00114619
AT1G19380	31.0281	56.655	37.1032	123.12	103.51	134.715	1.39842	0.35144	-3.97912	6.91696e-05	0.00117382
AT4G24740	187.362	231.264	226.239	150.798	164.675	119.171	-0.569475	0.143158	3.97796	6.95089e-05	0.00117857
AT3G06655	31.0281	32.507	27.1487	10.4986	11.292	8.29018	-1.46354	0.36795	3.97756	6.96249e-05	0.00117953
AT1G27760	206.456	378.939	209.95	462.891	417.805	463.214	0.732774	0.184553	-3.97053	7.17116e-05	0.00121384
AT2G01150	31.0281	27.8631	38.0082	99.2592	59.2831	65.2852	1.12606	0.283786	-3.96799	7.248e-05	0.00122581
AT5G18400	114.565	117.954	88.6858	163.205	175.967	178.239	0.673316	0.169839	-3.96444	7.35695e-05	0.00124317
AT4G34790	29.8347	16.7179	17.1942	5.72649	4.70501	5.18136	-1.73458	0.437612	3.96375	7.37811e-05	0.00124569
AT1G12910	112.178	87.3045	73.3015	48.6752	48.9321	56.995	-0.789387	0.199683	3.9532	7.71113e-05	0.00129861
AT4G12830	103.825	140.244	109.5	183.248	159.97	219.69	0.646725	0.163591	-3.95331	7.7076e-05	0.00129861
AT5G01005	14.3207	11.1453	7.23966	40.0854	22.584	36.2695	1.45881	0.368985	-3.95356	7.69954e-05	0.00129861
AT1G28330	389.044	365.007	626.23	319.729	177.849	168.912	-1.01673	0.257349	3.95078	7.78967e-05	0.00131072
AT1G54050	35.8016	70.5866	59.7272	21.9515	11.292	21.7617	-1.45583	0.36855	3.95016	7.80983e-05	0.001313
AT2G38790	35.8016	25.0768	27.1487	100.214	46.1091	70.4665	1.2181	0.308416	-3.94953	7.83063e-05	0.00131539
AT1G04837	39.3818	42.7235	26.2438	75.3988	70.5751	73.5753	0.975314	0.247126	-3.94662	7.92618e-05	0.00133031
AT4G37610	53.7025	87.3045	99.5453	37.2222	24.466	25.9068	-1.3494	0.342007	3.94553	7.96229e-05	0.00133525
AT1G25682	103.825	121.669	85.066	158.433	165.616	214.508	0.770558	0.195486	-3.94175	8.08891e-05	0.00135534
AT2G15080	190.942	204.33	170.132	121.211	76.2211	107.772	-0.865345	0.219805	3.93687	8.25507e-05	0.00138177
AT4G09760	315.054	216.404	168.322	474.344	431.92	323.317	0.791355	0.201019	-3.93671	8.26056e-05	0.00138177
AT4G12980	569.246	551.69	580.078	756.851	901.479	726.427	0.477361	0.121267	-3.93646	8.26928e-05	0.00138206
AT2G04039	250.611	225.691	228.049	335.954	388.634	331.607	0.573224	0.145771	-3.93235	8.41202e-05	0.00140474
AT1G72645	50.1223	54.7975	45.2479	29.5869	18.82	19.6892	-1.07935	0.274542	3.93147	8.44263e-05	0.00140867
AT5G59790	36.995	49.2249	35.2933	96.3959	61.1651	99.4822	1.02048	0.259589	-3.93113	8.45464e-05	0.00140948
AT1G69840	140.82	163.464	115.835	223.333	361.345	203.109	0.87456	0.222495	-3.9307	8.46974e-05	0.00141082
AT3G28875	2.38678	1.85754	2.71487	25.7692	3.76401	21.7617	2.09969	0.534251	-3.93015	8.48925e-05	0.00141288
AT5G46105	8.35372	13.0028	14.4793	0.954415	2.823	2.07254	-1.95087	0.496993	3.92534	8.66073e-05	0.00144022
AT1G76130	57.2826	48.2961	52.4875	94.4871	92.2181	82.9018	0.749886	0.191087	-3.92432	8.69761e-05	0.00144514
AT2G34460	442.747	348.289	297.731	533.518	565.542	568.914	0.606107	0.154458	-3.9241	8.70545e-05	0.00144524
AT1G30330	341.309	375.224	368.318	570.74	517.551	417.618	0.460773	0.117461	-3.92277	8.7535e-05	0.00145079
AT2G33051	150.367	106.809	192.756	53.4472	66.8111	86.0106	-1.07328	0.273598	3.92282	8.75193e-05	0.00145079
AT2G02760	366.37	390.084	414.47	300.641	248.424	222.799	-0.599545	0.15298	3.91912	8.88737e-05	0.00147175
AT1G20440	1102.69	3790.32	1385.49	7802.34	5417.34	5185.51	1.39791	0.356762	-3.91833	8.91648e-05	0.00147534
AT5G59400	97.8578	74.3017	42.533	149.843	130.799	130.57	0.913265	0.233182	-3.91653	8.98334e-05	0.00148517
AT1G21080	220.777	227.549	170.132	299.686	298.297	290.156	0.515716	0.131739	-3.91468	9.05248e-05	0.00149535
AT4G16610	4.77355	3.71509	4.52479	22.906	10.351	20.7254	1.68195	0.429742	-3.91386	9.08337e-05	0.00149921
AT1G10155	108.598	108.666	81.4461	52.4928	54.5781	56.995	-0.834679	0.213361	3.91206	9.15126e-05	0.00150916
AT2G41870	91.8909	145.817	99.5453	62.9914	42.3451	48.7048	-1.07901	0.275989	3.90961	9.24455e-05	0.00152245
AT4G27560	107.405	340.859	109.5	460.982	388.634	479.794	1.16915	0.299051	-3.90954	9.24714e-05	0.00152245
AT4G18140	101.438	117.025	106.785	67.7635	74.3391	49.7411	-0.747414	0.191217	3.90873	9.27838e-05	0.00152632
AT5G66730	220.777	198.757	171.037	258.646	324.645	306.737	0.584142	0.149489	-3.90758	9.32251e-05	0.00153232
AT5G56980	62.0562	137.458	104.975	229.06	239.955	163.731	0.994183	0.254449	-3.9072	9.33733e-05	0.00153348
AT5G09460	264.932	260.985	309.495	186.111	179.731	192.747	-0.580456	0.148589	3.90646	9.3659e-05	0.00153691
AT4G34050	615.788	583.268	481.437	760.669	796.087	744.044	0.447754	0.114657	-3.90516	9.4163e-05	0.0015439
AT3G22430	76.3768	90.0908	92.3056	45.8119	43.2861	43.5234	-0.935895	0.239782	3.90311	9.49638e-05	0.00155575
AT5G10650	62.0562	59.4414	46.1528	20.0427	29.171	21.7617	-1.15409	0.295863	3.90075	9.58968e-05	0.00156974
AT5G12050	378.304	232.193	289.586	195.655	164.675	158.55	-0.776448	0.199371	3.89448	9.84084e-05	0.00160952
AT2G20960	256.578	210.831	255.198	431.396	404.631	302.592	0.638037	0.163894	-3.89298	9.90208e-05	0.00161821
AT1G52290	132.466	125.384	123.074	242.421	312.412	195.856	0.934547	0.240098	-3.89236	9.92735e-05	0.00162101
AT1G65960	1528.73	2295.92	1289.56	3294.64	2312.98	2436.28	0.636973	0.163655	-3.89216	9.93556e-05	0.00162101
AT5G38240	11.9339	13.9316	12.6694	37.2222	33.876	27.9794	1.26	0.323963	-3.88933	0.000100521	0.00163868
AT3G26980	70.4099	65.9428	58.8222	98.3047	125.153	105.7	0.736521	0.189413	-3.88843	0.000100894	0.00164341
AT3G08730	231.517	279.56	260.628	399.9	361.345	391.711	0.561941	0.144551	-3.88748	0.000101289	0.0016485
AT5G45100	96.6644	104.951	77.8263	53.4472	56.4601	38.3421	-0.878757	0.226077	3.88697	0.000101502	0.00165061
AT4G35830	1903.45	1893.76	1694.08	1538.52	1326.81	1390.68	-0.370131	0.0953885	3.88025	0.000104351	0.00169556
AT1G11440	64.443	75.2305	55.2024	25.7692	29.171	37.3058	-1.03437	0.266591	3.88	0.000104457	0.00169588
AT5G17220	14.3207	13.0028	12.6694	27.678	58.3421	30.0519	1.36756	0.352705	-3.87734	0.000105605	0.00171313
AT3G14870	20.2876	21.3617	19.9091	30.5413	79.9851	53.8862	1.29811	0.33485	-3.87668	0.000105889	0.00171634
AT4G08850	508.383	348.289	326.69	761.623	623.884	541.971	0.686163	0.177205	-3.87215	0.000107879	0.00174716
AT5G48490	723.193	483.89	598.177	1041.27	1063.33	1044.56	0.775795	0.200452	-3.87023	0.000108734	0.00175958
AT1G18810	106.212	168.108	162.892	88.7606	72.4571	56.995	-0.970099	0.251018	3.86466	0.000111244	0.00179874
AT1G11050	57.2826	72.4442	64.252	87.8062	148.678	141.969	0.921096	0.238468	-3.86255	0.000112208	0.00181285
AT1G42970	5100.54	5218.77	3165.54	6981.55	7858.3	7758.57	0.726181	0.188031	-3.86203	0.000112447	0.00181523
AT2G21200	38.1884	16.7179	20.814	3.81766	8.46901	4.14509	-1.79509	0.465201	3.85873	0.000113976	0.00183841
AT4G01950	226.744	207.116	218.095	275.826	900.538	389.638	1.17665	0.304996	-3.85793	0.000114349	0.00184294
AT1G19490	19.0942	16.7179	20.814	38.1766	51.7551	43.5234	1.14762	0.297538	-3.85707	0.000114755	0.00184731
AT2G23000	72.7967	52.0112	38.0082	109.758	113.861	113.99	1.00722	0.261143	-3.85696	0.000114806	0.00184731
AT5G41050	57.2826	60.3701	99.5453	114.53	145.855	131.607	0.807379	0.209373	-3.85618	0.000115173	0.00185172
AT3G21150	1.19339	0.928771	9.04957	15.2706	21.643	24.8705	1.87383	0.486099	-3.85482	0.000115815	0.00186053
AT5G46490	102.631	70.5866	73.3015	144.117	136.445	116.063	0.680153	0.176505	-3.85344	0.000116469	0.00186952
AT3G06760	62.0562	52.94	47.9627	93.5327	107.274	104.664	0.878003	0.227919	-3.85226	0.000117033	0.00187706
AT4G16146	97.8578	117.954	73.3015	243.376	135.504	174.094	0.896579	0.232808	-3.85114	0.000117568	0.00188288
AT5G58330	871.173	1047.65	642.52	1219.74	1427.5	1241.45	0.591525	0.153599	-3.85111	0.000117585	0.00188288
AT1G05253	187.362	191.327	211.76	291.097	313.353	295.338	0.590409	0.153332	-3.85053	0.000117864	0.00188583
AT2G35700	20.2876	30.6495	38.0082	61.0826	73.3981	50.7774	0.981934	0.255217	-3.84744	0.000119358	0.00190819
AT4G04630	82.3438	59.4414	64.252	39.131	27.289	29.0156	-1.05301	0.273765	3.84639	0.000119873	0.00191488
AT4G15030	31.0281	37.1509	32.5785	13.3618	11.292	15.5441	-1.23791	0.322085	3.84341	0.000121335	0.00193668
AT4G28330	4.77355	2.78631	6.3347	20.9971	20.702	16.5804	1.67928	0.43697	-3.84302	0.000121529	0.00193822
AT5G52780	115.759	117.954	85.066	62.9914	59.2831	56.995	-0.802754	0.208909	3.8426	0.000121738	0.00194
AT3G26445	19.0942	21.3617	13.5744	2.86325	4.70501	3.10882	-1.83775	0.47845	3.84105	0.000122511	0.00195075
AT2G36690	4.77355	8.35894	8.14461	20.0427	31.053	67.3577	1.95688	0.509917	-3.83763	0.000124226	0.00197648
AT3G54560	83.5372	81.7319	63.347	142.208	109.156	125.389	0.703139	0.183255	-3.83694	0.000124577	0.00198047
AT2G34510	299.54	333.429	407.231	634.686	1200.72	614.51	1.1484	0.299415	-3.83547	0.000125326	0.00199079
AT1G29357	39.3818	52.94	42.533	19.0883	17.879	23.8343	-1.10065	0.28699	3.83514	0.000125492	0.00199184
AT5G67280	299.54	247.982	265.152	203.29	195.728	178.239	-0.488867	0.12748	3.83485	0.00012564	0.00199259
AT4G10040	75.1834	61.2989	38.0082	124.074	115.743	129.534	1.02951	0.268477	-3.83463	0.000125755	0.00199282
AT3G25610	51.3157	33.4358	33.4834	91.6238	81.8671	94.3008	1.11287	0.290285	-3.83369	0.000126233	0.00199881
AT2G23430	34.6083	53.8687	70.5867	9.54415	29.171	16.5804	-1.38376	0.361234	3.83064	0.000127808	0.00202213
AT1G62570	46.5421	87.3045	30.7685	307.322	243.719	169.949	1.72609	0.451258	-3.82506	0.000130742	0.00206614
AT2G36580	211.23	169.965	156.558	253.874	241.837	249.742	0.471042	0.12315	-3.82495	0.000130798	0.00206614
AT1G72160	818.664	585.126	569.218	442.849	438.507	391.711	-0.622712	0.162849	3.82385	0.000131383	0.00207374
AT2G45450	36.995	34.3645	41.628	13.3618	14.115	21.7617	-1.1327	0.296549	3.81959	0.000133673	0.00210822
AT1G28670	183.782	179.253	251.578	119.302	147.737	128.498	-0.634831	0.16626	3.81831	0.000134368	0.0021175
AT5G22450	245.838	277.703	264.247	357.906	353.817	326.426	0.386528	0.10125	-3.81755	0.000134784	0.00212237
AT1G21660	214.81	265.629	207.235	312.094	352.876	319.172	0.504923	0.132306	-3.81633	0.000135452	0.0021312
AT5G49900	48.9289	42.7235	63.347	111.667	75.2801	150.26	1.05009	0.275251	-3.81504	0.00013616	0.00214064
AT1G33720	52.5091	52.0112	45.2479	148.889	97.8641	94.3008	1.10776	0.290623	-3.81166	0.000138038	0.00216846
AT3G57550	125.306	124.455	119.454	182.293	207.961	165.804	0.578098	0.151705	-3.81068	0.000138587	0.00217535
AT3G22370	131.273	82.6606	92.3056	198.518	205.138	155.441	0.840656	0.220633	-3.81021	0.000138849	0.00217776
AT4G18570	300.734	279.56	361.078	211.88	226.781	196.892	-0.566288	0.148669	3.80906	0.000139495	0.00218616
AT1G58280	22.6744	21.3617	23.5289	48.6752	59.2831	42.4872	1.07947	0.283687	-3.80516	0.000141712	0.00221915
AT5G44568	52.5091	50.1536	32.5785	166.068	81.8671	99.4822	1.25151	0.328999	-3.80401	0.000142373	0.00222775
AT2G15890	1058.54	1020.72	1230.74	816.025	479.911	619.691	-0.775739	0.203953	3.80351	0.000142661	0.0022305
AT1G25425	42.962	34.3645	33.4834	114.53	74.3391	61.1401	1.10031	0.289398	-3.80205	0.000143501	0.00224187
AT1G26790	2.38678	0	9.95453	68.7179	20.702	36.2695	2.15163	0.566378	-3.79893	0.000145325	0.00226709
AT5G02120	434.393	425.377	346.599	613.689	605.064	562.696	0.551714	0.14523	-3.79889	0.000145344	0.00226709
AT3G05160	103.825	127.242	130.314	46.7663	82.8081	41.4509	-1.02724	0.270938	3.79144	0.000149777	0.0023344
AT3G18930	89.5041	103.094	124.884	59.1737	65.8701	62.1763	-0.754624	0.199137	3.78947	0.00015097	0.00235116
AT3G13080	252.998	192.256	137.553	337.863	357.581	293.265	0.745382	0.196907	-3.78545	0.000153431	0.00238762
AT3G15430	100.245	104.022	92.3056	150.798	137.386	143.006	0.527682	0.139457	-3.78384	0.000154425	0.00239932
AT4G18070	223.164	312.996	156.558	399.9	349.112	425.908	0.740523	0.195706	-3.78386	0.000154415	0.00239932
AT3G26810	301.927	306.495	267.867	230.968	208.902	184.457	-0.486109	0.12856	3.78119	0.000156081	0.00242315
AT3G20830	39.3818	24.1481	39.8181	10.4986	15.056	8.29018	-1.42924	0.378025	3.7808	0.000156323	0.00242503
AT4G00430	1006.03	944.56	938.441	1357.18	1293.88	1080.83	0.361727	0.0957267	-3.77875	0.000157619	0.00244322
AT4G27520	761.382	1334.64	679.623	1611.05	1754.03	1842.49	0.872975	0.2311	-3.77749	0.000158419	0.00245371
AT1G69530	1293.63	934.344	817.176	530.655	213.607	572.022	-1.13422	0.300322	3.77667	0.00015894	0.00245985
AT2G21130	48.9289	52.94	37.1032	100.214	76.2211	68.394	0.789203	0.209284	-3.77097	0.000162611	0.00251472
AT1G19450	322.215	374.295	176.467	510.612	571.188	618.655	0.922857	0.244803	-3.7698	0.00016338	0.00252444
AT2G45300	202.876	203.401	193.661	296.823	245.601	282.902	0.449813	0.119326	-3.76962	0.000163494	0.00252444
AT1G48750	26.2545	28.7919	17.1942	36.2678	57.4011	58.0313	1.00912	0.267804	-3.76812	0.000164483	0.00253388
AT1G64950	131.273	139.316	92.3056	170.84	207.961	214.508	0.693508	0.184047	-3.76811	0.000164488	0.00253388
AT2G17787	39.3818	40.8659	49.7726	15.2706	20.702	22.798	-1.09232	0.289869	3.76833	0.000164341	0.00253388
AT3G14595	204.069	204.33	135.744	331.182	262.539	387.566	0.822689	0.21839	-3.76706	0.000165182	0.0025426
AT4G04845	34.6083	42.7235	44.3429	23.8604	9.41001	11.399	-1.3363	0.354771	3.76665	0.000165452	0.00254479
AT1G51430	101.438	83.5894	60.6321	52.4928	30.112	32.1244	-1.03908	0.276016	3.76457	0.000166837	0.00256411
AT5G20190	379.497	609.274	338.454	761.623	970.172	676.686	0.827814	0.220121	-3.76072	0.000169426	0.00259987
AT5G43190	44.1554	41.7947	51.5826	17.1795	27.289	13.4715	-1.16433	0.309602	3.76072	0.000169426	0.00259987
AT1G72210	23.8678	30.6495	22.6239	53.4472	56.4601	55.9587	1.04251	0.277378	-3.75846	0.000170961	0.00262091
AT5G00880	28.6413	26.9344	25.3388	46.7663	63.0471	65.2852	1.04778	0.27879	-3.75832	0.000171061	0.00262091
AT2G33590	85.9239	67.8003	84.161	112.621	160.911	121.244	0.711248	0.189366	-3.75594	0.000172692	0.00264386
AT4G19860	387.851	343.645	266.057	188.974	216.43	194.819	-0.714536	0.190279	3.75521	0.000173196	0.00264953
AT1G11090	42.962	48.2961	30.7685	81.1253	74.3391	74.6116	0.878813	0.234054	-3.75475	0.000173513	0.00265234
AT1G76900	189.749	164.393	132.124	274.872	304.884	179.275	0.632783	0.168641	-3.75225	0.000175254	0.0026769
AT3G01060	352.049	358.506	319.45	462.891	526.961	558.551	0.57559	0.153462	-3.75071	0.000176336	0.00269136
AT5G13110	77.5702	104.022	90.4957	148.889	145.855	140.933	0.651471	0.173802	-3.74834	0.000178007	0.00271478
AT1G76600	16.7074	31.5782	18.0991	48.6752	76.2211	55.9587	1.31528	0.350954	-3.74773	0.000178443	0.00271935
AT3G03820	97.8578	38.0796	17.1942	15.2706	6.58701	15.5441	-1.66853	0.445852	3.74235	0.000182308	0.0027761
AT3G52720	94.2777	85.447	113.12	167.023	213.607	173.058	0.87644	0.234364	-3.73965	0.000184273	0.00280299
AT4G03110	211.23	234.05	219.905	309.23	332.173	305.7	0.496914	0.132881	-3.73954	0.000184355	0.00280299
AT4G11590	1.19339	2.78631	5.42974	15.2706	15.997	20.7254	1.91399	0.512441	-3.73506	0.000187674	0.00285127
AT5G47330	16.7074	195.042	31.6735	15.2706	17.879	17.6166	-1.82979	0.489987	3.73436	0.000188194	0.00285698
AT1G07640	82.3438	102.165	88.6858	53.4472	58.3421	50.7774	-0.737218	0.197436	3.73395	0.000188497	0.00285735
AT1G09350	51.3157	321.355	45.2479	840.84	514.728	712.955	1.81873	0.48708	-3.73394	0.000188505	0.00285735
AT4G29900	305.507	364.078	225.334	460.028	508.141	414.509	0.614718	0.164676	-3.73289	0.000189297	0.00286715
AT5G46910	76.3768	76.1592	66.9668	125.983	104.451	131.607	0.700871	0.187838	-3.73126	0.000190528	0.00288361
AT1G04230	99.0512	133.743	104.975	208.062	208.902	146.114	0.709968	0.190364	-3.72953	0.000191835	0.00290118
AT1G18890	114.565	142.102	99.5453	201.382	177.849	175.13	0.620504	0.166448	-3.72793	0.000193062	0.00291751
AT5G10860	651.59	544.26	474.198	425.669	407.454	346.115	-0.496978	0.133323	3.72762	0.0001933	0.00291888
AT4G25290	125.306	184.825	108.595	217.607	235.25	240.415	0.704749	0.18908	-3.72725	0.000193582	0.00292092
AT3G14350	315.054	373.366	314.925	442.849	522.256	447.67	0.482633	0.129523	-3.72624	0.000194356	0.00293039
AT2G07180	127.693	129.099	121.264	74.4444	80.9261	72.5391	-0.715319	0.192205	3.72164	0.000197931	0.00298202
AT4G34950	1354.5	1237.12	650.664	2429.94	1915.88	1747.16	0.872394	0.23444	-3.72119	0.000198289	0.00298516
AT5G42250	138.433	137.458	109.5	210.926	230.545	190.674	0.696526	0.187278	-3.7192	0.000199855	0.00300645
AT1G36730	496.449	543.331	380.082	372.222	284.182	324.353	-0.528995	0.142323	3.71685	0.00020172	0.0030322
AT3G13380	57.2826	55.7263	54.2974	123.12	92.2181	77.7204	0.780246	0.210011	-3.71526	0.000202994	0.00304905
AT3G20720	173.041	176.467	174.657	284.416	255.952	249.742	0.575593	0.155001	-3.71347	0.00020444	0.00306845
AT3G60740	163.494	171.823	151.128	126.937	107.274	100.518	-0.534899	0.144077	3.71258	0.000205157	0.00307689
AT5G03240	1237.54	1196.26	1190.02	1837.25	1503.72	1719.18	0.470542	0.126776	-3.7116	0.000205952	0.00308648
AT5G25210	44.1554	61.2989	47.0578	97.3503	93.1591	91.192	0.844688	0.227665	-3.71023	0.000207071	0.00310091
AT4G25210	165.881	179.253	142.078	277.735	237.132	224.871	0.587859	0.158477	-3.70942	0.000207738	0.00310857
AT2G23100	25.0611	16.7179	28.0537	53.4472	101.628	41.4509	1.35048	0.36444	-3.70563	0.000210864	0.00315278
AT4G36550	122.919	78.0168	124.884	192.792	159.97	195.856	0.72779	0.19641	-3.70546	0.000211011	0.00315278
AT2G04240	76.3768	84.5182	69.6817	54.4017	22.584	34.197	-1.00363	0.271094	3.70213	0.000213795	0.00319198
AT2G24220	47.7355	27.8631	39.8181	12.4074	17.879	18.6529	-1.14868	0.310361	3.70111	0.000214656	0.00320244
AT5G11110	33.4149	22.2905	38.0082	53.4472	73.3981	74.6116	1.0293	0.278215	-3.69965	0.000215895	0.00321851
AT5G03200	33.4149	36.2221	60.6321	19.0883	21.643	14.5078	-1.16057	0.313975	3.69638	0.000218692	0.00325776
AT3G01310	807.924	830.322	769.214	674.771	519.433	508.81	-0.499561	0.135182	3.69547	0.000219484	0.00326711
AT3G57930	59.6694	52.94	41.628	90.6694	163.734	98.4459	1.11758	0.302557	-3.69376	0.000220958	0.00328659
AT2G22800	40.5752	29.7207	32.5785	15.2706	8.46901	17.6166	-1.21108	0.327967	3.6927	0.000221888	0.00329795
AT3G10260	230.324	255.412	191.851	135.527	135.504	146.114	-0.685919	0.185784	3.69202	0.000222483	0.00330432
AT1G68580	224.357	235.908	182.801	313.048	377.342	284.975	0.588759	0.159478	-3.6918	0.000222674	0.00330469
AT4G27720	348.469	494.106	310.4	617.507	675.639	689.121	0.756361	0.204906	-3.69126	0.000223146	0.00330923
AT3G04870	266.126	360.363	261.533	471.481	434.743	393.784	0.535147	0.14508	-3.68865	0.000225451	0.00334091
AT5G17170	433.2	380.796	180.991	616.552	602.241	547.152	0.801954	0.217574	-3.68588	0.000227911	0.00337485
AT1G21130	2143.32	1060.66	1325.76	2942.46	2429.67	2268.4	0.727549	0.197452	-3.68469	0.000228982	0.00338818
AT1G29340	231.517	265.629	203.615	331.182	348.17	381.348	0.584461	0.158649	-3.68398	0.000229622	0.00339513
AT2G37678	64.443	71.5154	48.8677	32.4501	20.702	38.3421	-0.97216	0.263934	3.68334	0.000230196	0.00339897
AT2G42790	227.937	211.76	140.268	117.393	137.386	89.1194	-0.72924	0.197985	3.68331	0.000230224	0.00339897
AT1G08930	616.982	430.95	416.28	850.384	1094.38	768.914	0.853638	0.231777	-3.68301	0.000230493	0.00340041
AT3G02150	75.1834	89.162	80.5412	201.382	112.92	133.679	0.830774	0.225748	-3.68009	0.000233152	0.00343454
AT4G23190	31.0281	22.2905	32.5785	92.5783	65.8701	66.3214	1.26239	0.343033	-3.68009	0.000233151	0.00343454
AT1G78440	8.35372	2.78631	9.95453	30.5413	40.4631	19.6892	1.76238	0.479282	-3.67713	0.000235871	0.00347202
AT1G78590	84.7306	73.3729	64.252	159.387	111.038	105.7	0.73952	0.201135	-3.67673	0.000236241	0.00347489
AT3G26240	95.471	91.0196	115.835	55.3561	63.0471	45.596	-0.857415	0.233284	3.67542	0.00023746	0.00349023
AT1G62300	57.2826	50.1536	45.2479	131.709	104.451	63.2126	0.929412	0.25293	-3.67459	0.000238235	0.00349905
AT4G15420	78.7636	82.6606	74.2065	154.615	108.215	116.063	0.663235	0.180563	-3.67315	0.000239579	0.00351618
AT3G19450	196.909	228.478	179.182	354.088	337.819	308.809	0.703396	0.191559	-3.67195	0.00024071	0.00352757
AT5G15230	594.307	567.479	699.532	484.843	356.64	337.825	-0.653611	0.177997	3.67203	0.000240634	0.00352757
AT4G24960	47.7355	416.09	61.5371	924.828	580.598	773.059	1.73367	0.472448	-3.66954	0.000242984	0.00355815
AT5G15537	29.8347	27.8631	38.0082	13.3618	13.174	13.4715	-1.18144	0.321975	3.66936	0.000243154	0.00355815
AT4G16880	96.6644	86.3757	84.161	157.478	165.616	116.063	0.699489	0.190662	-3.66874	0.000243752	0.00356427
AT5G11070	137.24	148.603	126.694	202.336	332.173	334.716	1.01628	0.277095	-3.66762	0.000244818	0.00357722
AT2G02455	26.2545	51.0824	47.9627	76.3532	82.8081	80.8293	0.877406	0.239391	-3.66516	0.000247185	0.0036065
AT4G38420	64.443	100.307	74.2065	169.886	151.501	119.171	0.838816	0.228859	-3.66521	0.000247138	0.0036065
AT4G14750	58.476	55.7263	64.252	27.678	40.4631	26.9431	-0.874917	0.238793	3.66391	0.000248391	0.00362144
AT1G04910	161.107	177.395	144.793	123.12	110.097	108.809	-0.496543	0.135535	3.66358	0.000248715	0.0036235
AT5G46800	344.889	373.366	196.376	508.703	519.433	482.903	0.706329	0.192821	-3.66314	0.000249144	0.0036271
AT5G47960	2.38678	3.71509	1.80991	15.2706	16.938	11.399	1.87448	0.511761	-3.6628	0.000249472	0.00362921
AT1G04250	190.942	188.541	108.595	287.279	245.601	259.068	0.683897	0.186794	-3.66124	0.000251002	0.0036488
AT3G45230	75.1834	52.94	57.0123	37.2222	27.289	25.9068	-0.980897	0.268074	3.65905	0.000253152	0.00367737
AT3G43670	343.696	221.976	218.095	148.889	161.852	154.405	-0.730107	0.199669	3.65658	0.000255603	0.00370755
AT4G22880	20.2876	17.6467	14.4793	38.1766	67.7521	64.2489	1.46756	0.401337	-3.65668	0.000255501	0.00370755
AT5G58650	52.5091	29.7207	38.9132	87.8062	124.212	63.2126	1.1119	0.304278	-3.65421	0.000257971	0.00373775
AT5G64310	59.6694	79.8743	77.8263	105.94	201.374	125.389	0.940004	0.257245	-3.65412	0.000258061	0.00373775
AT1G52040	294.767	825.678	351.123	184.202	256.893	203.109	-1.11084	0.304163	3.65211	0.000260094	0.00376444
AT1G20640	198.102	196.9	165.607	139.345	125.153	125.389	-0.518505	0.142025	3.65081	0.000261419	0.00378087
AT3G05320	34.6083	26.9344	35.2933	43.9031	107.274	98.4459	1.25462	0.343842	-3.64884	0.000263429	0.00380717
AT1G01420	46.5421	83.5894	38.0082	107.849	113.861	118.135	0.958133	0.262744	-3.64664	0.000265687	0.00383424
AT1G48650	313.861	328.785	292.301	397.991	383.929	437.307	0.37485	0.102793	-3.64664	0.000265688	0.00383424
AT1G44100	116.952	110.524	64.252	157.478	322.763	161.659	1.06967	0.293361	-3.64625	0.00026609	0.00383726
AT1G54217	19.0942	15.7891	18.0991	50.584	28.23	46.6323	1.14651	0.31447	-3.64585	0.000266513	0.00384057
AT1G73805	71.6033	58.5126	59.7272	143.162	106.333	116.063	0.902398	0.247543	-3.64542	0.000266958	0.0038442
AT3G24840	38.1884	30.6495	41.628	102.122	78.1031	80.8293	1.14273	0.313553	-3.64446	0.000267958	0.00385581
AT3G08720	46.5421	61.2989	35.2933	86.8518	96.9231	81.8655	0.857203	0.235257	-3.64368	0.000268767	0.00386184
AT4G15670	15.514	15.7891	7.23966	65.8546	19.761	48.7048	1.55776	0.42751	-3.64381	0.000268636	0.00386184
AT3G14890	44.1554	87.3045	65.1569	164.159	108.215	155.441	1.03868	0.285121	-3.64296	0.000269526	0.00386995
AT1G09750	400.978	236.837	373.747	154.615	229.604	188.602	-0.797246	0.21889	3.64222	0.000270301	0.00387828
AT1G58290	3234.08	2938.63	1621.68	4468.57	3874.1	4640.43	0.71621	0.196843	-3.63848	0.000274248	0.00392924
AT5G09660	2514.47	2670.22	1792.72	3504.61	3713.19	3068.4	0.548551	0.15076	-3.63856	0.000274169	0.00392924
AT5G36910	233.904	199.686	204.52	393.219	355.699	328.498	0.729612	0.20054	-3.63823	0.000274518	0.00393028
AT4G34740	217.197	180.182	161.987	305.413	238.073	315.027	0.605286	0.166466	-3.6361	0.000276801	0.00396011
AT2G26030	45.3487	65.014	56.1073	20.9971	29.171	32.1244	-0.982197	0.270163	3.63558	0.000277361	0.00396241
AT4G30470	95.471	117.954	57.9173	138.39	213.607	137.824	0.824242	0.226711	-3.63565	0.000277277	0.00396241
AT1G10960	452.294	599.057	480.532	820.797	950.411	892.231	0.768759	0.211712	-3.63114	0.000282167	0.00402818
AT5G18130	295.96	187.612	191.851	78.262	138.327	55.9587	-1.20436	0.331743	3.6304	0.000282988	0.00403699
AT1G74890	39.3818	39.0084	43.4379	163.205	54.5781	74.6116	1.16229	0.320418	-3.62741	0.000286279	0.00408102
AT3G49220	502.416	1096.88	638.9	1465.98	1232.71	1149.23	0.752882	0.207593	-3.62672	0.000287039	0.00408891
AT4G32480	13.1273	26.0056	46.1528	5.72649	9.41001	7.25391	-1.66018	0.457853	3.62601	0.000287834	0.00409731
AT1G36622	1.19339	7.43017	1.80991	26.7236	15.997	15.5441	1.87471	0.517205	-3.6247	0.000289295	0.00411516
AT1G61730	128.886	133.743	126.694	215.698	159.029	195.856	0.535318	0.147699	-3.62438	0.000289659	0.00411738
AT1G78100	163.494	144.888	105.88	195.655	470.501	278.757	1.1082	0.305928	-3.62243	0.00029185	0.0041426
AT3G44340	365.177	377.081	374.652	300.641	276.654	304.664	-0.346369	0.0956138	3.62259	0.000291671	0.0041426
AT3G08505	29.8347	25.0768	35.2933	56.3105	48.9321	65.2852	0.869008	0.239977	-3.62122	0.000293219	0.00415906
AT3G22830	0	2.78631	4.52479	15.2706	18.82	17.6166	1.95024	0.538593	-3.621	0.00029347	0.00415966
AT3G07730	20.2876	16.7179	26.2438	4.77208	4.70501	7.25391	-1.62622	0.449199	3.62026	0.000294303	0.00416849
AT4G32060	612.208	585.126	526.685	816.979	728.335	810.365	0.442331	0.122197	-3.61982	0.000294803	0.00416963
AT5G52580	239.871	267.486	208.14	346.453	306.766	335.752	0.457735	0.126451	-3.61986	0.000294757	0.00416963
AT1G01240	200.489	160.677	105.88	92.5783	97.8641	75.6479	-0.780461	0.215843	3.61587	0.000299345	0.00423086
AT2G23910	7.16033	9.28771	9.95453	39.131	14.115	29.0156	1.37805	0.381426	-3.61289	0.000302804	0.0042767
AT4G24350	239.871	444.881	306.78	195.655	191.964	189.638	-0.763039	0.211241	3.61217	0.000303642	0.00428549
AT4G29740	78.7636	93.8059	72.3966	188.02	117.625	159.586	0.883268	0.244618	-3.61081	0.000305247	0.00430509
AT3G18050	639.656	521.969	704.962	478.162	337.819	410.364	-0.603229	0.167174	3.60838	0.000308113	0.00434243
AT3G12980	243.451	312.067	269.677	412.307	350.994	352.333	0.42079	0.1167	-3.60576	0.000311241	0.00438341
AT1G49210	3.58016	5.57263	4.52479	33.4045	10.351	11.399	1.60824	0.446273	-3.60373	0.000313687	0.00441473
AT4G05070	627.722	450.454	448.859	1016.45	746.214	850.78	0.747606	0.207657	-3.6002	0.000317968	0.0044718
AT4G04075	8.35372	8.35894	11.7644	26.7236	31.994	31.0882	1.44487	0.401624	-3.59758	0.000321196	0.004514
AT5G52550	115.759	108.666	133.934	58.2193	90.3361	67.3577	-0.716589	0.199367	3.59432	0.000325239	0.0045676
AT1G62750	2459.57	2619.13	1528.47	3083.71	3327.38	3672.55	0.598693	0.166683	-3.5918	0.0003284	0.00460641
AT5G35970	1037.05	1357.86	961.064	1612.01	1782.26	1707.78	0.590362	0.164366	-3.59175	0.000328467	0.00460641
AT3G54810	257.772	246.124	228.954	355.042	806.438	320.208	0.960437	0.267576	-3.5894	0.000331443	0.00464487
AT5G54520	29.8347	34.3645	35.2933	14.3162	12.233	13.4715	-1.22272	0.340744	3.58837	0.000332749	0.00465989
AT3G18035	420.073	443.024	619.896	399.9	329.35	275.648	-0.564109	0.157515	3.5813	0.000341887	0.00478449
AT4G38932	119.339	124.455	84.161	59.1737	59.2831	50.7774	-0.911549	0.254762	3.57805	0.000346173	0.00484106
AT5G47880	158.721	181.11	118.549	220.47	263.48	203.109	0.572765	0.16011	-3.57732	0.000347141	0.00485106
AT5G59030	258.965	237.765	282.347	439.985	343.465	354.405	0.530072	0.148183	-3.57714	0.000347376	0.00485106
AT3G44735	50.1223	58.5126	95.0205	134.573	143.973	115.026	0.888597	0.248473	-3.57623	0.000348583	0.0048645
AT2G04040	53.7025	37.1509	42.533	70.6267	93.1591	66.3214	0.769402	0.215184	-3.57556	0.000349478	0.00487014
AT2G24755	274.479	262.842	301.351	211.88	222.076	177.203	-0.457608	0.127977	3.57571	0.000349273	0.00487014
AT1G44000	428.426	498.75	407.231	689.088	607.887	666.323	0.543293	0.151964	-3.57514	0.000350043	0.00487461
AT1G58590	41.7686	36.2221	39.8181	102.122	54.5781	77.7204	0.935049	0.261557	-3.57493	0.000350321	0.00487506
AT2G33170	121.726	123.527	124.884	71.5811	78.1031	90.1557	-0.620482	0.17367	3.57276	0.000353239	0.00491223
AT5G20630	815.084	1446.1	1910.36	652.82	590.949	824.873	-0.965354	0.27026	3.57194	0.000354343	0.00492413
AT1G19770	293.573	225.691	285.966	369.359	679.403	674.613	1.03138	0.288841	-3.57077	0.000355939	0.00494286
AT4G28730	50.1223	57.5838	55.2024	111.667	85.6311	98.4459	0.816037	0.228651	-3.56892	0.00035845	0.00497425
AT4G03400	354.436	423.52	326.69	673.817	985.228	452.851	0.888802	0.249114	-3.56785	0.000359921	0.00499118
AT5G46170	158.721	111.453	128.504	90.6694	82.8081	91.192	-0.576438	0.161636	3.56626	0.000362107	0.00501798
AT3G08595	9.5471	8.35894	12.6694	0	0.941001	2.07254	-1.99405	0.559405	3.56459	0.000364428	0.00504663
AT1G74750	54.8958	39.0084	56.1073	104.986	79.9851	79.793	0.785447	0.220576	-3.56089	0.000369597	0.00511464
AT1G79160	83.5372	129.099	112.215	70.6267	46.1091	62.1763	-0.8385	0.235517	3.56026	0.000370492	0.00512346
AT4G25520	120.532	139.316	142.078	209.017	178.79	216.581	0.567053	0.159484	-3.55554	0.000377203	0.00521264
AT2G37460	79.957	55.7263	45.2479	146.025	122.33	111.917	1.01291	0.285004	-3.55401	0.000379411	0.00523952
AT5G15730	62.0562	52.94	63.347	103.077	90.3361	93.2645	0.6647	0.187219	-3.55039	0.000384663	0.00530494
AT5G58770	27.4479	19.5042	26.2438	40.0854	90.3361	59.0675	1.24955	0.351949	-3.55037	0.000384683	0.00530494
AT2G24630	106.212	102.165	87.7808	60.1281	65.8701	48.7048	-0.73716	0.207688	3.54936	0.000386162	0.00532164
AT3G50750	174.235	167.179	135.744	112.621	78.1031	83.9381	-0.774277	0.218192	3.5486	0.000387281	0.00533337
AT3G26650	7647.23	6832.97	3583.63	9910.65	10352.9	10452.9	0.742627	0.209291	-3.5483	0.000387734	0.0053359
AT2G39870	156.334	52.94	141.173	266.282	320.881	188.602	1.06744	0.30091	-3.54737	0.000389094	0.00534721
AT5G03080	77.5702	80.8031	47.9627	129.8	112.92	107.772	0.744073	0.209752	-3.54739	0.000389067	0.00534721
AT2G01890	36.995	104.022	84.161	239.558	139.268	188.602	1.20779	0.340498	-3.54712	0.00038946	0.00534855
AT5G24300	590.727	738.373	502.251	773.076	855.37	889.122	0.451637	0.127474	-3.54297	0.00039565	0.00542981
AT1G80650	51.3157	77.088	76.9214	42.9487	32.935	30.0519	-0.925922	0.261393	3.54226	0.000396721	0.00544075
AT1G72510	179.008	182.039	170.132	116.439	142.091	65.2852	-0.69658	0.196705	3.54125	0.000398243	0.00545785
AT3G52480	25.0611	22.2905	20.814	4.77208	8.46901	10.3627	-1.36349	0.385133	3.54032	0.000399649	0.00547335
AT1G07150	9.5471	10.2165	10.8595	22.906	34.817	33.1607	1.40106	0.396034	-3.53773	0.000403581	0.00552339
AT3G01540	582.373	599.057	533.925	823.66	678.462	711.919	0.360461	0.101969	-3.53502	0.000407741	0.00557648
AT1G67310	202.876	269.344	196.376	334.045	297.356	317.099	0.490499	0.138853	-3.5325	0.000411656	0.00562615
AT1G56010	65.6363	65.014	44.3429	18.1339	24.466	34.197	-1.10307	0.312305	3.53202	0.000412393	0.00562848
AT4G16520	476.162	451.383	357.458	343.589	302.061	268.395	-0.4867	0.137792	3.53214	0.000412207	0.00562848
AT5G01340	9.5471	14.8603	12.6694	21.9515	36.6991	32.1244	1.14746	0.324971	-3.53096	0.000414054	0.00564728
AT1G16080	435.587	462.528	266.057	541.153	672.816	632.126	0.651063	0.184465	-3.52946	0.000416405	0.00567545
AT4G14430	96.6644	109.595	90.4957	64.9002	60.2241	66.3214	-0.625042	0.177108	3.52915	0.000416891	0.00567818
AT5G05305	1.19339	2.78631	2.71487	22.906	12.233	33.1607	2.09744	0.594804	-3.52627	0.00042146	0.00573648
AT5G10460	70.4099	83.5894	78.7313	123.12	112.92	127.462	0.61662	0.174969	-3.52416	0.00042483	0.00577839
AT5G66560	156.334	132.814	158.367	104.986	106.333	83.9381	-0.591602	0.167945	3.52259	0.000427345	0.00580861
AT5G64190	50.1223	26.9344	31.6735	12.4074	15.056	13.4715	-1.27856	0.363282	3.51948	0.0004324	0.00587331
AT5G55790	121.726	144.888	87.7808	50.584	62.1061	58.0313	-0.993847	0.282631	3.51642	0.000437413	0.00593734
AT3G13530	225.55	260.056	261.533	352.179	430.038	319.172	0.542785	0.154402	-3.51539	0.000439105	0.00595624
AT5G17230	1071.66	1068.09	704.057	1394.4	1310.81	1422.8	0.528322	0.150462	-3.51134	0.000445857	0.00604371
AT1G28320	155.14	169.036	172.847	125.983	108.215	116.063	-0.507708	0.144769	3.50703	0.000453144	0.0061383
AT3G05870	33.4149	39.0084	38.0082	83.0341	86.5721	71.5028	1.04129	0.297088	-3.50497	0.00045665	0.00618158
AT4G12720	159.914	176.467	105.88	218.561	297.356	190.674	0.661482	0.18876	-3.50435	0.00045773	0.00619198
AT2G03480	88.3107	72.4442	74.2065	126.937	118.566	106.736	0.575812	0.164395	-3.50261	0.000460725	0.00622675
AT3G53000	58.476	85.447	60.6321	132.664	93.1591	111.917	0.690787	0.197227	-3.50249	0.000460927	0.00622675
AT2G21620	395.011	360.363	204.52	674.771	440.389	533.68	0.753504	0.215309	-3.49965	0.000465874	0.0062893
AT3G05660	13.1273	65.9428	33.4834	125.983	99.7461	66.3214	1.22406	0.349832	-3.49898	0.000467034	0.00630068
AT2G22200	17.9008	39.0084	34.3884	4.77208	11.292	10.3627	-1.54052	0.440713	3.49552	0.000473132	0.00637861
AT5G15090	463.035	389.155	321.26	540.199	544.84	492.229	0.423816	0.121268	-3.49486	0.000474317	0.00639025
AT1G12020	41.7686	60.3701	67.8718	37.2222	26.348	30.0519	-0.845572	0.242016	3.49387	0.000476079	0.00640098
AT2G17880	51.3157	56.655	56.1073	33.4045	26.348	26.9431	-0.894517	0.256015	3.494	0.000475835	0.00640098
AT2G20370	125.306	142.102	128.504	181.339	199.492	197.928	0.531083	0.151997	-3.49404	0.000475769	0.00640098
AT5G42310	255.385	261.913	202.71	319.729	344.406	333.68	0.464085	0.132866	-3.49288	0.000477833	0.00642021
AT5G64300	266.126	260.056	290.491	376.994	329.35	353.369	0.364311	0.10431	-3.49259	0.000478359	0.00642294
AT2G47060	101.438	117.954	80.5412	137.436	208.902	208.291	0.850546	0.24363	-3.49114	0.000480959	0.00645349
AT5G25070	109.792	132.814	104.07	60.1281	60.2241	82.9018	-0.752716	0.215625	3.49086	0.000481473	0.00645603
AT3G22104	132.466	186.683	138.458	111.667	83.7491	105.7	-0.601671	0.172473	3.4885	0.000485734	0.00650877
AT1G73200	115.759	133.743	126.694	169.886	227.722	179.275	0.597386	0.171264	-3.48809	0.000486476	0.00651432
AT1G16130	1.19339	0.928771	14.4793	35.3134	56.4601	22.798	1.95699	0.561291	-3.48658	0.000489233	0.00654683
AT1G78310	21.481	18.5754	25.3388	60.1281	38.5811	46.6323	1.07112	0.307316	-3.48541	0.000491381	0.00656702
AT3G50840	146.787	129.099	107.69	82.0797	66.8111	58.0313	-0.854644	0.245207	3.4854	0.000491403	0.00656702
AT4G34610	146.787	169.965	155.653	219.515	267.244	211.4	0.546811	0.156955	-3.48387	0.00049422	0.00660023
AT1G28130	83.5372	77.088	66.9668	127.892	143.032	133.679	0.799571	0.229979	-3.47671	0.000507607	0.00677446
AT3G14770	99.0512	152.318	89.5908	248.148	150.56	226.944	0.834076	0.239963	-3.47585	0.00050923	0.00679156
AT2G01940	44.1554	63.1564	72.3966	38.1766	29.171	16.5804	-1.0375	0.29905	3.46931	0.000521793	0.00695444
AT1G09863	85.9239	78.0168	72.3966	133.618	134.563	115.026	0.678104	0.195502	-3.46853	0.00052331	0.00696998
AT2G16750	50.1223	73.3729	42.533	21.9515	23.525	33.1607	-1.01971	0.294053	3.46776	0.00052481	0.00698528
AT3G62420	276.866	289.777	240.719	418.034	578.716	374.094	0.73628	0.212348	-3.46733	0.000525651	0.00699179
AT3G17185	35.8016	49.2249	62.442	95.4415	76.2211	102.591	0.835139	0.24103	-3.46488	0.000530472	0.0070512
AT5G11060	365.177	384.511	379.177	320.683	279.477	232.125	-0.441268	0.127366	3.46457	0.000531074	0.00705448
AT1G58420	4.77355	5.57263	2.71487	20.0427	12.233	17.6166	1.62877	0.471111	-3.4573	0.000545614	0.00723838
AT4G25640	371.144	353.862	165.607	573.603	479.911	513.991	0.786804	0.227579	-3.45729	0.000545647	0.00723838
AT1G55690	147.98	198.757	142.983	323.547	207.02	231.089	0.614266	0.177847	-3.45389	0.000552558	0.00732518
AT5G63470	206.456	193.184	146.603	141.253	86.5721	79.793	-0.800796	0.232268	3.44773	0.000565319	0.00748935
AT3G52740	52.5091	40.8659	36.1983	93.5327	81.8671	88.0832	0.969111	0.281121	-3.44731	0.000566203	0.00749606
AT4G31870	17.9008	15.7891	11.7644	47.7208	43.2861	24.8705	1.22062	0.354182	-3.44631	0.000568305	0.00751888
AT4G16955	66.8297	101.236	38.0082	129.8	125.153	128.498	0.856311	0.248596	-3.44459	0.000571925	0.00756174
AT2G24550	127.693	128.17	60.6321	51.5384	53.6371	44.5597	-1.0124	0.29397	3.44388	0.000573421	0.00757647
AT3G03250	532.251	470.887	484.152	765.441	701.046	729.536	0.547348	0.15898	-3.44288	0.000575555	0.00759962
AT3G62695	10.7405	9.28771	5.42974	32.4501	21.643	27.9794	1.47312	0.428022	-3.44168	0.000578117	0.00762838
AT4G31820	307.894	307.423	312.21	227.151	219.253	220.726	-0.475067	0.138085	3.44039	0.000580868	0.0076596
AT2G18915	113.372	97.521	90.4957	171.795	143.973	129.534	0.555761	0.161628	-3.43852	0.000584893	0.00770756
AT1G20980	422.459	411.446	336.644	512.521	521.315	462.178	0.351112	0.102143	-3.43745	0.000587229	0.007733
AT1G65370	72.7967	62.2277	77.8263	44.8575	31.994	33.1607	-0.910823	0.264984	3.43727	0.000587603	0.007733
AT3G62110	381.884	254.483	246.148	188.974	159.029	215.545	-0.631099	0.183746	3.43464	0.000593351	0.00780349
AT4G35250	574.02	643.638	444.334	833.204	877.013	809.329	0.585969	0.170668	-3.43339	0.00059608	0.00783419
AT5G09855	73.9901	101.236	16.2892	142.208	242.778	205.182	1.41878	0.413467	-3.43143	0.0006004	0.00788575
AT1G07790	176.621	181.11	156.558	302.55	249.365	203.109	0.539989	0.157552	-3.42736	0.000609478	0.00799442
AT1G63850	126.499	135.601	110.405	190.883	163.734	170.985	0.486173	0.141843	-3.42753	0.00060909	0.00799442
AT1G19110	261.352	286.99	278.727	391.31	337.819	326.426	0.340811	0.0994572	-3.4267	0.000610954	0.0080085
AT2G15970	1907.03	3205.19	2340.22	3805.25	3504.29	3473.59	0.519578	0.151676	-3.42558	0.000613491	0.00803116
AT5G06220	309.088	425.377	313.115	530.655	451.681	463.214	0.451461	0.13179	-3.42561	0.000613411	0.00803116
AT4G11330	126.499	113.31	91.4007	182.293	159.029	139.897	0.534487	0.156089	-3.42424	0.000616527	0.00806558
AT3G11700	505.997	549.833	612.656	765.441	998.402	693.266	0.541338	0.158215	-3.42152	0.000622719	0.00814123
AT1G72755	100.245	82.6606	78.7313	125.983	137.386	120.208	0.547558	0.160071	-3.42073	0.00062454	0.00815431
AT5G21482	84.7306	81.7319	47.9627	115.484	179.731	110.881	0.881907	0.257811	-3.42074	0.000624501	0.00815431
AT2G37040	458.261	587.912	238.004	766.395	713.279	772.023	0.781422	0.228579	-3.41861	0.000629428	0.00820734
AT5G13630	13617.8	13891.6	8767.22	16802.5	20078.1	20286.1	0.64011	0.187234	-3.41876	0.000629068	0.00820734
AT5G18100	114.565	140.244	140.268	93.5327	85.6311	90.1557	-0.556579	0.162922	3.41623	0.000634952	0.00827394
AT4G08950	66.8297	94.7347	90.4957	112.621	955.116	237.306	1.79222	0.525104	-3.41308	0.000642332	0.00835915
AT5G08720	103.825	141.173	103.165	180.384	169.38	168.912	0.555968	0.16289	-3.41315	0.000642159	0.00835915
AT1G22910	164.688	180.182	168.322	113.575	137.386	119.171	-0.471352	0.138176	3.41125	0.000646653	0.00840438
AT1G50020	245.838	242.409	189.136	294.914	338.76	324.353	0.493089	0.144541	-3.41141	0.000646284	0.00840438
AT1G52190	1026.31	768.094	538.449	535.427	516.61	460.105	-0.611911	0.179425	3.4104	0.000648678	0.00842518
AT4G17670	35.8016	20.433	27.1487	70.6267	102.569	48.7048	1.26673	0.371461	-3.41013	0.000649314	0.00842794
AT1G65590	373.53	322.284	350.218	297.777	255.952	231.089	-0.414007	0.121531	3.40658	0.000657818	0.00853274
AT2G24240	108.598	89.162	62.442	163.205	144.914	127.462	0.727208	0.213595	-3.40462	0.00066257	0.00858877
AT1G68840	491.676	367.793	369.222	128.846	248.424	200.001	-1.01999	0.299683	3.40357	0.000665125	0.00861336
AT2G46600	226.744	162.535	74.2065	427.578	328.409	315.027	1.11343	0.327144	-3.40348	0.000665334	0.00861336
AT2G19310	99.0512	77.088	65.1569	52.4928	48.9321	29.0156	-0.840046	0.24686	3.40292	0.000666686	0.00862526
AT2G35420	15.514	16.7179	16.2892	5.72649	1.882	3.10882	-1.70418	0.500918	3.40211	0.000668682	0.00863982
AT5G05730	229.131	420.733	220.81	191.837	145.855	189.638	-0.70654	0.207676	3.40213	0.000668636	0.00863982
AT5G36925	3.58016	12.074	8.14461	35.3134	31.053	33.1607	1.68669	0.496042	-3.4003	0.000673113	0.00869143
AT4G33467	36.995	82.6606	18.0991	217.607	106.333	163.731	1.54631	0.455007	-3.39842	0.000677757	0.00874571
AT5G02290	184.975	139.316	152.033	213.789	263.48	206.218	0.515482	0.151727	-3.39744	0.000680191	0.00877142
AT3G07310	335.342	330.643	262.438	233.832	199.492	206.218	-0.531099	0.156493	3.39376	0.0006894	0.00888441
AT2G39900	173.041	146.746	150.223	120.256	112.92	94.3008	-0.51189	0.150918	3.39184	0.000694244	0.00894104
AT1G18330	159.914	168.108	187.326	297.777	231.486	236.27	0.551021	0.162509	-3.39071	0.00069712	0.00897226
AT5G66770	75.1834	72.4442	95.0205	47.7208	41.4041	56.995	-0.721018	0.21274	3.38921	0.000700954	0.00901577
AT1G56540	26.2545	15.7891	37.1032	57.2649	73.3981	58.0313	1.14706	0.338753	-3.38613	0.000708852	0.00911145
AT2G32150	118.145	227.549	162.892	84.9429	109.156	75.6479	-0.881093	0.260265	3.38537	0.000710822	0.00913086
AT1G20920	95.471	95.6634	107.69	59.1737	54.5781	49.7411	-0.840274	0.248349	3.38345	0.000715825	0.00918919
AT3G10020	22.6744	38.0796	24.4338	5.72649	12.233	6.21763	-1.53835	0.4548	3.38248	0.000718351	0.00921567
AT1G04550	59.6694	77.088	76.9214	110.712	111.038	100.518	0.563147	0.166584	-3.38056	0.000723393	0.00927436
AT2G08740	20.2876	10.2165	13.5744	33.4045	38.5811	24.8705	1.06885	0.31626	-3.37967	0.000725742	0.00929848
AT3G63215	44.1554	28.7919	28.0537	18.1339	12.233	10.3627	-1.17696	0.348447	3.37772	0.000730907	0.00935862
AT1G01500	115.759	114.239	109.5	211.88	157.147	165.804	0.634036	0.187767	-3.37672	0.000733548	0.00938639
AT3G07835	50.1223	110.524	33.4834	135.527	224.899	115.026	1.17588	0.348392	-3.37517	0.000737712	0.0094336
AT3G44020	73.9901	83.5894	71.4916	125.983	104.451	116.063	0.576543	0.170832	-3.37491	0.000738395	0.00943626
AT1G70730	421.266	466.243	319.45	501.068	612.592	566.841	0.470468	0.139418	-3.37451	0.000739482	0.00944408
AT5G04140	4336.77	5363.65	3079.57	5564.24	6885.31	6740.95	0.575224	0.17048	-3.37415	0.000740448	0.00945034
AT1G53700	26.2545	14.8603	20.814	4.77208	1.882	8.29018	-1.63294	0.484108	3.37309	0.000743298	0.00947454
AT1G80630	65.6363	41.7947	42.533	22.906	31.994	19.6892	-0.935563	0.277349	3.37323	0.000742921	0.00947454
AT1G08315	41.7686	42.7235	44.3429	26.7236	17.879	18.6529	-0.970502	0.287774	3.37245	0.000745036	0.00948927
AT5G23280	311.474	267.486	277.822	229.06	223.958	157.513	-0.483759	0.14345	3.37231	0.000745408	0.00948927
AT4G13550	133.659	117.954	130.314	167.977	223.017	192.747	0.59552	0.176606	-3.37203	0.000746175	0.00949296
AT3G47500	328.182	420.733	361.078	721.538	500.613	511.919	0.619774	0.183851	-3.37106	0.000748785	0.00952007
AT4G04450	13.1273	5.57263	16.2892	40.0854	26.348	37.3058	1.37488	0.407961	-3.37012	0.000751351	0.00954658
AT5G65140	29.8347	51.0824	31.6735	84.9429	68.6931	64.2489	0.892728	0.265012	-3.36864	0.000755413	0.00959206
AT3G45960	2.38678	1.85754	4.52479	11.453	25.407	14.5078	1.83578	0.545088	-3.36786	0.000757549	0.00961304
AT1G22110	7.16033	0.928771	6.3347	14.3162	22.584	21.7617	1.61939	0.480909	-3.36735	0.000758953	0.00961857
AT5G22390	107.405	87.3045	81.4461	191.837	147.737	135.752	0.756214	0.224563	-3.3675	0.000758538	0.00961857
AT5G64370	163.494	136.529	119.454	78.262	98.8051	92.2283	-0.621745	0.184678	3.36665	0.000760867	0.00963668
AT2G46490	171.848	135.601	105.88	105.94	65.8701	39.3784	-0.918869	0.272987	3.36598	0.000762735	0.00965418
AT1G25230	186.169	226.62	201.805	157.478	106.333	123.316	-0.658558	0.195668	3.3657	0.0007635	0.00965771
AT5G19140	4067.07	2948.85	3578.2	2691.45	2456.01	2169.95	-0.531906	0.15809	3.36458	0.000766594	0.00969068
AT3G56360	17.9008	91.0196	80.5412	12.4074	16.938	17.6166	-1.60554	0.477618	3.36155	0.000775069	0.0097916
AT1G13440	4732.98	3365.87	2304.02	5286.5	5163.27	5276.7	0.582602	0.17338	-3.36026	0.000778704	0.00983126
ATMG00380	14.3207	10.2165	18.0991	22.906	31.994	49.7411	1.16282	0.346081	-3.35995	0.000779563	0.00983586
AT2G17220	110.985	79.8743	94.1155	144.117	153.383	129.534	0.575662	0.171395	-3.35868	0.000783143	0.00987476
AT3G59820	93.0843	104.022	98.6403	211.88	103.51	178.239	0.704123	0.209699	-3.35778	0.000785723	0.009901
AT1G70810	65.6363	64.0852	32.5785	100.214	96.9231	122.28	0.930152	0.277167	-3.35592	0.00079101	0.009955
AT2G46330	418.879	324.141	636.185	264.373	271.949	218.653	-0.843014	0.251202	3.35593	0.000790997	0.009955
AT4G16400	386.658	366.865	206.33	561.196	447.917	471.504	0.61151	0.182378	-3.35299	0.000799447	0.0100548
AT1G03220	276.866	202.472	180.991	313.048	395.221	349.224	0.663284	0.19801	-3.34974	0.000808861	0.0101668
AT3G48580	8.35372	19.5042	36.1983	3.81766	5.64601	6.21763	-1.62396	0.485113	3.34758	0.000815196	0.0102399
AT3G12150	136.046	116.096	115.835	63.9458	71.5161	77.7204	-0.762215	0.22777	3.34642	0.000818623	0.0102765
AT3G04730	630.109	639.923	547.499	534.472	405.572	354.405	-0.488067	0.145871	3.34589	0.000820189	0.0102897
AT3G45600	225.55	188.541	158.367	363.632	294.533	221.762	0.604619	0.180787	-3.34437	0.000824698	0.0103397
AT5G66558	151.56	128.17	152.033	105.94	105.392	80.8293	-0.555319	0.166075	3.34379	0.000826419	0.0103547
AT1G30450	175.428	225.691	196.376	155.57	144.914	145.078	-0.430057	0.128656	3.34268	0.000829739	0.0103898
AT2G09735	60.8628	61.2989	41.628	166.068	114.802	122.28	1.17473	0.351638	-3.34074	0.000835546	0.0104238
AT3G60260	62.0562	61.2989	44.3429	106.894	95.9821	74.6116	0.707511	0.211783	-3.34074	0.000835553	0.0104238
AT4G04835	28.6413	26.9344	34.3884	16.2251	4.70501	9.32645	-1.38911	0.41579	3.3409	0.000835058	0.0104238
AT4G14870	99.0512	127.242	129.409	62.9914	63.9881	70.4665	-0.823511	0.246494	3.3409	0.000835079	0.0104238
AT4G23000	29.8347	23.2193	29.8636	67.7635	63.9881	54.9224	1.07704	0.322365	-3.34105	0.000834629	0.0104238
AT4G40060	151.56	220.119	137.553	125.983	61.1651	89.1194	-0.847699	0.253747	3.34072	0.000835604	0.0104238
AT1G42470	175.428	159.749	226.239	243.376	287.005	282.902	0.516328	0.154648	-3.33873	0.000841611	0.0104922
AT3G22930	7.16033	3.71509	9.95453	21.9515	38.5811	16.5804	1.55139	0.464696	-3.3385	0.000842318	0.0104944
AT5G63860	346.083	398.443	371.032	270.099	288.887	269.431	-0.431177	0.129263	3.33565	0.000851004	0.010596
AT2G03680	474.968	455.098	532.115	400.854	382.988	379.276	-0.335801	0.100772	3.33227	0.000861393	0.0107186
AT5G12250	841.339	795.957	747.495	677.635	618.238	574.095	-0.352329	0.105745	3.33187	0.000862654	0.0107209
AT5G62760	56.0892	65.014	57.9173	31.4957	35.7581	35.2333	-0.781743	0.234619	3.33196	0.000862358	0.0107209
AT4G24380	40.5752	36.2221	17.1942	56.3105	79.9851	103.627	1.22819	0.368821	-3.33004	0.000868346	0.0107849
AT3G20680	91.8909	104.951	109.5	73.49	70.5751	52.8499	-0.629597	0.189199	3.32769	0.000875678	0.0108691
AT4G34630	85.9239	79.8743	68.7767	30.5413	50.8141	58.0313	-0.726468	0.218395	3.32639	0.000879775	0.0109132
AT1G19350	526.284	340.859	384.607	654.729	651.173	649.743	0.6252	0.188203	-3.32194	0.000893942	0.011082
AT1G07393	21.481	27.8631	9.95453	9.54415	3.76401	2.07254	-1.5159	0.456432	3.3212	0.000896311	0.0111044
AT5G27380	541.798	536.83	495.916	458.119	399.926	369.949	-0.360042	0.108464	3.31947	0.000901888	0.0111666
AT1G06040	948.743	863.757	704.057	1163.43	1153.67	1088.09	0.429095	0.129325	-3.31796	0.000906787	0.0112202
AT4G04770	643.236	745.803	475.102	883.788	806.438	832.127	0.429275	0.129389	-3.31771	0.000907584	0.0112231
AT4G19120	500.03	565.622	428.95	1064.17	531.666	813.474	0.663009	0.199899	-3.31671	0.000910833	0.0112563
ATCG00240	546.572	671.502	741.16	893.332	1082.15	1224.87	0.68134	0.205776	-3.31108	0.000929363	0.0114781
AT5G48610	32.2215	59.4414	63.347	23.8604	25.407	25.9068	-0.998558	0.301678	3.31002	0.000932899	0.0115146
AT3G46630	194.522	229.407	216.285	365.541	286.064	333.68	0.599373	0.181095	-3.30971	0.000933913	0.01152
AT3G19130	139.626	138.387	136.649	213.789	186.318	219.69	0.562464	0.170124	-3.30621	0.000945676	0.0116579
AT3G01720	103.825	112.381	97.7354	66.8091	73.3981	73.5753	-0.548915	0.166043	3.30586	0.000946839	0.011665
AT3G47070	1095.53	1255.7	1375.53	2217.11	1615.7	1717.1	0.553897	0.167652	-3.30385	0.000953658	0.0117391
AT4G38620	58.476	96.5922	83.2561	33.4045	48.9321	53.8862	-0.787264	0.238307	3.30357	0.000954628	0.0117391
AT5G03630	508.383	412.374	236.194	256.738	223.958	218.653	-0.701595	0.212375	3.30357	0.000954625	0.0117391
AT1G01820	179.008	183.897	138.458	128.846	112.92	109.845	-0.503262	0.152384	3.3026	0.000957938	0.0117725
AT1G63690	324.602	310.21	301.351	237.649	240.896	246.633	-0.369111	0.111827	3.30073	0.000964349	0.011844
AT2G32710	85.9239	97.521	101.355	62.037	50.8141	70.4665	-0.632515	0.191653	3.30031	0.000965788	0.0118543
AT1G08880	227.937	205.258	209.045	502.977	270.067	268.395	0.66811	0.202556	-3.29839	0.000972421	0.011921
AT2G30790	14.3207	22.2905	22.6239	3.81766	8.46901	4.14509	-1.54968	0.469806	3.29855	0.000971856	0.011921
AT1G80120	10.7405	26.9344	9.95453	55.3561	33.876	46.6323	1.31508	0.398801	-3.29757	0.00097524	0.0119482
AT3G53670	158.721	162.535	148.413	119.302	117.625	96.3733	-0.489481	0.148529	3.29553	0.000982371	0.0120281
AT1G18300	19.0942	16.7179	29.8636	31.4957	69.6341	75.6479	1.26713	0.384582	-3.29482	0.000984862	0.0120438
AT3G02550	29.8347	36.2221	18.0991	9.54415	13.174	8.29018	-1.27582	0.387215	3.29487	0.000984657	0.0120438
AT1G22850	361.597	402.158	270.582	486.752	519.433	489.121	0.521389	0.158364	-3.29236	0.00099352	0.0121422
AT3G55800	3234.08	3028.72	1888.65	4031.45	4099.94	4338.87	0.598697	0.181914	-3.29109	0.000997994	0.0121894
AT3G02130	164.688	196.9	175.562	281.552	288.887	223.835	0.546237	0.16605	-3.28959	0.00100335	0.0122473
AT1G52340	56.0892	92.8771	56.1073	26.7236	47.9911	30.0519	-0.9183	0.279358	3.28718	0.00101197	0.0123449
AT1G01950	113.372	106.809	108.595	132.664	182.554	167.876	0.541987	0.164977	-3.28522	0.00101902	0.0124206
AT4G33630	286.413	295.349	225.334	380.812	344.406	339.897	0.394981	0.120234	-3.28511	0.00101943	0.0124206
AT1G15750	491.676	509.895	390.941	656.638	564.601	594.82	0.377038	0.114814	-3.2839	0.00102382	0.0124666
AT1G73590	52.5091	33.4358	28.9586	79.2164	54.5781	69.4303	0.801728	0.244252	-3.28238	0.00102934	0.0125261
AT5G48412	179.008	132.814	105.88	72.5355	110.097	62.1763	-0.736074	0.224321	3.28133	0.00103317	0.012565
AT1G80760	33.4149	41.7947	27.1487	83.0341	69.6341	55.9587	0.95717	0.291934	-3.27872	0.00104277	0.012674
AT1G23060	26.2545	15.7891	20.814	3.81766	3.76401	7.25391	-1.64685	0.502376	3.27812	0.001045	0.0126933
AT3G54460	299.54	331.571	313.115	265.327	220.194	208.291	-0.446329	0.136166	3.27783	0.00104608	0.0126987
AT2G08965	13.1273	4.64386	9.04957	22.906	26.348	33.1607	1.44356	0.440454	-3.27742	0.00104759	0.0127014
AT4G39390	87.1173	68.7291	74.2065	138.39	122.33	106.736	0.657513	0.200611	-3.27755	0.00104711	0.0127014
AT4G19660	151.56	109.595	146.603	101.168	83.7491	67.3577	-0.675304	0.206163	3.27558	0.00105447	0.0127771
AT4G31050	47.7355	41.7947	49.7726	26.7236	20.702	18.6529	-1.00237	0.306147	3.27414	0.00105983	0.0128342
AT3G14810	127.693	273.059	149.318	320.683	272.89	325.39	0.708824	0.21651	-3.27387	0.00106085	0.0128388
AT1G74440	53.7025	57.5838	57.9173	87.8062	96.9231	101.555	0.726096	0.221888	-3.27235	0.00106656	0.0128941
AT5G46470	278.059	269.344	257.913	311.139	409.336	357.514	0.413698	0.126424	-3.27231	0.00106672	0.0128941
AT1G14740	242.258	268.415	209.045	382.72	314.294	271.503	0.41975	0.128327	-3.27093	0.00107196	0.0129448
AT2G34660	182.588	217.332	141.173	228.105	368.873	264.249	0.651319	0.199136	-3.27072	0.00107274	0.0129448
AT5G27300	73.9901	76.1592	79.6362	50.584	43.2861	49.7411	-0.668896	0.204512	3.27068	0.00107287	0.0129448
AT3G01040	115.759	154.176	118.549	208.062	187.259	166.84	0.514994	0.157483	-3.27015	0.00107489	0.0129507
AT3G52950	82.3438	84.5182	71.4916	111.667	137.386	118.135	0.60669	0.18553	-3.27004	0.00107532	0.0129507
AT5G66900	113.372	125.384	104.975	162.251	149.619	185.493	0.517585	0.15828	-3.27006	0.00107523	0.0129507
AT5G53050	195.716	288.848	188.231	377.948	291.71	322.281	0.542371	0.165996	-3.26737	0.0010855	0.0130654
AT1G04770	35.8016	61.2989	39.8181	21.9515	13.174	8.29018	-1.39182	0.426228	3.26544	0.00109295	0.0131471
AT5G00365	2.38678	0.928771	4.52479	11.453	14.115	9.32645	1.61306	0.494057	-3.26493	0.00109491	0.0131628
AT3G15530	142.013	86.3757	82.3511	162.251	238.073	170.985	0.843186	0.258344	-3.26381	0.00109923	0.0132067
AT4G23270	210.036	171.823	221.714	301.595	265.362	282.902	0.480626	0.147285	-3.26325	0.00110144	0.0132253
AT4G29310	109.792	84.5182	88.6858	51.5384	68.6931	48.7048	-0.715867	0.219399	3.26285	0.00110298	0.0132358
AT1G64385	71.6033	66.8715	75.1114	135.527	88.4541	112.954	0.630803	0.193354	-3.26243	0.00110462	0.0132474
AT5G19190	479.742	389.155	563.788	213.789	348.17	152.332	-0.951559	0.291703	3.26208	0.00110597	0.0132557
AT3G45730	40.5752	36.2221	46.1528	101.168	70.5751	62.1763	0.87732	0.269161	-3.25946	0.00111625	0.0133708
AT1G10740	139.626	165.321	171.942	211.88	250.306	242.488	0.542826	0.166702	-3.25627	0.00112884	0.0135135
AT2G45170	247.031	224.763	228.049	148.889	111.038	126.425	-0.824457	0.25325	3.25551	0.00113189	0.0135336
AT5G66880	217.197	142.102	157.463	136.481	108.215	83.9381	-0.634801	0.194992	3.25553	0.00113182	0.0135336
AT2G01710	72.7967	93.8059	96.8304	64.9002	56.4601	48.7048	-0.628546	0.193116	3.25476	0.00113489	0.0135614
AT5G49450	63.2496	62.2277	43.4379	37.2222	30.112	16.5804	-0.947441	0.29122	3.25335	0.00114052	0.0136205
AT1G51940	368.757	322.284	386.417	565.968	593.772	426.944	0.540689	0.166216	-3.25292	0.00114226	0.013633
AT4G08985	2.38678	0.928771	5.42974	8.58974	28.23	24.8705	1.91497	0.589002	-3.25121	0.00114915	0.0137071
AT5G28910	26.2545	20.433	36.1983	44.8575	61.1651	64.2489	0.966567	0.297471	-3.24929	0.00115694	0.0137917
AT4G29905	622.949	658.499	483.247	927.691	918.417	865.288	0.602185	0.185382	-3.24834	0.00116079	0.0138293
AT3G01500	6187.72	7841.62	6653.24	9649.14	12781.6	11310.9	0.681359	0.209922	-3.24578	0.0011713	0.0139461
AT3G25870	22.6744	32.507	21.719	100.214	36.6991	50.7774	1.14816	0.353758	-3.24561	0.001172	0.0139461
AT5G07770	66.8297	53.8687	54.2974	24.8148	31.053	36.2695	-0.881091	0.27174	3.2424	0.00118527	0.0140955
AT3G06500	248.225	334.358	193.661	390.356	377.342	419.69	0.59747	0.184331	-3.24129	0.00118988	0.0141335
AT4G35770	188.555	338.073	401.801	161.296	106.333	61.1401	-1.32179	0.407785	3.24138	0.00118951	0.0141335
AT1G04647	39.3818	38.0796	40.7231	23.8604	15.997	19.6892	-0.935502	0.288701	3.24039	0.00119366	0.01417
AT3G06590	152.754	82.6606	98.6403	69.6723	63.9881	62.1763	-0.736316	0.227254	3.24006	0.00119503	0.0141777
AT1G07350	59.6694	72.4442	63.347	48.6752	38.5811	30.0519	-0.717142	0.221483	3.23791	0.0012041	0.0142767
AT3G02180	297.154	351.076	416.28	280.598	219.253	227.98	-0.549153	0.169618	3.23758	0.00120547	0.0142845
AT3G02570	435.587	676.145	357.458	309.23	301.12	328.498	-0.630213	0.194707	3.23673	0.00120907	0.0143186
AT4G11110	195.716	227.549	166.512	272.008	250.306	270.467	0.417601	0.129032	-3.23643	0.00121036	0.0143253
AT5G65560	36.995	57.5838	65.1569	25.7692	30.112	31.0882	-0.853832	0.263883	3.23564	0.00121368	0.0143561
AT4G28400	114.565	108.666	63.347	136.481	150.56	159.586	0.630848	0.194992	-3.23525	0.00121537	0.0143675
AT3G15010	233.904	204.33	159.272	152.706	129.858	134.715	-0.506223	0.156654	3.23148	0.00123152	0.0145499
AT5G35753	28.6413	39.0084	50.6776	21.9515	17.879	18.6529	-0.972092	0.300904	3.23057	0.00123545	0.0145875
AT2G35470	120.532	92.8771	116.739	64.9002	81.8671	31.0882	-0.849635	0.263215	3.22791	0.00124696	0.0147148
AT1G22400	105.018	148.603	118.549	73.49	91.2771	78.7567	-0.607509	0.188216	3.22773	0.00124777	0.0147155
AT1G01650	190.942	208.045	136.649	230.968	240.896	260.104	0.445222	0.138006	-3.2261	0.0012549	0.0147908
AT1G17090	8.35372	7.43017	10.8595	22.906	24.466	17.6166	1.13121	0.350877	-3.22394	0.0012644	0.0148921
AT4G12690	48.9289	45.5098	56.1073	29.5869	22.584	19.6892	-1.00556	0.311917	3.22381	0.00126499	0.0148921
AT4G38950	188.555	240.552	160.177	282.507	261.598	289.12	0.487504	0.151269	-3.22277	0.00126956	0.0149371
AT3G07790	182.588	222.905	128.504	248.148	328.409	261.141	0.632533	0.196415	-3.22039	0.00128018	0.0150531
AT1G72500	186.169	234.979	203.615	168.931	125.153	131.607	-0.551349	0.171295	3.21871	0.00128769	0.0151175
AT1G79520	45.3487	35.2933	23.5289	64.9002	92.2181	68.394	1.0371	0.322189	-3.21891	0.00128677	0.0151175
AT4G09970	8.35372	11.1453	21.719	40.0854	22.584	31.0882	1.0286	0.319575	-3.21865	0.00128794	0.0151175
AT4G34350	1391.49	1387.58	950.205	1744.67	1792.61	1827.98	0.514303	0.159868	-3.21704	0.00129521	0.0151938
AT3G58120	348.469	311.138	520.35	267.236	274.772	153.368	-0.746875	0.232188	3.21668	0.00129684	0.015204
AT1G09730	212.423	238.694	228.954	193.746	160.911	165.804	-0.391185	0.121748	3.21309	0.00131317	0.0153864
AT1G75100	319.828	278.631	269.677	454.302	358.522	367.877	0.435486	0.13557	-3.21226	0.00131695	0.0154034
AT4G03205	97.8578	91.9484	114.93	55.3561	79.0441	49.7411	-0.707226	0.220158	3.21235	0.00131653	0.0154034
AT5G10410	10.7405	81.7319	14.4793	152.706	95.9821	105.7	1.44057	0.448441	-3.21239	0.00131637	0.0154034
AT2G19570	48.9289	35.2933	27.1487	15.2706	17.879	19.6892	-0.982677	0.305949	3.2119	0.00131862	0.0154138
AT1G67840	225.55	212.689	209.045	314.957	295.474	271.503	0.436767	0.136035	-3.21069	0.00132417	0.0154697
AT2G09795	79.957	60.3701	56.1073	43.9031	31.994	31.0882	-0.828233	0.258068	3.20937	0.00133028	0.0155319
AT3G51080	47.7355	59.4414	65.1569	35.3134	31.994	30.0519	-0.799969	0.249452	3.20691	0.00134169	0.0156559
AT5G56100	113.372	88.2333	59.7272	58.2193	23.525	36.2695	-1.06057	0.330759	3.20647	0.00134374	0.0156707
AT5G55960	249.418	247.053	205.425	306.367	286.064	312.954	0.36244	0.113041	-3.20627	0.00134468	0.0156725
AT2G45510	35.8016	26.9344	28.9586	10.4986	13.174	16.5804	-1.09025	0.340331	3.20351	0.00135765	0.0157958
AT3G60110	33.4149	45.5098	38.9132	21.9515	15.997	16.5804	-1.04487	0.326159	3.20356	0.00135739	0.0157958
AT5G56350	220.777	250.768	176.467	293.96	296.415	268.395	0.399941	0.124833	-3.20381	0.00135624	0.0157958
AT1G01520	2.38678	0.928771	8.14461	11.453	25.407	18.6529	1.62449	0.507642	-3.20007	0.00137393	0.0159665
AT5G37930	75.1834	63.1564	38.0082	31.4957	33.876	23.8343	-0.914237	0.285686	3.20015	0.00137358	0.0159665
AT1G22530	722	590.699	864.234	1290.37	2015.62	1020.73	0.922499	0.28844	-3.19823	0.00138272	0.0160498
AT1G70250	45.3487	41.7947	47.9627	85.8974	98.8051	73.5753	0.880522	0.275307	-3.19833	0.00138224	0.0160498
AT4G04020	359.21	473.673	341.169	668.091	643.645	556.478	0.645448	0.201839	-3.19783	0.00138465	0.0160629
AT1G04240	193.329	284.204	254.293	416.125	461.091	284.975	0.638913	0.199972	-3.19501	0.00139827	0.0162058
AT1G08645	146.787	132.814	98.6403	229.06	243.719	278.757	0.930678	0.291298	-3.19494	0.00139859	0.0162058
AT4G32030	140.82	108.666	82.3511	186.111	175.967	157.513	0.635708	0.199028	-3.19407	0.00140282	0.0162452
AT1G46768	9.5471	29.7207	13.5744	49.6296	31.053	40.4146	1.05503	0.330486	-3.19234	0.00141123	0.0163331
AT1G05380	137.24	165.321	171.037	116.439	111.038	115.026	-0.473747	0.148474	3.19076	0.00141898	0.0164133
AT3G18380	46.5421	65.014	58.8222	27.678	29.171	40.4146	-0.789986	0.247667	3.18971	0.00142413	0.0164633
AT5G64260	205.263	273.988	257.008	292.051	547.663	370.986	0.688996	0.216082	-3.18859	0.00142969	0.0165179
AT5G62280	89.5041	130.028	126.694	45.8119	33.876	43.5234	-1.30252	0.408568	3.18802	0.00143253	0.0165411
AT3G53250	20.2876	11.1453	9.04957	1.90883	5.64601	0	-1.69781	0.533038	3.18516	0.00144676	0.0166958
AT1G73810	9.5471	9.28771	5.42974	30.5413	22.584	36.2695	1.50251	0.472081	-3.18274	0.00145888	0.016816
AT2G42975	64.443	59.4414	53.3925	107.849	98.8051	77.7204	0.662952	0.208294	-3.18276	0.00145877	0.016816
AT1G67850	63.2496	117.954	52.4875	192.792	116.684	151.296	0.912499	0.286773	-3.18196	0.00146283	0.0168518
AT5G02270	10.7405	26.0056	27.1487	47.7208	75.2801	55.9587	1.26838	0.398678	-3.18146	0.00146536	0.0168712
AT4G19510	236.291	225.691	186.421	285.37	305.825	267.358	0.401545	0.126227	-3.18113	0.001467	0.0168803
AT3G08670	77.5702	97.521	133.029	52.4928	63.9881	60.1038	-0.783452	0.246349	3.18025	0.00147147	0.0169219
AT5G19530	126.499	118.883	113.12	275.826	147.737	154.405	0.661039	0.207964	-3.17862	0.00147979	0.0170077
AT5G38895	35.8016	31.5782	26.2438	16.2251	10.351	17.6166	-0.999531	0.314512	3.17804	0.00148276	0.017032
AT5G50430	113.372	136.529	108.595	190.883	191.964	159.586	0.578422	0.182094	-3.1765	0.00149063	0.0171026
AT5G53500	285.22	322.284	331.214	385.584	517.551	408.291	0.468308	0.147425	-3.17658	0.00149021	0.0171026
AT5G24210	156.334	100.307	115.835	242.421	239.014	161.659	0.755222	0.237839	-3.17535	0.00149654	0.0171605
AT1G75280	221.97	186.683	199.996	275.826	339.701	264.249	0.519695	0.163749	-3.17373	0.00150492	0.0172467
AT3G60410	139.626	137.458	107.69	90.6694	90.3361	86.0106	-0.515831	0.162634	3.17172	0.00151537	0.0173565
AT1G72970	634.882	540.545	671.478	773.076	1024.75	868.396	0.514621	0.162288	-3.17104	0.00151895	0.0173875
AT5G59480	103.825	214.546	92.3056	272.008	194.787	273.576	0.806142	0.254517	-3.16734	0.00153841	0.0176001
AT4G28880	284.026	273.059	265.152	230.014	207.02	182.384	-0.407373	0.128712	3.16499	0.00155089	0.0177326
AT5G20380	105.018	126.313	115.835	171.795	166.557	154.405	0.486596	0.153822	-3.16336	0.00155958	0.0178218
AT5G22090	363.983	323.212	277.822	517.293	506.259	439.38	0.582976	0.184577	-3.15845	0.0015861	0.0181144
AT5G67140	42.962	25.0768	25.3388	58.2193	59.2831	74.6116	0.980783	0.310611	-3.15759	0.00159079	0.0181574
AT1G71880	395.011	568.408	314.925	716.766	845.019	615.546	0.736303	0.23323	-3.15698	0.00159415	0.0181853
AT1G77640	7.16033	5.57263	9.95453	20.0427	53.6371	21.7617	1.64121	0.519915	-3.15668	0.00159577	0.0181934
AT2G43500	69.2165	96.5922	81.4461	109.758	135.504	149.223	0.643453	0.204052	-3.15337	0.00161396	0.0183902
AT1G20630	337.729	333.429	305.876	228.105	230.545	202.073	-0.556426	0.176526	3.15209	0.00162107	0.0184607
AT2G37470	145.593	106.809	59.7272	237.649	155.265	147.151	0.763313	0.242291	-3.1504	0.00163047	0.0185571
AT1G44350	147.98	430.021	161.082	167.023	109.156	90.1557	-0.952434	0.302637	3.14711	0.00164892	0.0187563
AT1G53390	174.235	187.612	206.33	158.433	116.684	133.679	-0.478561	0.152083	3.14671	0.00165117	0.0187605
AT3G13570	164.688	121.669	142.078	221.424	154.324	214.508	0.454333	0.144382	-3.14675	0.00165098	0.0187605
AT5G14410	68.0231	69.6578	58.8222	49.6296	35.7581	22.798	-0.816616	0.259555	3.14621	0.00165399	0.0187817
AT2G15820	97.8578	130.028	113.12	67.7635	86.5721	77.7204	-0.553827	0.176168	3.14374	0.00166804	0.0189305
AT2G40840	1107.46	1173.04	743.875	745.398	717.043	596.893	-0.544929	0.173354	3.14345	0.00166972	0.0189387
AT5G62210	4.77355	2.78631	7.23966	10.4986	23.525	14.5078	1.37233	0.436911	-3.14098	0.00168383	0.0190879
AT5G41260	227.937	181.11	219.905	339.772	273.831	249.742	0.446287	0.142199	-3.13848	0.00169825	0.0192404
AT3G16030	11.9339	8.35894	14.4793	30.5413	33.876	25.9068	1.21164	0.386272	-3.13675	0.00170832	0.0193183
AT4G08940	38.1884	36.2221	38.0082	22.906	11.292	20.7254	-0.967017	0.308298	3.13663	0.00170902	0.0193183
AT4G16690	21.481	23.2193	20.814	36.2678	66.8111	52.8499	1.12999	0.360242	-3.13676	0.00170828	0.0193183
AT4G27470	44.1554	39.9372	40.7231	10.4986	27.289	15.5441	-1.11947	0.356872	3.1369	0.00170746	0.0193183
AT5G18310	84.7306	82.6606	51.5826	110.712	154.324	132.643	0.823685	0.262666	-3.13586	0.0017135	0.0193579
AT4G27710	220.777	273.059	245.243	179.43	178.79	164.767	-0.498527	0.159126	3.13291	0.00173085	0.0195429
AT1G29355	34.6083	40.8659	32.5785	18.1339	18.82	17.6166	-0.932594	0.297814	3.13147	0.00173934	0.0196276
AT3G53540	229.131	246.124	319.45	189.929	204.197	160.622	-0.519403	0.165918	3.13047	0.00174524	0.019683
AT5G66790	75.1834	39.9372	35.2933	95.4415	90.3361	76.6842	0.786241	0.251214	-3.12977	0.00174945	0.0197193
AT3G24460	13.1273	24.1481	24.4338	28.6325	56.4601	70.4665	1.16795	0.373218	-3.12942	0.00175154	0.0197316
AT4G04570	353.243	258.198	346.599	446.666	389.575	470.468	0.436833	0.139598	-3.12921	0.00175275	0.0197341
AT5G24830	40.5752	49.2249	64.252	13.3618	25.407	38.3421	-0.947911	0.303002	3.1284	0.00175761	0.0197776
AT1G04530	212.423	201.543	171.037	283.461	311.471	322.281	0.629003	0.201113	-3.12762	0.00176231	0.019808
AT5G24105	56.0892	39.9372	52.4875	83.9885	96.9231	82.9018	0.78843	0.252084	-3.12765	0.00176211	0.019808
AT3G24530	96.6644	96.5922	121.264	183.248	159.029	136.788	0.581256	0.185955	-3.12579	0.00177328	0.0199201
AT3G23690	198.102	222.905	190.946	162.251	137.386	143.006	-0.46629	0.149184	3.1256	0.0017744	0.0199214
AT5G19150	4022.91	2814.18	3457.84	2677.13	2429.67	2194.83	-0.494203	0.158166	3.12459	0.00178051	0.0199787
AT1G68330	38.1884	15.7891	28.9586	8.58974	11.292	12.4353	-1.20257	0.385123	3.12256	0.00179284	0.0201057
AT3G55090	17.9008	18.5754	24.4338	0.954415	10.351	5.18136	-1.53542	0.49212	3.12002	0.0018084	0.0202687
AT5G13190	110.985	121.669	94.1155	161.296	239.955	140.933	0.703672	0.225715	-3.11753	0.00182375	0.0204293
AT1G75490	13.1273	20.433	23.5289	0.954415	5.64601	8.29018	-1.5542	0.498932	3.11504	0.00183918	0.0205673
AT3G22150	139.626	174.609	123.979	90.6694	108.215	102.591	-0.533005	0.1711	3.11518	0.00183834	0.0205673
AT5G57123	22.6744	23.2193	22.6239	48.6752	42.3451	52.8499	0.988751	0.31738	-3.11535	0.00183725	0.0205673
AT3G01830	2.38678	7.43017	7.23966	16.2251	29.171	22.798	1.56809	0.503467	-3.11458	0.00184209	0.0205883
AT2G35940	297.154	337.144	223.524	371.267	480.852	439.38	0.575891	0.185116	-3.11098	0.0018647	0.0208293
AT5G01410	589.534	400.3	210.855	795.028	701.046	627.981	0.785736	0.25263	-3.11022	0.00186947	0.0208709
AT4G23290	262.545	254.483	202.71	363.632	329.35	328.498	0.494412	0.159004	-3.10944	0.00187443	0.0209144
AT1G03000	126.499	176.467	175.562	120.256	96.9231	120.208	-0.510896	0.16448	3.10612	0.00189557	0.0211385
AT2G35660	81.1504	53.8687	55.2024	91.6238	112.92	104.664	0.684738	0.220477	-3.10571	0.0018982	0.0211559
AT1G24580	4.77355	1.85754	6.3347	20.9971	15.056	20.7254	1.55821	0.501973	-3.10416	0.0019082	0.0212554
AT5G50915	10.7405	38.0796	37.1032	61.0826	87.5131	78.7567	1.21472	0.391405	-3.10349	0.00191256	0.0212921
AT5G66740	15.514	11.1453	21.719	24.8148	42.3451	65.2852	1.26639	0.408085	-3.10325	0.00191405	0.0212967
AT5G19485	91.8909	92.8771	76.9214	68.7179	53.6371	45.596	-0.619814	0.199808	3.10204	0.0019219	0.0213722
AT5G59770	85.9239	81.7319	76.9214	142.208	106.333	107.772	0.529482	0.170733	-3.10122	0.00192722	0.0214193
AT1G12790	31.0281	45.5098	49.7726	16.2251	22.584	23.8343	-0.964276	0.310986	3.10071	0.00193057	0.0214446
AT5G27860	218.39	193.184	155.653	161.296	111.038	94.3008	-0.613347	0.19784	3.10022	0.00193376	0.021468
AT3G28080	82.3438	88.2333	119.454	65.8546	37.6401	72.5391	-0.709884	0.229344	3.09528	0.00196626	0.0218166
AT1G03060	417.686	506.18	436.189	388.447	358.522	351.296	-0.314103	0.10149	3.09493	0.00196862	0.0218184
AT2G41330	14.3207	22.2905	28.0537	46.7663	75.2801	41.4509	1.17097	0.378336	-3.09506	0.00196774	0.0218184
AT2G22810	22.6744	27.8631	22.6239	9.54415	8.46901	9.32645	-1.24183	0.401451	3.09335	0.00197908	0.0219222
AT2G07629	105.018	118.883	109.5	144.117	188.2	158.55	0.539301	0.174432	-3.09176	0.00198976	0.0220281
AT3G08880	46.5421	48.2961	34.3884	84.9429	61.1651	72.5391	0.729364	0.236012	-3.09037	0.00199909	0.0221191
AT5G53750	44.1554	30.6495	34.3884	45.8119	82.8081	71.5028	0.838362	0.271303	-3.09013	0.00200066	0.0221241
AT1G01770	85.9239	110.524	75.1114	54.4017	63.0471	54.9224	-0.640771	0.207436	3.08901	0.00200825	0.0221958
AT1G79510	78.7636	74.3017	73.3015	126.937	132.681	101.555	0.649597	0.210337	-3.08837	0.00201258	0.0222313
AT3G51660	77.5702	147.675	120.359	258.646	205.138	158.55	0.796742	0.25803	-3.08779	0.00201649	0.0222621
AT2G39450	190.942	155.105	167.417	202.336	317.117	270.467	0.60402	0.195685	-3.0867	0.0020239	0.0223315
AT1G09060	184.975	203.401	156.558	232.877	249.365	242.488	0.404013	0.130922	-3.08591	0.00202931	0.0223663
AT2G44730	95.471	90.0908	124.884	62.9914	79.9851	48.7048	-0.68011	0.220388	3.08596	0.00202896	0.0223663
AT3G43800	183.782	150.461	144.793	83.0341	139.268	98.4459	-0.56217	0.182192	3.08559	0.00203147	0.0223777
AT1G01300	324.602	253.555	328.499	404.672	480.852	456.996	0.549094	0.178004	-3.08472	0.00203742	0.0224308
AT1G70320	1128.95	1392.23	1213.55	992.592	969.231	994.822	-0.339924	0.110272	3.08258	0.00205211	0.0225795
AT5G14220	136.046	171.823	161.987	93.5327	112.92	119.171	-0.529266	0.171704	3.08243	0.0020532	0.0225795
AT5G53460	1965.51	1798.1	1334.81	1427.8	1196.01	1296.38	-0.377617	0.12253	3.08184	0.00205725	0.0226116
AT5G07620	42.962	52.94	37.1032	89.715	72.4571	68.394	0.756355	0.245453	-3.08147	0.0020598	0.0226271
AT5G14270	254.192	272.13	225.334	381.766	360.404	273.576	0.424762	0.137908	-3.08004	0.00206971	0.0227233
AT4G02555	11.9339	20.433	9.04957	4.77208	3.76401	3.10882	-1.3969	0.453647	3.07927	0.00207507	0.0227696
AT2G24270	1165.94	1147.96	1149.3	1319.96	1831.19	1392.75	0.38341	0.124549	-3.07838	0.0020813	0.0228254
AT2G27420	3.58016	6.5014	14.4793	14.3162	40.4631	41.4509	1.52225	0.494799	-3.07651	0.00209438	0.0229562
AT5G18670	87.1173	90.0908	84.161	115.484	133.622	137.824	0.548412	0.178274	-3.07623	0.00209636	0.0229652
AT1G07700	151.56	188.541	108.595	281.552	232.427	180.311	0.609338	0.198109	-3.07578	0.00209956	0.0229876
AT4G28290	35.8016	46.4386	37.1032	16.2251	26.348	15.5441	-0.97447	0.316947	3.07455	0.00210818	0.0230693
AT1G80110	26.2545	21.3617	17.1942	75.3988	32.935	36.2695	1.06161	0.345446	-3.07314	0.00211817	0.0231658
AT1G75310	120.532	143.031	133.934	164.159	313.353	193.783	0.722569	0.235141	-3.07292	0.00211975	0.0231703
AT3G50210	72.7967	74.3017	62.442	47.7208	28.23	31.0882	-0.914064	0.29762	3.07125	0.00213165	0.0232748
AT5G63990	32.2215	19.5042	11.7644	50.584	26.348	54.9224	0.981725	0.319635	-3.0714	0.0021306	0.0232748
AT4G29210	121.726	146.746	82.3511	58.2193	74.3391	82.9018	-0.679137	0.221339	3.06831	0.00215274	0.02348
ATCG00500	6241.42	8023.65	6759.12	8958.14	8959.27	10202.1	0.410883	0.133912	-3.0683	0.00215281	0.02348
AT3G11500	84.7306	81.7319	104.975	139.345	117.625	137.824	0.516664	0.168413	-3.06785	0.00215606	0.0235026
AT4G39730	379.497	386.369	276.917	457.165	593.772	507.774	0.56536	0.18433	-3.06711	0.00216136	0.0235474
AT3G45160	39.3818	36.2221	36.1983	20.0427	17.879	15.5441	-0.983569	0.320895	3.06508	0.00217612	0.0236953
AT4G16410	393.818	386.369	200.9	564.059	453.563	475.649	0.591014	0.192896	-3.0639	0.00218472	0.0237758
AT4G34260	298.347	389.155	371.937	555.47	565.542	496.375	0.587015	0.191725	-3.06176	0.00220041	0.0239335
AT1G19270	90.6975	81.7319	71.4916	164.159	104.451	122.28	0.657435	0.214831	-3.06025	0.00221155	0.0240415
AT5G12170	113.372	104.951	107.69	59.1737	76.2211	61.1401	-0.704525	0.230441	3.05729	0.00223346	0.0242665
AT3G06080	282.833	349.218	329.404	280.598	213.607	212.436	-0.447261	0.146322	3.0567	0.00223787	0.0243003
AT5G43020	65.6363	87.3045	71.4916	132.664	134.563	89.1194	0.637021	0.208412	-3.05655	0.00223902	0.0243003
AT2G27230	162.301	278.631	142.078	127.892	93.1591	132.643	-0.697904	0.228396	3.05568	0.00224554	0.0243402
AT3G24740	91.8909	99.3785	105.88	64.9002	68.6931	66.3214	-0.568315	0.185993	3.05556	0.00224638	0.0243402
AT4G26690	400.978	430.95	484.152	620.37	820.553	650.779	0.64145	0.209925	-3.05562	0.00224595	0.0243402
AT3G43720	525.091	441.166	335.739	676.68	573.07	560.623	0.467118	0.152942	-3.05421	0.00225654	0.0244343
AT3G58490	145.593	158.82	133.934	233.832	176.908	188.602	0.439294	0.143838	-3.05408	0.00225752	0.0244343
AT5G47560	630.109	322.284	215.38	577.421	919.358	710.883	0.868391	0.284419	-3.05321	0.00226407	0.0244919
AT3G08710	77.5702	67.8003	53.3925	114.53	109.156	101.555	0.688499	0.225517	-3.05299	0.00226577	0.0244969
AT5G66650	14.3207	9.28771	21.719	28.6325	49.8731	42.4872	1.24026	0.406643	-3.04999	0.00228847	0.024729
AT3G43600	251.805	261.913	221.714	307.322	316.176	296.374	0.317895	0.104264	-3.04893	0.00229661	0.0248033
AT1G04520	60.8628	55.7263	55.2024	107.849	68.6931	84.9743	0.585755	0.192164	-3.0482	0.00230216	0.0248498
AT2G19710	103.825	80.8031	124.884	162.251	163.734	147.151	0.588454	0.193186	-3.04605	0.00231871	0.0249878
AT2G47730	596.694	713.296	700.437	864.7	1200.72	946.117	0.563848	0.185107	-3.04607	0.00231855	0.0249878
AT5G26980	39.3818	47.3673	41.628	19.0883	27.289	13.4715	-1.01719	0.333915	3.04624	0.00231725	0.0249878
AT3G14760	54.8958	34.3645	53.3925	14.3162	21.643	27.9794	-1.06289	0.348966	3.04581	0.00232052	0.0249937
AT1G16860	270.899	367.793	242.529	397.991	378.283	463.214	0.479703	0.157522	-3.0453	0.00232446	0.0250184
AT3G08590	287.607	277.703	274.202	333.091	494.967	362.695	0.491815	0.161505	-3.04519	0.00232533	0.0250184
AT3G22060	65.6363	79.8743	67.8718	186.111	100.687	93.2645	0.78667	0.258399	-3.0444	0.00233143	0.0250704
AT1G32440	106.212	117.025	129.409	186.111	148.678	184.457	0.533485	0.175246	-3.04421	0.00233294	0.0250731
AT1G15740	458.261	365.936	239.814	228.105	214.548	239.379	-0.621546	0.20421	3.04366	0.00233719	0.0251052
AT1G73540	66.8297	69.6578	69.6817	90.6694	121.389	147.151	0.763591	0.250929	-3.04306	0.00234187	0.0251419
AT3G52920	176.621	193.184	200.9	250.057	301.12	247.669	0.469169	0.154248	-3.04165	0.00235284	0.025246
AT4G21910	168.268	390.084	194.566	113.575	167.498	147.151	-0.777663	0.2557	3.04131	0.00235553	0.0252612
AT5G02860	103.825	113.31	123.979	189.929	130.799	178.239	0.525365	0.172838	-3.03964	0.00236864	0.0253881
AT2G15292	145.593	96.5922	97.7354	73.49	79.0441	76.6842	-0.545618	0.179518	3.03934	0.00237094	0.0253991
AT1G66980	577.6	572.123	597.272	497.25	438.507	434.198	-0.354162	0.116557	3.03853	0.00237734	0.0254402
AT4G30130	38.1884	63.1564	53.3925	20.0427	30.112	20.7254	-1.03824	0.341691	3.03854	0.00237728	0.0254402
AT1G65486	7.16033	7.43017	12.6694	41.0398	26.348	19.6892	1.40687	0.463428	-3.03579	0.00239909	0.0256592
AT5G52760	10.7405	7.43017	6.3347	22.906	22.584	29.0156	1.36746	0.450662	-3.03434	0.00241062	0.0257686
AT3G55130	285.22	365.936	210.855	163.205	203.256	208.291	-0.570384	0.188059	3.03301	0.00242127	0.0258686
AT3G45980	583.567	477.388	388.227	968.731	609.769	579.276	0.55544	0.183372	-3.02903	0.00245338	0.0261976
AT5G16360	10.7405	14.8603	6.3347	20.0427	31.994	33.1607	1.24725	0.412083	-3.02669	0.00247247	0.0263872
AT2G36680	102.631	89.162	88.6858	66.8091	62.1061	52.8499	-0.607329	0.200788	3.02473	0.00248854	0.0265329
AT5G16190	33.4149	57.5838	54.2974	26.7236	21.643	23.8343	-0.95784	0.316673	3.0247	0.00248879	0.0265329
AT3G27050	87.1173	103.094	62.442	142.208	106.333	141.969	0.607535	0.201014	-3.02234	0.00250825	0.0267116
AT5G65360	255.385	271.201	247.958	446.666	313.353	299.483	0.438018	0.144921	-3.02246	0.00250726	0.0267116
AT3G02170	426.04	424.448	459.718	167.977	387.693	185.493	-0.786694	0.260368	3.02146	0.00251555	0.0267729
AT3G12920	168.268	183.897	224.429	127.892	154.324	92.2283	-0.613426	0.203032	3.02133	0.00251669	0.0267729
AT1G73990	180.202	192.256	114.93	220.47	207.961	254.923	0.480867	0.15918	-3.0209	0.00252026	0.0267965
AT1G74320	108.598	116.096	104.07	70.6267	68.6931	90.1557	-0.51708	0.171204	3.02026	0.00252558	0.0268336
AT5G16660	238.678	234.979	190.946	171.795	171.262	160.622	-0.395091	0.130818	3.02016	0.00252645	0.0268336
AT1G75020	47.7355	58.5126	53.3925	79.2164	87.5131	86.0106	0.631066	0.209157	-3.01718	0.00255135	0.0270836
AT2G16650	42.962	60.3701	57.0123	26.7236	28.23	34.197	-0.820534	0.27199	3.01678	0.00255479	0.0271056
AT5G06385	4.77355	5.57263	10.8595	14.3162	20.702	24.8705	1.23397	0.409168	-3.0158	0.00256306	0.0271789
AT3G10985	128.886	128.17	104.07	177.521	212.666	168.912	0.612119	0.203002	-3.01533	0.00256699	0.0272059
AT2G15620	1208.9	1294.71	611.751	1602.46	1518.78	1649.75	0.598882	0.198687	-3.0142	0.00257656	0.0272928
AT3G12970	5.96694	10.2165	20.814	41.9943	23.525	34.197	1.21005	0.401511	-3.01374	0.0025805	0.0273201
AT4G08035	52.5091	65.9428	74.2065	45.8119	37.6401	32.1244	-0.721203	0.239344	3.01324	0.00258471	0.0273363
AT4G22290	157.527	190.398	168.322	264.373	218.312	206.218	0.401639	0.133299	-3.01307	0.00258617	0.0273363
AT5G63120	60.8628	65.014	46.1528	96.3959	82.8081	86.0106	0.604858	0.200736	-3.0132	0.00258505	0.0273363
AT5G41100	91.8909	77.088	76.0164	97.3503	128.917	152.332	0.612345	0.203258	-3.01264	0.00258983	0.0273605
AT2G18328	207.65	233.122	114.025	362.678	264.421	291.193	0.699085	0.232152	-3.01132	0.00260117	0.027463
AT4G29950	225.55	285.133	162.892	342.635	316.176	284.975	0.476364	0.158198	-3.01119	0.00260229	0.027463
AT3G58690	70.4099	69.6578	53.3925	104.031	121.389	96.3733	0.705882	0.2345	-3.01015	0.00261115	0.0275418
AT4G28270	40.5752	48.2961	36.1983	10.4986	24.466	25.9068	-0.97099	0.322633	3.00958	0.00261605	0.0275789
AT5G24380	35.8016	31.5782	26.2438	50.584	57.4011	89.1194	0.993572	0.330191	-3.00908	0.00262039	0.02761
AT4G33000	161.107	130.957	114.025	89.715	97.8641	93.2645	-0.51698	0.17195	3.00657	0.00264213	0.0278242
AT3G58020	33.4149	48.2961	51.5826	19.0883	23.525	31.0882	-0.83024	0.276211	3.00582	0.00264867	0.0278783
AT2G35945	150.367	145.817	115.835	180.384	230.545	196.892	0.548711	0.182593	-3.00511	0.00265489	0.027929
AT1G29380	40.5752	30.6495	34.3884	90.6694	56.4601	60.1038	0.911943	0.303559	-3.00417	0.00266308	0.0279856
AT5G08130	258.965	305.566	331.214	575.512	359.463	389.638	0.540157	0.179797	-3.00426	0.00266224	0.0279856
AT3G27000	58.476	31.5782	56.1073	23.8604	22.584	31.0882	-0.861244	0.286819	3.00275	0.00267554	0.0281016
AT2G20250	41.7686	39.9372	47.9627	23.8604	23.525	22.798	-0.850174	0.283372	3.0002	0.00269799	0.0283095
AT3G15880	304.314	340.859	331.214	433.304	395.221	431.089	0.355435	0.118471	-3.00018	0.00269817	0.0283095
AT1G55000	163.494	129.099	104.975	99.2592	71.5161	86.0106	-0.609508	0.203168	3.00002	0.00269963	0.0283098
AT1G17340	163.494	191.327	175.562	129.8	136.445	120.208	-0.457479	0.152556	2.99877	0.00271075	0.0284114
AT2G36460	533.444	456.027	263.343	260.555	307.707	256.996	-0.583095	0.194467	2.99843	0.00271379	0.0284282
AT2G26900	1022.73	957.563	817.176	827.478	756.565	706.738	-0.288944	0.0964128	2.99695	0.00272695	0.0285511
AT1G64400	145.593	136.529	93.2106	168.931	209.843	169.949	0.540667	0.180434	-2.99648	0.00273121	0.0285655
AT5G19390	412.912	393.799	344.789	475.299	488.38	443.525	0.286921	0.0957492	-2.99659	0.00273022	0.0285655
AT3G51450	69.2165	270.272	66.0619	69.6723	53.6371	36.2695	-1.19659	0.399448	2.9956	0.00273902	0.0286171
AT5G64550	54.8958	51.0824	30.7685	71.5811	101.628	106.736	0.96171	0.321026	-2.99574	0.00273782	0.0286171
AT4G13930	1152.81	1175.82	675.098	1560.47	1273.17	1426.95	0.493703	0.164928	-2.99345	0.0027584	0.0288045
AT1G02400	23.8678	126.313	10.8595	197.564	94.1001	233.161	1.42273	0.475343	-2.99305	0.00276205	0.0288274
AT1G05460	62.0562	74.3017	56.1073	41.9943	36.6991	37.3058	-0.708345	0.236807	2.99123	0.00277852	0.0289841
AT2G27860	1103.88	1152.61	1123.96	1036.49	900.538	909.847	-0.253137	0.0846516	2.99034	0.0027867	0.0290542
AT3G29130	50.1223	64.0852	79.6362	40.0854	32.935	38.3421	-0.778377	0.260354	2.98969	0.00279263	0.0290855
AT4G22540	436.78	387.298	450.669	349.316	320.881	293.265	-0.405149	0.135514	2.98972	0.00279233	0.0290855
AT5G22630	77.5702	80.8031	50.6776	112.621	120.448	103.627	0.666752	0.223073	-2.98895	0.00279942	0.0291409
AT2G45820	520.317	980.782	456.098	1001.18	922.181	1149.23	0.630224	0.210897	-2.9883	0.00280534	0.029172
AT5G20030	16.7074	14.8603	15.3843	4.77208	5.64601	5.18136	-1.30811	0.437745	2.9883	0.00280533	0.029172
AT4G30270	700.519	612.989	560.168	1039.36	1145.2	845.598	0.664517	0.222467	-2.98704	0.00281695	0.0292774
AT2G41740	673.071	680.789	718.536	613.689	589.067	538.862	-0.256476	0.0858843	2.9863	0.00282374	0.0293327
AT1G51110	319.828	430.95	314.925	517.293	518.492	482.903	0.496103	0.166217	-2.98467	0.00283887	0.0294745
AT1G52870	738.707	586.983	382.797	931.509	813.966	780.313	0.550209	0.184444	-2.98307	0.00285369	0.0296128
AT5G51570	93.0843	89.162	41.628	164.159	91.2771	144.042	0.793505	0.266043	-2.98262	0.00285792	0.0296413
AT2G46685	3.58016	3.71509	0.904957	20.9971	6.58701	9.32645	1.557	0.52207	-2.98237	0.00286029	0.0296459
AT5G51180	150.367	130.028	117.644	182.293	168.439	192.747	0.443722	0.148787	-2.98225	0.00286135	0.0296459
AT1G24440	65.6363	52.0112	53.3925	38.1766	33.876	30.0519	-0.711604	0.238754	2.98049	0.0028779	0.0298017
AT3G23550	53.7025	39.9372	29.8636	20.0427	13.174	7.25391	-1.34728	0.452307	2.97868	0.00289492	0.0299624
AT1G28760	31.0281	28.7919	28.9586	13.3618	17.879	12.4353	-0.947073	0.317984	2.97837	0.00289786	0.0299772
AT1G65390	13.1273	91.9484	13.5744	218.561	110.097	198.964	1.61748	0.543316	-2.97706	0.00291031	0.0300748
AT5G24530	229.131	166.25	148.413	491.524	345.347	256.996	0.931269	0.312808	-2.97713	0.00290962	0.0300748
AT3G03870	295.96	220.119	237.099	166.068	174.085	154.405	-0.592395	0.199016	2.97662	0.00291446	0.0301019
AT5G10270	69.2165	75.2305	75.1114	46.7663	53.6371	41.4509	-0.616992	0.207445	2.97424	0.00293711	0.0303201
AT1G10550	9.5471	6.5014	18.0991	62.9914	61.1651	42.4872	1.60693	0.540523	-2.97292	0.00294983	0.0304199
AT3G29400	99.0512	100.307	69.6817	126.937	131.74	125.389	0.506561	0.17039	-2.97295	0.00294954	0.0304199
AT4G34750	65.6363	52.94	27.1487	115.484	70.5751	81.8655	0.838875	0.282188	-2.97275	0.00295143	0.0304206
AT5G16040	82.3438	42.7235	63.347	97.3503	92.2181	100.518	0.611345	0.205699	-2.97203	0.00295836	0.0304762
AT3G61750	97.8578	108.666	104.975	154.615	183.495	129.534	0.564998	0.19014	-2.97148	0.00296366	0.030515
AT5G51550	439.167	321.355	504.966	695.769	1290.11	567.877	0.931528	0.313515	-2.97124	0.00296603	0.0305235
AT4G38060	41.7686	82.6606	39.8181	27.678	25.407	37.3058	-0.82443	0.277688	2.96891	0.00298857	0.0307396
AT4G24780	701.712	560.049	534.83	389.401	190.082	491.193	-0.718619	0.242146	2.9677	0.00300033	0.0308446
AT5G67150	50.1223	80.8031	48.8677	31.4957	26.348	43.5234	-0.796629	0.268451	2.9675	0.00300228	0.0308487
AT4G01360	5.96694	7.43017	1.80991	20.9971	23.525	27.9794	1.67004	0.562885	-2.96693	0.00300788	0.0308903
AT1G61500	50.1223	54.7975	46.1528	24.8148	27.289	34.197	-0.779075	0.26269	2.96575	0.00301941	0.0309927
AT3G21650	119.339	93.8059	114.025	180.384	133.622	147.151	0.483251	0.163166	-2.96172	0.00305921	0.0313849
AT3G17330	155.14	143.96	159.272	189.929	223.017	222.799	0.459426	0.155134	-2.96148	0.00306161	0.0313933
AT3G11490	106.212	101.236	134.839	158.433	180.672	161.659	0.526766	0.1779	-2.96102	0.00306622	0.0314244
AT1G20696	548.958	513.611	635.28	913.375	714.22	660.106	0.414555	0.140023	-2.96063	0.00307014	0.0314321
AT3G49390	138.433	124.455	150.223	115.484	89.3951	92.2283	-0.473934	0.160074	2.96072	0.00306921	0.0314321
AT2G36880	1303.18	1156.32	776.453	1412.53	1381.39	1591.71	0.432446	0.146099	-2.95996	0.00307678	0.0314698
AT5G54170	156.334	353.862	106.785	135.527	63.9881	93.2645	-0.987886	0.333752	2.95994	0.00307699	0.0314698
AT4G16447	10.7405	12.074	19.9091	8.58974	0.941001	4.14509	-1.33213	0.450109	2.95958	0.0030806	0.0314906
AT1G72930	287.607	146.746	123.979	328.319	398.985	334.716	0.871835	0.294636	-2.95902	0.00308615	0.0315197
AT2G32415	112.178	83.5894	95.9255	58.2193	57.4011	59.0675	-0.71051	0.240122	2.95895	0.00308686	0.0315197
AT4G03560	941.583	807.102	846.135	783.575	761.27	658.033	-0.237816	0.0803755	2.95882	0.0030882	0.0315197
AT2G22970	122.919	73.3729	111.31	62.9914	63.9881	52.8499	-0.739788	0.250073	2.95828	0.00309357	0.0315582
AT5G61910	96.6644	147.675	123.979	88.7606	72.4571	80.8293	-0.60139	0.20337	2.95713	0.00310521	0.0316608
AT2G33835	64.443	65.014	61.5371	37.2222	33.876	33.1607	-0.828569	0.280233	2.95672	0.00310932	0.0316864
AT1G09010	269.706	345.503	250.673	231.923	223.958	194.819	-0.411697	0.13927	2.95611	0.00311544	0.0317324
AT5G20070	151.56	204.33	109.5	205.199	224.899	259.068	0.551536	0.186653	-2.95488	0.00312794	0.0318434
AT5G25140	41.7686	39.0084	34.3884	66.8091	74.3391	56.995	0.749205	0.253653	-2.95366	0.00314027	0.0319526
AT2G36895	101.438	127.242	101.355	178.476	170.321	187.565	0.669204	0.226581	-2.95348	0.00314209	0.0319548
AT1G13000	106.212	91.9484	95.0205	173.704	121.389	139.897	0.552023	0.186957	-2.95267	0.00315039	0.0320178
AT4G37460	341.309	350.147	338.454	516.339	399.926	421.763	0.366837	0.12425	-2.9524	0.00315312	0.0320178
AT5G37550	1.19339	2.78631	1.80991	4.77208	14.115	12.4353	1.6074	0.544421	-2.95249	0.00315225	0.0320178
AT1G07620	15.514	13.9316	13.5744	38.1766	40.4631	35.2333	1.21965	0.413193	-2.95176	0.00315968	0.0320289
AT1G18620	538.218	498.75	627.135	439.031	397.103	372.022	-0.462654	0.156742	2.95169	0.00316039	0.0320289
AT1G27030	79.957	108.666	151.128	80.1709	75.2801	39.3784	-0.775962	0.262888	2.95169	0.00316045	0.0320289
AT3G50440	157.527	115.168	86.8759	62.9914	91.2771	61.1401	-0.701169	0.23755	2.95166	0.00316067	0.0320289
AT3G04720	137.24	95.6634	69.6817	46.7663	33.876	38.3421	-1.18456	0.401449	2.9507	0.00317051	0.0321018
AT3G17790	75.1834	55.7263	24.4338	88.7606	119.507	141.969	1.06196	0.359908	-2.95065	0.00317108	0.0321018
AT1G05303	5.96694	13.9316	12.6694	20.0427	19.761	39.3784	1.10206	0.373707	-2.949	0.00318809	0.0322411
AT1G70790	50.1223	31.5782	43.4379	62.9914	71.5161	78.7567	0.741302	0.251367	-2.94909	0.00318713	0.0322411
AT5G51290	103.825	74.3017	80.5412	56.3105	55.5191	59.0675	-0.577535	0.195972	2.94703	0.00320842	0.0324302
AT3G17100	291.187	220.119	291.396	234.786	182.554	152.332	-0.491534	0.166801	2.94683	0.0032105	0.0324347
AT3G19780	83.5372	88.2333	103.165	58.2193	60.2241	55.9587	-0.644649	0.218804	2.94624	0.00321659	0.0324798
AT3G19480	175.428	142.102	116.739	208.062	194.787	217.617	0.507627	0.172378	-2.94485	0.00323116	0.0326102
AT3G29575	33.4149	56.655	43.4379	124.074	86.5721	63.2126	0.945558	0.321253	-2.94334	0.00324691	0.0327526
AT5G54075	2217.31	144.888	16.2892	9.54415	87.5131	94.3008	-1.76911	0.601143	2.94291	0.00325141	0.0327813
AT4G29700	83.5372	153.247	81.4461	49.6296	63.9881	50.7774	-0.89518	0.30425	2.94225	0.00325837	0.0328349
AT5G23660	94.2777	146.746	111.31	55.3561	65.8701	60.1038	-0.896353	0.304837	2.94043	0.00327753	0.0330112
AT3G62660	315.054	246.124	247.958	453.347	507.2	325.39	0.642223	0.218552	-2.93853	0.00329769	0.033172
AT4G04860	79.957	70.5866	72.3966	117.393	102.569	93.2645	0.482051	0.164049	-2.93846	0.00329851	0.033172
AT5G48820	16.7074	16.7179	20.814	7.63532	6.58701	7.25391	-1.18022	0.401614	2.93869	0.00329605	0.033172
AT1G58100	66.8297	60.3701	72.3966	115.484	130.799	88.0832	0.707458	0.240911	-2.93659	0.00331842	0.0333554
AT3G08075	94.2777	128.17	154.748	220.47	192.905	156.477	0.562963	0.191778	-2.93549	0.00333018	0.0334567
AT1G77510	221.97	148.603	171.037	128.846	127.976	118.135	-0.517107	0.176228	2.93431	0.00334291	0.0335676
AT4G27280	40.5752	39.0084	39.8181	62.037	132.681	75.6479	1.06367	0.362725	-2.93246	0.00336294	0.0337517
AT5G45670	287.607	261.913	356.553	442.849	477.088	373.058	0.493959	0.168459	-2.93222	0.00336544	0.0337597
AT3G23400	613.401	653.855	589.127	766.395	838.432	868.396	0.4045	0.137958	-2.93205	0.00336735	0.0337619
AT1G50600	163.494	195.042	188.231	235.741	278.536	218.653	0.408026	0.139179	-2.93167	0.00337144	0.0337688
AT1G70230	139.626	117.954	78.7313	66.8091	79.0441	65.2852	-0.641966	0.218973	2.93172	0.00337095	0.0337688
AT1G53650	47.7355	59.4414	42.533	29.5869	29.171	32.1244	-0.697589	0.23798	2.93129	0.00337561	0.0337935
AT4G25650	306.701	367.793	310.4	489.615	462.973	432.126	0.476374	0.162654	-2.92876	0.00340312	0.0340518
AT5G25130	51.3157	60.3701	28.9586	15.2706	26.348	25.9068	-0.968833	0.330857	2.92826	0.00340869	0.0340903
AT4G25420	20.2876	24.1481	22.6239	3.81766	10.351	12.4353	-1.17479	0.401502	2.926	0.00343349	0.0343106
AT5G12470	534.638	449.525	336.644	647.093	574.011	631.09	0.47856	0.163558	-2.92594	0.00343416	0.0343106
AT2G32560	196.909	244.267	203.615	164.159	146.796	134.715	-0.527517	0.180456	2.92325	0.00346398	0.0345911
AT1G78210	251.805	208.045	191.851	364.587	247.483	296.374	0.469045	0.160502	-2.92237	0.00347377	0.0346714
AT4G12470	20.2876	13.9316	15.3843	29.5869	32.935	38.3421	0.923085	0.315917	-2.92192	0.00347881	0.0346886
AT4G25260	133.659	197.828	105.88	107.849	79.0441	71.5028	-0.730532	0.250019	2.9219	0.00347898	0.0346886
AT3G17840	126.499	121.669	152.033	187.065	177.849	189.638	0.452044	0.15474	-2.92131	0.00348563	0.0347374
AT5G45050	119.339	99.3785	99.5453	160.342	143.973	132.643	0.451865	0.154776	-2.91948	0.00350611	0.034924
AT4G23260	47.7355	42.7235	60.6321	92.5783	65.8701	86.0106	0.656015	0.224716	-2.9193	0.00350816	0.0349269
[truncated: 98,033 more rows]

## Sheet: Table S10.
Table S10: List of all significant DE mRNAs generated from mRNA sequencing data. The sub-tables present all the details from control and cold treated samples after 3 h, 6 h and 2 d
3 h
	Normalized read count
Gene	Control 3 h replicate 1	Control 3 h replicate 2	Control 3 h replicate 3	Cold 3 h replicate 1	Cold 3 h replicate 2	Cold 3 h replicate 3	log2FC	Standard error	wald statistics	p-value	q-value
AT4G18422	2.38678	0	2.71487	622.279	409.336	412.436	6.78134	0.387407	-17.5044	1.32536e-68	2.02596e-65
AT4G25470	17.9008	28.7919	15.3843	1623.46	2736.43	2321.25	6.40658	0.273266	-23.4445	1.50383e-121	1.4942e-117
AT5G37260	9.5471	15.7891	12.6694	1360.04	820.553	1025.91	6.0139	0.26053	-23.0834	6.80465e-118	4.5074e-114
AT4G25480	44.1554	30.6495	25.3388	2103.53	2593.4	2382.39	5.74398	0.311847	-18.4193	9.2043e-76	1.6628e-72
AT4G25490	14.3207	9.28771	13.5744	570.74	548.604	952.334	5.42631	0.323192	-16.7898	2.90024e-63	3.03334e-60
AT1G70640	4.77355	5.57263	6.3347	582.193	343.465	523.318	5.40754	0.417362	-12.9565	2.15916e-38	9.53487e-36
AT5G45340	17.9008	32.507	33.4834	940.099	1494.31	1066.32	5.1107	0.269556	-18.9597	3.67154e-80	1.21601e-76
AT1G04570	9.5471	30.6495	19.9091	887.606	629.53	841.453	5.0146	0.250759	-19.9977	5.77191e-89	2.29399e-85
AT4G33980	10.7405	13.9316	22.6239	822.706	511.905	621.763	5.00444	0.283064	-17.6796	6.02573e-70	9.9786e-67
AT5G42900	15.514	22.2905	17.1942	902.877	401.808	446.633	4.62258	0.28762	-16.0718	4.01976e-58	3.63094e-55
AT1G11210	34.6083	47.3673	19.9091	904.785	929.709	931.609	4.52779	0.265085	-17.0805	2.0735e-65	2.4238e-62
AT4G36010	39.3818	80.8031	28.9586	1340	1337.16	1361.66	4.45433	0.300671	-14.8147	1.17795e-49	8.36006e-47
AT1G09950	4.77355	11.1453	4.52479	160.342	271.949	216.581	4.36363	0.408622	-10.6789	1.27762e-26	3.25498e-24
AT3G55580	40.5752	34.3645	38.9132	858.974	523.197	753.37	4.08727	0.216839	-18.8494	2.97364e-79	8.44174e-76
AT1G33760	2.38678	2.78631	5.42974	44.8575	122.33	108.809	3.77132	0.522334	-7.22013	5.19374e-13	3.60874e-11
AT3G50260	8.35372	12.074	5.42974	191.837	87.5131	159.586	3.67047	0.377585	-9.72091	2.45574e-22	4.64767e-20
AT5G47060	48.9289	58.5126	37.1032	864.7	540.135	601.038	3.64712	0.228792	-15.9407	3.30386e-57	2.85453e-54
AT3G55980	142.013	100.307	91.4007	978.275	1971.4	1645.6	3.60387	0.266355	-13.5303	1.03577e-41	5.27767e-39
AT5G48250	78.7636	76.1592	111.31	1477.43	860.075	1123.32	3.58567	0.194012	-18.4817	2.90032e-76	5.76352e-73
AT1G68050	120.532	110.524	84.161	1563.33	1090.62	1151.3	3.52912	0.164808	-21.4136	9.97836e-102	4.95725e-98
AT4G06665	211.23	534.043	213.57	4344.5	3500.53	4190.69	3.4865	0.245731	-14.1883	1.08298e-45	6.52153e-43
AT1G76650	21.481	46.4386	14.4793	337.863	425.333	455.96	3.47944	0.392739	-8.85944	8.04197e-19	1.0798e-16
AT1G27730	28.6413	63.1564	28.9586	443.803	611.651	564.769	3.46275	0.327158	-10.5844	3.5219e-26	8.43219e-24
AT2G17660	1.19339	6.5014	4.52479	85.8974	72.4571	105.7	3.4531	0.534227	-6.46374	1.02149e-10	4.96311e-09
AT3G21890	10.7405	1.85754	4.52479	96.3959	81.8671	102.591	3.44888	0.431238	-7.99762	1.26851e-15	1.24791e-13
AT1G07135	3.58016	8.35894	9.95453	97.3503	127.035	97.4096	3.43768	0.377215	-9.11331	7.99085e-20	1.20299e-17
AT3G07650	65.6363	44.581	50.6776	736.808	513.787	607.256	3.43397	0.199665	-17.1987	2.71785e-66	3.37557e-63
AT1G65490	35.8016	48.2961	22.6239	477.208	387.693	420.727	3.42756	0.244053	-14.0443	8.3486e-45	4.7401e-42
AT4G17090	612.208	1395.01	480.532	10844.1	8508.53	10234.2	3.40778	0.251061	-13.5735	5.75063e-42	3.00728e-39
AT1G61340	10.7405	23.2193	12.6694	210.926	123.271	273.576	3.38546	0.352305	-9.60945	7.29398e-22	1.28271e-19
AT1G60190	19.0942	32.507	14.4793	291.097	207.02	435.234	3.38083	0.391537	-8.63476	5.88514e-18	6.79939e-16
AT5G17460	62.0562	156.034	32.5785	1781.89	940.06	1088.09	3.30068	0.436763	-7.55714	4.12032e-14	3.32842e-12
AT4G17490	11.9339	5.57263	16.2892	110.712	152.442	156.477	3.28637	0.382021	-8.60259	7.79356e-18	8.84992e-16
AT1G74450	79.957	52.94	38.9132	457.165	683.167	710.883	3.27844	0.262813	-12.4744	1.02958e-35	4.09196e-33
AT1G02820	14.3207	35.2933	18.0991	260.555	298.297	295.338	3.23678	0.366146	-8.84014	9.55991e-19	1.2665e-16
AT2G41640	11.9339	11.1453	14.4793	113.575	300.179	109.845	3.21937	0.452745	-7.11078	1.15388e-12	7.54276e-11
AT1G28370	8.35372	8.35894	9.95453	125.983	68.6931	139.897	3.21368	0.424564	-7.56938	3.75023e-14	3.04182e-12
AT5G65300	3.58016	13.9316	8.14461	107.849	83.7491	111.917	3.2098	0.352685	-9.10103	8.94791e-20	1.32696e-17
AT1G70420	108.598	131.886	121.264	1375.31	1038.87	1099.49	3.20677	0.170823	-18.7724	1.26972e-78	3.15399e-75
AT5G17350	2.38678	0.928771	10.8595	47.7208	67.7521	80.8293	3.18358	0.462277	-6.88672	5.70914e-12	3.36492e-10
AT5G15950	97.8578	79.8743	58.8222	777.848	664.347	813.474	3.1799	0.18194	-17.4777	2.11826e-68	2.80627e-65
AT2G35290	7.16033	15.7891	9.04957	72.5355	207.02	141.969	3.16084	0.447364	-7.06546	1.6008e-12	1.02616e-10
AT5G17300	100.245	52.94	48.8677	879.016	504.377	613.473	3.14814	0.262432	-11.996	3.72832e-33	1.37202e-30
AT5G24470	369.95	311.138	300.446	3534.2	2658.33	2620.73	3.13127	0.125333	-24.9837	9.18995e-138	1.82623e-133
AT5G05410	13.1273	4.64386	19.0041	145.071	131.74	195.856	3.10807	0.437803	-7.09924	1.25445e-12	8.14657e-11
AT1G49220	1.19339	0	3.61983	36.2678	25.407	25.9068	3.09363	0.469313	-6.59182	4.34457e-11	2.20807e-09
AT4G33070	5.96694	2.78631	12.6694	92.5783	66.8111	73.5753	3.06812	0.319471	-9.60376	7.70783e-22	1.3436e-19
AT3G17609	16.7074	13.9316	12.6694	156.524	114.802	121.244	3.01418	0.249712	-12.0706	1.50996e-33	5.66149e-31
AT5G17305	11.9339	11.1453	0	129.8	50.8141	86.0106	2.98302	0.433323	-6.88406	5.81689e-12	3.40983e-10
AT4G07905	10.7405	8.35894	10.8595	111.667	80.9261	95.3371	2.97798	0.33356	-8.92787	4.34292e-19	5.91113e-17
AT4G24570	35.8016	33.4358	34.3884	215.698	396.162	354.405	2.9771	0.331674	-8.976	2.80799e-19	3.92961e-17
AT5G49480	184.975	217.332	91.4007	1452.62	1138.61	1588.61	2.95267	0.243392	-12.1313	7.20576e-34	2.75371e-31
AT4G33920	122.919	165.321	121.264	989.728	1086.86	1209.33	2.94164	0.168261	-17.4826	1.94346e-68	2.7586e-65
AT2G16890	13.1273	13.0028	17.1942	135.527	121.389	119.171	2.93587	0.270176	-10.8665	1.66454e-27	4.53119e-25
AT5G01100	25.0611	30.6495	19.9091	247.193	156.206	227.98	2.93442	0.258235	-11.3634	6.36384e-30	1.97597e-27
AT1G77120	35.8016	18.5754	17.1942	242.421	160.911	181.348	2.93042	0.214244	-13.678	1.37488e-42	7.38424e-40
AT4G16563	11.9339	10.2165	9.04957	81.1253	167.498	102.591	2.90271	0.449424	-6.45875	1.05575e-10	5.09497e-09
AT5G19240	120.532	86.3757	109.5	748.261	903.361	930.573	2.88449	0.257852	-11.1866	4.74218e-29	1.40652e-26
AT3G29000	2.38678	1.85754	5.42974	38.1766	24.466	49.7411	2.84615	0.48056	-5.92257	3.16946e-09	1.27756e-07
AT3G05800	105.018	110.524	99.5453	994.5	686.931	720.209	2.84206	0.198794	-14.2965	2.30045e-46	1.47466e-43
AT5G63130	4.77355	13.0028	6.3347	67.7635	95.9821	75.6479	2.83502	0.412289	-6.8763	6.14279e-12	3.57975e-10
AT2G06615	17.9008	12.074	5.42974	110.712	89.3951	94.3008	2.83244	0.327845	-8.63957	5.64237e-18	6.55702e-16
AT3G23170	96.6644	67.8003	118.549	555.47	846.901	751.298	2.80346	0.243418	-11.517	1.08267e-30	3.58581e-28
AT3G59350	134.853	205.258	213.57	1280.82	1509.37	1466.33	2.79174	0.260273	-10.7262	7.66822e-27	1.979e-24
AT4G27652	21.481	12.074	3.61983	112.621	98.8051	97.4096	2.779	0.37331	-7.4442	9.75341e-14	7.36958e-12
AT1G80840	33.4149	44.581	16.2892	244.33	191.023	304.664	2.77825	0.322631	-8.61122	7.2286e-18	8.25556e-16
AT2G16365	167.074	210.831	163.797	1614.87	1108.5	1148.19	2.77097	0.170784	-16.225	3.35918e-59	3.17874e-56
AT5G46710	59.6694	117.025	69.6817	794.073	394.28	663.214	2.76949	0.250015	-11.0773	1.61638e-28	4.72364e-26
AT1G18740	194.522	228.478	173.752	1061.31	1761.55	1436.27	2.76758	0.186324	-14.8536	6.5948e-50	4.85378e-47
AT1G35140	22.6744	38.0796	16.2892	150.798	913.712	291.193	2.76514	0.583059	-4.74247	2.11125e-06	5.09779e-05
AT3G28340	28.6413	27.8631	19.9091	180.384	201.374	172.021	2.75475	0.237377	-11.6049	3.88929e-31	1.30996e-28
AT4G19230	33.4149	56.655	11.7644	270.099	398.044	157.513	2.72973	0.362015	-7.54037	4.68634e-14	3.74392e-12
AT1G49450	5.96694	11.1453	11.7644	77.3076	74.3391	81.8655	2.70741	0.350949	-7.71452	1.21439e-14	1.04469e-12
AT4G02330	51.3157	27.8631	38.0082	232.877	350.994	277.721	2.68223	0.313075	-8.56738	1.0587e-17	1.19537e-15
AT4G17615	71.6033	70.5866	57.9173	397.991	348.17	651.815	2.67884	0.258314	-10.3705	3.37832e-25	7.45933e-23
AT3G45970	70.4099	67.8003	103.165	494.387	1255.3	607.256	2.67085	0.475801	-5.61337	1.98421e-08	6.91757e-07
AT4G34150	136.046	139.316	123.074	714.857	1029.46	1023.84	2.66609	0.256902	-10.3778	3.12759e-25	6.98331e-23
AT2G46830	216.003	232.193	148.413	1482.21	1157.43	1250.78	2.66537	0.143824	-18.5321	1.13694e-76	2.51037e-73
AT5G54470	17.9008	17.6467	22.6239	98.3047	167.498	162.695	2.64888	0.333421	-7.94454	1.94913e-15	1.87116e-13
AT3G01795	36.995	55.7263	19.9091	397.991	267.244	188.602	2.64641	0.35816	-7.38892	1.4803e-13	1.10589e-11
AT1G48100	19.0942	71.5154	31.6735	336.908	269.126	362.695	2.61992	0.387813	-6.75563	1.42218e-11	7.67976e-10
AT3G09032	4.77355	6.5014	7.23966	56.3105	46.1091	39.3784	2.59465	0.382177	-6.78912	1.12822e-11	6.26255e-10
AT1G09070	354.436	465.314	304.971	1848.7	2460.72	2804.15	2.59291	0.193244	-13.4179	4.75284e-41	2.24877e-38
AT1G01060	184.975	139.316	108.595	899.059	769.739	1049.74	2.58148	0.198631	-12.9964	1.28299e-38	5.79444e-36
AT5G45630	0	2.78631	4.52479	35.3134	21.643	43.5234	2.5661	0.580573	-4.41995	9.87237e-06	0.000205643
AT4G29780	32.2215	52.94	27.1487	168.931	280.418	287.047	2.56113	0.296999	-8.62338	6.50081e-18	7.46728e-16
AT3G20600	47.7355	21.3617	25.3388	209.971	167.498	227.98	2.5557	0.282424	-9.04917	1.44059e-19	2.10496e-17
AT4G18010	139.626	200.615	109.5	980.184	1171.55	666.323	2.53873	0.238599	-10.6402	1.93796e-26	4.75445e-24
AT1G76590	34.6083	77.088	61.5371	454.302	303.943	344.042	2.5377	0.242329	-10.4721	1.16019e-25	2.65003e-23
AT1G12420	19.0942	25.0768	28.9586	143.162	191.023	132.643	2.53091	0.249118	-10.1595	3.00603e-24	6.35487e-22
AT5G59820	9.5471	15.7891	6.3347	71.5811	76.2211	64.2489	2.52477	0.329949	-7.65201	1.97864e-14	1.66609e-12
AT1G75860	93.0843	144.888	98.6403	790.256	652.114	584.458	2.52169	0.179342	-14.0608	6.61388e-45	3.86562e-42
AT1G13260	295.96	336.215	252.483	1618.69	1985.51	1760.63	2.51572	0.212481	-11.8398	2.43144e-32	8.42201e-30
AT5G47230	17.9008	19.5042	16.2892	120.256	139.268	101.555	2.50826	0.34415	-7.28828	3.13944e-13	2.24413e-11
AT1G70800	13.1273	5.57263	7.23966	50.584	52.6961	72.5391	2.4781	0.377437	-6.5656	5.18224e-11	2.62708e-09
AT1G53035	27.4479	45.5098	31.6735	307.322	127.035	216.581	2.47397	0.274133	-9.02471	1.80177e-19	2.61348e-17
AT3G04640	9.5471	9.28771	11.7644	60.1281	63.0471	79.793	2.46983	0.372493	-6.63056	3.34418e-11	1.7172e-09
AT5G39240	2.38678	8.35894	5.42974	65.8546	25.407	43.5234	2.46441	0.442991	-5.56312	2.64991e-08	9.06351e-07
AT2G35710	19.0942	17.6467	26.2438	86.8518	175.026	153.368	2.46345	0.375309	-6.56379	5.24568e-11	2.65247e-09
AT3G11020	16.7074	20.433	21.719	164.159	96.9231	99.4822	2.4619	0.274423	-8.97119	2.93319e-19	4.07612e-17
AT1G08890	119.339	163.464	126.694	897.15	793.264	655.96	2.45744	0.172915	-14.2118	7.7369e-46	4.80461e-43
AT1G07587	33.4149	37.1509	52.4875	342.635	176.908	225.907	2.45544	0.262668	-9.34809	8.92416e-21	1.46563e-18
AT4G27657	11.9339	0.928771	5.42974	39.131	39.5221	41.4509	2.44584	0.363538	-6.72789	1.72142e-11	9.17105e-10
AT1G20030	59.6694	61.2989	47.9627	389.401	281.359	303.628	2.43914	0.236202	-10.3265	5.34936e-25	1.16816e-22
AT4G18280	34.6083	103.094	33.4834	325.456	335.937	387.566	2.43381	0.308681	-7.88454	3.15704e-15	2.94538e-13
AT2G40140	128.886	120.74	59.7272	589.828	483.675	696.375	2.43244	0.226059	-10.7602	5.30338e-27	1.3867e-24
AT5G51990	2.38678	2.78631	4.52479	20.0427	24.466	44.5597	2.42866	0.566878	-4.28427	1.83337e-05	0.000360402
AT4G03125	1.19339	0.928771	7.23966	35.3134	31.053	27.9794	2.42177	0.499689	-4.84655	1.25624e-06	3.21288e-05
AT3G60520	41.7686	48.2961	23.5289	231.923	205.138	205.182	2.41801	0.222201	-10.8821	1.40325e-27	3.87298e-25
AT5G57110	219.583	367.793	240.719	1955.6	1169.66	1509.85	2.41544	0.184625	-13.083	4.12019e-39	1.9041e-36
AT3G24520	33.4149	53.8687	38.0082	236.695	154.324	378.239	2.41076	0.327869	-7.35282	1.94075e-13	1.43405e-11
AT3G12320	199.296	176.467	134.839	969.686	849.724	955.443	2.40354	0.15615	-15.3925	1.83701e-53	1.46021e-50
AT5G10750	79.957	61.2989	43.4379	272.963	446.035	372.022	2.40081	0.306233	-7.83981	4.51223e-15	4.09438e-13
AT1G11960	65.6363	152.318	66.0619	422.806	449.799	811.401	2.40033	0.302086	-7.94584	1.92885e-15	1.86069e-13
AT3G16860	16.7074	29.7207	30.7685	104.986	270.067	136.788	2.39517	0.404707	-5.91829	3.25313e-09	1.30598e-07
AT2G28500	13.1273	17.6467	13.5744	93.5327	78.1031	93.2645	2.37872	0.333831	-7.12552	1.03689e-12	6.84557e-11
AT3G22840	3.58016	5.57263	4.52479	69.6723	41.4041	49.7411	2.36424	0.515532	-4.58602	4.51785e-06	0.000101906
AT3G52400	76.3768	63.1564	55.2024	428.532	287.005	347.151	2.36152	0.234446	-10.0727	7.29173e-24	1.50939e-21
AT1G10410	130.079	185.754	128.504	851.338	715.161	814.51	2.35569	0.187101	-12.5905	2.38183e-36	9.65952e-34
AT3G13310	102.631	81.7319	61.5371	468.618	452.622	393.784	2.34377	0.21656	-10.8227	2.68674e-27	7.11878e-25
AT2G32210	7.16033	13.9316	8.14461	83.9885	57.4011	66.3214	2.34103	0.469747	-4.98359	6.24149e-07	1.67836e-05
AT1G19020	19.0942	22.2905	15.3843	125.983	73.3981	117.099	2.33603	0.299609	-7.79694	6.3427e-15	5.65212e-13
AT3G56880	120.532	100.307	133.934	553.561	647.409	697.411	2.33581	0.220799	-10.5789	3.73269e-26	8.83049e-24
AT5G57560	186.169	171.823	199.996	713.902	2392.97	1011.4	2.33364	0.487832	-4.78369	1.72106e-06	4.25915e-05
AT4G33985	8.35372	12.074	7.23966	91.6238	32.935	49.7411	2.33318	0.388129	-6.01136	1.83971e-09	7.71281e-08
AT2G31380	268.512	253.555	161.082	1277.01	1045.45	1183.42	2.32119	0.1573	-14.7564	2.79756e-49	1.917e-46
AT4G24240	42.962	25.0768	43.4379	237.649	184.436	174.094	2.32097	0.23932	-9.69817	3.06951e-22	5.75445e-20
AT5G61380	128.886	151.39	177.372	925.783	618.238	820.728	2.31212	0.159481	-14.4978	1.25147e-47	8.28975e-45
AT1G02660	103.825	161.606	124.884	539.244	653.055	873.578	2.30793	0.239061	-9.65413	4.72134e-22	8.52931e-20
AT2G08780	73.9901	67.8003	34.3884	274.872	275.713	364.768	2.30012	0.236204	-9.73784	2.07924e-22	3.97295e-20
AT5G17850	15.514	50.1536	21.719	116.439	161.852	208.291	2.29491	0.303964	-7.54995	4.35409e-14	3.50301e-12
AT1G47710	97.8578	124.455	105.88	669.999	444.153	552.333	2.29289	0.153817	-14.9066	2.98619e-50	2.28237e-47
AT3G55880	60.8628	62.2277	45.2479	326.41	305.825	291.193	2.29284	0.306836	-7.47253	7.86647e-14	6.08259e-12
AT2G22500	105.018	177.395	86.8759	556.424	640.822	704.665	2.2922	0.208675	-10.9846	4.53471e-28	1.306e-25
AT2G24600	33.4149	39.9372	42.533	218.561	173.144	212.436	2.28386	0.239569	-9.5332	1.52509e-21	2.54678e-19
AT4G02380	108.598	40.8659	30.7685	385.584	326.527	248.705	2.27755	0.289238	-7.87431	3.42639e-15	3.18174e-13
AT1G51090	13.1273	168.108	29.8636	540.199	486.498	627.981	2.2676	0.524144	-4.32628	1.51648e-05	0.000302565
AT3G24518	40.5752	55.7263	44.3429	237.649	157.147	369.949	2.26506	0.315617	-7.17662	7.14562e-13	4.82986e-11
AT5G01815	29.8347	36.2221	38.9132	157.478	182.554	219.69	2.25866	0.31458	-7.1799	6.97614e-13	4.73139e-11
AT2G36220	101.438	118.883	76.9214	457.165	460.15	562.696	2.25727	0.196452	-11.4902	1.47769e-30	4.73624e-28
AT3G46640	69.2165	83.5894	89.5908	528.746	345.347	353.369	2.25121	0.212542	-10.5918	3.25157e-26	7.87991e-24
AT5G50450	66.8297	73.3729	105.88	499.159	397.103	335.752	2.24768	0.195511	-11.4964	1.37461e-30	4.47806e-28
AT2G27080	26.2545	39.9372	18.0991	104.986	256.893	145.078	2.24654	0.435185	-5.16226	2.43988e-07	7.16178e-06
AT2G21320	48.9289	40.8659	58.8222	293.96	182.554	283.939	2.24107	0.240484	-9.319	1.17443e-20	1.89741e-18
AT5G49330	3.58016	5.57263	9.04957	41.9943	37.6401	31.0882	2.23936	0.368348	-6.07947	1.20578e-09	5.16407e-08
AT5G66210	112.178	97.521	112.215	375.085	698.223	557.515	2.23066	0.256801	-8.68634	3.743e-18	4.48077e-16
AT5G20830	136.046	104.022	51.5826	707.222	366.05	451.815	2.22256	0.293192	-7.58056	3.44071e-14	2.81374e-12
AT5G16200	3.58016	6.5014	6.3347	25.7692	39.5221	34.197	2.21467	0.404981	-5.46858	4.53659e-08	1.50002e-06
AT5G19875	4.77355	7.43017	14.4793	69.6723	45.1681	43.5234	2.21212	0.390021	-5.67179	1.41312e-08	5.09646e-07
AT5G26010	10.7405	15.7891	10.8595	58.2193	95.9821	54.9224	2.21051	0.366186	-6.03657	1.57427e-09	6.62795e-08
AT4G25433	1.19339	21.3617	4.52479	35.3134	58.3421	104.664	2.20943	0.512035	-4.315	1.596e-05	0.000316841
AT4G33465	20.2876	40.8659	10.8595	196.609	84.6901	138.861	2.20452	0.428733	-5.14194	2.71911e-07	7.8882e-06
AT5G63160	115.759	204.33	209.045	1032.68	909.948	759.588	2.20405	0.28373	-7.76812	7.96595e-15	7.0044e-13
AT3G52800	151.56	128.17	114.93	476.253	833.727	675.65	2.20318	0.278963	-7.89773	2.84019e-15	2.67489e-13
AT3G54000	4.77355	10.2165	16.2892	33.4045	125.153	50.7774	2.20086	0.492615	-4.4677	7.90641e-06	0.000168399
AT4G39070	3.58016	24.1481	9.95453	97.3503	74.3391	52.8499	2.19263	0.416012	-5.27059	1.35985e-07	4.15737e-06
AT2G30040	16.7074	30.6495	9.95453	63.9458	125.153	140.933	2.19195	0.419642	-5.22339	1.75677e-07	5.28146e-06
AT3G61190	8.35372	9.28771	3.61983	30.5413	50.8141	35.2333	2.18981	0.396515	-5.52265	3.33928e-08	1.13046e-06
AT3G51238	33.4149	36.2221	31.6735	125.983	191.023	169.949	2.17991	0.204338	-10.6681	1.43474e-26	3.60902e-24
AT5G24030	73.9901	81.7319	79.6362	235.741	702.928	266.322	2.17879	0.321492	-6.77713	1.22585e-11	6.74795e-10
AT5G10695	29.8347	45.5098	42.533	171.795	191.023	232.125	2.17639	0.317626	-6.85204	7.2805e-12	4.23035e-10
AT2G02120	0	1.85754	4.52479	15.2706	15.997	20.7254	2.17634	0.458028	-4.75156	2.01856e-06	4.90376e-05
AT5G14760	44.1554	27.8631	34.3884	159.387	155.265	203.109	2.1757	0.248537	-8.75405	2.05824e-18	2.57241e-16
AT5G15190	16.7074	16.7179	12.6694	80.1709	61.1651	94.3008	2.16472	0.344915	-6.27609	3.47201e-10	1.58611e-08
AT4G31800	50.1223	141.173	47.9627	431.396	472.383	333.68	2.16112	0.344734	-6.26893	3.63537e-10	1.65693e-08
AT1G26790	2.38678	0	9.95453	68.7179	20.702	36.2695	2.15163	0.566378	-3.79893	0.000145325	0.00226709
AT4G27360	1.19339	1.85754	0.904957	8.58974	15.056	15.5441	2.15088	0.493187	-4.36117	1.29366e-05	0.000263669
AT1G78600	398.592	264.7	250.673	1507.98	1400.21	1258.03	2.14858	0.166094	-12.9359	2.82147e-38	1.21887e-35
AT2G38470	72.7967	81.7319	87.7808	315.911	357.581	547.152	2.14846	0.33352	-6.44176	1.18092e-10	5.66844e-09
AT4G27950	25.0611	49.2249	38.0082	192.792	149.619	196.892	2.14656	0.251135	-8.54742	1.25872e-17	1.41318e-15
AT3G15210	162.301	238.694	105.88	1015.5	591.89	829.018	2.14015	0.275853	-7.75831	8.60709e-15	7.53481e-13
AT1G07477	7.16033	32.507	11.7644	114.53	78.1031	113.99	2.13333	0.439042	-4.85907	1.17941e-06	3.03591e-05
AT1G49720	201.683	217.332	190.946	1239.79	696.341	842.49	2.12581	0.188345	-11.2868	1.5244e-29	4.58983e-27
AT2G23810	325.795	184.825	147.508	819.842	1161.2	1071.51	2.12561	0.244733	-8.68543	3.77308e-18	4.48974e-16
AT5G44565	14.3207	20.433	13.5744	108.803	61.1651	70.4665	2.12446	0.31154	-6.81923	9.15284e-12	5.16719e-10
AT3G51240	33.4149	41.7947	31.6735	126.937	192.905	174.094	2.12421	0.202053	-10.5132	7.514e-26	1.73626e-23
AT5G53290	13.1273	13.9316	17.1942	66.8091	95.9821	65.2852	2.1124	0.361704	-5.84013	5.21617e-09	1.98194e-07
AT3G03535	108.598	175.538	101.355	469.572	526.961	758.551	2.10169	0.234414	-8.96574	3.08192e-19	4.25305e-17
AT3G28875	2.38678	1.85754	2.71487	25.7692	3.76401	21.7617	2.09969	0.534251	-3.93015	8.48925e-05	0.00141288
AT5G05305	1.19339	2.78631	2.71487	22.906	12.233	33.1607	2.09744	0.594804	-3.52627	0.00042146	0.00573648
AT3G19680	415.299	274.916	220.81	1251.24	2481.42	1189.64	2.09478	0.420182	-4.98541	6.18314e-07	1.66718e-05
AT1G69870	221.97	463.457	124.884	1204.47	1358.81	1236.27	2.09477	0.290657	-7.20704	5.71811e-13	3.94549e-11
AT5G43620	25.0611	28.7919	19.0041	106.894	105.392	111.917	2.08173	0.232983	-8.93513	4.06698e-19	5.57373e-17
AT1G29690	82.3438	88.2333	77.8263	349.316	391.457	346.115	2.07908	0.183182	-11.3498	7.43384e-30	2.2727e-27
AT4G29610	15.514	6.5014	25.3388	83.9885	71.5161	76.6842	2.07766	0.360122	-5.76933	7.95894e-09	2.95075e-07
AT2G23120	324.602	916.697	224.429	2071.08	2378.85	2421.77	2.07637	0.310369	-6.68999	2.23182e-11	1.15798e-09
AT1G78070	329.375	443.024	213.57	1410.63	1232.71	1749.23	2.07176	0.235311	-8.80435	1.31615e-18	1.67657e-16
AT4G19960	107.405	113.31	88.6858	363.632	519.433	476.685	2.07038	0.209903	-9.86349	5.99311e-23	1.19095e-20
AT2G40080	5.96694	7.43017	2.71487	38.1766	24.466	29.0156	2.06982	0.432654	-4.78401	1.71829e-06	4.25813e-05
AT1G18200	11.9339	12.074	9.04957	27.678	82.8081	69.4303	2.06911	0.466178	-4.43846	9.06054e-06	0.00019134
AT5G09125	19.0942	8.35894	13.5744	80.1709	44.2271	77.7204	2.06797	0.350181	-5.90542	3.51752e-09	1.40081e-07
AT3G09600	48.9289	36.2221	30.7685	198.518	167.498	158.55	2.06681	0.272955	-7.57199	3.67546e-14	2.99339e-12
AT3G03385	8.35372	4.64386	5.42974	19.0883	59.2831	29.0156	2.05579	0.514316	-3.99714	6.41115e-05	0.00110019
AT1G79660	81.1504	88.2333	76.9214	424.715	320.881	332.643	2.05377	0.215417	-9.5339	1.51482e-21	2.54678e-19
AT2G19450	75.1834	65.014	73.3015	424.715	264.421	244.56	2.05339	0.212045	-9.68376	3.53483e-22	6.50312e-20
AT3G04010	35.8016	66.8715	37.1032	349.316	139.268	177.203	2.05166	0.339377	-6.04536	1.49077e-09	6.28971e-08
AT4G32190	153.947	313.925	190.041	932.463	856.311	1040.42	2.03871	0.200406	-10.1729	2.61936e-24	5.59698e-22
AT3G57530	150.367	148.603	139.363	406.581	867.603	636.271	2.03765	0.240411	-8.47569	2.33681e-17	2.57984e-15
AT3G27210	47.7355	50.1536	29.8636	183.248	162.793	229.016	2.03058	0.297175	-6.83296	8.31796e-12	4.76353e-10
AT1G20450	723.193	2540.19	607.226	6562.56	6075.1	6684.99	2.02769	0.402351	-5.0396	4.66494e-07	1.29472e-05
AT2G27500	88.3107	114.239	58.8222	368.404	434.743	304.664	2.02752	0.199754	-10.1501	3.31123e-24	6.9264e-22
AT5G41590	13.1273	27.8631	8.14461	137.436	54.5781	54.9224	2.02715	0.417279	-4.85804	1.18556e-06	3.04779e-05
AT1G07050	42.962	88.2333	79.6362	406.581	215.489	304.664	2.02609	0.240781	-8.41464	3.94115e-17	4.23343e-15
AT3G17800	315.054	566.55	266.962	1396.31	1427.5	2166.85	2.02253	0.257246	-7.86222	3.77373e-15	3.45583e-13
AT4G14690	2.38678	1.85754	9.95453	35.3134	15.056	36.2695	2.02228	0.421392	-4.79904	1.59428e-06	4.00525e-05
AT1G67470	16.7074	17.6467	19.0041	69.6723	83.7491	80.8293	2.02078	0.258247	-7.82497	5.07784e-15	4.56592e-13
AT3G08605	11.9339	11.1453	11.7644	48.6752	70.5751	54.9224	2.01417	0.430606	-4.67754	2.90343e-06	6.86053e-05
AT2G40130	50.1223	57.5838	40.7231	202.336	212.666	201.037	2.01009	0.169788	-11.8388	2.45811e-32	8.42201e-30
AT1G69572	66.8297	47.3673	67.8718	275.826	276.654	208.291	2.00256	0.199184	-10.0538	8.84114e-24	1.81125e-21
AT1G66725	11.9339	15.7891	10.8595	61.0826	79.9851	40.4146	2.00218	0.371427	-5.39052	7.02525e-08	2.21949e-06
AT5G14560	9.5471	8.35894	10.8595	58.2193	39.5221	36.2695	2.00111	0.350446	-5.7102	1.12846e-08	4.09959e-07
AT3G05980	17.9008	19.5042	15.3843	90.6694	70.5751	68.394	1.99969	0.267742	-7.46872	8.09784e-14	6.23722e-12
AT2G29090	34.6083	15.7891	29.8636	109.758	133.622	120.208	1.99617	0.340286	-5.86614	4.46062e-09	1.73128e-07
AT1G64890	70.4099	100.307	64.252	388.447	263.48	321.244	1.99275	0.18346	-10.862	1.74828e-27	4.69483e-25
AT4G12000	33.4149	70.5866	12.6694	172.749	144.914	214.508	1.98281	0.352759	-5.62087	1.89998e-08	6.64727e-07
AT1G01560	17.9008	3.71509	9.04957	58.2193	39.5221	49.7411	1.98073	0.426945	-4.63932	3.49563e-06	8.14363e-05
AT5G52050	11.9339	40.8659	14.4793	60.1281	128.917	130.57	1.96799	0.422046	-4.66298	3.11656e-06	7.32926e-05
AT4G15660	10.7405	21.3617	5.42974	65.8546	41.4041	63.2126	1.96195	0.362796	-5.40787	6.37801e-08	2.03768e-06
AT1G49225	42.962	30.6495	63.347	200.427	194.787	174.094	1.96113	0.239996	-8.17149	3.04611e-16	3.15272e-14
AT1G16130	1.19339	0.928771	14.4793	35.3134	56.4601	22.798	1.95699	0.561291	-3.48658	0.000489233	0.00654683
AT2G36690	4.77355	8.35894	8.14461	20.0427	31.053	67.3577	1.95688	0.509917	-3.83763	0.000124226	0.00197648
AT2G29720	29.8347	14.8603	9.95453	85.8974	57.4011	90.1557	1.95449	0.339553	-5.75607	8.60958e-09	3.1801e-07
AT3G22830	0	2.78631	4.52479	15.2706	18.82	17.6166	1.95024	0.538593	-3.621	0.00029347	0.00415966
AT4G30280	27.4479	60.3701	25.3388	104.986	300.179	166.84	1.94757	0.466738	-4.17272	3.00983e-05	0.000560556
AT4G23750	48.9289	46.4386	68.7767	241.467	296.415	144.042	1.94448	0.258965	-7.50865	5.97389e-14	4.69331e-12
AT3G46620	34.6083	58.5126	38.9132	136.481	216.43	188.602	1.94371	0.240047	-8.09719	5.62441e-16	5.68129e-14
AT1G77760	467.808	689.148	437.999	2463.35	1690.98	2224.88	1.94214	0.195811	-9.91846	3.46048e-23	7.017e-21
AT5G52750	35.8016	11.1453	10.8595	128.846	93.1591	66.3214	1.94209	0.456002	-4.25894	2.05395e-05	0.000399766
AT1G69570	90.6975	63.1564	88.6858	368.404	356.64	243.524	1.93794	0.200142	-9.68283	3.56703e-22	6.50312e-20
AT1G32900	167.074	177.395	119.454	469.572	762.211	597.929	1.93714	0.177453	-10.9164	9.62582e-28	2.69414e-25
AT3G47420	93.0843	107.737	37.1032	300.641	326.527	390.675	1.93339	0.323593	-5.97475	2.3045e-09	9.48136e-08
AT4G08040	15.514	13.9316	12.6694	37.2222	91.2771	53.8862	1.92107	0.378544	-5.07491	3.87682e-07	1.09432e-05
AT4G08985	2.38678	0.928771	5.42974	8.58974	28.23	24.8705	1.91497	0.589002	-3.25121	0.00114915	0.0137071
AT4G11590	1.19339	2.78631	5.42974	15.2706	15.997	20.7254	1.91399	0.512441	-3.73506	0.000187674	0.00285127
AT5G04340	46.5421	65.014	18.0991	210.926	128.917	231.089	1.90971	0.381668	-5.00359	5.62718e-07	1.52973e-05
AT1G68500	3.58016	32.507	5.42974	66.8091	63.9881	64.2489	1.90682	0.414763	-4.59736	4.2787e-06	9.70621e-05
AT1G09015	8.35372	6.5014	17.1942	44.8575	45.1681	47.6685	1.89743	0.340576	-5.57124	2.52933e-08	8.71105e-07
AT5G06710	23.8678	29.7207	25.3388	99.2592	106.333	112.954	1.89618	0.274053	-6.91901	4.54802e-12	2.72223e-10
AT1G66500	15.514	19.5042	17.1942	63.9458	84.6901	63.2126	1.89371	0.278954	-6.78863	1.13203e-11	6.26624e-10
AT2G46790	137.24	139.316	95.0205	537.336	393.339	510.882	1.8931	0.214845	-8.81147	1.23512e-18	1.5835e-16
AT4G35985	10.7405	35.2933	18.0991	87.8062	99.7461	109.845	1.88988	0.44743	-4.22387	2.40141e-05	0.000458413
AT2G44940	157.527	175.538	113.12	733.945	562.719	437.307	1.88813	0.218447	-8.64344	5.45431e-18	6.37577e-16
AT1G69900	19.0942	11.1453	19.0041	62.037	86.5721	56.995	1.88382	0.36027	-5.22892	1.70506e-07	5.13377e-06
AT4G27820	206.456	187.612	200.9	912.421	686.931	649.743	1.87952	0.154571	-12.1596	5.10168e-34	1.98786e-31
AT5G24590	106.212	114.239	85.066	334.045	352.876	493.266	1.87806	0.231945	-8.09702	5.63211e-16	5.68129e-14
AT1G36622	1.19339	7.43017	1.80991	26.7236	15.997	15.5441	1.87471	0.517205	-3.6247	0.000289295	0.00411516
AT5G47960	2.38678	3.71509	1.80991	15.2706	16.938	11.399	1.87448	0.511761	-3.6628	0.000249472	0.00362921
AT3G21150	1.19339	0.928771	9.04957	15.2706	21.643	24.8705	1.87383	0.486099	-3.85482	0.000115815	0.00186053
AT1G49230	38.1884	33.4358	57.0123	177.521	173.144	146.114	1.8723	0.22114	-8.46661	2.52639e-17	2.77373e-15
AT4G30350	119.339	226.62	134.839	576.467	556.132	697.411	1.87188	0.190686	-9.81656	9.55509e-23	1.87999e-20
AT2G02100	522.704	526.613	228.954	1591.01	1540.42	1745.08	1.87008	0.215606	-8.6736	4.18684e-18	4.95244e-16
AT3G21420	10.7405	16.7179	19.0041	96.3959	52.6961	43.5234	1.86957	0.322816	-5.79146	6.9776e-09	2.60185e-07
AT3G03225	14.3207	12.074	12.6694	61.0826	62.1061	43.5234	1.8659	0.391959	-4.76046	1.93156e-06	4.72128e-05
AT4G22780	88.3107	68.7291	73.3015	344.544	235.25	294.301	1.86508	0.214124	-8.71026	3.03168e-18	3.74196e-16
AT1G72940	42.962	45.5098	25.3388	107.849	163.734	174.094	1.86506	0.292844	-6.36877	1.90553e-10	8.95191e-09
AT1G63860	65.6363	80.8031	91.4007	251.966	367.932	291.193	1.86459	0.220397	-8.46014	2.67056e-17	2.9159e-15
AT1G19180	72.7967	276.774	60.6321	516.339	558.014	637.308	1.86448	0.364545	-5.11453	3.1452e-07	8.98007e-06
AT5G01255	152.754	73.3729	104.07	486.752	379.224	437.307	1.85858	0.290743	-6.3925	1.63193e-10	7.73976e-09
AT4G11280	99.0512	73.3729	60.6321	183.248	427.215	354.405	1.85821	0.362843	-5.12125	3.03521e-07	8.72877e-06
AT2G43290	138.433	117.025	110.405	330.228	597.536	441.452	1.85267	0.201448	-9.19674	3.68986e-20	5.64038e-18
AT2G08915	13.1273	26.0056	27.1487	78.262	101.628	93.2645	1.84378	0.345526	-5.33617	9.49286e-08	2.95215e-06
AT1G09287	46.5421	30.6495	17.1942	111.667	102.569	143.006	1.84029	0.269102	-6.83863	7.99563e-12	4.61887e-10
AT3G54020	31.0281	57.5838	42.533	145.071	145.855	212.436	1.83579	0.261943	-7.00834	2.41164e-12	1.49296e-10
AT3G45960	2.38678	1.85754	4.52479	11.453	25.407	14.5078	1.83578	0.545088	-3.36786	0.000757549	0.00961304
AT1G30282	84.7306	45.5098	69.6817	305.413	227.722	221.762	1.83349	0.24316	-7.54024	4.69121e-14	3.74392e-12
AT5G13930	192.135	215.475	106.785	450.484	719.866	823.837	1.8298	0.293006	-6.24491	4.24049e-10	1.91952e-08
AT1G67970	46.5421	44.581	36.1983	199.473	112.92	159.586	1.82969	0.226436	-8.08037	6.45703e-16	6.38379e-14
AT5G14550	101.438	111.453	92.3056	444.757	351.935	315.027	1.82776	0.154359	-11.8409	2.39771e-32	8.42201e-30
AT5G54130	59.6694	73.3729	40.7231	321.638	138.327	238.343	1.82455	0.337595	-5.40456	6.49676e-08	2.07229e-06
AT5G57220	29.8347	4.64386	10.8595	74.4444	43.2861	65.2852	1.82329	0.407403	-4.4754	7.62673e-06	0.000163142
AT5G17050	65.6363	58.5126	30.7685	211.88	161.852	198.964	1.82143	0.224975	-8.09614	5.67314e-16	5.69377e-14
AT5G17040	1.19339	5.57263	5.42974	12.4074	22.584	24.8705	1.82142	0.425737	-4.27828	1.88341e-05	0.000369103
AT1G18382	4.77355	11.1453	10.8595	39.131	36.6991	36.2695	1.82107	0.378904	-4.80616	1.53854e-06	3.88485e-05
AT1G09350	51.3157	321.355	45.2479	840.84	514.728	712.955	1.81873	0.48708	-3.73394	0.000188505	0.00285735
AT2G37970	15.514	30.6495	26.2438	83.0341	107.274	101.555	1.81814	0.343242	-5.29696	1.17749e-07	3.62214e-06
AT1G32920	72.7967	78.0168	55.2024	219.515	361.345	209.327	1.80686	0.31099	-5.81002	6.24641e-09	2.34648e-07
AT5G43260	62.0562	70.5866	64.252	203.29	274.772	238.343	1.80578	0.195438	-9.23966	2.47286e-20	3.83911e-18
AT3G51920	263.739	209.902	153.843	800.754	717.984	722.282	1.80477	0.165286	-10.919	9.34807e-28	2.65378e-25
AT2G16700	66.8297	78.9456	35.2933	229.06	201.374	226.944	1.80431	0.212808	-8.47862	2.27873e-17	2.52977e-15
AT4G29190	397.398	377.081	260.628	1328.55	1244.94	1165.81	1.80227	0.196244	-9.18384	4.15997e-20	6.31045e-18
AT3G14590	16.7074	22.2905	30.7685	85.8974	74.3391	113.99	1.79998	0.335033	-5.37256	7.76274e-08	2.43699e-06
AT2G31360	971.418	899.979	742.065	3673.54	2806.07	2776.17	1.79925	0.128166	-14.0384	9.07156e-45	5.0075e-42
AT1G22570	107.405	142.102	135.744	445.712	605.064	408.291	1.79418	0.300246	-5.97569	2.29116e-09	9.44606e-08
AT4G08950	66.8297	94.7347	90.4957	112.621	955.116	237.306	1.79222	0.525104	-3.41308	0.000642332	0.00835915
AT3G02380	175.428	102.165	107.69	502.977	429.097	417.618	1.792	0.151117	-11.8583	1.94808e-32	7.03858e-30
AT4G30290	17.9008	13.0028	34.3884	80.1709	99.7461	101.555	1.79181	0.42698	-4.19647	2.71106e-05	0.000512111
AT4G32020	976.191	948.275	797.267	3006.41	3277.51	3236.28	1.79007	0.107779	-16.6086	6.0366e-62	5.99796e-59
AT1G68568	27.4479	17.6467	15.3843	79.2164	82.8081	59.0675	1.78992	0.257396	-6.95397	3.5515e-12	2.16632e-10
AT1G17665	13.1273	27.8631	29.8636	133.618	53.6371	90.1557	1.78903	0.306132	-5.84398	5.09691e-09	1.95156e-07
AT5G63790	106.212	128.17	47.9627	346.453	318.999	370.986	1.78827	0.258711	-6.91223	4.77087e-12	2.84705e-10
AT5G66070	41.7686	27.8631	27.1487	83.0341	104.451	168.912	1.77963	0.301473	-5.90311	3.56709e-09	1.4177e-07
AT1G09897	25.0611	29.7207	27.1487	106.894	96.9231	98.4459	1.77406	0.27256	-6.50889	7.57104e-11	3.75191e-09
AT1G69890	106.212	57.5838	57.0123	275.826	230.545	264.249	1.77387	0.194759	-9.10805	8.38792e-20	1.25327e-17
AT4G22770	13.1273	12.074	14.4793	64.9002	35.7581	50.7774	1.76928	0.31092	-5.69046	1.26695e-08	4.59432e-07
AT4G34550	5.96694	4.64386	9.95453	21.9515	39.5221	24.8705	1.76898	0.412903	-4.28425	1.83356e-05	0.000360402
AT3G27880	40.5752	43.6522	29.8636	144.117	122.33	138.861	1.76869	0.21777	-8.12183	4.59205e-16	4.67965e-14
AT1G78440	8.35372	2.78631	9.95453	30.5413	40.4631	19.6892	1.76238	0.479282	-3.67713	0.000235871	0.00347202
AT2G40340	7.16033	5.57263	8.14461	30.5413	26.348	26.9431	1.75972	0.350407	-5.02192	5.11579e-07	1.40416e-05
AT5G63340	39.3818	46.4386	26.2438	159.387	126.094	115.026	1.75107	0.256763	-6.81978	9.11789e-12	5.16213e-10
AT5G07920	76.3768	143.031	79.6362	307.322	294.533	474.613	1.75099	0.267994	-6.53371	6.41607e-11	3.1875e-09
AT4G22758	8.35372	14.8603	9.04957	40.0854	39.5221	49.7411	1.74159	0.395581	-4.40261	1.06956e-05	0.00022105
AT2G30020	47.7355	66.8715	52.4875	149.843	200.433	232.125	1.73739	0.221856	-7.83116	4.83376e-15	4.36621e-13
AT5G08760	35.8016	21.3617	70.5867	165.114	151.501	158.55	1.73665	0.316731	-5.48303	4.18109e-08	1.39174e-06
AT1G70090	237.484	249.839	222.619	559.287	1122.61	831.091	1.73529	0.259132	-6.69657	2.13374e-11	1.11583e-09
AT3G49530	110.985	87.3045	87.7808	294.914	341.583	338.861	1.73396	0.180963	-9.58187	9.53001e-22	1.63259e-19
AT4G24960	47.7355	416.09	61.5371	924.828	580.598	773.059	1.73367	0.472448	-3.66954	0.000242984	0.00355815
AT2G45080	21.481	21.3617	19.0041	89.715	61.1651	69.4303	1.72983	0.281843	-6.13758	8.37865e-10	3.69181e-08
AT2G17230	224.357	126.313	274.202	713.902	1076.51	479.794	1.7296	0.298648	-5.79144	6.97861e-09	2.60185e-07
AT3G19030	100.245	97.521	141.173	448.575	325.586	416.582	1.72884	0.238481	-7.24941	4.18598e-13	2.94978e-11
AT1G33610	32.2215	28.7919	31.6735	148.889	81.8671	95.3371	1.72879	0.266855	-6.47841	9.26929e-11	4.52578e-09
AT1G30280	108.598	65.9428	90.4957	369.359	274.772	277.721	1.72645	0.230903	-7.47695	7.60656e-14	5.92775e-12
AT1G62570	46.5421	87.3045	30.7685	307.322	243.719	169.949	1.72609	0.451258	-3.82506	0.000130742	0.00206614
AT5G52570	58.476	73.3729	36.1983	224.288	182.554	173.058	1.72596	0.224784	-7.67831	1.61195e-14	1.36892e-12
AT5G37770	54.8958	71.5154	67.8718	132.664	318.058	243.524	1.7258	0.285124	-6.05283	1.42327e-09	6.04344e-08
AT4G31550	126.499	128.17	119.454	383.675	497.79	383.421	1.72002	0.173652	-9.90497	3.96088e-23	7.95057e-21
AT5G20230	210.036	370.58	146.603	772.122	924.063	896.376	1.7164	0.303152	-5.66184	1.49755e-08	5.36202e-07
AT5G62900	32.2215	53.8687	38.9132	201.382	112.92	125.389	1.71269	0.252871	-6.77301	1.26131e-11	6.90491e-10
AT5G04720	116.952	98.4498	74.2065	270.099	398.044	309.845	1.71127	0.204156	-8.38218	5.19577e-17	5.49204e-15
AT1G27200	68.0231	152.318	76.9214	371.267	329.35	331.607	1.71079	0.239388	-7.14652	8.90048e-13	5.97535e-11
AT4G23180	188.555	129.099	115.835	589.828	405.572	487.048	1.70701	0.234117	-7.29125	3.07082e-13	2.20301e-11
AT5G42760	16.7074	19.5042	20.814	58.2193	62.1061	81.8655	1.69881	0.25977	-6.53966	6.1657e-11	3.07851e-09
AT1G27770	226.744	250.768	155.653	666.182	790.441	655.96	1.6982	0.183055	-9.27699	1.74341e-20	2.7716e-18
AT5G26920	68.0231	37.1509	51.5826	176.567	201.374	196.892	1.69529	0.363555	-4.66309	3.11498e-06	7.32926e-05
AT5G06320	373.53	204.33	210.855	978.275	762.211	950.262	1.69381	0.246127	-6.88184	5.90826e-12	3.4532e-10
AT1G19370	131.273	117.954	112.215	437.122	367.932	378.239	1.69366	0.125586	-13.4861	1.88897e-41	9.3844e-39
AT5G36925	3.58016	12.074	8.14461	35.3134	31.053	33.1607	1.68669	0.496042	-3.4003	0.000673113	0.00869143
AT3G14050	305.507	268.415	199.091	983.047	672.816	893.267	1.68466	0.176631	-9.53773	1.45998e-21	2.47972e-19
AT2G34090	62.0562	57.5838	62.442	166.068	222.076	221.762	1.68321	0.224543	-7.49615	6.57178e-14	5.14151e-12
AT2G41010	19.0942	8.35894	13.5744	26.7236	57.4011	70.4665	1.683	0.41895	-4.01718	5.88996e-05	0.0010169
AT2G30250	96.6644	78.0168	74.2065	378.903	228.663	224.871	1.68265	0.219177	-7.67712	1.62706e-14	1.37587e-12
AT4G16610	4.77355	3.71509	4.52479	22.906	10.351	20.7254	1.68195	0.429742	-3.91386	9.08337e-05	0.00149921
AT4G28330	4.77355	2.78631	6.3347	20.9971	20.702	16.5804	1.67928	0.43697	-3.84302	0.000121529	0.00193822
AT1G76580	115.759	260.985	105.88	620.37	444.153	555.442	1.67652	0.230952	-7.25917	3.8948e-13	2.7741e-11
AT1G66160	13.1273	32.507	13.5744	44.8575	105.392	69.4303	1.67507	0.40922	-4.09331	4.25258e-05	0.000762701
AT4G01360	5.96694	7.43017	1.80991	20.9971	23.525	27.9794	1.67004	0.562885	-2.96693	0.00300788	0.0308903
AT5G20150	79.957	76.1592	89.5908	228.105	398.044	227.98	1.66864	0.304515	-5.47966	4.26148e-08	1.41612e-06
AT5G54710	113.372	85.447	76.9214	310.185	362.286	247.669	1.66576	0.247042	-6.74282	1.55338e-11	8.29807e-10
AT5G42050	426.04	411.446	360.173	1252.19	1323.05	1355.44	1.66474	0.198262	-8.39666	4.59362e-17	4.88152e-15
AT1G78290	23.8678	17.6467	10.8595	53.4472	63.0471	59.0675	1.66169	0.269884	-6.15705	7.41116e-10	3.30954e-08
AT4G35480	27.4479	35.2933	26.2438	100.214	94.1001	102.591	1.66155	0.260254	-6.38435	1.72125e-10	8.12464e-09
AT1G19050	151.56	172.751	96.8304	617.507	313.353	459.069	1.65869	0.226543	-7.32171	2.44824e-13	1.78211e-11
AT5G45610	48.9289	65.014	51.5826	206.154	174.085	161.659	1.65768	0.19058	-8.69812	3.37421e-18	4.06377e-16
AT4G35485	21.481	22.2905	19.0041	65.8546	61.1651	81.8655	1.65607	0.282105	-5.87042	4.34703e-09	1.69049e-07
AT2G41410	212.423	143.031	120.359	378.903	722.689	478.758	1.6511	0.261108	-6.32345	2.55781e-10	1.18482e-08
AT1G32860	25.0611	85.447	38.0082	259.601	105.392	161.659	1.65068	0.345771	-4.77391	1.80687e-06	4.44997e-05
AT3G62690	35.8016	27.8631	32.5785	122.165	105.392	92.2283	1.64938	0.268066	-6.1529	7.608e-10	3.38224e-08
AT2G27260	34.6083	34.3645	66.0619	161.296	142.091	147.151	1.64892	0.238775	-6.90575	4.99399e-12	2.97127e-10
AT5G49520	15.514	44.581	20.814	76.3532	127.976	89.1194	1.64785	0.399267	-4.12718	3.67242e-05	0.000670756
AT5G22690	32.2215	23.2193	29.8636	66.8091	143.973	82.9018	1.6447	0.331824	-4.95654	7.17601e-07	1.90644e-05
AT3G61640	40.5752	30.6495	36.1983	137.436	127.035	90.1557	1.64443	0.253148	-6.49592	8.25258e-11	4.04927e-09
AT2G41100	421.266	343.645	272.392	1316.14	1071.8	979.278	1.6425	0.213494	-7.69345	1.43223e-14	1.22152e-12
AT1G77640	7.16033	5.57263	9.95453	20.0427	53.6371	21.7617	1.64121	0.519915	-3.15668	0.00159577	0.0181934
AT1G55960	147.98	147.675	126.694	408.49	443.212	500.52	1.64103	0.177462	-9.24724	2.30367e-20	3.60462e-18
AT1G30040	26.2545	30.6495	17.1942	53.4472	131.74	75.6479	1.63912	0.37693	-4.34862	1.36999e-05	0.0002778
AT5G37440	11.9339	8.35894	12.6694	53.4472	37.6401	26.9431	1.63671	0.385369	-4.24713	2.16529e-05	0.000416944
AT2G45680	21.481	35.2933	47.9627	145.071	154.324	70.4665	1.63562	0.33602	-4.86761	1.12956e-06	2.93259e-05
AT2G09335	8.35372	8.35894	6.3347	33.4045	24.466	27.9794	1.63023	0.401351	-4.06186	4.86823e-05	0.000864535
AT1G58420	4.77355	5.57263	2.71487	20.0427	12.233	17.6166	1.62877	0.471111	-3.4573	0.000545614	0.00723838
AT1G01520	2.38678	0.928771	8.14461	11.453	25.407	18.6529	1.62449	0.507642	-3.20007	0.00137393	0.0159665
AT2G40900	19.0942	12.074	14.4793	40.0854	46.1091	66.3214	1.62216	0.307021	-5.28355	1.26707e-07	3.87969e-06
AT1G67856	2.38678	0.928771	4.52479	9.54415	13.174	20.7254	1.62145	0.573979	-2.82493	0.00472912	0.0439967
AT4G14365	70.4099	38.0796	32.5785	216.652	142.091	127.462	1.62069	0.356025	-4.55217	5.30953e-06	0.000117758
AT4G35320	105.018	116.096	72.3966	308.276	364.168	254.923	1.61965	0.186084	-8.70384	3.20851e-18	3.90392e-16
AT1G22110	7.16033	0.928771	6.3347	14.3162	22.584	21.7617	1.61939	0.480909	-3.36735	0.000758953	0.00961857
AT1G65390	13.1273	91.9484	13.5744	218.561	110.097	198.964	1.61748	0.543316	-2.97706	0.00291031	0.0300748
AT1G64760	64.443	74.3017	89.5908	251.011	223.958	249.742	1.61692	0.166856	-9.69049	3.3094e-22	6.14621e-20
AT1G25400	10.7405	27.8631	25.3388	81.1253	74.3391	65.2852	1.61533	0.351037	-4.60158	4.19297e-06	9.54442e-05
AT5G00365	2.38678	0.928771	4.52479	11.453	14.115	9.32645	1.61306	0.494057	-3.26493	0.00109491	0.0131628
AT4G32800	40.5752	148.603	30.7685	246.239	278.536	232.125	1.61229	0.35965	-4.48293	7.36248e-06	0.000159203
AT1G49210	3.58016	5.57263	4.52479	33.4045	10.351	11.399	1.60824	0.446273	-3.60373	0.000313687	0.00441473
AT5G37550	1.19339	2.78631	1.80991	4.77208	14.115	12.4353	1.6074	0.544421	-2.95249	0.00315225	0.0320178
AT1G10550	9.5471	6.5014	18.0991	62.9914	61.1651	42.4872	1.60693	0.540523	-2.97292	0.00294983	0.0304199
AT4G14580	15.514	22.2905	14.4793	56.3105	60.2241	54.9224	1.60495	0.28325	-5.66621	1.4599e-08	5.25563e-07
AT4G13800	33.4149	44.581	34.3884	111.667	170.321	88.0832	1.60424	0.310556	-5.1657	2.39536e-07	7.05193e-06
AT3G02370	75.1834	58.5126	54.2974	234.786	174.085	174.094	1.60225	0.176448	-9.08055	1.08024e-19	1.59012e-17
AT2G45685	21.481	34.3645	49.7726	144.117	152.442	68.394	1.59817	0.345139	-4.63052	3.64742e-06	8.45759e-05
AT2G41105	294.767	210.831	212.665	826.523	737.745	686.012	1.59655	0.208962	-7.64038	2.16585e-14	1.81602e-12
AT5G26030	207.65	124.455	112.215	383.675	515.669	517.1	1.59627	0.260502	-6.12768	8.91715e-10	3.91174e-08
AT2G42150	11.9339	12.074	10.8595	42.9487	29.171	48.7048	1.59285	0.368051	-4.3278	1.50604e-05	0.000300988
AT5G62520	29.8347	50.1536	40.7231	99.2592	164.675	133.679	1.59187	0.308333	-5.16284	2.4323e-07	7.1501e-06
AT4G38400	71.6033	44.581	47.9627	183.248	240.896	116.063	1.59151	0.318837	-4.9916	5.98802e-07	1.62338e-05
AT2G34110	60.8628	55.7263	75.1114	166.068	223.017	219.69	1.58846	0.251983	-6.30385	2.90341e-10	1.33867e-08
AT1G07180	189.749	247.053	126.694	507.749	666.229	593.784	1.58805	0.230033	-6.90357	5.07112e-12	3.00816e-10
AT4G27310	377.111	257.27	232.574	814.116	1075.56	809.329	1.58585	0.214968	-7.37713	1.61742e-13	1.2038e-11
AT5G62360	146.787	772.738	380.082	1643.5	1242.12	1624.88	1.58523	0.3978	-3.98499	6.74842e-05	0.00114619
AT1G01470	300.734	790.384	262.438	1736.08	1153.67	1506.74	1.58477	0.30071	-5.27008	1.36364e-07	4.16255e-06
AT4G00970	91.8909	55.7263	74.2065	271.054	200.433	213.472	1.58406	0.205658	-7.70241	1.33526e-14	1.14372e-12
AT1G50740	42.962	36.2221	32.5785	120.256	122.33	104.664	1.58332	0.234355	-6.75607	1.41784e-11	7.67717e-10
AT4G21740	19.0942	21.3617	24.4338	62.037	95.9821	58.0313	1.58149	0.337679	-4.68342	2.82131e-06	6.68705e-05
AT5G65470	155.14	260.056	156.558	398.945	967.349	529.535	1.58124	0.336632	-4.69725	2.63686e-06	6.27541e-05
AT3G51895	75.1834	67.8003	69.6817	175.612	291.71	218.653	1.57787	0.295076	-5.34735	8.92532e-08	2.78e-06
AT1G64380	56.0892	146.746	49.7726	336.908	170.321	339.897	1.57785	0.362694	-4.35035	1.35918e-05	0.000276172
AT5G04980	20.2876	13.9316	23.5289	65.8546	56.4601	64.2489	1.5768	0.292242	-5.39553	6.83209e-08	2.1619e-06
AT4G38580	93.0843	121.669	76.0164	323.547	266.303	303.628	1.57611	0.184875	-8.5253	1.52409e-17	1.7015e-15
AT4G37260	78.7636	135.601	87.7808	341.681	351.935	269.431	1.56929	0.284689	-5.51231	3.54158e-08	1.19083e-06
AT3G01830	2.38678	7.43017	7.23966	16.2251	29.171	22.798	1.56809	0.503467	-3.11458	0.00184209	0.0205883
AT2G28900	809.117	1079.23	380.987	2913.83	2004.33	2132.65	1.56765	0.238999	-6.55926	5.40741e-11	2.72041e-09
AT3G11420	53.7025	65.014	48.8677	167.977	181.613	169.949	1.56578	0.234015	-6.69091	2.2179e-11	1.15377e-09
AT1G24580	4.77355	1.85754	6.3347	20.9971	15.056	20.7254	1.55821	0.501973	-3.10416	0.0019082	0.0212554
AT4G15670	15.514	15.7891	7.23966	65.8546	19.761	48.7048	1.55776	0.42751	-3.64381	0.000268636	0.00386184
AT5G65920	41.7686	22.2905	27.1487	87.8062	105.392	86.0106	1.55762	0.253765	-6.13805	8.35394e-10	3.6891e-08
AT5G54720	46.5421	36.2221	38.9132	125.028	141.15	112.954	1.55718	0.273827	-5.68672	1.29505e-08	4.68767e-07
AT2G46685	3.58016	3.71509	0.904957	20.9971	6.58701	9.32645	1.557	0.52207	-2.98237	0.00286029	0.0296459
AT2G23340	14.3207	69.6578	23.5289	157.478	95.0411	107.772	1.55551	0.358742	-4.336	1.45096e-05	0.000292133
AT1G76360	190.942	168.108	158.367	573.603	518.492	471.504	1.55533	0.184209	-8.44331	3.08469e-17	3.34967e-15
AT5G15845	131.273	111.453	99.5453	359.814	373.578	293.265	1.55478	0.167991	-9.25517	2.13887e-20	3.3733e-18
AT3G20810	10.7405	7.43017	12.6694	41.9943	22.584	39.3784	1.55327	0.313217	-4.95908	7.08274e-07	1.88671e-05
AT3G22930	7.16033	3.71509	9.95453	21.9515	38.5811	16.5804	1.55139	0.464696	-3.3385	0.000842318	0.0104944
AT1G71950	122.919	99.3785	88.6858	312.094	281.359	332.643	1.55076	0.158485	-9.7849	1.30728e-22	2.54689e-20
AT3G56290	126.499	87.3045	105.88	328.319	295.474	337.825	1.54918	0.186638	-8.30045	1.03715e-16	1.07907e-14
AT4G33467	36.995	82.6606	18.0991	217.607	106.333	163.731	1.54631	0.455007	-3.39842	0.000677757	0.00874571
AT3G08405	87.1173	78.0168	56.1073	210.926	195.728	249.742	1.54492	0.177451	-8.70619	3.14249e-18	3.85479e-16
AT3G15440	1.19339	0.928771	1.80991	9.54415	9.41001	7.25391	1.54172	0.569712	-2.70613	0.00680715	0.0587627
AT5G46700	72.7967	80.8031	67.8718	268.191	166.557	233.161	1.54144	0.197056	-7.82234	5.18497e-15	4.64125e-13
AT1G18210	133.659	122.598	58.8222	351.225	283.241	337.825	1.53981	0.276028	-5.57845	2.42675e-08	8.38685e-07
AT5G11650	63.2496	63.1564	46.1528	150.798	212.666	158.55	1.53732	0.236225	-6.50787	7.62262e-11	3.76808e-09
AT1G23710	62.0562	33.4358	26.2438	132.664	107.274	129.534	1.53691	0.274978	-5.58923	2.28083e-08	7.91007e-07
AT1G78410	7.16033	0.928771	8.14461	26.7236	13.174	26.9431	1.53365	0.534151	-2.87119	0.00408931	0.0392573
AT5G51460	87.1173	81.7319	83.2561	272.008	297.356	186.529	1.53313	0.201695	-7.60122	2.93357e-14	2.429e-12
AT4G35110	20.2876	52.0112	30.7685	56.3105	165.616	118.135	1.53289	0.384124	-3.99062	6.58996e-05	0.00112216
AT5G23360	19.0942	33.4358	15.3843	77.3076	65.8701	71.5028	1.53134	0.318992	-4.80056	1.58224e-06	3.98004e-05
AT2G42530	356.823	650.14	286.871	1787.62	1027.57	1182.39	1.53066	0.276382	-5.53822	3.05566e-08	1.03798e-06
AT2G22840	94.2777	94.7347	95.0205	308.276	303.002	226.944	1.52797	0.165882	-9.21122	3.22445e-20	4.96715e-18
AT5G15850	127.693	121.669	100.45	365.541	373.578	293.265	1.52756	0.172842	-8.83788	9.75497e-19	1.28378e-16
AT2G35650	131.273	129.099	104.07	335	415.923	317.099	1.52642	0.15631	-9.76532	1.58614e-22	3.06017e-20
AT4G28703	9.5471	16.7179	21.719	54.4017	49.8731	49.7411	1.52598	0.34057	-4.48065	7.44147e-06	0.000160639
AT2G27420	3.58016	6.5014	14.4793	14.3162	40.4631	41.4509	1.52225	0.494799	-3.07651	0.00209438	0.0229562
AT4G22590	54.8958	53.8687	55.2024	166.068	177.849	146.114	1.52036	0.219578	-6.92401	4.39024e-12	2.63573e-10
AT3G18830	263.739	170.894	157.463	682.407	537.312	531.608	1.51817	0.207851	-7.30413	2.79065e-13	2.01657e-11
AT4G05050	1439.23	1376.44	643.425	3370.04	2983.92	3936.8	1.5177	0.226582	-6.69825	2.10926e-11	1.10887e-09
AT5G41740	53.7025	44.581	63.347	165.114	183.495	134.715	1.51726	0.226718	-6.69226	2.19754e-11	1.14618e-09
AT1G28050	50.1223	81.7319	61.5371	214.743	174.085	184.457	1.51333	0.186162	-8.12908	4.32552e-16	4.43076e-14
AT4G07385	7.16033	0.928771	5.42974	9.54415	32.935	15.5441	1.511	0.553306	-2.73086	0.00631694	0.0552754
AT4G20170	87.1173	78.9456	89.5908	264.373	295.474	192.747	1.51026	0.195361	-7.73062	1.07027e-14	9.28753e-13
AT1G73810	9.5471	9.28771	5.42974	30.5413	22.584	36.2695	1.50251	0.472081	-3.18274	0.00145888	0.016816
AT2G35930	42.962	40.8659	48.8677	113.575	129.858	150.26	1.49944	0.254935	-5.88163	4.06244e-09	1.59859e-07
AT3G47820	54.8958	43.6522	49.7726	145.071	162.793	124.353	1.49743	0.221639	-6.7562	1.4166e-11	7.67717e-10
AT1G63750	53.7025	58.5126	53.3925	146.025	173.144	162.695	1.49428	0.212659	-7.02664	2.11564e-12	1.32624e-10
AT5G41750	69.2165	43.6522	32.5785	178.476	157.147	108.809	1.49348	0.333015	-4.48473	7.30068e-06	0.000158038
AT5G53970	84.7306	61.2989	50.6776	199.473	198.551	168.912	1.49027	0.20359	-7.31997	2.48022e-13	1.79879e-11
AT1G72520	64.443	205.258	76.9214	315.911	360.404	376.167	1.48917	0.31702	-4.6974	2.63497e-06	6.27541e-05
AT4G18880	108.598	73.3729	48.8677	235.741	202.315	223.835	1.48676	0.214447	-6.93301	4.1199e-12	2.48093e-10
AT3G17130	11.9339	10.2165	10.8595	35.3134	34.817	35.2333	1.48655	0.358449	-4.14716	3.36623e-05	0.000621689
AT1G15100	42.962	38.0796	19.9091	142.208	84.6901	76.6842	1.48639	0.295778	-5.02537	5.02472e-07	1.38107e-05
AT1G12710	85.9239	69.6578	69.6817	232.877	239.955	173.058	1.48525	0.187702	-7.91282	2.51633e-15	2.39256e-13
AT1G51610	264.932	217.332	213.57	844.657	502.495	636.271	1.48307	0.154592	-9.59343	8.52012e-22	1.47228e-19
AT1G73630	35.8016	36.2221	19.9091	104.986	79.0441	82.9018	1.481	0.237421	-6.23787	4.43563e-10	2.00329e-08
AT3G14200	93.0843	139.316	101.355	282.507	293.592	388.602	1.47628	0.212632	-6.94286	3.84236e-12	2.32083e-10
AT3G62695	10.7405	9.28771	5.42974	32.4501	21.643	27.9794	1.47312	0.428022	-3.44168	0.000578117	0.00762838
AT4G22880	20.2876	17.6467	14.4793	38.1766	67.7521	64.2489	1.46756	0.401337	-3.65668	0.000255501	0.00370755
AT3G23000	352.049	348.289	169.227	962.05	672.816	861.142	1.46423	0.229195	-6.38855	1.67461e-10	7.92329e-09
AT1G29680	3.58016	4.64386	1.80991	12.4074	13.174	14.5078	1.4633	0.522066	-2.8029	0.0050646	0.0463796
AT2G34650	19.0942	25.0768	46.1528	97.3503	111.979	66.3214	1.46062	0.319065	-4.5778	4.69885e-06	0.000105271
AT5G01005	14.3207	11.1453	7.23966	40.0854	22.584	36.2695	1.45881	0.368985	-3.95356	7.69954e-05	0.00129861
AT1G70780	442.747	360.363	371.032	990.683	1259.06	1013.47	1.45404	0.136544	-10.6489	1.76406e-26	4.38192e-24
AT3G49780	29.8347	34.3645	37.1032	113.575	105.392	76.6842	1.45106	0.267411	-5.42631	5.75305e-08	1.87111e-06
AT5G06980	288.8	317.64	265.152	797.891	817.73	805.184	1.44919	0.141601	-10.2343	1.39128e-24	3.00516e-22
AT5G44110	9.5471	18.5754	19.0041	45.8119	51.7551	45.596	1.44786	0.303287	-4.77388	1.80713e-06	4.44997e-05
AT3G59080	64.443	45.5098	52.4875	137.436	182.554	137.824	1.44737	0.229973	-6.29364	3.10107e-10	1.4232e-08
AT1G37130	3456.05	2915.41	1588.2	8333	6611.48	7503.65	1.44734	0.211572	-6.84088	7.87094e-12	4.5601e-10
AT4G04075	8.35372	8.35894	11.7644	26.7236	31.994	31.0882	1.44487	0.401624	-3.59758	0.000321196	0.004514
AT2G08965	13.1273	4.64386	9.04957	22.906	26.348	33.1607	1.44356	0.440454	-3.27742	0.00104759	0.0127014
AT5G60680	361.597	257.27	195.471	660.455	813.025	800.002	1.44352	0.202192	-7.13934	9.37784e-13	6.27463e-11
AT4G18270	85.9239	75.2305	85.9709	240.513	208.902	246.633	1.44322	0.213259	-6.76745	1.31074e-11	7.13616e-10
AT1G73480	272.092	595.342	281.442	1108.08	953.234	1204.15	1.44305	0.243696	-5.9215	3.1901e-09	1.28327e-07
AT5G23730	20.2876	13.9316	14.4793	45.8119	54.5781	40.4146	1.44249	0.306863	-4.70076	2.59189e-06	6.20554e-05
AT2G18210	1.19339	5.57263	4.52479	16.2251	6.58701	21.7617	1.44209	0.513367	-2.80908	0.00496833	0.0456877
AT5G10410	10.7405	81.7319	14.4793	152.706	95.9821	105.7	1.44057	0.448441	-3.21239	0.00131637	0.0154034
AT3G55760	22.6744	68.7291	52.4875	115.484	180.672	138.861	1.43852	0.348694	-4.12545	3.70015e-05	0.0006752
AT1G57990	210.036	195.042	238.909	458.119	861.016	528.499	1.43733	0.273767	-5.25019	1.51939e-07	4.60265e-06
AT3G54500	652.783	690.077	573.743	1834.39	1617.58	1774.1	1.43661	0.0842123	-17.0594	2.97695e-65	3.28655e-62
AT2G39650	11.9339	13.9316	15.3843	35.3134	39.5221	46.6323	1.4347	0.320904	-4.47083	7.79182e-06	0.000166315
AT1G09623	46.5421	42.7235	20.814	106.894	109.156	100.518	1.43255	0.30319	-4.72493	2.30195e-06	5.53136e-05
AT4G21570	163.494	625.992	191.851	863.746	808.32	1214.51	1.43105	0.334903	-4.27302	1.92844e-05	0.000376075
AT5G66800	27.4479	18.5754	24.4338	73.49	59.2831	69.4303	1.43102	0.287099	-4.98439	6.21576e-07	1.67371e-05
AT1G64780	69.2165	32.507	31.6735	86.8518	164.675	132.643	1.42695	0.311305	-4.58378	4.56655e-06	0.000102887
AT5G64660	46.5421	32.507	19.0041	91.6238	114.802	76.6842	1.42651	0.329874	-4.3244	1.52945e-05	0.000304541
AT3G15750	34.6083	17.6467	37.1032	95.4415	76.2211	80.8293	1.42483	0.271653	-5.24503	1.56254e-07	4.72614e-06
AT1G56510	161.107	167.179	154.748	336.908	574.011	422.799	1.42479	0.193985	-7.34484	2.06004e-13	1.51619e-11
AT2G45660	165.881	214.546	153.843	481.98	584.362	413.473	1.42364	0.201794	-7.05491	1.72707e-12	1.0965e-10
AT3G57760	14.3207	24.1481	16.2892	47.7208	56.4601	53.8862	1.42363	0.303981	-4.68327	2.82329e-06	6.68705e-05
AT1G02400	23.8678	126.313	10.8595	197.564	94.1001	233.161	1.42273	0.475343	-2.99305	0.00276205	0.0288274
AT4G37320	26.2545	27.8631	42.533	117.393	76.2211	84.9743	1.42084	0.272499	-5.21414	1.84676e-07	5.52692e-06
AT4G02200	81.1504	51.0824	56.1073	147.934	199.492	167.876	1.42013	0.206223	-6.88637	5.72334e-12	3.36492e-10
AT5G09855	73.9901	101.236	16.2892	142.208	242.778	205.182	1.41878	0.413467	-3.43143	0.0006004	0.00788575
AT2G40460	134.853	144.888	189.136	392.265	593.772	330.571	1.41808	0.242751	-5.84168	5.16757e-09	1.97102e-07
AT3G09520	31.0281	19.5042	14.4793	83.0341	49.8731	53.8862	1.41733	0.327678	-4.32537	1.52277e-05	0.000303516
AT4G36500	250.611	346.432	195.471	899.059	540.135	736.79	1.41323	0.198112	-7.13345	9.78816e-13	6.50536e-11
AT3G09450	20.2876	18.5754	13.5744	33.4045	56.4601	62.1763	1.41293	0.320342	-4.4107	1.03038e-05	0.000213512
AT3G01550	133.659	181.11	125.789	352.179	377.342	476.685	1.41291	0.187937	-7.51801	5.56149e-14	4.40311e-12
AT3G28880	17.9008	0.928771	13.5744	56.3105	28.23	27.9794	1.41274	0.502251	-2.81282	0.00491088	0.045327
AT1G62710	19.0942	52.0112	22.6239	80.1709	90.3361	104.664	1.41272	0.326357	-4.32877	1.49946e-05	0.000300072
AT1G18390	34.6083	38.0796	48.8677	125.028	119.507	98.4459	1.41215	0.259719	-5.43722	5.41194e-08	1.76885e-06
AT2G37540	73.9901	60.3701	54.2974	173.704	203.256	136.788	1.41137	0.194552	-7.25445	4.03294e-13	2.86223e-11
AT1G05733	40.5752	27.8631	65.1569	140.299	128.917	106.736	1.41068	0.255738	-5.51611	3.4658e-08	1.16733e-06
AT1G65486	7.16033	7.43017	12.6694	41.0398	26.348	19.6892	1.40687	0.463428	-3.03579	0.00239909	0.0256592
AT5G54930	13.1273	37.1509	30.7685	100.214	52.6961	83.9381	1.40593	0.311508	-4.51329	6.38283e-06	0.000139691
AT1G07150	9.5471	10.2165	10.8595	22.906	34.817	33.1607	1.40106	0.396034	-3.53773	0.000403581	0.00552339
AT3G08170	243.451	290.705	171.037	712.948	641.763	550.261	1.39994	0.17821	-7.85557	3.97962e-15	3.62766e-13
AT1G19380	31.0281	56.655	37.1032	123.12	103.51	134.715	1.39842	0.35144	-3.97912	6.91696e-05	0.00117382
AT1G20440	1102.69	3790.32	1385.49	7802.34	5417.34	5185.51	1.39791	0.356762	-3.91833	8.91648e-05	0.00147534
AT4G27940	27.4479	45.5098	35.2933	82.0797	98.8051	122.28	1.39774	0.253264	-5.5189	3.41129e-08	1.15288e-06
AT2G21500	60.8628	57.5838	62.442	158.433	136.445	204.146	1.39544	0.254813	-5.47636	4.34169e-08	1.44037e-06
AT5G59732	304.314	304.637	156.558	765.441	595.654	701.556	1.39472	0.193052	-7.22457	5.02688e-13	3.5174e-11
AT2G22190	100.245	104.951	85.9709	314.957	229.604	243.524	1.39452	0.193989	-7.18867	6.54269e-13	4.45954e-11
AT1G22250	47.7355	29.7207	71.4916	151.752	143.032	117.099	1.39419	0.245679	-5.67486	1.38804e-08	5.01511e-07
AT2G18230	41.7686	43.6522	38.9132	99.2592	130.799	108.809	1.39315	0.208024	-6.69707	2.12639e-11	1.11492e-09
AT5G40390	341.309	543.331	198.186	1099.49	853.488	1003.11	1.39139	0.23547	-5.90898	3.44235e-09	1.37638e-07
AT5G42570	52.5091	118.883	56.1073	212.835	200.433	209.327	1.39001	0.215217	-6.45866	1.05632e-10	5.09497e-09
AT2G41250	126.499	90.0908	62.442	264.373	200.433	303.628	1.38982	0.270027	-5.14695	2.64752e-07	7.69174e-06
AT4G37370	17.9008	8.35894	9.04957	21.9515	77.1621	16.5804	1.38858	0.50419	-2.75408	0.00588568	0.0523312
AT1G69760	90.6975	110.524	140.268	260.555	394.28	289.12	1.38827	0.253857	-5.4687	4.53347e-08	1.50002e-06
AT4G21215	115.759	161.606	219	597.464	359.463	397.929	1.38492	0.213075	-6.49968	8.04894e-11	3.95912e-09
AT5G09405	2.38678	0.928771	5.42974	10.4986	11.292	10.3627	1.38469	0.491165	-2.81919	0.00481443	0.0446441
AT5G64850	201.683	165.321	213.57	428.532	669.993	492.229	1.3826	0.254892	-5.42425	5.81978e-08	1.88664e-06
AT3G16720	59.6694	35.2933	33.4834	117.393	114.802	112.954	1.37937	0.253473	-5.44188	5.27225e-08	1.73174e-06
AT5G26340	208.843	172.751	112.215	551.652	445.094	337.825	1.37933	0.234529	-5.88127	4.0712e-09	1.59887e-07
AT1G75810	31.0281	19.5042	18.0991	75.3988	59.2831	51.8136	1.37813	0.28028	-4.91697	8.78935e-07	2.31034e-05
AT2G23910	7.16033	9.28771	9.95453	39.131	14.115	29.0156	1.37805	0.381426	-3.61289	0.000302804	0.0042767
AT3G16510	16.7074	12.074	20.814	42.9487	55.5191	41.4509	1.37769	0.340005	-4.05198	5.07867e-05	0.000893918
AT4G20860	73.9901	136.529	52.4875	320.683	196.669	204.146	1.37571	0.273368	-5.03243	4.84311e-07	1.34042e-05
AT4G04450	13.1273	5.57263	16.2892	40.0854	26.348	37.3058	1.37488	0.407961	-3.37012	0.000751351	0.00954658
AT5G62210	4.77355	2.78631	7.23966	10.4986	23.525	14.5078	1.37233	0.436911	-3.14098	0.00168383	0.0190879
AT5G58120	35.8016	40.8659	33.4834	82.0797	137.386	79.793	1.3717	0.261781	-5.23986	1.607e-07	4.85325e-06
AT4G17230	91.8909	140.244	90.4957	295.869	256.893	306.737	1.37114	0.193688	-7.0791	1.45098e-12	9.33133e-11
AT5G59730	307.894	326.927	166.512	799.8	606.005	718.137	1.37024	0.194058	-7.06101	1.65292e-12	1.05617e-10
AT4G12005	7.16033	11.1453	4.52479	25.7692	16.938	30.0519	1.36795	0.472939	-2.89245	0.00382247	0.0372171
AT5G08640	38.1884	36.2221	29.8636	86.8518	79.9851	115.026	1.36781	0.23029	-5.93952	2.8585e-09	1.15466e-07
AT5G17220	14.3207	13.0028	12.6694	27.678	58.3421	30.0519	1.36756	0.352705	-3.87734	0.000105605	0.00171313
AT5G52760	10.7405	7.43017	6.3347	22.906	22.584	29.0156	1.36746	0.450662	-3.03434	0.00241062	0.0257686
AT3G50950	301.927	351.076	199.996	850.384	737.745	662.178	1.36656	0.17938	-7.61823	2.57173e-14	2.1383e-12
AT2G35935	34.6083	31.5782	41.628	73.49	107.274	110.881	1.36455	0.27354	-4.9885	6.08491e-07	1.64293e-05
AT4G20835	260.159	354.791	162.892	707.222	606.946	746.116	1.36267	0.210745	-6.46593	1.00675e-10	4.90344e-09
AT4G11600	354.436	361.292	278.727	943.916	720.807	933.682	1.36078	0.151406	-8.98762	2.52651e-19	3.56077e-17
AT2G12400	109.792	112.381	127.599	265.327	362.286	295.338	1.35862	0.189828	-7.15712	8.23891e-13	5.54995e-11
AT3G48100	106.212	78.0168	65.1569	305.413	179.731	175.13	1.35712	0.234198	-5.79476	6.84185e-09	2.56531e-07
AT5G03555	99.0512	83.5894	87.7808	251.966	202.315	252.85	1.35677	0.17035	-7.9646	1.65765e-15	1.61475e-13
AT3G51400	34.6083	18.5754	36.1983	104.986	76.2211	69.4303	1.35598	0.339406	-3.99517	6.46473e-05	0.00110557
AT2G23100	25.0611	16.7179	28.0537	53.4472	101.628	41.4509	1.35048	0.36444	-3.70563	0.000210864	0.00315278
AT5G62570	97.8578	118.883	81.4461	234.786	254.07	290.156	1.34871	0.193039	-6.98672	2.81381e-12	1.73115e-10
AT1G51700	63.2496	100.307	66.9668	204.245	176.908	226.944	1.34683	0.209702	-6.42261	1.33959e-10	6.39912e-09
AT1G67360	93.0843	64.0852	48.8677	149.843	211.725	191.71	1.34639	0.279038	-4.8251	1.39932e-06	3.5696e-05
AT2G23320	84.7306	54.7975	59.7272	183.248	138.327	208.291	1.34628	0.266618	-5.04947	4.43046e-07	1.23829e-05
AT3G25600	42.962	38.0796	34.3884	81.1253	145.855	88.0832	1.34434	0.320748	-4.19127	2.77392e-05	0.000522001
AT3G06410	88.3107	93.8059	80.5412	251.011	212.666	220.726	1.34431	0.180072	-7.4654	8.30483e-14	6.37195e-12
AT4G20830	281.64	381.725	180.086	745.398	662.465	791.712	1.34406	0.202823	-6.62677	3.43111e-11	1.75729e-09
AT5G67300	212.423	380.796	152.938	569.786	814.907	633.162	1.34128	0.303744	-4.41583	1.00622e-05	0.000209159
AT4G15430	42.962	52.94	47.0578	149.843	109.156	118.135	1.33913	0.218021	-6.14222	8.13737e-10	3.60147e-08
AT1G01140	310.281	372.437	246.148	763.532	757.506	871.505	1.33848	0.164298	-8.14666	3.74129e-16	3.85217e-14
AT5G07070	22.6744	35.2933	28.0537	81.1253	72.4571	81.8655	1.33804	0.312978	-4.27517	1.90989e-05	0.000373556
AT5G42800	19.0942	24.1481	9.04957	47.7208	60.2241	55.9587	1.3343	0.4589	-2.9076	0.00364219	0.0359016
AT5G46520	33.4149	23.2193	41.628	101.168	69.6341	90.1557	1.33342	0.260757	-5.11367	3.15965e-07	9.00841e-06
AT5G63320	189.749	221.048	200.9	588.874	505.318	476.685	1.33141	0.150957	-8.81979	1.14673e-18	1.4894e-16
AT1G56300	206.456	202.472	196.376	660.455	428.156	462.178	1.33104	0.14988	-8.88074	6.6417e-19	8.97849e-17
AT1G24530	53.7025	56.655	57.9173	141.253	195.728	111.917	1.329	0.279757	-4.75055	2.02861e-06	4.91726e-05
AT3G60200	56.0892	44.581	55.2024	130.755	145.855	126.425	1.32789	0.214437	-6.19245	5.92363e-10	2.65122e-08
AT5G39660	83.5372	33.4358	40.7231	136.481	132.681	132.643	1.32639	0.226244	-5.86266	4.55522e-09	1.7577e-07
AT4G37760	276.866	387.298	251.578	766.395	777.267	796.894	1.32221	0.170862	-7.73845	1.00636e-14	8.77121e-13
AT2G37710	483.322	344.574	319.45	1023.13	1001.23	900.521	1.31582	0.185462	-7.09482	1.29522e-12	8.38391e-11
AT5G62920	91.8909	102.165	64.252	297.777	196.669	173.058	1.31581	0.234552	-5.6099	2.02449e-08	7.04566e-07
AT1G76600	16.7074	31.5782	18.0991	48.6752	76.2211	55.9587	1.31528	0.350954	-3.74773	0.000178443	0.00271935
AT1G80120	10.7405	26.9344	9.95453	55.3561	33.876	46.6323	1.31508	0.398801	-3.29757	0.00097524	0.0119482
AT2G46620	50.1223	44.581	26.2438	142.208	98.8051	75.6479	1.31252	0.283992	-4.62168	3.80639e-06	8.78521e-05
AT5G08790	115.759	94.7347	43.4379	221.424	186.318	245.597	1.30416	0.261412	-4.9889	6.07249e-07	1.6418e-05
AT5G48540	25.0611	47.3673	33.4834	79.2164	93.1591	103.627	1.3022	0.255217	-5.10231	3.35533e-07	9.52531e-06
AT3G44635	69.2165	65.9428	54.2974	150.798	188.2	137.824	1.30167	0.192167	-6.77364	1.25584e-11	6.89395e-10
AT3G24550	211.23	208.045	225.334	432.35	692.577	515.027	1.29974	0.214046	-6.07224	1.26141e-09	5.37913e-08
AT3G14870	20.2876	21.3617	19.9091	30.5413	79.9851	53.8862	1.29811	0.33485	-3.87668	0.000105889	0.00171634
AT1G19140	16.7074	35.2933	21.719	70.6267	52.6961	72.5391	1.29792	0.269769	-4.81121	1.50022e-06	3.79293e-05
AT3G01210	34.6083	62.2277	38.9132	105.94	85.6311	162.695	1.29322	0.282467	-4.57832	4.68725e-06	0.00010513
AT4G35090	2760.31	2182.61	2082.31	5036.45	6644.41	5730.59	1.28945	0.138923	-9.28173	1.66743e-20	2.67219e-18
AT5G24120	196.909	195.042	152.033	414.216	523.197	450.779	1.28918	0.251771	-5.12046	3.04784e-07	8.73978e-06
AT1G30620	44.1554	44.581	37.1032	114.53	95.0411	106.736	1.28769	0.200916	-6.40909	1.46388e-10	6.95936e-09
AT1G16850	7.16033	85.447	24.4338	114.53	112.92	132.643	1.28725	0.473056	-2.72113	0.00650595	0.0566052
AT1G27910	101.438	206.187	114.025	352.179	348.17	366.84	1.28692	0.219465	-5.86389	4.52141e-09	1.75145e-07
AT3G55610	405.752	553.548	304.066	1160.57	880.777	1140.94	1.28648	0.214519	-5.99706	2.00919e-09	8.37036e-08
AT4G17550	47.7355	111.453	62.442	161.296	194.787	210.363	1.2848	0.235156	-5.46361	4.66555e-08	1.5401e-06
AT4G14370	10.7405	11.1453	19.0041	35.3134	47.0501	33.1607	1.28387	0.442054	-2.90432	0.00368049	0.0361382
AT1G31540	184.975	136.529	133.029	370.313	452.622	311.918	1.28332	0.202883	-6.32541	2.52566e-10	1.17266e-08
AT1G49840	66.8297	61.2989	57.9173	112.621	195.728	165.804	1.2832	0.269849	-4.75525	1.98205e-06	4.82097e-05
AT5G08150	8.35372	9.28771	12.6694	21.9515	43.2861	21.7617	1.2801	0.445532	-2.87319	0.0040635	0.039062
AT3G16560	152.754	132.814	98.6403	368.404	259.716	331.607	1.28002	0.20885	-6.12888	8.85011e-10	3.89092e-08
AT1G66090	27.4479	22.2905	38.0082	56.3105	78.1031	92.2283	1.27985	0.311134	-4.1135	3.89699e-05	0.000707871
AT2G43120	36.995	43.6522	31.6735	66.8091	100.687	121.244	1.27393	0.297533	-4.28163	1.85529e-05	0.000364311
AT5G39785	23.8678	45.5098	33.4834	83.0341	82.8081	97.4096	1.27278	0.261692	-4.86365	1.15239e-06	2.98182e-05
AT5G02270	10.7405	26.0056	27.1487	47.7208	75.2801	55.9587	1.26838	0.398678	-3.18146	0.00146536	0.0168712
AT1G18300	19.0942	16.7179	29.8636	31.4957	69.6341	75.6479	1.26713	0.384582	-3.29482	0.000984862	0.0120438
AT3G04140	145.593	106.809	100.45	317.82	312.412	234.198	1.26694	0.179708	-7.05	1.78918e-12	1.13231e-10
AT4G17670	35.8016	20.433	27.1487	70.6267	102.569	48.7048	1.26673	0.371461	-3.41013	0.000649314	0.00842794
AT5G66740	15.514	11.1453	21.719	24.8148	42.3451	65.2852	1.26639	0.408085	-3.10325	0.00191405	0.0212967
AT4G23190	31.0281	22.2905	32.5785	92.5783	65.8701	66.3214	1.26239	0.343033	-3.68009	0.000233151	0.00343454
AT4G35730	41.7686	58.5126	39.8181	108.803	131.74	110.881	1.26175	0.242929	-5.19392	2.05916e-07	6.11654e-06
AT5G37600	504.803	257.27	244.338	1021.22	864.78	690.157	1.26157	0.301854	-4.1794	2.9228e-05	0.000547426
AT2G31010	121.726	201.543	120.359	318.775	453.563	335.752	1.26124	0.244975	-5.14847	2.6262e-07	7.66341e-06
AT2G30500	84.7306	143.96	135.744	217.607	305.825	383.421	1.26057	0.226588	-5.56325	2.64792e-08	9.06351e-07
AT5G38240	11.9339	13.9316	12.6694	37.2222	33.876	27.9794	1.26	0.323963	-3.88933	0.000100521	0.00163868
AT1G14720	257.772	175.538	258.818	644.23	584.362	461.141	1.25948	0.158391	-7.95169	1.83987e-15	1.7835e-13
AT2G32280	25.0611	13.0028	19.9091	51.5384	53.6371	41.4509	1.25741	0.303506	-4.14293	3.42895e-05	0.000630927
AT3G05320	34.6083	26.9344	35.2933	43.9031	107.274	98.4459	1.25462	0.343842	-3.64884	0.000263429	0.00380717
AT5G66675	72.7967	51.0824	63.347	119.302	182.554	155.441	1.25181	0.218856	-5.71981	1.0664e-08	3.88124e-07
AT5G44568	52.5091	50.1536	32.5785	166.068	81.8671	99.4822	1.25151	0.328999	-3.80401	0.000142373	0.00222775
AT3G07360	162.301	214.546	183.706	371.267	581.539	413.473	1.25	0.180022	-6.94356	3.82328e-12	2.31635e-10
AT5G58770	27.4479	19.5042	26.2438	40.0854	90.3361	59.0675	1.24955	0.351949	-3.55037	0.000384683	0.00530494
AT5G16360	10.7405	14.8603	6.3347	20.0427	31.994	33.1607	1.24725	0.412083	-3.02669	0.00247247	0.0263872
AT2G44490	798.377	598.129	623.515	1752.31	1624.17	1481.87	1.24564	0.138122	-9.01842	1.90829e-19	2.74794e-17
AT3G19970	48.9289	51.0824	33.4834	73.49	159.029	102.591	1.2436	0.306675	-4.05511	5.01108e-05	0.000884253
AT3G09390	750.641	439.309	304.971	1380.08	1295.76	977.205	1.24299	0.21944	-5.66438	1.47559e-08	5.30252e-07
AT2G19620	68.0231	62.2277	43.4379	118.347	190.082	119.171	1.24245	0.263804	-4.70976	2.48014e-06	5.94515e-05
AT5G66650	14.3207	9.28771	21.719	28.6325	49.8731	42.4872	1.24026	0.406643	-3.04999	0.00228847	0.024729
AT5G43630	229.131	302.779	216.285	663.318	526.02	619.691	1.23772	0.184	-6.72677	1.73473e-11	9.21724e-10
AT5G06385	4.77355	5.57263	10.8595	14.3162	20.702	24.8705	1.23397	0.409168	-3.0158	0.00256306	0.0271789
AT3G62720	100.245	103.094	102.26	183.248	378.283	192.747	1.23237	0.270507	-4.55576	5.21958e-06	0.000116022
AT1G25550	256.578	245.196	258.818	506.794	654.937	654.924	1.22971	0.161983	-7.5916	3.15977e-14	2.59467e-12
AT3G02255	35.8016	29.7207	44.3429	117.393	72.4571	79.793	1.22925	0.23868	-5.15019	2.60229e-07	7.6048e-06
AT4G24380	40.5752	36.2221	17.1942	56.3105	79.9851	103.627	1.22819	0.368821	-3.33004	0.000868346	0.0107849
AT1G08500	20.2876	20.433	29.8636	57.2649	62.1061	58.0313	1.2278	0.288489	-4.25598	2.0814e-05	0.000403133
AT5G46230	7.16033	12.074	9.95453	35.3134	29.171	15.5441	1.22553	0.425217	-2.88213	0.00395	0.0381968
AT4G08785	11.9339	17.6467	9.04957	44.8575	28.23	29.0156	1.22428	0.420208	-2.91352	0.00357377	0.0354205
AT3G05660	13.1273	65.9428	33.4834	125.983	99.7461	66.3214	1.22406	0.349832	-3.49898	0.000467034	0.00630068
AT2G31880	325.795	229.407	197.281	637.549	619.179	548.188	1.22345	0.20983	-5.83066	5.52079e-09	2.0897e-07
AT3G28200	174.235	118.883	129.409	287.279	443.212	287.047	1.22321	0.226504	-5.40039	6.64975e-08	2.11769e-06
AT3G47960	214.81	459.742	218.095	577.421	1015.34	588.603	1.22063	0.270598	-4.51085	6.45693e-06	0.000141157
AT4G31870	17.9008	15.7891	11.7644	47.7208	43.2861	24.8705	1.22062	0.354182	-3.44631	0.000568305	0.00751888
AT2G24540	23.8678	26.9344	13.5744	47.7208	58.3421	50.7774	1.22014	0.270648	-4.50822	6.53751e-06	0.000142605
AT1G07620	15.514	13.9316	13.5744	38.1766	40.4631	35.2333	1.21965	0.413193	-2.95176	0.00315968	0.0320289
AT3G50760	27.4479	27.8631	21.719	67.7635	68.6931	52.8499	1.21925	0.294449	-4.14078	3.46123e-05	0.000635689
AT1G12580	161.107	174.609	158.367	350.27	470.501	351.296	1.21822	0.164456	-7.40758	1.28629e-13	9.64575e-12
AT2G38790	35.8016	25.0768	27.1487	100.214	46.1091	70.4665	1.2181	0.308416	-3.94953	7.83063e-05	0.00131539
AT1G10090	319.828	481.104	323.975	946.78	746.214	969.951	1.21535	0.162591	-7.47487	7.72799e-14	5.99885e-12
AT5G50915	10.7405	38.0796	37.1032	61.0826	87.5131	78.7567	1.21472	0.391405	-3.10349	0.00191256	0.0212921
AT1G33110	165.881	124.455	87.7808	259.601	345.347	289.12	1.21283	0.204178	-5.94006	2.84917e-09	1.15466e-07
AT5G05190	64.443	85.447	46.1528	170.84	117.625	179.275	1.21206	0.214927	-5.63937	1.70674e-08	6.05648e-07
AT3G16030	11.9339	8.35894	14.4793	30.5413	33.876	25.9068	1.21164	0.386272	-3.13675	0.00170832	0.0193183
AT5G57050	56.0892	67.8003	47.0578	118.347	168.439	122.28	1.21113	0.222855	-5.43462	5.49128e-08	1.79184e-06
AT1G22770	588.34	654.784	640.71	1588.15	1463.26	1357.52	1.21108	0.0959476	-12.6224	1.58993e-36	6.58231e-34
AT5G08870	7.16033	10.2165	4.52479	13.3618	25.407	21.7617	1.21014	0.438162	-2.76185	0.00574757	0.0513791
AT3G12970	5.96694	10.2165	20.814	41.9943	23.525	34.197	1.21005	0.401511	-3.01374	0.0025805	0.0273201
AT3G58795	28.6413	44.581	24.4338	78.262	98.8051	62.1763	1.20988	0.284869	-4.24715	2.16506e-05	0.000416944
AT2G01890	36.995	104.022	84.161	239.558	139.268	188.602	1.20779	0.340498	-3.54712	0.00038946	0.00534855
AT4G25350	14.3207	20.433	16.2892	49.6296	34.817	41.4509	1.20778	0.296688	-4.07089	4.6834e-05	0.000833201
AT1G20823	70.4099	40.8659	38.9132	108.803	121.389	129.534	1.20777	0.277657	-4.34985	1.3623e-05	0.000276523
AT2G22080	63.2496	117.954	86.8759	259.601	191.964	189.638	1.20724	0.192211	-6.28078	3.36877e-10	1.54249e-08
AT3G10720	243.451	274.916	259.723	645.185	656.819	532.644	1.20176	0.183878	-6.53566	6.3329e-11	3.15407e-09
AT1G05000	13.1273	2.78631	14.4793	23.8604	39.5221	18.6529	1.20171	0.43032	-2.79259	0.0052288	0.04762
AT1G07870	26.2545	26.9344	27.1487	53.4472	70.5751	69.4303	1.20065	0.252742	-4.75051	2.02906e-06	4.91726e-05
AT4G38960	40.5752	44.581	23.5289	97.3503	63.0471	97.4096	1.19232	0.247437	-4.81868	1.44509e-06	3.67124e-05
AT2G44670	184.975	138.387	133.029	439.985	330.291	288.084	1.19151	0.16062	-7.41816	1.18762e-13	8.93956e-12
AT3G14440	97.8578	89.162	79.6362	199.473	172.203	263.213	1.18936	0.261697	-4.54482	5.49834e-06	0.000121674
AT2G39130	90.6975	100.307	107.69	191.837	256.893	262.177	1.18266	0.263322	-4.49129	7.07926e-06	0.000153412
AT1G33230	126.499	157.891	155.653	357.906	296.415	366.84	1.18152	0.155455	-7.6004	2.95221e-14	2.43429e-12
AT2G17730	31.0281	34.3645	38.0082	104.986	63.9881	81.8655	1.18055	0.295405	-3.99638	6.43181e-05	0.00110089
AT1G14687	5.96694	5.57263	9.95453	23.8604	14.115	19.6892	1.17981	0.41146	-2.86737	0.00413904	0.0395585
AT3G45640	321.021	227.549	257.008	590.783	686.931	579.276	1.17972	0.169649	-6.95388	3.55385e-12	2.16632e-10
AT3G44260	54.8958	34.3645	46.1528	53.4472	173.144	121.244	1.17945	0.423418	-2.78556	0.0053436	0.0484223
AT3G19010	274.479	227.549	130.314	711.039	337.819	449.742	1.17826	0.269182	-4.37717	1.20228e-05	0.000247326
AT5G18540	28.6413	37.1509	20.814	83.9885	63.9881	55.9587	1.17704	0.255436	-4.60796	4.06633e-06	9.28806e-05
AT4G01950	226.744	207.116	218.095	275.826	900.538	389.638	1.17665	0.304996	-3.85793	0.000114349	0.00184294
AT3G07835	50.1223	110.524	33.4834	135.527	224.899	115.026	1.17588	0.348392	-3.37517	0.000737712	0.0094336
AT2G09735	60.8628	61.2989	41.628	166.068	114.802	122.28	1.17473	0.351638	-3.34074	0.000835546	0.0104238
AT3G44450	211.23	149.532	99.5453	363.632	359.463	345.079	1.17387	0.228996	-5.12616	2.95704e-07	8.52863e-06
AT2G41330	14.3207	22.2905	28.0537	46.7663	75.2801	41.4509	1.17097	0.378336	-3.09506	0.00196774	0.0218184
AT5G45750	168.268	191.327	143.888	395.128	344.406	416.582	1.17046	0.17896	-6.54034	6.13804e-11	3.07242e-09
AT5G57630	206.456	260.056	256.103	728.219	428.156	515.027	1.17045	0.18194	-6.43318	1.2496e-10	5.98363e-09
AT4G27560	107.405	340.859	109.5	460.982	388.634	479.794	1.16915	0.299051	-3.90954	9.24714e-05	0.00152245
AT3G24460	13.1273	24.1481	24.4338	28.6325	56.4601	70.4665	1.16795	0.373218	-3.12942	0.00175154	0.0197316
AT1G55450	326.988	231.264	240.719	772.122	419.687	656.997	1.16697	0.216649	-5.38645	7.18637e-08	2.26679e-06
AT1G07420	150.367	122.598	146.603	310.185	354.758	284.975	1.16293	0.138249	-8.41182	4.03692e-17	4.31299e-15
ATMG00380	14.3207	10.2165	18.0991	22.906	31.994	49.7411	1.16282	0.346081	-3.35995	0.000779563	0.00983586
AT1G74890	39.3818	39.0084	43.4379	163.205	54.5781	74.6116	1.16229	0.320418	-3.62741	0.000286279	0.00408102
AT2G02800	150.367	130.957	120.359	310.185	304.884	291.193	1.16108	0.134156	-8.65467	4.94333e-18	5.81265e-16
AT4G15130	76.3768	132.814	59.7272	284.416	139.268	209.327	1.16069	0.272424	-4.26059	2.03884e-05	0.000397215
AT5G62090	152.754	186.683	178.277	340.726	534.489	312.954	1.15584	0.207623	-5.56701	2.59147e-08	8.89424e-07
AT2G22240	194.522	157.891	149.318	344.544	504.377	321.244	1.1555	0.271414	-4.25735	2.06868e-05	0.000401597
AT5G62470	89.5041	197.828	98.6403	305.413	249.365	337.825	1.15533	0.241956	-4.77497	1.79733e-06	4.43684e-05
AT4G27030	75.1834	91.0196	79.6362	167.023	239.014	161.659	1.15487	0.230477	-5.01077	5.42126e-07	1.47983e-05
AT5G14570	108.598	112.381	89.5908	234.786	241.837	224.871	1.15392	0.156936	-7.35278	1.94122e-13	1.43405e-11
AT2G15020	99.0512	107.737	132.124	273.917	218.312	284.975	1.15182	0.204422	-5.63454	1.75527e-08	6.20653e-07
AT2G34850	7.16033	9.28771	13.5744	19.0883	31.994	25.9068	1.14915	0.406574	-2.82642	0.0047071	0.0438124
AT2G34510	299.54	333.429	407.231	634.686	1200.72	614.51	1.1484	0.299415	-3.83547	0.000125326	0.00199079
AT3G25870	22.6744	32.507	21.719	100.214	36.6991	50.7774	1.14816	0.353758	-3.24561	0.001172	0.0139461
AT1G19490	19.0942	16.7179	20.814	38.1766	51.7551	43.5234	1.14762	0.297538	-3.85707	0.000114755	0.00184731
AT5G01340	9.5471	14.8603	12.6694	21.9515	36.6991	32.1244	1.14746	0.324971	-3.53096	0.000414054	0.00564728
AT1G56540	26.2545	15.7891	37.1032	57.2649	73.3981	58.0313	1.14706	0.338753	-3.38613	0.000708852	0.00911145
AT1G54217	19.0942	15.7891	18.0991	50.584	28.23	46.6323	1.14651	0.31447	-3.64585	0.000266513	0.00384057
AT1G12990	150.367	163.464	132.124	328.319	395.221	286.011	1.14646	0.189464	-6.05109	1.43872e-09	6.09598e-08
AT1G48745	35.8016	13.9316	27.1487	68.7179	57.4011	49.7411	1.14606	0.269214	-4.25705	2.07144e-05	0.000401597
AT5G11160	27.4479	42.7235	41.628	85.8974	80.9261	92.2283	1.14558	0.213776	-5.3588	8.37748e-08	2.61757e-06
AT5G04250	40.5752	72.4442	36.1983	165.114	79.9851	104.664	1.14437	0.286568	-3.99335	6.51462e-05	0.00111219
AT1G08477	192.135	180.182	165.607	381.766	387.693	431.089	1.1433	0.12709	-8.99599	2.34115e-19	3.3231e-17
AT3G24840	38.1884	30.6495	41.628	102.122	78.1031	80.8293	1.14273	0.313553	-3.64446	0.000267958	0.00385581
AT2G08475	62.0562	33.4358	39.8181	97.3503	109.156	99.4822	1.14248	0.247309	-4.61963	3.84417e-06	8.85183e-05
AT3G55430	165.881	243.338	155.653	343.589	488.38	452.851	1.14139	0.226753	-5.03361	4.81316e-07	1.33399e-05
AT5G24570	89.5041	164.393	149.318	297.777	319.94	310.882	1.14134	0.242951	-4.69781	2.62972e-06	6.27345e-05
AT3G15810	124.112	120.74	95.0205	277.735	263.48	223.835	1.1403	0.191417	-5.95717	2.56637e-09	1.04506e-07
AT5G62430	204.069	179.253	161.082	454.302	364.168	405.183	1.13637	0.193034	-5.88687	3.9358e-09	1.55183e-07
AT5G62130	64.443	71.5154	76.0164	170.84	164.675	151.296	1.1337	0.255577	-4.43587	9.17027e-06	0.000193042
AT2G28550	323.408	554.476	348.408	1110.94	838.432	815.546	1.13298	0.201245	-5.62985	1.80367e-08	6.34381e-07
AT5G13100	210.036	162.535	148.413	347.407	418.746	388.602	1.1314	0.160501	-7.04917	1.79991e-12	1.13549e-10
AT1G17090	8.35372	7.43017	10.8595	22.906	24.466	17.6166	1.13121	0.350877	-3.22394	0.0012644	0.0148921
AT4G16690	21.481	23.2193	20.814	36.2678	66.8111	52.8499	1.12999	0.360242	-3.13676	0.00170828	0.0193183
AT5G19850	65.6363	65.014	55.2024	113.575	143.032	158.55	1.12867	0.191104	-5.90607	3.50367e-09	1.39809e-07
AT1G28380	180.202	135.601	141.173	353.134	315.235	341.97	1.12834	0.154093	-7.32245	2.43487e-13	1.77889e-11
AT1G61380	149.174	141.173	93.2106	312.094	270.067	265.286	1.1261	0.165165	-6.81805	9.22838e-12	5.19508e-10
AT2G01150	31.0281	27.8631	38.0082	99.2592	59.2831	65.2852	1.12606	0.283786	-3.96799	7.248e-05	0.00122581
AT5G05270	47.7355	61.2989	64.252	105.94	149.619	136.788	1.12405	0.208994	-5.3784	7.51496e-08	2.36293e-06
AT4G01120	76.3768	78.0168	97.7354	183.248	218.312	162.695	1.12171	0.190862	-5.87707	4.17594e-09	1.63355e-07
AT2G18890	147.98	147.675	113.12	312.094	283.241	301.555	1.12164	0.127235	-8.81551	1.19141e-18	1.53738e-16
AT3G57930	59.6694	52.94	41.628	90.6694	163.734	98.4459	1.11758	0.302557	-3.69376	0.000220958	0.00328659
AT1G68570	75.1834	96.5922	90.4957	201.382	225.84	156.477	1.11718	0.16675	-6.69971	2.08834e-11	1.10078e-09
AT1G05557	5.96694	7.43017	12.6694	16.2251	24.466	23.8343	1.11465	0.403275	-2.76401	0.00570965	0.0511321
AT2G36420	45.3487	33.4358	47.9627	85.8974	95.9821	101.555	1.11457	0.23211	-4.80189	1.57177e-06	3.9587e-05
AT2G46600	226.744	162.535	74.2065	427.578	328.409	315.027	1.11343	0.327144	-3.40348	0.000665334	0.00861336
AT3G25610	51.3157	33.4358	33.4834	91.6238	81.8671	94.3008	1.11287	0.290285	-3.83369	0.000126233	0.00199881
AT2G30990	184.975	172.751	170.132	396.082	384.87	375.131	1.11262	0.140791	-7.90263	2.73085e-15	2.58417e-13
AT5G58650	52.5091	29.7207	38.9132	87.8062	124.212	63.2126	1.1119	0.304278	-3.65421	0.000257971	0.00373775
AT2G17480	112.178	138.387	114.93	215.698	343.465	260.104	1.11145	0.246061	-4.51698	6.27292e-06	0.000137437
AT4G19520	325.795	366.865	266.057	568.831	915.594	627.981	1.1106	0.187713	-5.91651	3.28848e-09	1.31751e-07
AT2G05940	128.886	117.025	114.93	230.014	269.126	290.156	1.11026	0.153666	-7.22516	5.0052e-13	3.51461e-11
AT3G11030	32.2215	52.0112	43.4379	118.347	87.5131	80.8293	1.10964	0.21426	-5.17896	2.23126e-07	6.58836e-06
AT3G61580	1546.63	1501.82	1333	3146.71	3448.77	2983.43	1.10929	0.139223	-7.9677	1.61649e-15	1.5824e-13
AT3G24190	269.706	328.785	253.388	681.452	582.48	605.183	1.10925	0.151095	-7.34139	2.11386e-13	1.55006e-11
AT3G02250	340.116	384.511	258.818	747.307	702.928	699.484	1.10866	0.148665	-7.45745	8.82134e-14	6.71639e-12
AT1G78100	163.494	144.888	105.88	195.655	470.501	278.757	1.1082	0.305928	-3.62243	0.00029185	0.0041426
AT1G33720	52.5091	52.0112	45.2479	148.889	97.8641	94.3008	1.10776	0.290623	-3.81166	0.000138038	0.00216846
AT2G02450	62.0562	105.88	95.9255	206.154	170.321	211.4	1.10673	0.201645	-5.48852	4.05315e-08	1.35368e-06
AT3G50910	29.8347	79.8743	38.0082	132.664	102.569	101.555	1.10633	0.273247	-4.04881	5.14787e-05	0.000905296
AT1G53430	410.525	363.15	314.925	784.529	858.193	726.427	1.10402	0.147034	-7.50862	5.97528e-14	4.69331e-12
AT1G05303	5.96694	13.9316	12.6694	20.0427	19.761	39.3784	1.10206	0.373707	-2.949	0.00318809	0.0322411
AT5G58620	40.5752	66.8715	33.4834	88.7606	125.153	101.555	1.10199	0.250468	-4.39975	1.08376e-05	0.000223408
AT5G01200	8.35372	12.074	16.2892	45.8119	22.584	20.7254	1.1005	0.405251	-2.7156	0.00661567	0.0574341
AT3G19150	25.0611	23.2193	25.3388	60.1281	56.4601	48.7048	1.10043	0.27584	-3.98936	6.62507e-05	0.0011262
AT1G25425	42.962	34.3645	33.4834	114.53	74.3391	61.1401	1.10031	0.289398	-3.80205	0.000143501	0.00224187
AT2G21330	4130.32	3042.65	1968.28	5422.03	7538.36	7228	1.09863	0.236423	-4.64689	3.36981e-06	7.87822e-05
AT4G04330	367.564	353.862	357.458	977.321	616.356	743.007	1.09323	0.139006	-7.86463	3.70179e-15	3.40565e-13
AT2G38640	52.5091	44.581	35.2933	94.4871	103.51	92.2283	1.08754	0.250619	-4.33941	1.42863e-05	0.000287928
AT5G50100	71.6033	84.5182	88.6858	185.157	185.377	164.767	1.08689	0.193297	-5.62291	1.87769e-08	6.59247e-07
AT1G62180	424.846	393.799	313.115	779.757	823.376	822.8	1.08433	0.140284	-7.72954	1.07935e-14	9.32561e-13
AT2G34720	90.6975	88.2333	85.9709	228.105	175.967	178.239	1.08044	0.243796	-4.43171	9.34878e-06	0.000196176
AT1G58280	22.6744	21.3617	23.5289	48.6752	59.2831	42.4872	1.07947	0.283687	-3.80516	0.000141712	0.00221915
AT5G62910	118.145	87.3045	60.6321	230.014	168.439	176.166	1.07871	0.224552	-4.80382	1.55663e-06	3.92556e-05
AT2G37240	81.1504	97.521	68.7767	204.245	182.554	150.26	1.07846	0.206098	-5.23275	1.67005e-07	5.03601e-06
AT4G23000	29.8347	23.2193	29.8636	67.7635	63.9881	54.9224	1.07704	0.322365	-3.34105	0.000834629	0.0104238
AT1G13390	82.3438	94.7347	72.3966	226.196	180.672	132.643	1.07633	0.203523	-5.2885	1.23325e-07	3.78781e-06
AT3G26910	50.1223	55.7263	59.7272	129.8	130.799	98.4459	1.07357	0.212336	-5.056	4.28137e-07	1.19999e-05
AT4G25700	105.018	96.5922	72.3966	217.607	157.147	216.581	1.07189	0.218609	-4.90323	9.42712e-07	2.46819e-05
AT1G78310	21.481	18.5754	25.3388	60.1281	38.5811	46.6323	1.07112	0.307316	-3.48541	0.000491381	0.00656702
AT2G26560	82.3438	65.014	54.2974	260.555	102.569	99.4822	1.07102	0.371233	-2.88503	0.00391371	0.0379567
AT3G46900	7.16033	6.5014	8.14461	15.2706	14.115	22.798	1.07017	0.395014	-2.7092	0.00674451	0.0583324
AT1G63830	113.372	128.17	69.6817	185.157	237.132	247.669	1.07004	0.224971	-4.75633	1.97145e-06	4.80695e-05
AT1G44100	116.952	110.524	64.252	157.478	322.763	161.659	1.06967	0.293361	-3.64625	0.00026609	0.00383726
AT2G08740	20.2876	10.2165	13.5744	33.4045	38.5811	24.8705	1.06885	0.31626	-3.37967	0.000725742	0.00929848
AT2G39870	156.334	52.94	141.173	266.282	320.881	188.602	1.06744	0.30091	-3.54737	0.000389094	0.00534721
AT5G55340	8.35372	7.43017	9.04957	24.8148	15.997	16.5804	1.06699	0.383819	-2.77992	0.00543724	0.0491801
AT3G44630	247.031	246.124	202.71	458.119	555.191	456.996	1.0658	0.131848	-8.08357	6.28962e-16	6.24936e-14
AT5G56630	127.693	95.6634	84.161	261.51	167.498	230.052	1.06485	0.213711	-4.98266	6.27149e-07	1.68415e-05
AT4G27280	40.5752	39.0084	39.8181	62.037	132.681	75.6479	1.06367	0.362725	-2.93246	0.00336294	0.0337517
AT3G13520	972.611	1026.29	617.181	1873.52	2054.21	1668.4	1.06306	0.204282	-5.20388	1.95175e-07	5.83236e-06
AT3G17790	75.1834	55.7263	24.4338	88.7606	119.507	141.969	1.06196	0.359908	-2.95065	0.00317108	0.0321018
AT1G80110	26.2545	21.3617	17.1942	75.3988	32.935	36.2695	1.06161	0.345446	-3.07314	0.00211817	0.0231658
AT3G21560	96.6644	117.025	130.314	264.373	227.722	245.597	1.05882	0.186987	-5.66254	1.49151e-08	5.35006e-07
AT1G72416	81.1504	72.4442	114.93	143.162	342.524	125.389	1.0578	0.370427	-2.85561	0.00429537	0.0406852
AT1G46768	9.5471	29.7207	13.5744	49.6296	31.053	40.4146	1.05503	0.330486	-3.19234	0.00141123	0.0163331
AT5G14740	2787.75	3302.71	2984.55	6903.28	6319.77	5903.64	1.05149	0.154878	-6.78919	1.12767e-11	6.26255e-10
AT5G49900	48.9289	42.7235	63.347	111.667	75.2801	150.26	1.05009	0.275251	-3.81504	0.00013616	0.00214064
AT5G14370	169.461	165.321	153.843	426.624	306.766	293.265	1.04891	0.153604	-6.82867	8.57029e-12	4.86781e-10
AT1G02270	105.018	138.387	129.409	268.191	253.129	265.286	1.04795	0.14561	-7.19697	6.15639e-13	4.23321e-11
AT5G00880	28.6413	26.9344	25.3388	46.7663	63.0471	65.2852	1.04778	0.27879	-3.75832	0.000171061	0.00262091
AT3G53990	548.958	509.895	401.801	1148.16	961.703	945.081	1.04588	0.146881	-7.12064	1.07425e-12	7.06874e-11
AT1G23730	89.5041	100.307	61.5371	122.165	223.017	187.565	1.04535	0.232038	-4.50508	6.63488e-06	0.000144571
AT1G72210	23.8678	30.6495	22.6239	53.4472	56.4601	55.9587	1.04251	0.277378	-3.75846	0.000170961	0.00262091
AT3G57020	87.1173	116.096	68.7767	165.114	222.076	189.638	1.04135	0.230034	-4.52693	5.98463e-06	0.000131266
AT3G05870	33.4149	39.0084	38.0082	83.0341	86.5721	71.5028	1.04129	0.297088	-3.50497	0.00045665	0.00618158
AT4G14103	11.9339	10.2165	16.2892	36.2678	28.23	23.8343	1.04113	0.385706	-2.69928	0.00694897	0.0597792
AT5G67480	196.909	300.922	140.268	449.529	530.725	368.913	1.03955	0.227204	-4.57541	4.7529e-06	0.000106362
AT3G14890	44.1554	87.3045	65.1569	164.159	108.215	155.441	1.03868	0.285121	-3.64296	0.000269526	0.00386995
AT2G26080	1689.84	1729.37	1483.22	3066.54	3480.76	3604.16	1.03856	0.111385	-9.32412	1.11905e-20	1.82277e-18
AT4G29440	99.0512	128.17	109.5	230.014	236.191	240.415	1.03856	0.173772	-5.97658	2.27874e-09	9.41438e-08
AT1G79520	45.3487	35.2933	23.5289	64.9002	92.2181	68.394	1.0371	0.322189	-3.21891	0.00128677	0.0151175
AT5G11790	298.347	459.742	221.714	788.347	603.182	660.106	1.0369	0.187935	-5.51732	3.44215e-08	1.16133e-06
AT4G27830	173.041	132.814	123.074	401.809	273.831	230.052	1.03473	0.224488	-4.6093	4.04029e-06	9.23921e-05
AT1G19770	293.573	225.691	285.966	369.359	679.403	674.613	1.03138	0.288841	-3.57077	0.000355939	0.00494286
AT4G35300	232.711	223.834	155.653	457.165	390.516	420.727	1.03104	0.164739	-6.25862	3.88402e-10	1.76218e-08
AT4G10040	75.1834	61.2989	38.0082	124.074	115.743	129.534	1.02951	0.268477	-3.83463	0.000125755	0.00199282
AT5G11110	33.4149	22.2905	38.0082	53.4472	73.3981	74.6116	1.0293	0.278215	-3.69965	0.000215895	0.00321851
AT4G09970	8.35372	11.1453	21.719	40.0854	22.584	31.0882	1.0286	0.319575	-3.21865	0.00128794	0.0151175
AT2G24100	57.2826	71.5154	38.9132	127.892	88.4541	134.715	1.02772	0.216107	-4.75559	1.97865e-06	4.81859e-05
AT5G65630	274.479	237.765	238.004	477.208	588.126	478.758	1.02767	0.132063	-7.78169	7.156e-15	6.3484e-13
AT1G68490	343.696	435.594	422.615	1015.5	806.438	669.432	1.0257	0.144103	-7.11781	1.09656e-12	7.1917e-11
AT4G20890	478.549	422.591	412.66	988.774	893.01	823.837	1.02538	0.13029	-7.86998	3.54691e-15	3.27834e-13
AT4G32770	94.2777	80.8031	85.9709	185.157	183.495	169.949	1.02466	0.167386	-6.12154	9.26763e-10	4.03874e-08
AT5G27930	116.952	119.811	80.5412	267.236	223.958	167.876	1.02412	0.20164	-5.07895	3.79531e-07	1.07284e-05
AT3G58790	114.565	158.82	140.268	259.601	350.994	251.814	1.02403	0.189756	-5.39653	6.79429e-08	2.15681e-06
AT5G51040	51.3157	91.9484	59.7272	146.98	144.914	134.715	1.02085	0.221729	-4.60406	4.14331e-06	9.44218e-05
AT5G59790	36.995	49.2249	35.2933	96.3959	61.1651	99.4822	1.02048	0.259589	-3.93113	8.45464e-05	0.00140948
AT3G11820	183.782	130.028	103.165	295.869	264.421	299.483	1.02036	0.201409	-5.06612	4.06015e-07	1.14121e-05
AT4G28680	19.0942	13.0028	10.8595	26.7236	30.112	36.2695	1.01897	0.372432	-2.736	0.00621917	0.0546772
AT1G10470	335.342	339.93	265.152	813.162	625.766	509.846	1.01888	0.191858	-5.31061	1.09261e-07	3.37672e-06
AT1G52280	118.145	138.387	97.7354	237.649	250.306	238.343	1.01808	0.141625	-7.1886	6.54579e-13	4.45954e-11
AT2G31370	128.886	143.031	108.595	251.966	289.828	239.379	1.01783	0.159927	-6.3643	1.96179e-10	9.17289e-09
AT1G17050	150.367	156.962	77.8263	272.963	260.657	260.104	1.01701	0.200857	-5.06337	4.119e-07	1.15611e-05
AT4G30440	778.089	583.268	612.656	1143.39	1772.85	1156.48	1.0163	0.187465	-5.42128	5.91726e-08	1.9058e-06
AT5G11070	137.24	148.603	126.694	202.336	332.173	334.716	1.01628	0.277095	-3.66762	0.000244818	0.00357722
AT2G07765	13.1273	17.6467	19.0041	46.7663	28.23	35.2333	1.01391	0.348448	-2.90978	0.00361683	0.0357225
AT4G36920	91.8909	85.447	95.9255	175.612	251.247	141.969	1.01316	0.22648	-4.47349	7.69519e-06	0.000164429
AT2G37460	79.957	55.7263	45.2479	146.025	122.33	111.917	1.01291	0.285004	-3.55401	0.000379411	0.00523952
AT5G45110	176.621	121.669	131.219	221.424	338.76	326.426	1.01156	0.225852	-4.47884	7.50494e-06	0.000161405
AT3G63200	245.838	164.393	141.173	402.763	414.982	315.027	1.01116	0.20177	-5.01146	5.40191e-07	1.47657e-05
AT1G48750	26.2545	28.7919	17.1942	36.2678	57.4011	58.0313	1.00912	0.267804	-3.76812	0.000164483	0.00253388
AT1G55110	59.6694	71.5154	73.3015	154.615	111.038	160.622	1.00734	0.227056	-4.43654	9.14169e-06	0.000192644
AT2G23000	72.7967	52.0112	38.0082	109.758	113.861	113.99	1.00722	0.261143	-3.85696	0.000114806	0.00184731
AT1G59910	116.952	115.168	106.785	216.652	225.84	252.85	1.00542	0.199986	-5.02744	4.97063e-07	1.36809e-05
AT2G47490	83.5372	85.447	76.9214	134.573	185.377	181.348	1.00229	0.174994	-5.7276	1.01861e-08	3.72779e-07
AT5G46510	60.8628	63.1564	79.6362	147.934	136.445	133.679	1.00085	0.178026	-5.62191	1.88855e-08	6.61893e-07
AT4G31050	47.7355	41.7947	49.7726	26.7236	20.702	18.6529	-1.00237	0.306147	3.27414	0.00105983	0.0128342
AT2G04240	76.3768	84.5182	69.6817	54.4017	22.584	34.197	-1.00363	0.271094	3.70213	0.000213795	0.00319198
AT2G20180	153.947	129.099	171.942	75.3988	76.2211	72.5391	-1.00387	0.19309	5.19898	2.00386e-07	5.97011e-06
AT4G12690	48.9289	45.5098	56.1073	29.5869	22.584	19.6892	-1.00556	0.311917	3.22381	0.00126499	0.0148921
AT3G54880	95.471	94.7347	97.7354	67.7635	28.23	43.5234	-1.00979	0.246358	4.09887	4.15174e-05	0.000746637
AT2G24550	127.693	128.17	60.6321	51.5384	53.6371	44.5597	-1.0124	0.29397	3.44388	0.000573421	0.00757647
AT1G28330	389.044	365.007	626.23	319.729	177.849	168.912	-1.01673	0.257349	3.95078	7.78967e-05	0.00131072
AT5G26980	39.3818	47.3673	41.628	19.0883	27.289	13.4715	-1.01719	0.333915	3.04624	0.00231725	0.0249878
AT5G05690	928.456	725.37	659.714	379.857	406.513	337.825	-1.01921	0.185	5.50924	3.6039e-08	1.20974e-06
AT2G16750	50.1223	73.3729	42.533	21.9515	23.525	33.1607	-1.01971	0.294053	3.46776	0.00052481	0.00698528
AT1G68840	491.676	367.793	369.222	128.846	248.424	200.001	-1.01999	0.299683	3.40357	0.000665125	0.00861336
AT3G05160	103.825	127.242	130.314	46.7663	82.8081	41.4509	-1.02724	0.270938	3.79144	0.000149777	0.0023344
AT1G26580	214.81	289.777	230.764	131.709	128.917	95.3371	-1.02889	0.182681	5.63218	1.7795e-08	6.28103e-07
AT1G11440	64.443	75.2305	55.2024	25.7692	29.171	37.3058	-1.03437	0.266591	3.88	0.000104457	0.00169588
AT2G01940	44.1554	63.1564	72.3966	38.1766	29.171	16.5804	-1.0375	0.29905	3.46931	0.000521793	0.00695444
AT1G77210	140.82	114.239	189.136	81.1253	66.8111	65.2852	-1.03765	0.212753	4.87724	1.07578e-06	2.80183e-05
AT4G30130	38.1884	63.1564	53.3925	20.0427	30.112	20.7254	-1.03824	0.341691	3.03854	0.00237728	0.0254402
AT1G51430	101.438	83.5894	60.6321	52.4928	30.112	32.1244	-1.03908	0.276016	3.76457	0.000166837	0.00256411
AT2G32010	210.036	199.686	242.529	137.436	82.8081	93.2645	-1.04245	0.181063	5.75742	8.54112e-09	3.16069e-07
AT3G60110	33.4149	45.5098	38.9132	21.9515	15.997	16.5804	-1.04487	0.326159	3.20356	0.00135739	0.0157958
AT5G16370	115.759	123.527	137.553	62.037	60.2241	56.995	-1.04671	0.222722	4.69965	2.60608e-06	6.22453e-05
AT4G04630	82.3438	59.4414	64.252	39.131	27.289	29.0156	-1.05301	0.273765	3.84639	0.000119873	0.00191488
AT1G12080	73.9901	81.7319	149.318	53.4472	28.23	55.9587	-1.05441	0.363072	2.90415	0.00368256	0.0361382
AT4G27440	7396.62	7227.7	6721.12	3863.47	3141.06	3176.18	-1.05569	0.157832	6.68871	2.2515e-11	1.16515e-09
AT1G56220	1475.03	1060.66	1269.65	847.521	446.035	502.592	-1.06043	0.207027	5.12217	3.02036e-07	8.69865e-06
AT5G56100	113.372	88.2333	59.7272	58.2193	23.525	36.2695	-1.06057	0.330759	3.20647	0.00134374	0.0156707
AT3G14760	54.8958	34.3645	53.3925	14.3162	21.643	27.9794	-1.06289	0.348966	3.04581	0.00232052	0.0249937
AT4G18220	68.0231	60.3701	99.5453	37.2222	32.935	36.2695	-1.06353	0.25345	4.19623	2.714e-05	0.00051218
AT1G20620	13702.5	10692	10061.3	5838.16	5722.23	4689.13	-1.06399	0.184361	5.77126	7.86788e-09	2.92244e-07
AT1G25440	1282.89	1497.18	931.201	667.136	474.265	602.074	-1.06526	0.188305	5.65709	1.5396e-08	5.50268e-07
AT3G49110	300.734	260.985	304.971	167.023	104.451	129.534	-1.0724	0.247643	4.33045	1.48806e-05	0.000298393
AT2G33051	150.367	106.809	192.756	53.4472	66.8111	86.0106	-1.07328	0.273598	3.92282	8.75193e-05	0.00145079
AT2G27820	241.064	184.825	157.463	94.4871	90.3361	87.0469	-1.07514	0.158749	6.77261	1.26484e-11	6.90518e-10
AT2G41870	91.8909	145.817	99.5453	62.9914	42.3451	48.7048	-1.07901	0.275989	3.90961	9.24455e-05	0.00152245
AT4G35750	352.049	316.711	281.442	163.205	133.622	145.078	-1.07933	0.191678	5.63097	1.79197e-08	6.31384e-07
AT1G72645	50.1223	54.7975	45.2479	29.5869	18.82	19.6892	-1.07935	0.274542	3.93147	8.44263e-05	0.00140867
AT5G10550	218.39	208.045	247.958	108.803	113.861	92.2283	-1.08064	0.176792	6.11251	9.8074e-10	4.2553e-08
AT4G27745	46.5421	26.9344	35.2933	15.2706	19.761	11.399	-1.08403	0.376492	2.87929	0.00398573	0.0384702
AT4G11320	205.263	224.763	152.938	89.715	83.7491	93.2645	-1.08489	0.238796	4.54315	5.5419e-06	0.000122501
AT1G10150	109.792	110.524	85.9709	39.131	52.6961	48.7048	-1.08502	0.220101	4.92965	8.23772e-07	2.17397e-05
AT4G08305	224.357	163.464	457.003	126.937	145.855	112.954	-1.08753	0.272407	3.99232	6.54294e-05	0.00111606
AT2G45510	35.8016	26.9344	28.9586	10.4986	13.174	16.5804	-1.09025	0.340331	3.20351	0.00135765	0.0157958
AT2G17787	39.3818	40.8659	49.7726	15.2706	20.702	22.798	-1.09232	0.289869	3.76833	0.000164341	0.00253388
AT2G33050	146.787	108.666	193.661	53.4472	67.7521	81.8655	-1.09368	0.271143	4.03359	5.49313e-05	0.000958379
AT5G26600	114.565	164.393	99.5453	46.7663	72.4571	53.8862	-1.09464	0.22027	4.96954	6.71126e-07	1.79256e-05
AT1G75380	1730.41	1754.45	1314.9	806.481	741.509	663.214	-1.09691	0.179764	6.10197	1.0477e-09	4.53593e-08
AT4G27050	57.2826	52.0112	68.7767	29.5869	21.643	29.0156	-1.10019	0.271271	4.05566	4.99919e-05	0.000883057
AT1G29357	39.3818	52.94	42.533	19.0883	17.879	23.8343	-1.10065	0.28699	3.83514	0.000125492	0.00199184
AT5G21170	132.466	171.823	212.665	95.4415	63.9881	78.7567	-1.10244	0.207082	5.32368	1.0169e-07	3.15255e-06
AT5G63480	127.693	123.527	117.644	85.8974	35.7581	44.5597	-1.10263	0.263509	4.18442	2.85889e-05	0.000537483
AT1G56010	65.6363	65.014	44.3429	18.1339	24.466	34.197	-1.10307	0.312305	3.53202	0.000412393	0.00562848
AT5G24890	251.805	245.196	218.095	94.4871	111.038	121.244	-1.10737	0.180874	6.12231	9.22264e-10	4.02796e-08
AT1G52040	294.767	825.678	351.123	184.202	256.893	203.109	-1.11084	0.304163	3.65211	0.000260094	0.00376444
AT4G27470	44.1554	39.9372	40.7231	10.4986	27.289	15.5441	-1.11947	0.356872	3.1369	0.00170746	0.0193183
AT2G45450	36.995	34.3645	41.628	13.3618	14.115	21.7617	-1.1327	0.296549	3.81959	0.000133673	0.00210822
AT1G69530	1293.63	934.344	817.176	530.655	213.607	572.022	-1.13422	0.300322	3.77667	0.00015894	0.00245985
AT2G18440	455.874	515.468	336.644	228.105	171.262	187.565	-1.13495	0.166809	6.80387	1.01844e-11	5.68495e-10
AT3G09335	17.9008	13.0028	25.3388	5.72649	8.46901	8.29018	-1.14253	0.415975	2.74663	0.00602102	0.0533214
AT1G72830	22.6744	26.9344	16.2892	5.72649	11.292	9.32645	-1.14694	0.408744	2.80601	0.00501593	0.04604
AT1G66190	26.2545	50.1536	49.7726	13.3618	18.82	19.6892	-1.14796	0.398367	2.88167	0.00395573	0.0382336
AT2G24220	47.7355	27.8631	39.8181	12.4074	17.879	18.6529	-1.14868	0.310361	3.70111	0.000214656	0.00320244
AT5G10650	62.0562	59.4414	46.1528	20.0427	29.171	21.7617	-1.15409	0.295863	3.90075	9.58968e-05	0.00156974
AT5G03200	33.4149	36.2221	60.6321	19.0883	21.643	14.5078	-1.16057	0.313975	3.69638	0.000218692	0.00325776
AT3G58710	33.4149	29.7207	23.5289	12.4074	12.233	9.32645	-1.16259	0.414968	2.80163	0.00508453	0.0465019
AT5G43190	44.1554	41.7947	51.5826	17.1795	27.289	13.4715	-1.16433	0.309602	3.76072	0.000169426	0.00259987
AT5G12950	787.636	454.169	595.462	289.188	261.598	247.669	-1.17421	0.196601	5.97253	2.33598e-09	9.59102e-08
AT4G25420	20.2876	24.1481	22.6239	3.81766	10.351	12.4353	-1.17479	0.401502	2.926	0.00343349	0.0343106
AT3G63215	44.1554	28.7919	28.0537	18.1339	12.233	10.3627	-1.17696	0.348447	3.37772	0.000730907	0.00935862
AT5G39080	156.334	163.464	132.124	50.584	84.6901	59.0675	-1.177	0.219108	5.37179	7.79603e-08	2.44358e-06
AT3G26932	109.792	121.669	108.595	58.2193	41.4041	45.596	-1.17841	0.257158	4.58243	4.59611e-06	0.000103319
AT5G48820	16.7074	16.7179	20.814	7.63532	6.58701	7.25391	-1.18022	0.401614	2.93869	0.00329605	0.033172
AT5G15537	29.8347	27.8631	38.0082	13.3618	13.174	13.4715	-1.18144	0.321975	3.66936	0.000243154	0.00355815
AT3G04720	137.24	95.6634	69.6817	46.7663	33.876	38.3421	-1.18456	0.401449	2.9507	0.00317051	0.0321018
AT2G22690	40.5752	47.3673	34.3884	16.2251	16.938	17.6166	-1.19007	0.296108	4.01905	5.84328e-05	0.0010106
AT5G02515	171.848	220.119	292.301	137.436	78.1031	77.7204	-1.19082	0.235867	5.04869	4.44843e-07	1.24156e-05
AT4G11360	131.273	99.3785	106.785	57.2649	41.4041	43.5234	-1.19194	0.25914	4.5996	4.23295e-06	9.61338e-05
AT3G51450	69.2165	270.272	66.0619	69.6723	53.6371	36.2695	-1.19659	0.399448	2.9956	0.00273902	0.0286171
AT5G54190	102.631	148.603	163.797	57.2649	53.6371	67.3577	-1.19702	0.217338	5.50765	3.63662e-08	1.21866e-06
AT1G68330	38.1884	15.7891	28.9586	8.58974	11.292	12.4353	-1.20257	0.385123	3.12256	0.00179284	0.0201057
AT5G18130	295.96	187.612	191.851	78.262	138.327	55.9587	-1.20436	0.331743	3.6304	0.000282988	0.00403699
AT2G22800	40.5752	29.7207	32.5785	15.2706	8.46901	17.6166	-1.21108	0.327967	3.6927	0.000221888	0.00329795
AT4G02075	68.0231	92.8771	47.0578	37.2222	27.289	20.7254	-1.21614	0.284593	4.27327	1.92627e-05	0.000376075
AT2G08765	17.9008	13.9316	22.6239	11.453	5.64601	3.10882	-1.21998	0.419683	2.9069	0.00365029	0.0359636
AT5G54520	29.8347	34.3645	35.2933	14.3162	12.233	13.4715	-1.22272	0.340744	3.58837	0.000332749	0.00465989
AT1G71030	682.618	560.978	670.573	314.003	241.837	248.705	-1.22319	0.200544	6.09935	1.065e-09	4.6008e-08
AT4G30660	420.073	303.708	596.367	182.293	206.079	167.876	-1.22348	0.201037	6.08585	1.15876e-09	4.97342e-08
AT4G40070	13.1273	25.0768	22.6239	8.58974	4.70501	9.32645	-1.22863	0.433209	2.83612	0.00456656	0.0427245
AT1G59590	34.6083	18.5754	27.1487	4.77208	13.174	11.399	-1.23453	0.444979	2.77435	0.00553114	0.0499134
AT4G15030	31.0281	37.1509	32.5785	13.3618	11.292	15.5441	-1.23791	0.322085	3.84341	0.000121335	0.00193668
AT2G22810	22.6744	27.8631	22.6239	9.54415	8.46901	9.32645	-1.24183	0.401451	3.09335	0.00197908	0.0219222
AT3G61950	17.9008	32.507	65.1569	9.54415	18.82	13.4715	-1.24431	0.449088	2.77074	0.00559283	0.0503583
AT5G40450	1677.9	2894.98	2838.85	1112.85	834.668	1018.66	-1.25384	0.282876	4.43246	9.31644e-06	0.000195704
AT4G21410	46.5421	81.7319	56.1073	21.9515	21.643	30.0519	-1.2555	0.304701	4.12043	3.78162e-05	0.000688171
AT2G26110	134.853	130.028	134.839	58.2193	51.7551	52.8499	-1.25595	0.222202	5.6523	1.58318e-08	5.64828e-07
AT4G13575	751.834	912.982	893.193	399.9	316.176	346.115	-1.25821	0.14402	8.73632	2.40829e-18	2.99109e-16
AT2G15050	466.615	452.312	495.916	214.743	194.787	176.166	-1.26303	0.132694	9.51838	1.75902e-21	2.91294e-19
AT2G22980	353.243	342.717	393.656	207.108	123.271	116.063	-1.26354	0.19555	6.46148	1.03685e-10	5.02545e-09
AT3G52060	109.792	96.5922	132.124	55.3561	39.5221	42.4872	-1.26602	0.228203	5.54777	2.89333e-08	9.86214e-07
AT2G38820	69.2165	53.8687	44.3429	20.0427	16.938	27.9794	-1.27055	0.314672	4.0377	5.3978e-05	0.000944236
AT2G20110	25.0611	10.2165	29.8636	5.72649	6.58701	10.3627	-1.27202	0.463144	2.74648	0.00602388	0.0533214
AT3G02550	29.8347	36.2221	18.0991	9.54415	13.174	8.29018	-1.27582	0.387215	3.29487	0.000984657	0.0120438
AT5G64190	50.1223	26.9344	31.6735	12.4074	15.056	13.4715	-1.27856	0.363282	3.51948	0.0004324	0.00587331
AT1G27210	227.937	266.557	327.594	98.3047	124.212	109.845	-1.28768	0.181222	7.10555	1.19844e-12	7.80831e-11
AT1G29510	60.8628	59.4414	39.8181	23.8604	25.407	11.399	-1.29875	0.283132	4.58708	4.49493e-06	0.000101504
AT2G34810	158.721	283.275	219.905	71.5811	115.743	72.5391	-1.3011	0.240482	5.41039	6.2888e-08	2.01566e-06
AT5G62280	89.5041	130.028	126.694	45.8119	33.876	43.5234	-1.30252	0.408568	3.18802	0.00143253	0.0165411
AT5G20030	16.7074	14.8603	15.3843	4.77208	5.64601	5.18136	-1.30811	0.437745	2.9883	0.00280533	0.029172
AT3G18980	94.2777	150.461	149.318	55.3561	47.9911	48.7048	-1.31751	0.263059	5.00841	5.4882e-07	1.49399e-05
AT5G52900	62.0562	91.0196	87.7808	51.5384	24.466	14.5078	-1.31779	0.328486	4.01171	6.02793e-05	0.00103892
AT1G32700	170.654	187.612	171.942	82.0797	67.7521	56.995	-1.31914	0.214714	6.1437	8.06209e-10	3.57611e-08
AT4G35770	188.555	338.073	401.801	161.296	106.333	61.1401	-1.32179	0.407785	3.24138	0.00118951	0.0141335
AT5G07150	34.6083	43.6522	38.0082	14.3162	17.879	11.399	-1.32222	0.304989	4.33531	1.45558e-05	0.000292766
AT5G01155	295.96	50.1536	42.533	50.584	31.053	39.3784	-1.32425	0.478746	2.76607	0.00567366	0.0509016
AT2G28160	11.9339	10.2165	19.0041	4.77208	3.76401	5.18136	-1.32672	0.479719	2.76561	0.00568158	0.0509266
AT5G21940	318.635	333.429	161.082	113.575	83.7491	109.845	-1.33001	0.269997	4.926	8.39298e-07	2.20908e-05
AT4G16447	10.7405	12.074	19.9091	8.58974	0.941001	4.14509	-1.33213	0.450109	2.95958	0.0030806	0.0314906
AT3G26200	23.8678	20.433	29.8636	1.90883	11.292	10.3627	-1.33585	0.490243	2.72486	0.00643279	0.0560758
AT4G04845	34.6083	42.7235	44.3429	23.8604	9.41001	11.399	-1.3363	0.354771	3.76665	0.000165452	0.00254479
AT3G23550	53.7025	39.9372	29.8636	20.0427	13.174	7.25391	-1.34728	0.452307	2.97868	0.00289492	0.0299624
AT4G37610	53.7025	87.3045	99.5453	37.2222	24.466	25.9068	-1.3494	0.342007	3.94553	7.96229e-05	0.00133525
AT3G53800	310.281	311.138	284.157	125.983	122.33	100.518	-1.35355	0.171441	7.89514	2.89999e-15	2.71833e-13
AT3G22970	657.557	621.348	422.615	251.011	195.728	204.146	-1.35373	0.187829	7.20728	5.70788e-13	3.94549e-11
AT2G25590	59.6694	68.7291	47.0578	13.3618	24.466	26.9431	-1.35767	0.292117	4.64768	3.35683e-06	7.85712e-05
AT5G54630	224.357	292.563	261.533	106.894	94.1001	96.3733	-1.36275	0.187972	7.24973	4.1761e-13	2.94978e-11
AT5G07152	35.8016	45.5098	40.7231	14.3162	17.879	12.4353	-1.36306	0.299115	4.55698	5.18949e-06	0.000115482
AT3G52480	25.0611	22.2905	20.814	4.77208	8.46901	10.3627	-1.36349	0.385133	3.54032	0.000399649	0.00547335
AT3G50825	54.8958	19.5042	8.14461	8.58974	4.70501	9.32645	-1.37778	0.49781	2.76768	0.00564562	0.0506958
AT2G23430	34.6083	53.8687	70.5867	9.54415	29.171	16.5804	-1.38376	0.361234	3.83064	0.000127808	0.00202213
AT4G04835	28.6413	26.9344	34.3884	16.2251	4.70501	9.32645	-1.38911	0.41579	3.3409	0.000835058	0.0104238
AT3G19850	213.616	215.475	196.376	71.5811	87.5131	72.5391	-1.39136	0.210013	6.6251	3.47016e-11	1.76818e-09
AT1G04770	35.8016	61.2989	39.8181	21.9515	13.174	8.29018	-1.39182	0.426228	3.26544	0.00109295	0.0131471
AT1G29450	95.471	51.0824	79.6362	20.0427	37.6401	22.798	-1.39413	0.286874	4.85973	1.17546e-06	3.02967e-05
AT4G02555	11.9339	20.433	9.04957	4.77208	3.76401	3.10882	-1.3969	0.453647	3.07927	0.00207507	0.0227696
AT1G34640	60.8628	60.3701	80.5412	33.4045	15.056	23.8343	-1.40684	0.288628	4.87425	1.09221e-06	2.84089e-05
AT4G01460	95.471	104.022	105.88	23.8604	44.2271	41.4509	-1.40841	0.267928	5.25669	1.46674e-07	4.45675e-06
AT3G63210	145.593	99.3785	169.227	41.9943	63.0471	43.5234	-1.41747	0.254416	5.57147	2.52605e-08	8.71105e-07
AT1G29465	13.1273	16.7179	8.14461	2.86325	5.64601	2.07254	-1.41849	0.487547	2.90944	0.00362076	0.0357436
AT1G14920	400.978	256.341	317.64	108.803	153.383	87.0469	-1.42571	0.234203	6.08749	1.14693e-09	4.93328e-08
AT3G04975	41.7686	11.1453	8.14461	1.90883	7.52801	7.25391	-1.42723	0.497578	2.86836	0.00412612	0.0394962
AT3G20830	39.3818	24.1481	39.8181	10.4986	15.056	8.29018	-1.42924	0.378025	3.7808	0.000156323	0.00242503
AT5G44680	576.406	487.605	801.792	234.786	260.657	158.55	-1.44079	0.27352	5.26759	1.38227e-07	4.20649e-06
AT2G40610	526.284	374.295	519.445	188.02	139.268	180.311	-1.44251	0.222285	6.48948	8.61344e-11	4.21592e-09
AT1G22640	147.98	109.595	108.595	59.1737	27.289	42.4872	-1.44463	0.244742	5.90266	3.57687e-09	1.41875e-07
AT1G66230	34.6083	36.2221	28.9586	14.3162	15.056	3.10882	-1.44847	0.352536	4.10871	3.97877e-05	0.000720749
AT4G24050	75.1834	70.5866	79.6362	19.0883	29.171	27.9794	-1.45002	0.332343	4.36304	1.2827e-05	0.000261971
AT1G54050	35.8016	70.5866	59.7272	21.9515	11.292	21.7617	-1.45583	0.36855	3.95016	7.80983e-05	0.001313
AT2G21210	223.164	191.327	196.376	77.3076	61.1651	77.7204	-1.45875	0.206761	7.05525	1.72285e-12	1.0965e-10
AT4G34760	239.871	136.529	192.756	65.8546	62.1061	72.5391	-1.45932	0.215161	6.78243	1.18169e-11	6.52295e-10
AT2G39030	26.2545	52.94	9.95453	6.68091	11.292	7.25391	-1.45937	0.502143	2.90628	0.00365754	0.03599
AT1G10522	920.102	129.099	85.066	65.8546	100.687	123.316	-1.45983	0.527593	2.76696	0.0056582	0.0507858
AT2G44140	531.058	362.221	285.966	148.889	135.504	130.57	-1.46059	0.205979	7.09098	1.33163e-12	8.59162e-11
AT4G14270	249.418	204.33	131.219	77.3076	63.9881	63.2126	-1.46153	0.21996	6.64452	3.04211e-11	1.5702e-09
AT5G65683	119.339	112.381	102.26	36.2678	40.4631	39.3784	-1.46188	0.233564	6.25898	3.87491e-10	1.76207e-08
AT2G08730	10.7405	13.0028	8.14461	2.86325	2.823	2.07254	-1.46232	0.531232	2.7527	0.00591056	0.052529
AT3G06655	31.0281	32.507	27.1487	10.4986	11.292	8.29018	-1.46354	0.36795	3.97756	6.96249e-05	0.00117953
AT2G25900	624.142	482.032	504.061	221.424	155.265	187.565	-1.46815	0.221591	6.62548	3.46121e-11	1.76815e-09
AT1G58150	10.7405	9.28771	15.3843	5.72649	0.941001	2.07254	-1.49924	0.514054	2.91649	0.00353991	0.0351374
AT5G57780	88.3107	76.1592	90.4957	37.2222	20.702	27.9794	-1.50587	0.258205	5.8321	5.47354e-09	2.07577e-07
AT2G20410	731.547	106.809	98.6403	30.5413	99.7461	92.2283	-1.51489	0.545363	2.77777	0.00547332	0.049484
AT1G07393	21.481	27.8631	9.95453	9.54415	3.76401	2.07254	-1.5159	0.456432	3.3212	0.000896311	0.0111044
AT2G25200	60.8628	62.2277	52.4875	17.1795	25.407	15.5441	-1.51655	0.271199	5.59204	2.2442e-08	7.79665e-07
AT4G06120	77.5702	90.0908	63.347	30.5413	23.525	22.798	-1.51777	0.258196	5.87838	4.14311e-09	1.6239e-07
AT3G26740	1755.47	1970.85	3132.06	944.871	729.276	671.505	-1.51992	0.195501	7.77452	7.57359e-15	6.689e-13
AT5G56870	442.747	299.993	214.475	123.12	109.156	75.6479	-1.52148	0.317631	4.79008	1.66711e-06	4.16192e-05
AT5G04190	71.6033	31.5782	54.2974	17.1795	12.233	19.6892	-1.52911	0.364523	4.19482	2.73086e-05	0.000514872
AT3G55090	17.9008	18.5754	24.4338	0.954415	10.351	5.18136	-1.53542	0.49212	3.12002	0.0018084	0.0202687
AT3G10020	22.6744	38.0796	24.4338	5.72649	12.233	6.21763	-1.53835	0.4548	3.38248	0.000718351	0.00921567
AT2G22200	17.9008	39.0084	34.3884	4.77208	11.292	10.3627	-1.54052	0.440713	3.49552	0.000473132	0.00637861
AT5G22920	452.294	371.509	531.21	239.558	104.451	88.0832	-1.54495	0.32063	4.81848	1.44655e-06	3.67124e-05
AT5G61440	73.9901	36.2221	82.3511	12.4074	21.643	24.8705	-1.54735	0.347219	4.4564	8.33489e-06	0.000176767
AT2G30790	14.3207	22.2905	22.6239	3.81766	8.46901	4.14509	-1.54968	0.469806	3.29855	0.000971856	0.011921
AT1G75490	13.1273	20.433	23.5289	0.954415	5.64601	8.29018	-1.5542	0.498932	3.11504	0.00183918	0.0205673
AT3G23480	142.013	111.453	80.5412	40.0854	29.171	38.3421	-1.55591	0.265771	5.85433	4.78933e-09	1.84088e-07
AT4G36540	455.874	383.583	508.586	181.339	111.038	155.441	-1.56169	0.186354	8.38019	5.28424e-17	5.556e-15
AT5G54585	115.759	221.048	88.6858	52.4928	30.112	46.6323	-1.57671	0.340942	4.62456	3.75394e-06	8.67423e-05
AT4G26288	23.8678	32.507	26.2438	8.58974	6.58701	9.32645	-1.57864	0.362272	4.35761	1.31492e-05	0.000267727
AT1G29500	88.3107	75.2305	127.599	21.9515	40.4631	26.9431	-1.58238	0.319565	4.95168	7.3575e-07	1.94944e-05
AT3G56360	17.9008	91.0196	80.5412	12.4074	16.938	17.6166	-1.60554	0.477618	3.36155	0.000775069	0.0097916
AT5G22270	71.6033	61.2989	73.3015	22.906	22.584	15.5441	-1.60587	0.349101	4.60003	4.2244e-06	9.60494e-05
AT2G03750	269.706	251.697	251.578	82.0797	95.0411	71.5028	-1.60711	0.166615	9.64564	5.12921e-22	9.18268e-20
AT2G23770	91.8909	58.5126	115.835	29.5869	26.348	25.9068	-1.61349	0.29664	5.43921	5.35163e-08	1.75202e-06
AT1G22370	53.7025	50.1536	78.7313	10.4986	22.584	19.6892	-1.62349	0.371657	4.36824	1.25252e-05	0.000256863
AT3G48580	8.35372	19.5042	36.1983	3.81766	5.64601	6.21763	-1.62396	0.485113	3.34758	0.000815196	0.0102399
AT3G07730	20.2876	16.7179	26.2438	4.77208	4.70501	7.25391	-1.62622	0.449199	3.62026	0.000294303	0.00416849
AT1G53700	26.2545	14.8603	20.814	4.77208	1.882	8.29018	-1.63294	0.484108	3.37309	0.000743298	0.00947454
AT1G23060	26.2545	15.7891	20.814	3.81766	3.76401	7.25391	-1.64685	0.502376	3.27812	0.001045	0.0126933
AT4G32480	13.1273	26.0056	46.1528	5.72649	9.41001	7.25391	-1.66018	0.457853	3.62601	0.000287834	0.00409731
AT1G80440	418.879	253.555	197.281	39.131	131.74	69.4303	-1.6607	0.37532	4.42475	9.6552e-06	0.000201542
AT1G78270	99.0512	86.3757	92.3056	26.7236	28.23	29.0156	-1.66654	0.230723	7.22315	5.07976e-13	3.54193e-11
AT3G03820	97.8578	38.0796	17.1942	15.2706	6.58701	15.5441	-1.66853	0.445852	3.74235	0.000182308	0.0027761
AT2G32100	93.0843	90.0908	132.124	20.9971	47.0501	22.798	-1.67923	0.307642	5.45839	4.80467e-08	1.58339e-06
AT1G78265	102.631	85.447	87.7808	26.7236	29.171	25.9068	-1.68292	0.240323	7.00274	2.51e-12	1.54903e-10
AT3G53250	20.2876	11.1453	9.04957	1.90883	5.64601	0	-1.69781	0.533038	3.18516	0.00144676	0.0166958
AT2G35420	15.514	16.7179	16.2892	5.72649	1.882	3.10882	-1.70418	0.500918	3.40211	0.000668682	0.00863982
AT4G11290	73.9901	61.2989	65.1569	25.7692	11.292	17.6166	-1.70681	0.35676	4.7842	1.71667e-06	4.25813e-05
AT1G62030	70.4099	85.447	83.2561	24.8148	15.997	29.0156	-1.71797	0.240691	7.13766	9.49311e-13	6.33044e-11
AT1G43160	13.1273	106.809	4.52479	1.90883	9.41001	6.21763	-1.71884	0.599579	2.86674	0.00414719	0.0395763
AT4G21510	54.8958	24.1481	26.2438	6.68091	10.351	9.32645	-1.71942	0.408508	4.20903	2.56474e-05	0.000486787
AT1G19670	385.464	1524.11	466.958	267.236	114.802	253.887	-1.72755	0.353806	4.88277	1.04607e-06	2.72802e-05
AT3G23880	52.5091	52.94	39.8181	9.54415	17.879	11.399	-1.73089	0.336244	5.14771	2.63685e-07	7.67197e-06
AT1G09467	16.7074	25.0768	23.5289	8.58974	3.76401	3.10882	-1.73383	0.405428	4.27653	1.89831e-05	0.000371658
AT4G34790	29.8347	16.7179	17.1942	5.72649	4.70501	5.18136	-1.73458	0.437612	3.96375	7.37811e-05	0.00124569
AT4G38850	47.7355	38.0796	42.533	14.3162	9.41001	9.32645	-1.74927	0.359767	4.86222	1.16074e-06	2.99562e-05
AT2G36050	112.178	132.814	194.566	58.2193	37.6401	24.8705	-1.7566	0.307034	5.72118	1.05785e-08	3.85716e-07
AT4G14620	101.438	99.3785	90.4957	39.131	16.938	24.8705	-1.76466	0.258421	6.82862	8.57354e-12	4.86781e-10
AT1G73830	102.631	76.1592	63.347	11.453	32.935	19.6892	-1.76582	0.321865	5.48621	4.10646e-08	1.36919e-06
AT2G44740	138.433	122.598	127.599	33.4045	35.7581	39.3784	-1.7671	0.251998	7.01235	2.34347e-12	1.4553e-10
AT5G54075	2217.31	144.888	16.2892	9.54415	87.5131	94.3008	-1.76911	0.601143	2.94291	0.00325141	0.0327813
AT2G21200	38.1884	16.7179	20.814	3.81766	8.46901	4.14509	-1.79509	0.465201	3.85873	0.000113976	0.00183841
AT1G49130	51.3157	117.954	95.9255	25.7692	21.643	21.7617	-1.82329	0.313138	5.82265	5.79229e-09	2.18414e-07
AT5G47330	16.7074	195.042	31.6735	15.2706	17.879	17.6166	-1.82979	0.489987	3.73436	0.000188194	0.00285698
AT1G26800	57.2826	56.655	47.0578	15.2706	16.938	9.32645	-1.832	0.299207	6.12286	9.19106e-10	4.02301e-08
AT3G15630	223.164	233.122	247.053	87.8062	37.6401	62.1763	-1.83744	0.246427	7.45632	8.89723e-14	6.74831e-12
AT3G26445	19.0942	21.3617	13.5744	2.86325	4.70501	3.10882	-1.83775	0.47845	3.84105	0.000122511	0.00195075
AT4G38860	570.439	404.944	363.793	160.342	98.8051	97.4096	-1.84615	0.221264	8.34366	7.20281e-17	7.53338e-15
AT2G33480	42.962	61.2989	45.2479	17.1795	15.997	3.10882	-1.85176	0.341312	5.42542	5.78182e-08	1.87739e-06
AT5G39860	115.759	129.099	160.177	41.9943	18.82	43.5234	-1.85217	0.300925	6.15493	7.51123e-10	3.34671e-08
AT1G29435	105.018	64.0852	59.7272	20.9971	23.525	10.3627	-1.87314	0.326155	5.74309	9.29635e-09	3.42741e-07
AT3G30180	241.064	249.839	257.913	62.9914	73.3981	62.1763	-1.88872	0.147409	12.8128	1.39017e-37	5.87775e-35
AT3G03850	54.8958	26.9344	32.5785	11.453	4.70501	9.32645	-1.89005	0.381055	4.96005	7.04768e-07	1.87988e-05
AT1G75960	63.2496	75.2305	88.6858	15.2706	16.938	20.7254	-1.8926	0.382202	4.95183	7.35202e-07	1.94944e-05
AT1G29440	101.438	62.2277	57.0123	19.0883	22.584	9.32645	-1.9286	0.31548	6.1132	9.76525e-10	4.24628e-08
AT5G02760	325.795	259.127	435.284	85.8974	74.3391	81.8655	-1.94127	0.304889	6.36714	1.92589e-10	9.02626e-09
AT5G46105	8.35372	13.0028	14.4793	0.954415	2.823	2.07254	-1.95087	0.496993	3.92534	8.66073e-05	0.00144022
AT5G67420	484.516	347.36	428.045	98.3047	121.389	94.3008	-1.95094	0.202963	9.61229	7.09554e-22	1.25895e-19
AT3G18217	15.514	16.7179	16.2892	3.81766	1.882	3.10882	-1.9891	0.473775	4.19841	2.68797e-05	0.000508233
AT3G08595	9.5471	8.35894	12.6694	0	0.941001	2.07254	-1.99405	0.559405	3.56459	0.000364428	0.00504663
AT5G18080	72.7967	69.6578	89.5908	12.4074	25.407	13.4715	-2.03411	0.306336	6.64015	3.13362e-11	1.61325e-09
AT2G18560	42.962	41.7947	48.8677	11.453	5.64601	10.3627	-2.05784	0.36495	5.6387	1.71342e-08	6.06936e-07
AT1G80920	1170.71	1119.17	742.97	286.325	223.958	195.856	-2.05927	0.181023	11.3757	5.5243e-30	1.74252e-27
AT3G29035	95.471	58.5126	19.0041	12.4074	6.58701	12.4353	-2.06503	0.428661	4.8174	1.45439e-06	3.68643e-05
AT5G19120	167.074	247.053	154.748	62.9914	26.348	32.1244	-2.06844	0.32452	6.37385	1.84339e-10	8.68052e-09
AT3G61460	187.362	177.395	311.305	48.6752	58.3421	44.5597	-2.08088	0.235135	8.84973	8.77329e-19	1.17009e-16
AT4G10910	21.481	20.433	23.5289	2.86325	5.64601	2.07254	-2.08385	0.483487	4.31005	1.6322e-05	0.000323381
AT5G03230	125.306	104.022	81.4461	20.9971	20.702	25.9068	-2.09587	0.274868	7.62502	2.43999e-14	2.03729e-12
AT3G03830	21.481	16.7179	12.6694	1.90883	0.941001	4.14509	-2.10034	0.514053	4.08585	4.39152e-05	0.000784082
AT5G00875	70.4099	64.0852	92.3056	13.3618	10.351	19.6892	-2.1245	0.380437	5.58437	2.34544e-08	8.11997e-07
AT4G28240	280.446	264.7	223.524	56.3105	71.5161	40.4146	-2.12561	0.201152	10.5671	4.23216e-26	9.8943e-24
AT5G18030	125.306	75.2305	114.93	14.3162	17.879	29.0156	-2.19419	0.321149	6.83231	8.35595e-12	4.77153e-10
AT3G15635	161.107	130.028	164.702	39.131	14.115	37.3058	-2.19656	0.300758	7.30342	2.80546e-13	2.01993e-11
AT3G09275	1219.64	1088.52	672.383	166.068	197.61	237.306	-2.20207	0.253014	8.70337	3.22183e-18	3.90392e-16
AT1G30250	39.3818	145.817	77.8263	15.2706	15.056	9.32645	-2.20266	0.461587	4.77193	1.82472e-06	4.48217e-05
AT5G18010	21.481	23.2193	18.0991	2.86325	3.76401	3.10882	-2.22358	0.447034	4.97407	6.5561e-07	1.75347e-05
AT1G29430	85.9239	70.5866	91.4007	19.0883	15.997	11.399	-2.22491	0.309511	7.18845	6.55287e-13	4.45954e-11
AT5G39610	109.792	53.8687	18.0991	6.68091	7.52801	11.399	-2.22494	0.48063	4.62922	3.67052e-06	8.49134e-05
AT3G59940	1300.79	1198.11	740.255	179.43	212.666	249.742	-2.22715	0.252021	8.83714	9.8197e-19	1.2838e-16
AT5G56550	71.6033	88.2333	73.3015	19.0883	6.58701	17.6166	-2.27097	0.304469	7.4588	8.73131e-14	6.67341e-12
AT1G56150	53.7025	33.4358	35.2933	5.72649	7.52801	6.21763	-2.27842	0.382933	5.94992	2.68269e-09	1.09019e-07
AT5G18020	83.5372	85.447	126.694	20.9971	16.938	16.5804	-2.30257	0.290929	7.91455	2.48139e-15	2.37069e-13
AT3G18775	48.9289	55.7263	73.3015	14.3162	4.70501	9.32645	-2.36619	0.382048	6.19343	5.88671e-10	2.64065e-08
AT4G26290	13.1273	9.28771	12.6694	0	0.941001	1.03627	-2.38901	0.563212	4.24176	2.21776e-05	0.00042581
AT3G07350	50.1223	52.0112	75.1114	7.63532	15.056	4.14509	-2.40305	0.399294	6.01825	1.76313e-09	7.40739e-08
AT1G29460	66.8297	41.7947	50.6776	9.54415	5.64601	9.32645	-2.4061	0.356812	6.74332	1.54804e-11	8.29807e-10
AT1G15125	206.456	121.669	143.888	34.3589	15.997	23.8343	-2.44026	0.356857	6.83819	8.02024e-12	4.61966e-10
AT3G61898	5.96694	14.8603	15.3843	0.954415	0	1.03627	-2.45907	0.540698	4.54795	5.417e-06	0.000120007
AT5G46690	128.886	153.247	256.103	24.8148	30.112	33.1607	-2.47357	0.281906	8.77445	1.71745e-18	2.16007e-16
AT5G18060	52.5091	39.0084	45.2479	6.68091	10.351	1.03627	-2.47999	0.424638	5.84024	5.21241e-09	1.98194e-07
AT4G34770	31.0281	20.433	35.2933	3.81766	3.76401	2.07254	-2.48241	0.493679	5.02839	4.94625e-07	1.36327e-05
AT3G18773	48.9289	57.5838	77.8263	13.3618	2.823	9.32645	-2.48494	0.40895	6.07638	1.22928e-09	5.25338e-08
AT5G18050	57.2826	30.6495	66.9668	4.77208	9.41001	6.21763	-2.52774	0.422377	5.98456	2.16978e-09	9.01845e-08
AT1G14200	68.0231	53.8687	39.8181	3.81766	10.351	6.21763	-2.62898	0.381052	6.89929	5.22641e-12	3.09105e-10
AT3G26512	64.443	66.8715	116.739	12.4074	9.41001	9.32645	-2.63018	0.400837	6.56171	5.31957e-11	2.68301e-09
AT4G32280	130.079	147.675	192.756	30.5413	15.997	18.6529	-2.64116	0.326601	8.0868	6.12523e-16	6.11662e-14
AT3G26510	149.174	150.461	202.71	22.906	20.702	23.8343	-2.71332	0.300896	9.01746	1.92496e-19	2.752e-17
AT4G38825	20.2876	24.1481	27.1487	1.90883	2.823	0	-2.83048	0.531043	5.33004	9.81915e-08	3.04884e-06
AT4G38840	355.63	328.785	299.541	61.0826	29.171	37.3058	-2.87243	0.18425	15.5898	8.53879e-55	7.07012e-52
AT4G38820	21.481	20.433	26.2438	0.954415	2.823	0	-2.89396	0.537955	5.37955	7.46709e-08	2.3516e-06
AT2G44130	378.304	253.555	197.281	30.5413	28.23	36.2695	-2.93906	0.281903	10.4258	1.89048e-25	4.26905e-23
AT1G23390	1232.77	970.566	1003.6	124.074	111.038	118.135	-3.07277	0.228557	13.4442	3.32856e-41	1.6133e-38
AT2G20670	217.197	336.215	385.512	32.4501	24.466	25.9068	-3.14187	0.373201	8.41872	3.8061e-17	4.11059e-15
AT5G07010	60.8628	570.266	103.165	10.4986	15.997	16.5804	-3.2163	0.501531	6.41296	1.42725e-10	6.8015e-09
6 h
	Normalized read count
Gene	Control 6 h replicate 1	Control 6 h replicate 2	Control 6 h replicate 3	Cold 6 h replicate 1	Cold 6 h replicate 2	Cold 6 h replicate 3	log2FC	Standard error	wald statistics	p-value	q-value
AT5G03230	98.5828	74.6244	81.4609	3.39807	1.25168	1.87963	-4.19309	0.396431	10.5771	3.80529e-26	3.97992e-24
AT3G06365	34218.4	86479.9	102.545	411.167	132.678	119.357	-4.05377	0.602377	6.72962	1.70105e-11	4.60745e-10
AT5G46690	183.684	204.329	207.006	5.66346	7.51009	15.9769	-3.8913	0.325649	11.9494	6.54206e-33	1.0798e-30
AT1G73830	79.2033	87.0618	95.8363	4.53077	0	5.6389	-3.78099	0.39738	9.51479	1.82076e-21	1.345e-19
AT1G23390	449.1	619.205	730.273	39.6442	51.3189	35.713	-3.64025	0.248433	14.6529	1.29176e-48	4.70536e-46
AT4G34790	20.2221	33.7587	26.8342	0	0	0.939816	-3.61946	0.505123	7.1655	7.7504e-13	2.4586e-11
AT1G14200	44.6572	45.3077	62.2936	1.13269	2.50336	3.75926	-3.43416	0.431086	7.96629	1.63504e-15	6.9504e-14
AT2G33480	43.8146	43.5309	47.9182	1.13269	1.25168	2.81945	-3.42694	0.428827	7.99144	1.33377e-15	5.73027e-14
AT3G26510	118.805	110.16	195.506	2.26538	12.5168	15.0371	-3.41725	0.336486	10.1557	3.12517e-24	2.89586e-22
AT3G41768	5218.99	19284.2	24.9174	97.4115	21.2786	31.0139	-3.38194	0.601781	5.61989	1.91082e-08	3.50738e-07
AT1G22370	99.4254	77.2896	106.378	3.39807	10.0134	6.57871	-3.32416	0.405726	8.19312	2.54538e-16	1.15897e-14
AT3G26512	51.3979	44.4193	92.9612	1.13269	6.2584	4.69908	-3.18651	0.43826	7.27081	3.5734e-13	1.18517e-11
AT2G44130	192.11	194.557	207.006	13.5923	22.5303	22.5556	-3.0723	0.300817	10.2132	1.73074e-24	1.62512e-22
AT5G22270	76.6755	86.1734	69.0022	9.06153	5.00672	6.57871	-3.01253	0.390025	7.72395	1.12779e-14	4.37992e-13
AT4G01460	67.4071	104.83	108.295	5.66346	12.5168	9.39816	-2.9877	0.326126	9.16117	5.13385e-20	3.35798e-18
AT5G19120	98.5828	127.039	144.713	10.1942	16.2719	9.39816	-2.98629	0.36019	8.29087	1.12419e-16	5.33726e-15
AT1G26800	55.6108	48.8612	39.2929	4.53077	6.2584	2.81945	-2.97399	0.373514	7.9622	1.69009e-15	7.15561e-14
AT5G15537	33.7035	29.3167	38.3345	2.26538	5.00672	0.939816	-2.96056	0.41421	7.14749	8.8382e-13	2.7622e-11
AT1G80920	829.107	812.873	864.444	90.6153	107.645	105.259	-2.95558	0.191943	15.3982	1.68276e-53	8.26784e-51
AT2G38820	53.0831	71.0709	61.3353	1.13269	7.51009	9.39816	-2.89215	0.37166	7.78171	7.1552e-15	2.82557e-13
AT5G50335	69.0922	53.3032	53.6683	3.39807	0	9.39816	-2.88173	0.472527	6.09855	1.07035e-09	2.34577e-08
AT4G14620	89.3144	95.0573	96.7947	4.53077	11.2651	15.9769	-2.84678	0.30494	9.33552	1.00501e-20	7.00753e-19
AT5G22920	258.675	278.065	366.095	26.0519	50.0672	27.2547	-2.84378	0.337022	8.43796	3.22918e-17	1.63604e-15
AT1G72910	51.3979	37.3122	70.9189	0	3.75504	8.45834	-2.83936	0.460639	6.16396	7.09475e-10	1.58615e-08
AT3G53250	27.8054	15.1026	38.3345	3.39807	2.50336	0	-2.80774	0.534984	5.24827	1.53536e-07	2.46113e-06
AT2G36050	63.1941	87.0618	139.921	10.1942	10.0134	12.2176	-2.79243	0.350889	7.95817	1.74608e-15	7.3779e-14
AT5G56550	76.6755	71.9593	66.1271	6.79615	10.0134	8.45834	-2.77581	0.337666	8.22058	2.02522e-16	9.34212e-15
AT2G20670	74.1478	82.6199	175.38	10.1942	13.7685	10.338	-2.77117	0.396933	6.98146	2.92126e-12	8.65604e-11
AT1G30250	116.277	87.9502	232.882	5.66346	7.51009	28.1945	-2.76265	0.461711	5.9835	2.18386e-09	4.57723e-08
AT2G05160	42.972	81.7315	54.6267	10.1942	5.00672	5.6389	-2.76061	0.362098	7.62392	2.46081e-14	9.18545e-13
AT1G15125	167.675	136.811	116.92	7.92884	11.2651	31.0139	-2.73352	0.369353	7.40083	1.35336e-13	4.71822e-12
AT5G39860	68.2497	47.9728	43.1263	4.53077	6.2584	5.6389	-2.72371	0.37917	7.18334	6.80267e-13	2.171e-11
AT3G23480	91.8421	135.035	100.628	13.5923	20.0269	10.338	-2.7091	0.303164	8.93609	4.03191e-19	2.44075e-17
AT2G18050	41.2868	31.0935	19.1673	1.13269	6.2584	0.939816	-2.68733	0.493662	5.44367	5.21942e-08	9.05579e-07
AT5G39610	87.6292	76.4012	32.5844	3.39807	8.76177	5.6389	-2.68091	0.489727	5.47429	4.39271e-08	7.68888e-07
AT2G20180	103.638	95.0573	107.337	10.1942	8.76177	20.6759	-2.67743	0.266176	10.0589	8.39513e-24	7.5474e-22
AT4G31405	16.0092	10.6606	30.6676	0	1.25168	0.939816	-2.67392	0.545628	4.90063	9.55321e-07	1.32002e-05
AT4G28270	36.2313	37.3122	38.3345	5.66346	1.25168	4.69908	-2.6512	0.401829	6.59785	4.17176e-11	1.07879e-09
AT4G36540	353.045	363.35	330.635	36.2461	62.584	56.389	-2.6495	0.20818	12.727	4.18728e-37	8.84646e-35
AT2G44740	80.8885	129.704	126.504	20.3884	20.0269	9.39816	-2.59912	0.287102	9.05293	1.39181e-19	8.80383e-18
AT5G10550	247.721	282.507	390.054	39.6442	52.5706	50.7501	-2.59311	0.195692	13.251	4.45392e-40	1.13371e-37
AT2G23770	56.4534	66.6289	50.7933	6.79615	3.75504	11.2778	-2.58402	0.357858	7.22079	5.16863e-13	1.68775e-11
AT4G34770	19.3795	7.99547	21.084	0	1.25168	0.939816	-2.58014	0.531245	4.85678	1.1931e-06	1.61892e-05
AT3G29035	85.1014	61.2986	44.0847	7.92884	6.2584	7.51853	-2.58007	0.441058	5.84973	4.92386e-09	9.77691e-08
AT3G30180	254.462	242.529	268.342	33.9807	42.5572	45.1112	-2.57152	0.169249	15.1938	3.88965e-52	1.74844e-49
AT1G07187	10.9536	15.9909	13.4171	1.13269	0	0	-2.54057	0.582542	4.36118	1.2936e-05	0.000142715
AT1G59590	33.7035	23.098	9.58363	3.39807	0	1.87963	-2.5221	0.498582	5.05854	4.2247e-07	6.23291e-06
AT4G02075	71.62	62.187	74.7523	13.5923	7.51009	9.39816	-2.50892	0.330671	7.58736	3.26492e-14	1.21014e-12
AT3G22460	28.648	19.5445	15.3338	2.26538	3.75504	0.939816	-2.49577	0.485778	5.13768	2.78158e-07	4.28326e-06
AT2G28160	10.1111	10.6606	12.4587	1.13269	0	0	-2.49314	0.537236	4.64069	3.47256e-06	4.29429e-05
AT2G25200	53.0831	54.1915	70.9189	10.1942	8.76177	8.45834	-2.48236	0.318053	7.80485	5.95746e-15	2.37927e-13
AT4G29310	86.7866	123.486	92.9612	15.8577	18.7752	14.0972	-2.4718	0.268185	9.21677	3.06178e-20	2.05353e-18
AT5G07015	111.222	110.16	148.546	23.7865	13.7685	22.5556	-2.44383	0.26963	9.06362	1.26188e-19	8.00593e-18
AT3G48360	275.526	600.549	820.359	67.9615	133.93	58.2686	-2.41093	0.379573	6.3517	2.12955e-10	5.07799e-09
AT3G23880	40.4442	47.9728	58.4602	5.66346	10.0134	6.57871	-2.39954	0.36756	6.52828	6.65291e-11	1.68895e-09
AT3G26932	70.7774	88.8386	98.7114	6.79615	20.0269	15.0371	-2.39909	0.304522	7.87824	3.3202e-15	1.36205e-13
AT1G56150	50.5553	50.638	70.9189	2.26538	8.76177	15.0371	-2.38837	0.370736	6.44222	1.17736e-10	2.89907e-09
AT4G14270	339.563	348.247	315.302	60.0326	58.829	62.0278	-2.38121	0.221661	10.7425	6.42501e-27	6.99697e-25
AT1G72275	21.0647	18.6561	25.8758	2.26538	1.25168	3.75926	-2.36999	0.45806	5.17397	2.29177e-07	3.58388e-06
AT2G26515	10.1111	7.10709	13.4171	1.13269	0	0	-2.36698	0.562065	4.21123	2.53989e-05	0.00026163
AT5G56100	39.6017	59.5219	79.5442	7.92884	7.51009	11.2778	-2.34378	0.377945	6.20138	5.59695e-10	1.26738e-08
AT5G47640	214.017	238.976	277.925	45.3077	37.5504	51.6899	-2.33646	0.214165	10.9096	1.03689e-27	1.2307e-25
AT1G28330	940.329	936.359	1440.42	182.363	244.078	183.264	-2.32429	0.256976	9.04478	1.4996e-19	9.4292e-18
AT4G34760	139.87	120.82	177.297	29.45	22.5303	27.2547	-2.32311	0.246518	9.42367	4.35587e-21	3.14084e-19
AT5G07010	192.11	68.4057	208.923	16.9904	20.0269	24.4352	-2.32249	0.500981	4.63588	3.55424e-06	4.38232e-05
AT3G26740	3270.93	3144	3517.19	577.673	618.33	703.922	-2.31085	0.19601	11.7895	4.42309e-32	6.92197e-30
AT1G23052	16.0092	14.2142	40.2513	3.39807	0	2.81945	-2.30753	0.531502	4.34154	1.41491e-05	0.000155045
AT5G61440	81.7311	108.383	156.213	19.2558	17.5235	22.5556	-2.30568	0.345627	6.671	2.54061e-11	6.77721e-10
AT4G04865	13.4814	6.2187	20.1256	0	0	2.81945	-2.30446	0.543059	4.24348	2.20084e-05	0.000230755
AT5G18010	23.5925	18.6561	14.3754	3.39807	2.50336	1.87963	-2.29958	0.466	4.93472	8.02661e-07	1.13086e-05
AT4G14820	10.1111	15.1026	13.4171	0	1.25168	0.939816	-2.29764	0.51829	4.43311	9.28824e-06	0.000105786
AT5G45310	22.7499	10.6606	16.2922	2.26538	1.25168	1.87963	-2.29056	0.485556	4.7174	2.3888e-06	3.04944e-05
AT1G14920	256.147	253.19	328.719	35.1134	68.8424	53.5695	-2.28824	0.248234	9.2181	3.02421e-20	2.03479e-18
AT5G19190	170.203	233.645	409.221	36.2461	61.3324	46.9908	-2.28798	0.306949	7.45394	9.05942e-14	3.22219e-12
AT3G56400	308.387	214.989	245.341	14.725	28.7887	86.4631	-2.28602	0.356794	6.40711	1.48306e-10	3.5973e-09
AT2G23430	43.8146	34.647	29.7093	6.79615	2.50336	5.6389	-2.28447	0.414269	5.51445	3.49881e-08	6.22217e-07
AT5G25130	28.648	56.8567	37.3762	10.1942	5.00672	3.75926	-2.28423	0.385278	5.92879	3.05182e-09	6.27807e-08
AT4G14400	1130.75	1182.44	814.609	117.8	107.645	328.936	-2.28166	0.328945	6.9363	4.02498e-12	1.17291e-10
AT2G25900	210.647	246.083	272.175	39.6442	52.5706	45.1112	-2.27932	0.245455	9.2861	1.60045e-20	1.10499e-18
AT2G03550	128.916	167.017	169.63	31.7154	30.0403	29.1343	-2.26271	0.210231	10.763	5.14729e-27	5.69354e-25
AT4G38825	8.42588	12.4374	12.4587	1.13269	0	0.939816	-2.25252	0.553742	4.06781	4.74569e-05	0.000463533
AT4G38840	208.962	214.101	172.505	28.3173	50.0672	40.4121	-2.2473	0.194113	11.5773	5.37363e-31	8.10919e-29
AT2G32100	37.9165	59.5219	75.7107	6.79615	11.2651	11.2778	-2.22495	0.354384	6.27836	3.42153e-10	8.04079e-09
AT4G38820	7.5833	12.4374	12.4587	1.13269	0	0.939816	-2.22282	0.556407	3.99496	6.4706e-05	0.000612201
AT1G69490	47.1849	33.7587	12.4587	4.53077	3.75504	3.75926	-2.21678	0.470367	4.71288	2.44239e-06	3.1122e-05
AT2G40610	365.683	336.698	293.259	92.8807	67.5908	42.2917	-2.20295	0.235974	9.33557	1.00448e-20	7.00753e-19
AT3G52480	16.8518	21.3213	22.0424	2.26538	1.25168	4.69908	-2.20088	0.441674	4.98305	6.25891e-07	8.98926e-06
AT5G64190	21.9073	18.6561	23.0007	3.39807	3.75504	1.87963	-2.19565	0.443864	4.94667	7.54949e-07	1.06893e-05
AT5G23410	23.5925	23.9864	23.0007	4.53077	3.75504	2.81945	-2.18683	0.417512	5.23778	1.62521e-07	2.59726e-06
AT3G63210	169.36	127.039	118.837	18.1231	36.2987	29.1343	-2.18064	0.272442	8.00405	1.20391e-15	5.21211e-14
AT3G18775	36.2313	32.8703	57.5018	12.4596	2.50336	6.57871	-2.18046	0.401554	5.43006	5.63343e-08	9.74754e-07
AT1G80650	63.1941	77.2896	62.2936	7.92884	15.0202	15.9769	-2.18025	0.304662	7.15629	8.28896e-13	2.61374e-11
AT2G03750	137.342	158.133	146.63	28.3173	32.5437	30.0741	-2.18008	0.207242	10.5195	7.02727e-26	7.06977e-24
AT4G35770	185.369	245.194	350.761	44.175	42.5572	46.9908	-2.1788	0.413695	5.26669	1.38902e-07	2.24014e-06
AT1G72510	205.592	180.342	209.882	47.573	43.8088	32.8936	-2.17524	0.21903	9.93125	3.04426e-23	2.58297e-21
AT1G52750	38.7591	45.3077	63.252	5.66346	15.0202	5.6389	-2.16617	0.39264	5.51693	3.44977e-08	6.1453e-07
AT2G45450	37.9165	51.5264	44.0847	4.53077	11.2651	9.39816	-2.16518	0.33363	6.48978	8.59617e-11	2.14925e-09
AT3G07350	20.2221	20.4329	45.0431	5.66346	3.75504	3.75926	-2.16347	0.439991	4.91708	8.78435e-07	1.22743e-05
AT3G02170	309.23	266.516	393.887	57.7673	80.1076	59.2084	-2.15871	0.27315	7.90304	2.72191e-15	1.12757e-13
AT1G49130	58.1386	67.5173	92.9612	15.8577	11.2651	15.0371	-2.15489	0.336179	6.40995	1.4557e-10	3.54316e-09
AT5G45100	110.379	126.151	118.837	15.8577	31.292	26.3148	-2.15279	0.249578	8.62572	6.36912e-18	3.47701e-16
AT1G23050	16.0092	13.3258	39.2929	3.39807	0	3.75926	-2.1468	0.535635	4.00796	6.12459e-05	0.000582594
AT5G44973	5.89812	13.3258	9.58363	0	1.25168	0.939816	-2.14453	0.585897	3.66025	0.000251966	0.00205453
AT3G15635	113.749	123.486	187.839	22.6538	40.0538	24.4352	-2.14131	0.305305	7.01366	2.32159e-12	6.93751e-11
AT3G28857	10.9536	3.55354	11.5004	0	1.25168	0	-2.1413	0.575833	3.71862	0.000200316	0.00167474
AT5G21940	297.434	341.14	526.141	56.6346	88.8693	96.801	-2.13173	0.272513	7.82251	5.17809e-15	2.07585e-13
AT3G15630	215.703	262.074	366.095	56.6346	75.1009	48.8704	-2.13055	0.248344	8.57901	9.56901e-18	5.1837e-16
AT3G19850	179.471	209.659	219.465	33.9807	65.0874	32.8936	-2.12922	0.225708	9.43353	3.96516e-21	2.87876e-19
AT1G07743	12.6388	5.33032	4.79182	0	0	0	-2.11791	0.572581	3.69889	0.000216546	0.0017927
AT2G19660	16.0092	15.9909	19.1673	1.13269	3.75504	1.87963	-2.11166	0.507557	4.16043	3.17648e-05	0.000319113
AT4G01200	15.1666	18.6561	9.58363	1.13269	2.50336	1.87963	-2.1101	0.530337	3.97879	6.92672e-05	0.000652348
AT4G24050	30.3332	30.2051	77.6274	7.92884	11.2651	6.57871	-2.10137	0.378558	5.55099	2.84063e-08	5.11629e-07
AT5G47440	20.2221	21.3213	30.6676	5.66346	1.25168	4.69908	-2.09594	0.436649	4.80004	1.5863e-06	2.09986e-05
AT1G75380	1940.48	1830.07	1799.81	400.973	474.387	379.686	-2.09007	0.181758	11.4992	1.33213e-30	1.92766e-28
AT2G08655	6.74071	5.33032	6.70854	0	0	0	-2.08393	0.582498	3.57757	0.000346801	0.0027111
AT1G76870	27.8054	17.7677	11.5004	1.13269	5.00672	2.81945	-2.0838	0.46133	4.51694	6.27407e-06	7.43006e-05
AT2G26110	126.388	146.584	112.129	44.175	21.2786	19.7361	-2.07238	0.245151	8.45346	2.82784e-17	1.45362e-15
AT4G37610	32.0184	55.9683	85.2943	7.92884	8.76177	15.9769	-2.07028	0.375101	5.51927	3.4042e-08	6.06924e-07
AT1G27210	187.055	239.864	228.09	45.3077	62.584	41.3519	-2.06756	0.202484	10.211	1.77058e-24	1.65518e-22
AT3G58120	247.721	319.819	322.968	49.8384	86.366	61.088	-2.0661	0.246999	8.3648	6.02182e-17	2.92467e-15
AT5G18060	25.2777	28.4283	19.1673	6.79615	2.50336	2.81945	-2.05322	0.453301	4.52949	5.91267e-06	7.03758e-05
AT2G29300	16.8518	16.8793	30.6676	2.26538	6.2584	2.81945	-2.04974	0.443359	4.62321	3.77849e-06	4.64388e-05
AT2G37130	243.508	248.748	114.045	45.3077	56.3256	22.5556	-2.04729	0.385958	5.30443	1.13028e-07	1.85977e-06
AT3G25970	8.42588	9.77224	6.70854	1.13269	0	0	-2.03971	0.558683	3.65093	0.000261295	0.00212404
AT4G04630	50.5553	70.1825	70.9189	12.4596	11.2651	16.9167	-2.03294	0.310464	6.5481	5.82756e-11	1.48694e-09
AT5G56870	262.045	353.578	233.841	44.175	41.3055	96.801	-2.03176	0.323689	6.27688	3.45442e-10	8.10905e-09
AT5G46105	8.42588	7.10709	6.70854	0	0	0.939816	-2.03112	0.53793	3.77581	0.000159489	0.00137028
AT5G42440	16.0092	11.549	24.9174	0	3.75504	3.75926	-2.03013	0.501968	4.04433	5.24725e-05	0.000508293
AT4G21510	23.5925	17.7677	30.6676	5.66346	2.50336	3.75926	-2.02878	0.447619	4.53239	5.83195e-06	6.95718e-05
AT4G26290	5.05553	6.2187	7.66691	0	0	0	-2.02548	0.576953	3.51065	0.000447006	0.00337885
AT5G23050	131.444	116.379	134.171	27.1846	22.5303	33.8334	-2.02166	0.30419	6.64604	3.01077e-11	7.92137e-10
AT3G20830	26.9628	26.6516	28.7509	3.39807	1.25168	9.39816	-2.01904	0.419857	4.80888	1.51782e-06	2.01679e-05
AT3G18773	33.7035	32.8703	55.5851	14.725	6.2584	2.81945	-2.01351	0.420567	4.7876	1.68787e-06	2.22317e-05
AT1G54050	37.0739	21.3213	27.7925	2.26538	5.00672	7.51853	-2.01243	0.424614	4.73944	2.14306e-06	2.76413e-05
AT1G56220	1257.98	1225.08	1447.13	353.4	272.866	300.741	-2.00643	0.209606	9.57238	1.04469e-21	7.82662e-20
AT5G49450	44.6572	42.6425	56.5434	7.92884	12.5168	10.338	-2.00412	0.338393	5.92247	3.17145e-09	6.50516e-08
AT2G24550	59.8238	79.0663	92.9612	13.5923	26.2853	11.2778	-2.00238	0.327522	6.11373	9.73301e-10	2.14644e-08
AT3G61950	25.2777	35.5354	39.2929	1.13269	3.75504	11.2778	-2.00132	0.473468	4.22694	2.36889e-05	0.000246419
AT3G07730	15.1666	14.2142	11.5004	1.13269	3.75504	0.939816	-2.00112	0.498469	4.01454	5.95623e-05	0.000568885
AT2G00600	10.9536	15.1026	11.5004	1.13269	1.25168	1.87963	-1.99936	0.525836	3.80226	0.000143383	0.00124303
AT4G04845	29.4906	22.2096	41.2096	6.79615	3.75504	7.51853	-1.99672	0.401811	4.9693	6.71943e-07	9.59847e-06
AT4G01335	8.42588	11.549	5.75018	1.13269	1.25168	0	-1.98817	0.576306	3.44985	0.000560901	0.00408908
AT3G59330	19.3795	19.5445	17.2505	2.26538	2.50336	4.69908	-1.98504	0.444926	4.46151	8.1384e-06	9.39562e-05
AT3G61898	13.4814	10.6606	9.58363	1.13269	2.50336	0.939816	-1.98	0.536123	3.69319	0.000221457	0.00182763
AT4G17250	41.2868	41.7541	57.5018	12.4596	3.75504	13.1574	-1.96692	0.334873	5.87364	4.26322e-09	8.56806e-08
AT4G19660	177.786	161.686	133.212	23.7865	38.8021	49.8102	-1.96646	0.22625	8.69157	3.57479e-18	1.98227e-16
AT3G09780	27.8054	33.7587	31.626	4.53077	10.0134	3.75926	-1.96242	0.439282	4.46733	7.92028e-06	9.17893e-05
AT2G34180	16.0092	11.549	11.5004	3.39807	1.25168	0.939816	-1.96007	0.499078	3.92737	8.58801e-05	0.000789895
AT1G04310	34.5461	44.4193	46.9598	10.1942	8.76177	8.45834	-1.95972	0.341523	5.73818	9.57011e-09	1.81823e-07
AT2G41870	108.694	64.8522	76.6691	20.3884	11.2651	24.4352	-1.95564	0.307631	6.35709	2.05614e-10	4.91404e-09
AT3G22970	617.617	613.875	477.265	116.667	151.453	153.19	-1.95375	0.192765	10.1354	3.84862e-24	3.53521e-22
AT3G26240	56.4534	81.7315	93.9196	16.9904	15.0202	21.6158	-1.94146	0.276489	7.02182	2.19004e-12	6.55369e-11
AT1G17400	4.21294	6.2187	6.70854	0	0	0	-1.93352	0.587409	3.2916	0.000996188	0.00667295
AT2G06002	10.9536	8.88386	5.75018	2.26538	0	0	-1.93289	0.560096	3.451	0.000558513	0.00407589
AT1G68110	23.5925	27.54	14.3754	3.39807	2.50336	6.57871	-1.93048	0.440535	4.38213	1.17525e-05	0.000131303
AT2G01420	435.618	467.291	463.848	90.6153	136.433	120.296	-1.92989	0.153053	12.6093	1.87608e-36	3.88588e-34
AT3G50890	23.5925	26.6516	32.5844	2.26538	5.00672	9.39816	-1.92923	0.404735	4.76666	1.87304e-06	2.44421e-05
AT1G11440	50.5553	36.4238	61.3353	14.725	8.76177	10.338	-1.92724	0.317156	6.07665	1.22721e-09	2.66193e-08
AT5G67420	247.721	286.06	260.675	44.175	67.5908	84.5834	-1.92629	0.214567	8.97758	2.76777e-19	1.7048e-17
AT1G05023	5.89812	5.33032	15.3338	1.13269	1.25168	0	-1.92575	0.551352	3.49277	0.000478038	0.00358012
AT2G18560	22.7499	24.8748	29.7093	2.26538	8.76177	4.69908	-1.9208	0.406222	4.72845	2.26244e-06	2.89864e-05
AT1G62030	65.7219	54.1915	52.71	10.1942	11.2651	18.7963	-1.91128	0.277551	6.88622	5.7293e-12	1.64015e-10
AT4G32280	91.8421	79.0663	135.129	12.4596	31.292	28.1945	-1.90981	0.329852	5.78991	7.04261e-09	1.36379e-07
AT4G14819	4.21294	5.33032	5.75018	0	0	0	-1.89913	0.585552	3.24332	0.00118147	0.00772785
AT5G10650	69.9348	54.1915	38.3345	12.4596	11.2651	14.0972	-1.89568	0.324398	5.84369	5.10561e-09	1.01093e-07
AT4G29140	46.3424	63.0754	76.6691	10.1942	15.0202	18.7963	-1.88956	0.297565	6.35007	2.15211e-10	5.126e-09
AT5G41920	61.5089	81.7315	69.0022	16.9904	15.0202	20.6759	-1.87351	0.271911	6.89016	5.57291e-12	1.59754e-10
AT1G01180	52.2405	38.2006	61.3353	20.3884	7.51009	8.45834	-1.8718	0.318734	5.87259	4.29045e-09	8.60003e-08
AT1G75300	30.3332	35.5354	36.4178	5.66346	7.51009	9.39816	-1.86872	0.387142	4.82697	1.38627e-06	1.85365e-05
AT1G18265	21.0647	18.6561	19.1673	5.66346	1.25168	4.69908	-1.86574	0.452666	4.12167	3.76129e-05	0.0003736
AT1G67265	20.2221	11.549	27.7925	3.39807	0	6.57871	-1.85588	0.544873	3.40608	0.000659035	0.00468329
AT1G78270	64.0367	63.0754	82.4192	11.3269	18.7752	22.5556	-1.85398	0.260573	7.11501	1.11908e-12	3.45151e-11
AT1G78265	64.8793	61.2986	87.2111	14.725	15.0202	23.4954	-1.85143	0.266644	6.94348	3.82555e-12	1.11943e-10
AT3G50470	6.74071	13.3258	12.4587	1.13269	3.75504	0	-1.84799	0.556877	3.31849	0.000905041	0.0061551
AT4G18830	35.3887	23.9864	26.8342	4.53077	3.75504	10.338	-1.84016	0.389102	4.72925	2.25352e-06	2.88897e-05
AT1G62422	16.8518	20.4329	24.9174	4.53077	3.75504	4.69908	-1.83967	0.413956	4.44413	8.82486e-06	0.000101163
AT3G03700	9.26847	6.2187	3.83345	0	1.25168	0	-1.83886	0.576166	3.19154	0.00141515	0.00898372
AT5G16370	85.1014	63.9638	80.5025	21.5211	25.0336	13.1574	-1.83822	0.268397	6.84888	7.44327e-12	2.09952e-10
AT4G01330	162.62	195.445	235.757	67.9615	55.074	33.8334	-1.8374	0.233499	7.869	3.57499e-15	1.45808e-13
AT5G42680	13.4814	6.2187	13.4171	3.39807	0	0.939816	-1.83116	0.515332	3.55336	0.000380346	0.00293379
AT4G12690	33.7035	45.3077	45.0431	16.9904	10.0134	3.75926	-1.82918	0.353513	5.17431	2.28759e-07	3.58054e-06
AT1G56520	105.324	134.146	103.503	24.9192	25.0336	39.4723	-1.82609	0.234254	7.79534	6.42358e-15	2.54617e-13
AT1G22640	95.2125	81.7315	104.462	23.7865	22.5303	26.3148	-1.82358	0.268137	6.80094	1.0394e-11	2.86676e-10
AT2G03865	26.9628	55.9683	0	0	0	0	-1.82321	0.470835	3.8723	0.000107815	0.000962315
AT1G30260	112.064	116.379	185.922	28.3173	27.537	41.3519	-1.81724	0.403129	4.50783	6.54946e-06	7.72745e-05
AT1G80570	13.4814	6.2187	11.5004	2.26538	2.50336	0	-1.81668	0.523241	3.47198	0.000516644	0.00381648
AT3G50440	166.832	157.244	169.63	61.1653	38.8021	31.9537	-1.81537	0.246902	7.35258	1.94413e-13	6.66778e-12
AT1G36940	16.0092	13.3258	20.1256	2.26538	3.75504	2.81945	-1.81426	0.486826	3.72672	0.000193989	0.00163023
AT2G42900	29.4906	31.0935	26.8342	6.79615	7.51009	7.51853	-1.80693	0.365441	4.94453	7.6328e-07	1.07937e-05
AT4G07290	16.8518	23.098	23.9591	2.26538	2.50336	8.45834	-1.80032	0.436126	4.12799	3.65943e-05	0.000364167
AT5G25190	15.1666	7.10709	18.2089	2.26538	0	3.75926	-1.79587	0.490378	3.66222	0.000250039	0.00204276
AT3G10020	14.324	9.77224	12.4587	1.13269	1.25168	2.81945	-1.79308	0.512411	3.49931	0.000466471	0.00351091
AT4G21515	9.26847	3.55354	11.5004	2.26538	0	0	-1.79117	0.564783	3.17143	0.00151692	0.00954375
AT5G64510	7.5833	8.88386	9.58363	1.13269	1.25168	0.939816	-1.78695	0.535507	3.33693	0.000847106	0.00581908
AT4G19860	400.229	333.145	416.888	109.871	115.155	94.9214	-1.7868	0.197639	9.0407	1.55678e-19	9.75967e-18
AT5G18130	315.128	237.199	202.215	61.1653	88.8693	45.1112	-1.78557	0.335289	5.32545	1.00704e-07	1.67262e-06
AT3G63450	49.7127	44.4193	41.2096	10.1942	15.0202	9.39816	-1.78536	0.330157	5.4076	6.38747e-08	1.09447e-06
AT1G61795	32.0184	23.098	44.0847	13.5923	3.75504	5.6389	-1.78206	0.399804	4.45734	8.29826e-06	9.57495e-05
AT3G46130	37.0739	53.3032	40.2513	11.3269	8.76177	12.2176	-1.77671	0.346287	5.13075	2.88592e-07	4.4278e-06
AT4G31354	10.9536	6.2187	16.2922	1.13269	0	2.81945	-1.77449	0.567013	3.12955	0.00175077	0.0107337
AT4G38932	103.638	107.495	98.7114	27.1846	31.292	25.375	-1.77404	0.275387	6.44196	1.17937e-10	2.90065e-09
AT3G26490	42.972	53.3032	53.6683	15.8577	17.5235	5.6389	-1.77367	0.335947	5.2796	1.29465e-07	2.104e-06
AT3G04860	39.6017	31.9819	39.2929	10.1942	6.2584	11.2778	-1.7707	0.343266	5.1584	2.49069e-07	3.86066e-06
AT2G44735	13.4814	13.3258	9.58363	1.13269	2.50336	2.81945	-1.76894	0.484837	3.64853	0.000263748	0.00214068
AT1G68190	110.379	135.035	168.672	46.4403	38.8021	31.0139	-1.76731	0.202796	8.7147	2.91541e-18	1.63813e-16
AT5G02760	167.675	216.766	213.715	50.9711	73.8492	33.8334	-1.76228	0.312623	5.63708	1.72954e-08	3.18849e-07
AT2G36980	10.1111	14.2142	9.58363	1.13269	1.25168	2.81945	-1.76103	0.496831	3.54452	0.000393324	0.00302097
AT5G65570	11.7962	9.77224	16.2922	3.39807	1.25168	1.87963	-1.76055	0.488656	3.60284	0.000314756	0.00248779
AT4G18840	42.1294	38.2006	46.9598	5.66346	7.51009	17.8565	-1.76028	0.343493	5.12463	2.98115e-07	4.55407e-06
AT3G02550	20.2221	21.3213	18.2089	1.13269	8.76177	3.75926	-1.75561	0.434744	4.03827	5.3847e-05	0.000519632
AT2G17650	28.648	46.1961	34.5011	9.06153	13.7685	5.6389	-1.75303	0.34644	5.06013	4.18963e-07	6.18981e-06
AT2G34620	125.546	134.146	161.005	67.9615	15.0202	29.1343	-1.74751	0.302643	5.77417	7.73338e-09	1.49208e-07
AT1G68330	19.3795	21.3213	32.5844	6.79615	2.50336	7.51853	-1.74611	0.418222	4.17508	2.97882e-05	0.000301695
AT3G49170	24.4351	31.9819	23.0007	5.66346	6.2584	6.57871	-1.7333	0.417253	4.15407	3.26609e-05	0.000327492
AT3G57965	40.4442	53.3032	44.0847	11.3269	10.0134	15.0371	-1.73271	0.30836	5.61911	1.91941e-08	3.52009e-07
AT2G32010	161.777	164.351	148.546	32.848	40.0538	61.088	-1.72894	0.205102	8.42963	3.46765e-17	1.74017e-15
AT3G59320	26.9628	21.3213	18.2089	3.39807	6.2584	6.57871	-1.71919	0.410776	4.18523	2.84876e-05	0.000290472
AT3G21790	48.0275	78.178	55.5851	19.2558	16.2719	14.0972	-1.71485	0.311271	5.50919	3.60492e-08	6.38935e-07
AT1G29195	2.52777	7.10709	6.70854	0	0	0	-1.71325	0.591641	2.89576	0.00378246	0.0202207
AT1G29357	31.1758	30.2051	38.3345	9.06153	10.0134	7.51853	-1.71112	0.33952	5.03982	4.65962e-07	6.808e-06
AT4G02540	114.592	86.1734	157.172	32.848	46.3122	18.7963	-1.71109	0.330408	5.1787	2.23436e-07	3.50189e-06
AT1G08180	26.9628	19.5445	22.0424	6.79615	1.25168	7.51853	-1.70372	0.431387	3.9494	7.83466e-05	0.000731754
AT5G44060	32.0184	17.7677	48.8765	5.66346	6.2584	11.2778	-1.70347	0.422619	4.03074	5.56005e-05	0.000534671
AT3G01360	50.5553	44.4193	68.0438	19.2558	8.76177	15.9769	-1.70104	0.317034	5.36549	8.07316e-08	1.36558e-06
AT1G74088	17.6944	18.6561	21.084	1.13269	8.76177	1.87963	-1.70081	0.510145	3.33398	0.000856139	0.005865
AT1G79110	117.12	113.713	72.8356	30.5827	31.292	26.3148	-1.70048	0.241783	7.0331	2.01992e-12	6.07803e-11
AT3G45230	38.7591	33.7587	56.5434	10.1942	12.5168	12.2176	-1.69933	0.318128	5.34165	9.21034e-08	1.53945e-06
AT2G24762	36.2313	40.8657	37.3762	10.1942	5.00672	14.0972	-1.69894	0.36068	4.71039	2.47238e-06	3.14663e-05
AT3G03702	9.26847	7.10709	4.79182	1.13269	1.25168	0	-1.697	0.564929	3.00392	0.00266527	0.0153389
AT1G66230	19.3795	27.54	24.9174	4.53077	10.0134	3.75926	-1.69395	0.393707	4.30257	1.68831e-05	0.000181706
AT3G00840	2.52777	7.99547	10.542	0	2.50336	0	-1.69125	0.589981	2.86662	0.00414877	0.0217065
AT2G23180	66.5645	41.7541	62.2936	7.92884	18.7752	18.7963	-1.68924	0.344348	4.90564	9.31244e-07	1.29267e-05
AT1G29355	30.3332	24.8748	34.5011	9.06153	8.76177	6.57871	-1.68084	0.348735	4.81982	1.43691e-06	1.91651e-05
AT2G30790	6.74071	14.2142	6.70854	1.13269	1.25168	1.87963	-1.67977	0.525609	3.19586	0.00139417	0.00887455
AT3G12560	74.1478	74.6244	57.5018	22.6538	22.5303	14.0972	-1.67928	0.290449	5.78168	7.39593e-09	1.42959e-07
AT5G11550	69.0922	77.2896	80.5025	16.9904	23.7819	24.4352	-1.67924	0.259267	6.47688	9.36376e-11	2.33288e-09
AT1G31690	626.886	549.022	444.681	139.321	151.453	197.361	-1.67689	0.18031	9.30004	1.4039e-20	9.72467e-19
AT5G57790	20.2221	15.1026	13.4171	2.26538	6.2584	2.81945	-1.67601	0.452868	3.70089	0.000214848	0.00178004
AT5G37940	17.6944	6.2187	10.542	1.13269	2.50336	2.81945	-1.67555	0.550982	3.04103	0.0023577	0.0138403
AT5G57785	54.7682	40.8657	41.2096	18.1231	11.2651	7.51853	-1.67544	0.353889	4.73437	2.19732e-06	2.82377e-05
AT4G04835	21.9073	10.6606	31.626	5.66346	6.2584	3.75926	-1.67421	0.450034	3.72019	0.000199071	0.00166698
AT3G16690	22.7499	22.2096	61.3353	9.06153	6.2584	11.2778	-1.67401	0.392965	4.25994	2.04481e-05	0.000215895
AT4G35750	406.128	302.051	356.511	125.729	112.651	83.6436	-1.67356	0.196342	8.52369	1.54551e-17	8.16302e-16
AT2G25590	56.4534	42.6425	51.7516	15.8577	15.0202	12.2176	-1.67291	0.315759	5.29806	1.17038e-07	1.91383e-06
AT2G23290	9.26847	18.6561	14.3754	2.26538	2.50336	2.81945	-1.67285	0.518646	3.22541	0.00125792	0.00815965
AT3G30720	6.74071	7.10709	5.75018	0	0	1.87963	-1.6726	0.564881	2.96099	0.00306656	0.0170649
AT2G26030	42.1294	52.4148	40.2513	10.1942	12.5168	15.0371	-1.66956	0.311184	5.36518	8.08683e-08	1.36571e-06
AT1G72645	33.7035	50.638	45.0431	9.06153	13.7685	13.1574	-1.66811	0.310718	5.36856	7.93665e-08	1.34357e-06
AT4G14990	146.61	161.686	138.963	35.1134	41.3055	56.389	-1.66399	0.21701	7.6678	1.74976e-14	6.64876e-13
AT1G56010	80.8885	68.4057	41.2096	12.4596	18.7752	22.5556	-1.66275	0.325195	5.11307	3.1696e-07	4.80719e-06
AT4G35420	14.324	28.4283	36.4178	6.79615	5.00672	7.51853	-1.66218	0.415061	4.00467	6.21031e-05	0.000589157
AT3G57970	31.1758	41.7541	26.8342	7.92884	8.76177	10.338	-1.66197	0.349116	4.7605	1.93116e-06	2.51229e-05
AT5G37950	17.6944	5.33032	16.2922	2.26538	1.25168	3.75926	-1.66094	0.559721	2.96745	0.00300282	0.0168054
AT5G42750	26.1202	21.3213	28.7509	7.92884	7.51009	4.69908	-1.65991	0.385301	4.30809	1.64669e-05	0.000177679
AT5G44063	16.0092	7.99547	9.58363	2.26538	1.25168	1.87963	-1.65991	0.572453	2.89964	0.00373596	0.020038
AT2G22980	309.23	286.06	414.013	96.2788	113.903	97.7408	-1.65495	0.201721	8.20416	2.32202e-16	1.06415e-14
AT1G78550	32.0184	28.4283	42.168	9.06153	6.2584	12.2176	-1.65114	0.363663	4.54029	5.61761e-06	6.74337e-05
AT3G11840	27.8054	34.647	22.0424	7.92884	2.50336	11.2778	-1.64915	0.406045	4.06149	4.876e-05	0.000475601
AT2G33170	149.981	159.021	156.213	44.175	62.584	38.5324	-1.64335	0.18747	8.76591	1.85268e-18	1.06653e-16
AT1G34640	55.6108	39.9774	55.5851	10.1942	13.7685	18.7963	-1.64226	0.316594	5.18726	2.13406e-07	3.35964e-06
AT3G01350	23.5925	20.4329	22.0424	4.53077	3.75504	7.51853	-1.63396	0.423789	3.85559	0.000115451	0.0010227
AT2G46330	246.036	204.329	260.675	64.5634	70.0941	78.0047	-1.63044	0.264692	6.15977	7.2851e-10	1.62526e-08
AT1G33350	5.89812	14.2142	7.66691	2.26538	2.50336	0	-1.62884	0.532968	3.05617	0.00224185	0.0132895
AT5G59220	16.0092	10.6606	8.62527	3.39807	1.25168	1.87963	-1.62759	0.506035	3.21636	0.00129829	0.00837016
AT2G20170	10.1111	8.88386	9.58363	0	2.50336	1.87963	-1.62741	0.522202	3.11643	0.00183053	0.0111709
AT1G49530	8.42588	5.33032	9.58363	0	1.25168	1.87963	-1.62584	0.557107	2.91836	0.00351878	0.0190423
AT1G06160	12.6388	8.88386	7.66691	1.13269	1.25168	1.87963	-1.62583	0.551098	2.95016	0.00317609	0.0175291
AT1G14600	16.8518	11.549	19.1673	6.79615	1.25168	2.81945	-1.62434	0.434924	3.73476	0.000187896	0.00158154
AT3G50840	126.388	102.164	75.7107	27.1846	18.7752	44.1713	-1.62222	0.268106	6.05068	1.44239e-09	3.09061e-08
AT2G15830	85.944	87.0618	68.0438	14.725	18.7752	36.6528	-1.61885	0.319623	5.06489	4.08629e-07	6.05833e-06
AT4G27450	89.3144	134.146	123.629	29.45	40.0538	32.8936	-1.61814	0.316506	5.11252	3.17888e-07	4.81435e-06
AT1G24148	57.296	54.1915	42.168	14.725	11.2651	16.9167	-1.61414	0.385947	4.18228	2.88594e-05	0.000293979
AT1G15740	248.564	226.538	304.76	81.5538	76.3525	84.5834	-1.6098	0.217826	7.39032	1.46474e-13	5.09813e-12
AT1G33055	4.21294	2.66516	9.58363	1.13269	0	0	-1.60756	0.589502	2.72698	0.00639178	0.0309723
AT5G57910	25.2777	37.3122	33.5427	10.1942	13.7685	2.81945	-1.6021	0.408474	3.92217	8.77568e-05	0.000804006
AT1G65000	31.1758	23.9864	21.084	5.66346	5.00672	9.39816	-1.60085	0.414657	3.86066	0.000113082	0.00100382
AT1G60060	25.2777	38.2006	42.168	4.53077	17.5235	8.45834	-1.59967	0.389897	4.1028	4.08172e-05	0.000403153
AT2G29130	11.7962	4.44193	4.79182	1.13269	0	0.939816	-1.59927	0.597352	2.67726	0.00742263	0.0347943
AT5G65207	61.5089	55.0799	47.9182	13.5923	16.2719	13.1574	-1.59918	0.470248	3.40072	0.000672096	0.00475851
AT1G05640	27.8054	16.8793	24.9174	2.26538	6.2584	9.39816	-1.59651	0.438127	3.64394	0.000268494	0.0021742
AT2G35420	8.42588	3.55354	14.3754	3.39807	1.25168	0	-1.59478	0.535972	2.9755	0.00292515	0.0164667
AT1G53180	16.0092	9.77224	13.4171	1.13269	6.2584	1.87963	-1.59407	0.516165	3.08829	0.00201313	0.012131
AT4G33150	105.324	76.4012	85.2943	26.0519	33.7954	23.4954	-1.58461	0.280894	5.64133	1.68745e-08	3.11906e-07
AT2G43870	4.21294	6.2187	2.87509	0	0	0	-1.58336	0.594586	2.66296	0.00774563	0.0360207
AT3G52060	72.4626	72.8476	57.5018	20.3884	26.2853	16.9167	-1.58273	0.265581	5.9595	2.53011e-09	5.25085e-08
AT1G04360	10.9536	12.4374	7.66691	1.13269	2.50336	1.87963	-1.58247	0.504902	3.13421	0.00172318	0.0106139
AT2G37480	398.544	383.783	397.721	129.127	125.168	128.755	-1.58241	0.157975	10.0169	1.28484e-23	1.11707e-21
AT3G62890	10.1111	6.2187	11.5004	0	1.25168	3.75926	-1.5823	0.526798	3.00362	0.00266788	0.0153456
AT5G66880	204.749	223.873	246.299	69.0942	77.6042	70.4862	-1.58225	0.201628	7.84734	4.24961e-15	1.71995e-13
AT3G47640	21.0647	21.3213	14.3754	5.66346	2.50336	5.6389	-1.58168	0.43507	3.63546	0.00027748	0.00223411
AT2G31150	69.9348	91.5037	72.8356	20.3884	26.2853	27.2547	-1.5766	0.231542	6.8091	9.82116e-12	2.71942e-10
AT3G04035	2.52777	13.3258	20.1256	2.26538	3.75504	0.939816	-1.57656	0.564324	2.79371	0.00521076	0.0262614
AT1G20620	15779.2	14706.3	14217.3	4240.8	5352.19	4887.04	-1.57542	0.184397	8.54364	1.30054e-17	6.88634e-16
AT4G16447	11.7962	20.4329	19.1673	5.66346	3.75504	3.75926	-1.5753	0.45299	3.47757	0.000505986	0.00375218
AT1G49010	80.0459	99.4992	101.587	26.0519	27.537	34.7732	-1.57478	0.21915	7.18583	6.6801e-13	2.14446e-11
AT5G53980	18.5369	15.1026	9.58363	4.53077	2.50336	2.81945	-1.57466	0.528611	2.97886	0.00289324	0.0163306
AT1G53700	10.1111	18.6561	11.5004	4.53077	1.25168	2.81945	-1.57321	0.508602	3.0932	0.00198009	0.0119661
AT4G29170	15.1666	20.4329	11.5004	4.53077	1.25168	5.6389	-1.57212	0.432063	3.63865	0.000274075	0.00221007
AT5G04190	21.9073	10.6606	22.0424	4.53077	6.2584	2.81945	-1.57137	0.43409	3.61992	0.00029469	0.00235029
AT5G00875	24.4351	33.7587	43.1263	5.66346	11.2651	10.338	-1.56948	0.406041	3.86533	0.000110937	0.000987683
AT2G20110	9.26847	12.4374	21.084	1.13269	2.50336	5.6389	-1.56482	0.498285	3.14041	0.00168709	0.0104281
AT5G23130	35.3887	33.7587	24.9174	11.3269	11.2651	5.6389	-1.56103	0.349871	4.46173	8.13012e-06	9.3912e-05
AT2G26211	5.89812	16.8793	9.58363	1.13269	1.25168	3.75926	-1.55962	0.520301	2.99753	0.00272176	0.0155739
AT1G11700	59.8238	47.9728	38.3345	5.66346	20.0269	15.9769	-1.55904	0.370163	4.21175	2.534e-05	0.00026115
AT3G09775	2.52777	10.6606	7.66691	1.13269	0	1.87963	-1.55829	0.575243	2.70893	0.00675012	0.0323378
AT5G57780	54.7682	39.9774	42.168	9.06153	8.76177	22.5556	-1.55736	0.301773	5.16069	2.4604e-07	3.82382e-06
AT3G08820	10.9536	14.2142	7.66691	3.39807	1.25168	1.87963	-1.55665	0.516499	3.01384	0.00257964	0.0149479
AT4G11360	151.666	113.713	141.838	29.45	52.5706	48.8704	-1.55454	0.261504	5.9446	2.77138e-09	5.73466e-08
AT5G19340	20.2221	22.2096	22.0424	3.39807	7.51009	6.57871	-1.55298	0.417592	3.71889	0.000200103	0.00167363
AT3G24500	35.3887	22.2096	36.4178	7.92884	10.0134	9.39816	-1.55275	0.375741	4.1325	3.58843e-05	0.000357553
AT2G33760	4.21294	10.6606	6.70854	2.26538	0	0.939816	-1.55212	0.562657	2.75856	0.00580575	0.0285866
AT1G60460	11.7962	15.1026	10.542	2.26538	1.25168	3.75926	-1.5495	0.552238	2.80585	0.00501841	0.0254132
AT1G36060	6.74071	5.33032	15.3338	0	1.25168	2.81945	-1.54897	0.594182	2.6069	0.00913667	0.0412458
AT1G61065	18.5369	17.7677	29.7093	5.66346	3.75504	8.45834	-1.54873	0.40286	3.84434	0.000120876	0.00106451
AT1G80630	42.1294	49.7496	52.71	14.725	16.2719	14.0972	-1.54698	0.302658	5.11132	3.19919e-07	4.83472e-06
AT4G33790	9.26847	6.2187	6.70854	0	2.50336	0.939816	-1.54662	0.572933	2.69949	0.00694464	0.03305
AT3G15130	13.4814	7.10709	12.4587	2.26538	3.75504	0.939816	-1.5446	0.51084	3.02366	0.00249739	0.0145471
AT5G54590	15.1666	17.7677	24.9174	7.92884	2.50336	4.69908	-1.54333	0.397474	3.88285	0.000103239	0.000925385
AT1G50590	20.2221	15.9909	18.2089	6.79615	3.75504	3.75926	-1.54278	0.443556	3.47822	0.000504759	0.0037444
AT1G25440	1146.76	1263.28	1242.04	326.215	366.743	515.019	-1.54056	0.18988	8.11331	4.92599e-16	2.16815e-14
AT1G67400	62.3515	47.0844	39.2929	13.5923	12.5168	19.7361	-1.54016	0.299392	5.1443	2.68525e-07	4.14702e-06
AT3G22150	157.564	189.226	190.714	61.1653	52.5706	63.9075	-1.53883	0.182825	8.41696	3.86369e-17	1.92974e-15
AT2G46710	253.619	238.087	288.467	103.075	80.1076	78.0047	-1.53869	0.158411	9.71325	2.64759e-22	2.06405e-20
AT1G55850	78.3607	80.8431	45.0431	26.0519	20.0269	18.7963	-1.53677	0.293294	5.23968	1.60858e-07	2.57263e-06
AT1G34315	12.6388	25.7632	13.4171	3.39807	5.00672	4.69908	-1.53423	0.476377	3.22063	0.0012791	0.00826661
AT2G08730	7.5833	3.55354	13.4171	3.39807	1.25168	0	-1.53409	0.549433	2.79214	0.00523613	0.0263767
AT5G57900	59.8238	55.0799	49.8349	18.1231	23.7819	11.2778	-1.5327	0.295783	5.18183	2.19724e-07	3.44882e-06
AT5G51910	16.8518	14.2142	15.3338	3.39807	5.00672	3.75926	-1.53167	0.445473	3.43831	0.000585368	0.00424547
AT3G54780	24.4351	28.4283	16.2922	7.92884	7.51009	4.69908	-1.53031	0.422993	3.61781	0.000297109	0.00236601
AT4G36795	10.1111	8.88386	5.75018	2.26538	1.25168	1.87963	-1.52999	0.559996	2.73214	0.00629236	0.0305915
AT2G37930	39.6017	29.3167	49.8349	6.79615	17.5235	12.2176	-1.52997	0.346054	4.42119	9.81604e-06	0.000111257
AT4G14750	43.8146	52.4148	46.0014	13.5923	20.0269	12.2176	-1.5296	0.280543	5.45228	4.97273e-08	8.64682e-07
AT5G13295	16.8518	15.1026	8.62527	4.53077	6.2584	0	-1.52934	0.46844	3.26476	0.00109558	0.00723548
AT1G08825	26.1202	10.6606	15.3338	3.39807	10.0134	0.939816	-1.52863	0.500329	3.05525	0.0022487	0.0133039
AT1G55920	74.1478	64.8522	41.2096	20.3884	7.51009	26.3148	-1.52513	0.310403	4.91338	8.95215e-07	1.24922e-05
AT1G09190	9.26847	11.549	11.5004	1.13269	1.25168	3.75926	-1.52366	0.513028	2.96993	0.0029787	0.0166881
AT1G10150	99.4254	94.1689	119.795	24.9192	47.5639	31.9537	-1.52327	0.232002	6.56574	5.17744e-11	1.32426e-09
AT4G34920	374.952	419.318	445.639	126.861	131.426	154.13	-1.52236	0.215096	7.07759	1.46681e-12	4.4589e-11
AT5G26600	75.833	75.5128	77.6274	24.9192	25.0336	24.4352	-1.52183	0.255345	5.95992	2.52357e-09	5.24242e-08
AT5G67245	10.1111	6.2187	9.58363	0	2.50336	2.81945	-1.51906	0.540206	2.812	0.00492345	0.0250344
AT3G20660	5.89812	12.4374	16.2922	2.26538	3.75504	0	-1.51843	0.557642	2.72294	0.00647036	0.031245
AT3G18900	13.4814	12.4374	21.084	5.66346	2.50336	3.75926	-1.51787	0.509778	2.97752	0.00290595	0.0163936
AT2G44140	295.749	306.493	312.426	112.136	100.134	93.9816	-1.51585	0.211764	7.15822	8.17328e-13	2.58112e-11
AT5G41110	69.9348	55.9683	67.0854	27.1846	26.2853	11.2778	-1.51575	0.266365	5.69049	1.26674e-08	2.37046e-07
AT3G50630	24.4351	31.9819	26.8342	3.39807	7.51009	12.2176	-1.51535	0.394203	3.84408	0.000121008	0.00106522
AT4G01840	26.1202	33.7587	32.5844	6.79615	11.2651	10.338	-1.51532	0.344603	4.39728	1.09616e-05	0.000123118
AT5G52870	31.1758	42.6425	31.626	7.92884	11.2651	13.1574	-1.51527	0.333972	4.53713	5.70241e-06	6.82577e-05
AT1G29460	42.972	44.4193	33.5427	9.06153	21.2786	8.45834	-1.51495	0.346667	4.37005	1.24218e-05	0.000138051
AT5G02425	14.324	14.2142	13.4171	2.26538	5.00672	3.75926	-1.51452	0.475536	3.18487	0.00144818	0.00917409
AT5G06155	5.89812	4.44193	5.75018	1.13269	0	0	-1.51108	0.583818	2.58826	0.00964614	0.0430581
AT2G19240	3.37035	8.88386	2.87509	0	1.25168	0	-1.5101	0.578114	2.61211	0.00899854	0.0407354
AT2G38830	11.7962	13.3258	10.542	3.39807	2.50336	2.81945	-1.5092	0.475443	3.1743	0.00150196	0.00946376
AT3G18200	4.21294	5.33032	9.58363	0	1.25168	0.939816	-1.50537	0.579666	2.59697	0.00940503	0.0422048
AT5G41109	8.42588	11.549	8.62527	2.26538	3.75504	0.939816	-1.50484	0.542828	2.77223	0.0055674	0.0276498
AT5G38970	13.4814	8.88386	16.2922	3.39807	1.25168	3.75926	-1.50333	0.520816	2.8865	0.00389559	0.0206637
AT5G24890	195.48	236.311	261.633	56.6346	103.89	77.0649	-1.49991	0.188513	7.95653	1.76925e-15	7.46088e-14
AT1G13430	20.2221	2.66516	1.91673	1.13269	2.50336	0	-1.49968	0.592646	2.53049	0.0113904	0.0491767
AT5G52990	33.7035	14.2142	18.2089	5.66346	3.75504	9.39816	-1.49933	0.456468	3.28464	0.00102114	0.0068185
AT4G25940	112.064	145.695	117.879	36.2461	42.5572	46.9908	-1.49829	0.237889	6.29825	3.01017e-10	7.09776e-09
AT5G09785	29.4906	39.089	50.7933	13.5923	13.7685	10.338	-1.49768	0.376699	3.9758	7.01418e-05	0.000659523
AT1G79700	108.694	117.267	157.172	36.2461	48.8156	43.2315	-1.49702	0.245512	6.09755	1.07708e-09	2.35808e-08
AT2G19930	38.7591	25.7632	33.5427	10.1942	10.0134	10.338	-1.49667	0.357269	4.1892	2.79935e-05	0.000285848
AT5G54520	21.0647	12.4374	23.0007	6.79615	1.25168	7.51853	-1.49518	0.403033	3.70982	0.000207405	0.00172378
AT3G59940	728.839	864.399	955.488	208.415	370.498	275.366	-1.49448	0.251512	5.94197	2.81622e-09	5.81606e-08
AT3G09020	32.0184	19.5445	20.1256	3.39807	13.7685	2.81945	-1.49371	0.488651	3.0568	0.00223717	0.0132654
AT1G68840	203.064	188.338	264.508	44.175	121.413	47.9306	-1.49241	0.30907	4.82871	1.37417e-06	1.84214e-05
AT3G51710	10.9536	8.88386	13.4171	0	2.50336	4.69908	-1.49224	0.535485	2.78672	0.00532452	0.02672
AT5G10930	32.0184	32.8703	28.7509	7.92884	5.00672	14.0972	-1.49158	0.378842	3.9372	8.24387e-05	0.000764902
AT1G72920	16.8518	7.99547	23.0007	2.26538	6.2584	3.75926	-1.49096	0.472453	3.15579	0.00160063	0.00997536
AT5G12890	55.6108	57.7451	61.3353	16.9904	12.5168	26.3148	-1.49047	0.291143	5.11937	3.06565e-07	4.66459e-06
AT1G05560	92.6847	111.937	91.0445	40.7769	35.0471	25.375	-1.49029	0.218585	6.81787	9.23977e-12	2.56854e-10
AT2G22660	232.554	196.333	199.34	64.5634	82.6109	65.7871	-1.4884	0.241903	6.15288	7.60881e-10	1.6939e-08
AT3G48390	12.6388	15.1026	20.1256	4.53077	6.2584	1.87963	-1.48554	0.469821	3.16193	0.00156725	0.00982237
AT3G26445	10.9536	9.77224	15.3338	7.92884	1.25168	0	-1.48452	0.497162	2.98598	0.00282671	0.0160494
AT3G01635	5.89812	7.10709	4.79182	0	1.25168	0.939816	-1.48184	0.580377	2.55324	0.0106726	0.0466544
AT4G03340	21.0647	16.8793	8.62527	5.66346	0	5.6389	-1.4814	0.487239	3.04039	0.00236271	0.013862
AT1G19840	5.05553	3.55354	7.66691	0	0	1.87963	-1.48112	0.569297	2.60166	0.00927735	0.0417416
AT3G09275	684.182	783.556	892.236	191.425	347.967	259.389	-1.48053	0.252475	5.86407	4.51652e-09	9.02748e-08
AT1G08815	8.42588	7.10709	8.62527	3.39807	1.25168	0.939816	-1.47974	0.547722	2.70161	0.00690036	0.0329306
AT5G16420	22.7499	14.2142	23.9591	3.39807	6.2584	7.51853	-1.4787	0.411497	3.59347	0.000326309	0.00256661
AT3G63215	52.2405	39.089	28.7509	9.06153	12.5168	16.9167	-1.47837	0.351119	4.21044	2.54874e-05	0.000262413
AT2G39400	159.249	143.919	130.337	47.573	42.5572	54.5093	-1.47798	0.279444	5.28898	1.23e-07	2.00511e-06
AT1G13700	47.1849	41.7541	72.8356	16.9904	21.2786	14.0972	-1.4765	0.339524	4.34874	1.36925e-05	0.000150589
AT2G37320	21.0647	9.77224	7.66691	3.39807	2.50336	3.75926	-1.47449	0.500015	2.9489	0.00318908	0.0175916
AT5G06620	13.4814	3.55354	14.3754	1.13269	1.25168	3.75926	-1.47406	0.517566	2.84807	0.00439852	0.0227655
AT5G53830	17.6944	19.5445	22.0424	9.06153	2.50336	4.69908	-1.47266	0.45541	3.23369	0.00122201	0.00795852
AT4G37770	5.89812	15.1026	15.3338	2.26538	2.50336	3.75926	-1.47038	0.519167	2.83218	0.00462313	0.0237301
AT5G59662	5.05553	8.88386	8.62527	1.13269	1.25168	1.87963	-1.47002	0.575295	2.55525	0.0106112	0.0464722
AT5G67150	64.0367	50.638	46.0014	18.1231	15.0202	19.7361	-1.46891	0.295909	4.96405	6.9038e-07	9.83196e-06
AT4G05910	8.42588	12.4374	10.542	1.13269	2.50336	3.75926	-1.46867	0.502106	2.92502	0.00344434	0.0187355
AT3G02010	13.4814	10.6606	17.2505	2.26538	3.75504	3.75926	-1.46818	0.512341	2.86564	0.00416169	0.021758
AT1G52640	5.05553	7.99547	1.91673	0	1.25168	0	-1.46691	0.572097	2.5641	0.0103445	0.0454835
AT3G04720	130.601	131.481	56.5434	22.6538	13.7685	62.0278	-1.46624	0.404582	3.62409	0.000289986	0.0023189
AT1G08087	19.3795	17.7677	9.58363	0	8.76177	3.75926	-1.46549	0.532591	2.75161	0.00593024	0.0290827
AT1G19480	26.9628	33.7587	23.9591	11.3269	6.2584	8.45834	-1.46508	0.371468	3.94403	8.01247e-05	0.000746711
AT4G31730	10.1111	8.88386	14.3754	2.26538	1.25168	2.81945	-1.46372	0.569508	2.57015	0.0101653	0.0448544
AT1G30160	5.89812	5.33032	6.70854	1.13269	0	0.939816	-1.45983	0.585335	2.494	0.0126312	0.0532842
AT5G26980	30.3332	30.2051	32.5844	4.53077	12.5168	12.2176	-1.45655	0.370363	3.93276	8.39745e-05	0.000775406
AT4G21480	5.89812	8.88386	8.62527	2.26538	1.25168	0.939816	-1.45612	0.540866	2.69221	0.00709807	0.0336235
AT5G41320	31.1758	20.4329	31.626	11.3269	6.2584	8.45834	-1.45555	0.364558	3.99264	6.53414e-05	0.000617935
AT5G41080	11.7962	9.77224	23.0007	0	10.0134	0	-1.45448	0.537349	2.70677	0.00679411	0.0325101
AT1G27420	4.21294	10.6606	6.70854	0	2.50336	0.939816	-1.45198	0.581426	2.49728	0.012515	0.0529232
AT4G13250	1243.66	1448.07	1172.08	436.086	418.061	523.477	-1.45137	0.151565	9.57593	1.00947e-21	7.58971e-20
AT1G02620	14.324	8.88386	20.1256	2.26538	5.00672	4.69908	-1.45031	0.474783	3.05468	0.00225301	0.013322
AT1G05562	92.6847	111.937	92.0029	43.0423	37.5504	24.4352	-1.4463	0.220123	6.57042	5.01736e-11	1.28956e-09
AT2G41835	23.5925	20.4329	31.626	4.53077	10.0134	9.39816	-1.44577	0.376197	3.84313	0.000121474	0.00106888
AT3G05936	16.8518	18.6561	13.4171	6.79615	2.50336	4.69908	-1.44401	0.447895	3.22399	0.00126418	0.00818773
AT3G26237	10.9536	8.88386	15.3338	2.26538	3.75504	2.81945	-1.44358	0.489598	2.9485	0.00319323	0.0176098
AT1G23340	12.6388	11.549	20.1256	6.79615	2.50336	2.81945	-1.44339	0.462453	3.12117	0.00180135	0.0110247
AT4G22550	8.42588	8.88386	2.87509	0	1.25168	1.87963	-1.44189	0.538418	2.67801	0.00740621	0.0347573
AT4G38860	208.962	232.757	181.131	61.1653	85.1143	71.426	-1.44172	0.23244	6.20255	5.5556e-10	1.25937e-08
AT4G39952	6.74071	9.77224	16.2922	2.26538	1.25168	3.75926	-1.44057	0.508013	2.8357	0.00457255	0.0234933
AT1G28260	111.222	124.374	133.212	35.1134	46.3122	46.9908	-1.43984	0.246709	5.83619	5.34093e-09	1.05456e-07
AT3G60220	29.4906	23.9864	28.7509	11.3269	10.0134	5.6389	-1.43708	0.362596	3.96329	7.39229e-05	0.000692581
AT5G55790	103.638	104.83	104.462	38.5115	40.0538	29.1343	-1.43516	0.294315	4.87628	1.08107e-06	1.47926e-05
AT5G52900	24.4351	23.9864	23.9591	7.92884	10.0134	3.75926	-1.43491	0.395075	3.63199	0.000281239	0.0022618
AT2G22890	20.2221	15.1026	27.7925	5.66346	8.76177	5.6389	-1.43471	0.401181	3.57621	0.000348607	0.00272173
AT1G48880	25.2777	33.7587	36.4178	10.1942	7.51009	13.1574	-1.4336	0.333205	4.30245	1.6892e-05	0.000181709
AT1G30200	121.333	187.449	167.714	64.5634	75.1009	26.3148	-1.43357	0.28305	5.06472	4.09008e-07	6.05969e-06
AT5G19151	3.37035	9.77224	7.66691	1.13269	0	1.87963	-1.43348	0.565237	2.53606	0.0112106	0.0485442
AT5G45455	3.37035	8.88386	9.58363	1.13269	1.25168	1.87963	-1.43274	0.536289	2.67158	0.00754954	0.0352874
AT3G45420	12.6388	22.2096	15.3338	6.79615	5.00672	1.87963	-1.4322	0.496077	2.88704	0.0038888	0.0206481
AT2G22200	13.4814	5.33032	20.1256	1.13269	3.75504	4.69908	-1.42925	0.489032	2.9226	0.00347118	0.0188523
AT1G35260	15.1666	7.99547	6.70854	2.26538	0	3.75926	-1.42766	0.562179	2.53951	0.0111009	0.0481578
AT3G18320	19.3795	10.6606	17.2505	1.13269	1.25168	8.45834	-1.42617	0.549369	2.59602	0.00943105	0.0422856
AT1G23980	18.5369	28.4283	22.0424	4.53077	6.2584	10.338	-1.42562	0.389042	3.66444	0.000247881	0.00202748
AT5G20630	2221.06	1997.09	2908.63	668.288	823.606	1001.84	-1.42332	0.269857	5.27434	1.33235e-07	2.1603e-06
AT5G38040	10.1111	7.99547	1.91673	0	0	2.81945	-1.42172	0.549477	2.5874	0.00967031	0.0431295
AT1G17147	30.3332	16.8793	11.5004	6.79615	1.25168	8.45834	-1.42119	0.479662	2.96289	0.00304762	0.0169944
AT1G29500	51.3979	67.5173	67.0854	22.6538	32.5437	8.45834	-1.42077	0.335685	4.23245	2.31162e-05	0.000241054
AT3G23740	48.0275	57.7451	53.6683	7.92884	26.2853	19.7361	-1.4193	0.336523	4.21753	2.46989e-05	0.000255541
AT1G53887	14.324	12.4374	11.5004	4.53077	3.75504	2.81945	-1.4189	0.491071	2.88939	0.00385991	0.0205483
AT3G55630	192.953	236.311	142.796	71.3596	62.584	70.4862	-1.41731	0.230693	6.14372	8.06094e-10	1.79267e-08
AT1G26900	16.0092	15.9909	15.3338	5.66346	2.50336	5.6389	-1.41602	0.433033	3.27001	0.00107543	0.00712468
AT2G17040	31.1758	31.9819	36.4178	6.79615	6.2584	16.9167	-1.41565	0.434275	3.25979	0.00111494	0.007345
AT2G36026	5.05553	12.4374	11.5004	5.66346	0	0.939816	-1.41489	0.53794	2.6302	0.00853348	0.0389978
AT5G40450	1444.2	1239.3	1254.5	202.752	592.045	581.746	-1.41412	0.284419	4.97194	6.62847e-07	9.49421e-06
AT2G21210	90.9995	117.267	103.503	26.0519	27.537	54.5093	-1.41393	0.232206	6.08914	1.1352e-09	2.46996e-08
AT3G07310	261.202	260.297	316.26	118.933	78.8559	106.199	-1.4129	0.168399	8.39021	4.85285e-17	2.38989e-15
AT1G43650	16.0092	15.1026	12.4587	3.39807	7.51009	1.87963	-1.41269	0.475605	2.9703	0.00297513	0.0166726
AT2G42365	19.3795	17.7677	27.7925	4.53077	7.51009	7.51853	-1.41041	0.414463	3.40299	0.000666531	0.00472385
AT4G19160	266.258	261.185	336.386	107.606	75.1009	126.875	-1.41022	0.210593	6.69642	2.1359e-11	5.73383e-10
AT3G20898	12.6388	19.5445	16.2922	3.39807	7.51009	3.75926	-1.41018	0.440443	3.20173	0.00136607	0.00872987
AT2G21200	9.26847	12.4374	23.9591	2.26538	2.50336	7.51853	-1.41016	0.485736	2.90315	0.00369432	0.0198499
AT3G49790	102.796	118.155	134.171	41.9096	38.8021	43.2315	-1.41009	0.29372	4.8008	1.58033e-06	2.0941e-05
AT5G47900	30.3332	23.9864	27.7925	7.92884	5.00672	13.1574	-1.40928	0.371619	3.79228	0.000149269	0.00128827
AT5G24318	6.74071	7.10709	9.58363	3.39807	1.25168	0	-1.40611	0.568659	2.47268	0.0134106	0.0558827
AT3G03830	8.42588	11.549	13.4171	4.53077	1.25168	2.81945	-1.40561	0.520193	2.7021	0.00689038	0.0328905
AT1G12060	15.1666	30.2051	26.8342	10.1942	5.00672	7.51853	-1.40334	0.408719	3.4335	0.000595832	0.00430806
AT1G07485	10.1111	4.44193	11.5004	3.39807	0	1.87963	-1.40257	0.532161	2.63561	0.00839858	0.0384895
AT4G04515	7.5833	7.99547	3.83345	1.13269	0	1.87963	-1.40064	0.564535	2.48104	0.0130998	0.0547932
AT1G54120	7.5833	4.44193	9.58363	2.26538	0	1.87963	-1.40016	0.526213	2.66082	0.00779517	0.0362192
AT4G34630	62.3515	73.736	69.0022	24.9192	21.2786	26.3148	-1.39941	0.246291	5.68195	1.33169e-08	2.481e-07
AT5G40250	63.1941	64.8522	113.087	24.9192	30.0403	30.0741	-1.39923	0.26957	5.19059	2.09634e-07	3.30517e-06
AT3G18050	569.59	550.799	709.189	231.069	212.786	230.255	-1.39703	0.171555	8.14334	3.84533e-16	1.71755e-14
AT4G30410	28.648	26.6516	26.8342	2.26538	15.0202	10.338	-1.39692	0.362573	3.8528	0.000116776	0.00103356
AT5G65683	101.953	89.727	112.129	32.848	22.5303	51.6899	-1.39663	0.239211	5.83846	5.26851e-09	1.04123e-07
AT4G31408	20.2221	13.3258	34.5011	6.79615	12.5168	2.81945	-1.39382	0.423286	3.29286	0.000991742	0.00664738
AT1G80180	222.443	210.547	224.257	87.2172	66.3391	84.5834	-1.39175	0.233136	5.9697	2.3769e-09	4.97687e-08
AT4G27260	107.851	71.9593	92.9612	39.6442	46.3122	12.2176	-1.39064	0.290176	4.79241	1.64793e-06	2.17463e-05
AT4G37890	21.9073	35.5354	34.5011	6.79615	6.2584	15.9769	-1.38829	0.402284	3.45102	0.000558464	0.00407589
AT5G58540	31.1758	37.3122	45.0431	7.92884	11.2651	18.7963	-1.38822	0.329117	4.21801	2.46468e-05	0.000255126
AT1G65370	84.2588	58.6335	60.3769	16.9904	25.0336	30.0741	-1.38689	0.2812	4.93205	8.13712e-07	1.14456e-05
AT1G18745	10.9536	5.33032	9.58363	1.13269	3.75504	0.939816	-1.3855	0.553154	2.50473	0.0122545	0.0520406
AT5G46680	13.4814	8.88386	8.62527	3.39807	3.75504	0.939816	-1.3846	0.517155	2.67735	0.0074208	0.0347943
AT1G13090	198.008	177.677	166.755	79.2884	50.0672	69.5464	-1.38429	0.210538	6.57503	4.86425e-11	1.25173e-09
AT2G41082	6.74071	11.549	2.87509	1.13269	2.50336	0.939816	-1.38291	0.549466	2.51683	0.0118415	0.0506736
AT1G21520	61.5089	49.7496	48.8765	13.5923	15.0202	25.375	-1.38273	0.371704	3.71997	0.000199245	0.00166777
AT2G42640	28.648	27.54	17.2505	9.06153	6.2584	8.45834	-1.38215	0.379725	3.63987	0.000272776	0.00220128
AT5G40380	85.1014	100.388	132.254	38.5115	38.8021	37.5926	-1.38214	0.236269	5.84986	4.91978e-09	9.77691e-08
AT3G62980	459.211	491.277	546.267	176.7	201.521	182.324	-1.3819	0.151704	9.10921	8.29808e-20	5.29648e-18
AT5G02515	100.268	99.4992	125.546	37.3788	41.3055	38.5324	-1.3786	0.259699	5.30845	1.10562e-07	1.82489e-06
AT3G18070	10.9536	12.4374	13.4171	3.39807	2.50336	4.69908	-1.37729	0.471607	2.92041	0.00349567	0.0189535
AT3G05700	53.9257	61.2986	73.794	23.7865	16.2719	27.2547	-1.37691	0.261241	5.27064	1.35949e-07	2.19818e-06
AT1G67910	39.6017	20.4329	30.6676	5.66346	13.7685	9.39816	-1.37677	0.435696	3.15993	0.00157807	0.00987849
AT4G14130	27.8054	33.7587	210.84	22.6538	45.0605	4.69908	-1.37595	0.545109	2.52418	0.0115969	0.0499609
AT5G46780	18.5369	16.8793	18.2089	3.39807	10.0134	3.75926	-1.37565	0.433901	3.17043	0.00152214	0.00956523
AT1G53710	65.7219	79.0663	72.8356	28.3173	20.0269	30.0741	-1.37369	0.272989	5.03202	4.85347e-07	7.07655e-06
AT4G37480	39.6017	54.1915	51.7516	10.1942	31.292	11.2778	-1.37333	0.315793	4.34884	1.36862e-05	0.000150589
AT2G35070	6.74071	9.77224	6.70854	0	2.50336	2.81945	-1.37293	0.56056	2.44922	0.0143166	0.0588344
AT2G44580	28.648	38.2006	36.4178	5.66346	15.0202	14.0972	-1.37165	0.381504	3.59537	0.000323932	0.00255077
AT5G21170	89.3144	82.6199	110.212	29.45	42.5572	31.9537	-1.37065	0.236731	5.78991	7.04246e-09	1.36379e-07
AT5G23810	9.26847	15.9909	17.2505	6.79615	5.00672	0	-1.37064	0.545615	2.5121	0.0120016	0.0512238
AT5G67350	26.1202	34.647	21.084	6.79615	8.76177	11.2778	-1.36948	0.373801	3.66365	0.000248643	0.00203214
AT3G53210	12.6388	6.2187	6.70854	1.13269	3.75504	0.939816	-1.36872	0.539317	2.53788	0.0111527	0.0483529
AT2G32150	72.4626	60.4102	101.587	36.2461	26.2853	21.6158	-1.36851	0.291448	4.69554	2.65901e-06	3.36389e-05
AT5G34930	24.4351	45.3077	28.7509	9.06153	12.5168	12.2176	-1.3683	0.350956	3.89879	9.66729e-05	0.000873571
AT4G23410	7.5833	7.10709	7.66691	3.39807	0	1.87963	-1.36809	0.545995	2.50568	0.0122216	0.0519351
AT5G08840	26.9628	16.8793	27.7925	11.3269	3.75504	8.45834	-1.3619	0.389571	3.49589	0.000472484	0.00354858
AT1G60010	201.379	199.887	220.424	75.8903	71.3458	86.4631	-1.36017	0.170513	7.97696	1.49983e-15	6.41436e-14
AT3G61810	9.26847	5.33032	12.4587	3.39807	1.25168	1.87963	-1.35934	0.533869	2.54621	0.01089	0.0474378
AT2G34170	132.286	159.909	168.672	56.6346	63.8357	54.5093	-1.35931	0.171287	7.93585	2.09066e-15	8.76377e-14
AT3G19002	50.5553	58.6335	43.1263	13.5923	18.7752	21.6158	-1.35926	0.320511	4.24091	2.22617e-05	0.000233064
AT5G23660	149.981	127.928	153.338	61.1653	71.3458	24.4352	-1.35905	0.307065	4.42595	9.60207e-06	0.000108949
AT1G21920	133.129	107.495	94.878	43.0423	56.3256	26.3148	-1.3584	0.247627	5.48568	4.11883e-08	7.23346e-07
AT3G51960	13.4814	17.7677	8.62527	3.39807	6.2584	1.87963	-1.35836	0.482069	2.81778	0.00483569	0.0246593
AT1G06270	20.2221	19.5445	16.2922	4.53077	1.25168	10.338	-1.35833	0.455818	2.97998	0.00288265	0.0162926
AT1G32700	140.712	111.937	155.255	32.848	77.6042	43.2315	-1.35786	0.225727	6.0155	1.79332e-09	3.79634e-08
AT5G39850	26.9628	18.6561	25.8758	10.1942	7.51009	5.6389	-1.35776	0.427374	3.17699	0.00148815	0.0093907
AT1G72855	23.5925	23.098	16.2922	6.79615	5.00672	8.45834	-1.35762	0.410205	3.30961	0.000934254	0.0063202
AT2G19310	95.2125	73.736	105.42	45.3077	23.7819	31.9537	-1.35728	0.254612	5.3308	9.77818e-08	1.63049e-06
AT2G42920	38.7591	44.4193	46.0014	15.8577	8.76177	19.7361	-1.35598	0.335	4.04769	5.17246e-05	0.0005022
AT1G66190	13.4814	23.9864	15.3338	4.53077	7.51009	3.75926	-1.35198	0.450323	3.00224	0.00268001	0.0153827
AT1G30860	11.7962	14.2142	13.4171	4.53077	2.50336	3.75926	-1.35154	0.504417	2.67942	0.007375	0.0346479
AT3G51830	170.203	159.021	179.214	66.8288	61.3324	64.8473	-1.34963	0.182988	7.37551	1.63712e-13	5.6608e-12
AT1G75295	37.0739	39.089	36.4178	13.5923	8.76177	16.9167	-1.34846	0.336594	4.0062	6.17042e-05	0.00058573
AT3G44580	8.42588	8.88386	7.66691	1.13269	2.50336	2.81945	-1.34708	0.536284	2.51189	0.0120088	0.0512442
AT5G13090	27.8054	14.2142	14.3754	4.53077	5.00672	7.51853	-1.34561	0.417332	3.22431	0.00126279	0.00818306
AT3G23110	37.9165	61.2986	34.5011	18.1231	10.0134	18.7963	-1.34514	0.350657	3.83607	0.000125019	0.00109584
AT5G52780	129.759	123.486	157.172	53.2365	43.8088	57.3288	-1.34505	0.211576	6.35732	2.05303e-10	4.91215e-09
AT5G23980	28.648	31.0935	12.4587	9.06153	8.76177	5.6389	-1.34394	0.46127	2.91357	0.00357327	0.0192927
AT3G43790	27.8054	37.3122	29.7093	11.3269	12.5168	9.39816	-1.34135	0.388848	3.44955	0.000561526	0.00409223
AT2G29065	26.9628	24.8748	27.7925	9.06153	10.0134	8.45834	-1.34095	0.378536	3.54245	0.000396429	0.00303895
AT4G15765	11.7962	13.3258	15.3338	5.66346	3.75504	2.81945	-1.33866	0.458463	2.91988	0.00350169	0.0189693
AT2G35470	68.2497	95.0573	97.7531	30.5827	32.5437	32.8936	-1.33739	0.280886	4.76131	1.92336e-06	2.50523e-05
AT4G22980	23.5925	27.54	13.4171	5.66346	6.2584	9.39816	-1.3371	0.393288	3.39981	0.000674336	0.00476989
AT2G23690	4.21294	8.88386	13.4171	2.26538	1.25168	2.81945	-1.33656	0.528955	2.52679	0.0115111	0.0496518
AT3G53360	14.324	14.2142	23.9591	4.53077	5.00672	5.6389	-1.33652	0.495965	2.69479	0.00704325	0.0334238
AT2G33830	3714.13	4010.17	6166.11	1087.38	1759.86	2043.16	-1.33648	0.390048	3.42644	0.000611546	0.00440209
AT1G12220	37.9165	42.6425	48.8765	12.4596	8.76177	24.4352	-1.33519	0.289054	4.61916	3.85305e-06	4.72726e-05
AT1G08900	128.916	143.03	124.587	54.3692	41.3055	51.6899	-1.33504	0.276773	4.8236	1.40989e-06	1.88167e-05
AT4G24780	414.553	473.51	328.719	154.046	128.923	173.866	-1.33409	0.24776	5.38461	7.26032e-08	1.23204e-06
AT1G27690	83.4162	70.1825	97.7531	24.9192	28.7887	39.4723	-1.33343	0.255821	5.21235	1.86463e-07	2.95751e-06
AT4G10910	6.74071	10.6606	14.3754	5.66346	1.25168	1.87963	-1.33315	0.507257	2.62816	0.00858472	0.0391668
AT4G29700	113.749	76.4012	55.5851	29.45	26.2853	33.8334	-1.33277	0.319494	4.1715	3.02595e-05	0.000305735
AT1G72820	77.5181	104.83	120.754	36.2461	33.7954	42.2917	-1.3323	0.268509	4.96186	6.98198e-07	9.92654e-06
AT4G27740	42.1294	31.0935	40.2513	13.5923	13.7685	13.1574	-1.33172	0.361455	3.68434	0.000229298	0.00188718
AT5G10946	36.2313	37.3122	23.9591	13.5923	11.2651	10.338	-1.33027	0.334613	3.97554	7.02196e-05	0.000659933
AT3G53490	27.8054	23.098	22.0424	10.1942	7.51009	7.51853	-1.32804	0.393908	3.37144	0.000747768	0.00522079
AT4G31060	26.9628	23.9864	42.168	10.1942	10.0134	12.2176	-1.31992	0.388419	3.39818	0.000678358	0.0047868
AT1G23060	11.7962	17.7677	12.4587	0	2.50336	9.39816	-1.31898	0.515647	2.5579	0.0105305	0.0461955
AT3G26890	210.647	222.985	215.632	81.5538	97.6311	77.0649	-1.3186	0.143575	9.18404	4.15207e-20	2.74987e-18
AT1G19960	200.536	100.388	94.878	29.45	23.7819	82.7038	-1.31813	0.425062	3.10104	0.00192845	0.0116874
AT4G16835	16.8518	14.2142	21.084	1.13269	2.50336	11.2778	-1.31648	0.492965	2.67053	0.0075732	0.0353745
AT3G60040	16.0092	8.88386	14.3754	1.13269	5.00672	4.69908	-1.31541	0.516497	2.54679	0.0108719	0.0473881
AT2G28460	19.3795	23.9864	25.8758	10.1942	5.00672	8.45834	-1.31461	0.406593	3.23323	0.00122401	0.00796905
AT5G59960	143.24	132.369	146.63	50.9711	63.8357	49.8102	-1.31391	0.20131	6.52681	6.71854e-11	1.70195e-09
AT3G63240	38.7591	58.6335	69.9605	20.3884	25.0336	17.8565	-1.31283	0.274607	4.78078	1.74618e-06	2.2914e-05
AT5G43700	208.962	242.529	273.134	75.8903	103.89	103.38	-1.31271	0.164865	7.96232	1.68839e-15	7.15561e-14
AT1G59620	72.4626	48.8612	53.6683	14.725	21.2786	28.1945	-1.31217	0.323623	4.05463	5.02144e-05	0.00048911
AT5G09460	298.276	284.283	315.302	89.4826	122.665	139.093	-1.31135	0.155873	8.41292	3.99938e-17	1.9928e-15
AT3G48580	19.3795	15.1026	18.2089	3.39807	7.51009	5.6389	-1.30901	0.490825	2.66696	0.00765398	0.0356988
AT4G33490	190.425	158.133	161.963	55.5019	72.5975	73.3056	-1.30618	0.176801	7.38789	1.49174e-13	5.18355e-12
AT1G19670	315.971	282.507	267.383	120.065	72.5975	120.296	-1.30584	0.358289	3.64466	0.00026775	0.00216984
AT2G39435	46.3424	38.2006	27.7925	9.06153	21.2786	12.2176	-1.30278	0.325587	4.00133	6.29873e-05	0.000597009
AT2G20250	24.4351	23.098	31.626	14.725	8.76177	5.6389	-1.30189	0.341497	3.81229	0.000137683	0.00119656
AT5G54080	101.953	127.039	99.6698	39.6442	41.3055	46.9908	-1.29693	0.214565	6.04447	1.49906e-09	3.20554e-08
AT4G38545	95.2125	79.9547	65.1687	22.6538	42.5572	27.2547	-1.29648	0.288814	4.48899	7.15611e-06	8.36213e-05
AT3G27580	22.7499	24.8748	23.9591	11.3269	8.76177	5.6389	-1.29601	0.386396	3.3541	0.000796237	0.00551002
AT1G29240	69.9348	50.638	35.4594	15.8577	13.7685	27.2547	-1.29479	0.349403	3.70572	0.000210788	0.00174846
AT2G15042	37.9165	44.4193	17.2505	11.3269	10.0134	15.0371	-1.29296	0.367737	3.51599	0.000438112	0.00331637
AT5G15770	21.0647	15.9909	24.9174	3.39807	10.0134	8.45834	-1.29291	0.403768	3.20212	0.00136422	0.00872071
AT4G01593	65.7219	55.0799	29.7093	15.8577	18.7752	21.6158	-1.29273	0.329547	3.92274	8.75488e-05	0.000802674
AT5G13060	53.0831	47.0844	46.0014	14.725	8.76177	29.1343	-1.29155	0.342661	3.76916	0.000163796	0.00140216
AT3G52490	38.7591	27.54	46.9598	10.1942	18.7752	12.2176	-1.2905	0.377472	3.41881	0.000628962	0.00450138
AT1G19340	32.0184	39.9774	36.4178	19.2558	11.2651	10.338	-1.28941	0.318967	4.04245	5.28958e-05	0.000511923
AT2G39300	17.6944	15.9909	21.084	3.39807	11.2651	3.75926	-1.28905	0.443521	2.90641	0.00365607	0.0196845
AT1G77360	7.5833	5.33032	12.4587	1.13269	5.00672	0.939816	-1.28843	0.513403	2.50959	0.012087	0.0515155
AT4G34139	21.0647	33.7587	16.2922	9.06153	3.75504	11.2778	-1.28815	0.401746	3.20638	0.00134416	0.00862379
AT2G36460	631.941	652.964	582.685	287.704	244.078	209.579	-1.28783	0.194392	6.62493	3.47405e-11	9.07248e-10
AT2G28940	41.2868	43.5309	45.0431	15.8577	8.76177	23.4954	-1.28694	0.30497	4.2199	2.44412e-05	0.000253247
AT3G26170	94.3699	38.2006	57.5018	24.9192	27.537	16.9167	-1.2866	0.39514	3.25607	0.00112965	0.00742335
AT1G09907	5.89812	7.10709	10.542	3.39807	1.25168	1.87963	-1.28651	0.52402	2.45508	0.0140851	0.0580525
AT4G35070	18.5369	19.5445	10.542	6.79615	3.75504	5.6389	-1.28646	0.432199	2.97654	0.00291518	0.0164325
AT3G18710	26.9628	32.8703	37.3762	13.5923	12.5168	10.338	-1.28589	0.31387	4.0969	4.18718e-05	0.00041299
AT5G23240	489.544	554.353	555.851	212.946	210.282	219.917	-1.28348	0.163793	7.83598	4.65209e-15	1.87209e-13
AT3G43700	42.972	29.3167	29.7093	12.4596	11.2651	14.0972	-1.28315	0.342585	3.7455	0.000180032	0.00152446
AT1G23080	654.691	662.736	612.394	237.865	272.866	265.028	-1.28094	0.153707	8.33365	7.83882e-17	3.78107e-15
AT1G72830	24.4351	11.549	17.2505	6.79615	2.50336	8.45834	-1.27988	0.432255	2.96095	0.00306694	0.0170649
AT3G49740	15.1666	20.4329	11.5004	3.39807	6.2584	6.57871	-1.27905	0.417644	3.06254	0.00219467	0.0130574
AT1G04000	15.1666	19.5445	28.7509	11.3269	1.25168	8.45834	-1.27832	0.39036	3.27472	0.00105768	0.00702695
AT3G62750	419.609	428.202	457.139	191.425	190.255	146.611	-1.27721	0.156517	8.1602	3.34464e-16	1.50026e-14
AT2G17036	10.9536	12.4374	14.3754	3.39807	5.00672	3.75926	-1.27575	0.472298	2.70116	0.00690989	0.0329612
AT5G62170	24.4351	20.4329	16.2922	4.53077	3.75504	12.2176	-1.27559	0.401639	3.17596	0.00149343	0.0094184
AT5G39865	12.6388	13.3258	14.3754	1.13269	10.0134	1.87963	-1.27402	0.493154	2.58342	0.00978254	0.0435302
AT1G65070	89.3144	95.0573	92.9612	30.5827	42.5572	36.6528	-1.27358	0.231935	5.4911	3.99429e-08	7.02642e-07
AT1G05950	34.5461	35.5354	30.6676	12.4596	7.51009	16.9167	-1.2724	0.344773	3.69053	0.00022379	0.00184615
AT5G45660	22.7499	26.6516	21.084	6.79615	5.00672	12.2176	-1.27186	0.43334	2.93503	0.00333521	0.0182357
AT1G07490	10.1111	4.44193	10.542	3.39807	0	2.81945	-1.27106	0.519963	2.44452	0.0145047	0.0594337
AT1G63300	59.8238	68.4057	89.1278	23.7865	22.5303	37.5926	-1.27053	0.263074	4.82953	1.36854e-06	1.83698e-05
AT1G27300	56.4534	47.9728	68.0438	14.725	30.0403	21.6158	-1.26995	0.300572	4.22511	2.38824e-05	0.000248065
AT1G08250	69.9348	57.7451	60.3769	33.9807	11.2651	26.3148	-1.26961	0.286391	4.43313	9.28749e-06	0.000105786
AT1G01240	142.397	135.035	142.796	66.8288	50.0672	50.7501	-1.26876	0.227056	5.58788	2.29856e-08	4.17914e-07
AT4G14540	19.3795	25.7632	6.70854	5.66346	5.00672	4.69908	-1.26657	0.507801	2.49422	0.0126234	0.0532731
AT1G07640	84.2588	81.7315	102.545	30.5827	31.292	44.1713	-1.26376	0.213888	5.9085	3.45247e-09	7.01349e-08
AT2G02765	29.4906	23.9864	33.5427	9.06153	15.0202	9.39816	-1.26251	0.33673	3.74934	0.000177302	0.00150315
AT3G20080	46.3424	50.638	50.7933	20.3884	12.5168	23.4954	-1.26078	0.294709	4.27804	1.88543e-05	0.000201281
AT3G10250	88.4718	63.9638	76.6691	27.1846	43.8088	21.6158	-1.26039	0.249864	5.04432	4.55139e-07	6.66832e-06
AT4G02825	71.62	39.9774	49.8349	20.3884	15.0202	20.6759	-1.25976	0.444086	2.83676	0.00455741	0.0234383
AT3G11410	347.989	305.605	312.426	111.004	123.916	141.912	-1.25831	0.290804	4.32699	1.51164e-05	0.00016479
AT3G18000	342.091	334.921	509.849	131.392	178.99	171.986	-1.2582	0.172117	7.31013	2.66884e-13	9.00711e-12
AT4G01595	64.8793	55.0799	27.7925	15.8577	18.7752	21.6158	-1.25793	0.343345	3.66376	0.000248541	0.0020321
AT3G14610	16.8518	18.6561	20.1256	4.53077	10.0134	5.6389	-1.25656	0.401109	3.13272	0.00173196	0.0106462
AT5G39030	70.7774	55.9683	52.71	20.3884	28.7887	22.5556	-1.25554	0.262743	4.77859	1.76528e-06	2.31502e-05
AT3G28080	117.12	114.602	115.962	48.7057	35.0471	54.5093	-1.25458	0.234569	5.34845	8.87114e-08	1.48847e-06
AT1G07040	112.064	87.9502	96.7947	28.3173	43.8088	46.051	-1.25382	0.260183	4.81899	1.44287e-06	1.92325e-05
AT1G80960	31.1758	27.54	46.0014	10.1942	17.5235	12.2176	-1.25341	0.336853	3.72095	0.000198475	0.00166265
AT1G18485	43.8146	47.9728	52.71	13.5923	21.2786	20.6759	-1.2532	0.312286	4.01299	5.99545e-05	0.000571855
AT2G03310	131.444	106.606	111.17	49.8384	55.074	36.6528	-1.2532	0.246367	5.0867	3.64343e-07	5.45148e-06
AT1G55310	85.1014	82.6199	97.7531	35.1134	38.8021	33.8334	-1.25092	0.215156	5.81404	6.09824e-09	1.19405e-07
AT3G59680	14.324	11.549	12.4587	1.13269	8.76177	2.81945	-1.24985	0.479237	2.60801	0.0091071	0.0411475
AT4G37080	307.545	352.689	329.677	130.259	136.433	140.033	-1.24853	0.147368	8.47217	2.40858e-17	1.25645e-15
AT4G19865	25.2777	14.2142	21.084	5.66346	11.2651	5.6389	-1.24832	0.398107	3.13565	0.00171476	0.0105713
AT4G39530	13.4814	11.549	12.4587	4.53077	3.75504	3.75926	-1.24757	0.4576	2.72634	0.00640402	0.0310245
AT1G58180	132.286	110.16	138.963	33.9807	63.8357	54.5093	-1.24552	0.262512	4.74464	2.08879e-06	2.70072e-05
AT5G07152	32.8609	34.647	27.7925	9.06153	13.7685	14.0972	-1.24545	0.319039	3.90375	9.47119e-05	0.00085842
AT3G04380	16.0092	24.8748	37.3762	3.39807	6.2584	16.9167	-1.24539	0.446251	2.79078	0.00525804	0.0264618
AT3G06868	124.703	119.932	113.087	38.5115	53.8223	52.6297	-1.24377	0.21459	5.79603	6.79048e-09	1.31859e-07
AT3G56360	18.5369	27.54	56.5434	9.06153	10.0134	13.1574	-1.2436	0.487156	2.55277	0.0106871	0.0467078
AT4G24810	62.3515	87.0618	92.0029	40.7769	25.0336	31.0139	-1.24297	0.241117	5.15503	2.53588e-07	3.92783e-06
AT1G75960	35.3887	41.7541	38.3345	7.92884	27.537	8.45834	-1.24046	0.397431	3.1212	0.00180115	0.0110247
AT4G30500	10.1111	24.8748	22.0424	7.92884	2.50336	9.39816	-1.24044	0.435358	2.84923	0.00438245	0.0227154
AT4G24660	48.8701	50.638	44.0847	12.4596	17.5235	25.375	-1.23841	0.295583	4.18971	2.79308e-05	0.000285345
AT2G38695	14.324	14.2142	15.3338	7.92884	3.75504	3.75926	-1.2375	0.427296	2.89612	0.00377809	0.0202024
AT4G29890	69.0922	66.6289	70.9189	28.3173	30.0403	26.3148	-1.23668	0.234613	5.27115	1.35569e-07	2.19592e-06
AT2G45380	189.582	162.575	135.129	55.5019	75.1009	67.6667	-1.23659	0.239712	5.15863	2.48763e-07	3.85876e-06
AT4G16710	62.3515	63.9638	50.7933	23.7865	23.7819	23.4954	-1.23647	0.276879	4.46575	7.97906e-06	9.23691e-05
AT5G64340	235.925	207.882	226.174	91.748	73.8492	109.958	-1.2347	0.149666	8.24971	1.58779e-16	7.47111e-15
AT3G19000	78.3607	97.7224	87.2111	38.5115	30.0403	37.5926	-1.23397	0.249382	4.94813	7.49301e-07	1.06174e-05
AT2G04690	146.61	122.597	115.962	56.6346	43.8088	56.389	-1.23359	0.215386	5.72734	1.02016e-08	1.933e-07
AT1G64580	20.2221	27.54	17.2505	12.4596	5.00672	6.57871	-1.23331	0.384035	3.21144	0.00132072	0.00849403
AT3G03180	29.4906	30.2051	23.0007	6.79615	6.2584	16.9167	-1.23238	0.37885	3.25294	0.00114217	0.00750098
AT3G60110	16.0092	30.2051	23.9591	4.53077	12.5168	9.39816	-1.23085	0.372852	3.30118	0.000962793	0.00648833
AT5G03960	21.0647	25.7632	32.5844	7.92884	6.2584	15.0371	-1.23061	0.423218	2.90775	0.00364035	0.0196048
AT2G44850	31.1758	23.9864	23.9591	9.06153	10.0134	10.338	-1.23048	0.398146	3.09053	0.00199799	0.0120605
AT3G26220	17.6944	15.1026	12.4587	4.53077	1.25168	8.45834	-1.23003	0.492542	2.49732	0.0125136	0.0529232
AT5G16410	6.74071	11.549	11.5004	0	7.51009	1.87963	-1.22962	0.480636	2.55831	0.0105181	0.0461507
AT2G40020	32.8609	55.0799	43.1263	18.1231	20.0269	13.1574	-1.22932	0.32993	3.72599	0.000194551	0.0016343
AT3G23150	26.9628	17.7677	21.084	4.53077	5.00672	14.0972	-1.2293	0.397862	3.08977	0.00200314	0.0120846
AT2G40435	35.3887	26.6516	38.3345	19.2558	11.2651	5.6389	-1.22897	0.429036	2.86449	0.00417675	0.0218205
AT3G50500	723.783	773.784	779.149	295.632	331.695	322.357	-1.2287	0.155578	7.89766	2.84195e-15	1.17041e-13
AT2G44230	211.49	224.762	215.632	112.136	100.134	60.1482	-1.22807	0.180913	6.78819	1.13548e-11	3.1034e-10
AT4G14120	21.0647	21.3213	90.0861	12.4596	27.537	7.51853	-1.22804	0.458505	2.67837	0.00739822	0.0347415
AT5G23460	21.9073	12.4374	15.3338	6.79615	8.76177	2.81945	-1.2279	0.41533	2.95644	0.00311209	0.0172299
AT3G18800	23.5925	13.3258	14.3754	5.66346	5.00672	7.51853	-1.22681	0.413485	2.96699	0.00300732	0.0168172
AT3G07500	10.9536	13.3258	11.5004	4.53077	1.25168	5.6389	-1.2257	0.473217	2.59015	0.00959351	0.0428685
AT3G15115	17.6944	17.7677	31.626	9.06153	8.76177	6.57871	-1.2247	0.405062	3.02348	0.00249887	0.0145514
AT1G69530	499.655	620.093	292.301	150.648	194.011	217.097	-1.22301	0.303952	4.0237	5.72913e-05	0.000549679
AT2G09400	25.2777	22.2096	21.084	10.1942	10.0134	6.57871	-1.22217	0.380261	3.21402	0.00130892	0.00843097
AT5G27950	251.934	251.413	253.008	90.6153	125.168	98.6807	-1.22046	0.207545	5.88047	4.09112e-09	8.24744e-08
AT5G18650	245.193	261.185	297.093	111.004	113.903	111.838	-1.21995	0.15177	8.03815	9.12024e-16	3.97285e-14
AT3G02340	58.9812	58.6335	51.7516	16.9904	28.7887	22.5556	-1.21824	0.296508	4.10863	3.98009e-05	0.000394221
AT4G03820	29.4906	23.9864	25.8758	6.79615	12.5168	9.39816	-1.21476	0.44841	2.70903	0.00674806	0.0323353
[truncated: 5,327 more rows]
