# Supplementary material for: Identification of small RNAs during cold acclimation in Arabidopsis thaliana
Source: BMC Plant Biol. 2020 Jun 29;20:298. doi: 10.1186/s12870-020-02511-3 (PMC7325139; doi:10.1186/s12870-020-02511-3)
Supplement: Supplementary file 6 — Additional file 6 Table S12: Gene Ontology term enrichment analysis for predicted targets of differentially expressed miRNAs. The sub-tables depict GO terms after 3 h, 6 h and 2 d of cold acclimation. [file 12870_2020_2511_MOESM6_ESM.xlsx]

## Sheet: Table S12.
Table S12: Gene Ontology term enrichment analysis for predicted targets of differentially expressed miRNAs. The sub-tables depict GO terms after 3 h, 6 h and 2 d of cold acclimation.
3 h time point
Category	Term	Count	%	PValue	Genes	List Total	Pop Hits	Pop Total	Fold Enrichment	Bonferroni	Benjamini	FDR
GOTERM_BP_DIRECT	GO:0006355~regulation of transcription, DNA-templated	47	49.4737	4.13468e-22	AT4G26930, AT5G12840, AT3G51910, AT1G53160, AT4G27330, AT2G34010, AT1G69170, AT2G26950, AT5G60120, AT5G67180, AT2G32460, AT3G15270, AT5G06510, AT3G05690, AT3G06250, AT5G50570, AT3G14020, AT5G06100, AT3G60460, AT1G77850, AT1G27370, AT3G23690, AT3G15030, AT2G28350, AT1G72830, AT4G30080, AT1G30490, AT5G50670, AT2G28550, AT4G36920, AT2G31070, AT5G43270, AT2G40220, AT5G65790, AT2G34710, AT1G27360, AT3…	85	2119	18499	4.82721	6.82222e-20	6.82222e-20	5.01881e-19
GOTERM_BP_DIRECT	GO:0006351~transcription, DNA-templated	41	43.1579	2.19483e-18	AT3G51910, AT5G12840, AT1G53160, AT4G27330, AT1G69170, AT2G34010, AT2G26950, AT5G60120, AT5G67180, AT3G15270, AT5G06510, AT3G05690, AT5G50570, AT3G14020, AT5G06100, AT1G77850, AT1G27370, AT3G23690, AT3G15030, AT2G28350, AT1G72830, AT4G30080, AT1G30490, AT5G50670, AT2G28550, AT4G36920, AT2G31070, AT5G43270, AT2G40220, AT2G34710, AT1G27360, AT3G54990, AT2G33810, AT3G20910, AT1G17590, AT3G57920, AT4…	85	1886	18499	4.7312	3.62146e-16	1.81073e-16	2.66415e-15
GOTERM_BP_DIRECT	GO:0048653~anther development	6	6.31579	1.04431e-07	AT5G43270, AT5G50570, AT4G27330, AT3G57920, AT5G50670, AT2G42200	85	26	18499	50.2235	1.72309e-05	4.30776e-06	0.000126761
GOTERM_BP_DIRECT	GO:0030154~cell differentiation	12	12.6316	9.63449e-08	AT4G36920, AT2G32460, AT4G26930, AT3G15030, AT2G31070, AT5G65790, AT2G34710, AT2G33810, AT4G18390, AT2G26950, AT1G30490, AT1G30210	85	296	18499	8.82305	1.58968e-05	5.29896e-06	0.000116947
GOTERM_BP_DIRECT	GO:0045962~positive regulation of development, heterochronic	4	4.21053	4.97558e-06	AT3G15030, AT2G31070, AT4G18390, AT1G30210	85	8	18499	108.818	0.000820636	0.000164181	0.00603935
GOTERM_BP_DIRECT	GO:0010262~somatic embryogenesis	4	4.21053	1.05921e-05	AT5G12840, AT3G14020, AT3G20910, AT1G54160	85	10	18499	87.0541	0.00174618	0.000291242	0.0128563
GOTERM_BP_DIRECT	GO:0048316~seed development	6	6.31579	1.42523e-05	AT4G36920, AT5G12840, AT2G40220, AT3G14020, AT3G20910, AT1G54160	85	68	18499	19.2031	0.00234888	0.000335893	0.0172985
GOTERM_BP_DIRECT	GO:0048366~leaf development	7	7.36842	2.22961e-05	AT3G15030, AT2G31070, AT2G28350, AT2G34010, AT4G18390, AT2G42200, AT1G30210	85	125	18499	12.1876	0.00367214	0.000459757	0.0270604
GOTERM_BP_DIRECT	GO:0010152~pollen maturation	4	4.21053	5.86578e-05	AT3G26810, AT4G03190, AT3G62980, AT1G12820	85	17	18499	51.2083	0.00963214	0.00107485	0.0711775
GOTERM_BP_DIRECT	GO:0009873~ethylene-activated signaling pathway	7	7.36842	0.000164243	AT5G67180, AT2G40220, AT3G62980, AT3G54990, AT2G28550, AT2G39250, AT5G60120	85	179	18499	8.51088	0.0267383	0.00246081	0.199181
GOTERM_BP_DIRECT	GO:0048443~stamen development	4	4.21053	0.000149792	AT3G26810, AT4G03190, AT3G62980, AT1G12820	85	23	18499	37.8496	0.0244145	0.0024687	0.181671
GOTERM_BP_DIRECT	GO:0010321~regulation of vegetative phase change	3	3.15789	0.000201943	AT3G15270, AT1G53160, AT2G33810	85	5	18499	130.581	0.0327749	0.00277315	0.24485
GOTERM_BP_DIRECT	GO:0009734~auxin-activated signaling pathway	7	7.36842	0.000226905	AT3G26810, AT4G03190, AT2G28350, AT3G62980, AT4G30080, AT1G12820, AT1G77850	85	190	18499	8.01814	0.0367512	0.00287613	0.275076
GOTERM_BP_DIRECT	GO:0006357~regulation of transcription from RNA polymerase II promoter	7	7.36842	0.000418255	AT2G32460, AT4G26930, AT5G06100, AT5G65790, AT3G60460, AT2G26950, AT5G55020	85	213	18499	7.15233	0.066698	0.00491833	0.50651
GOTERM_BP_DIRECT	GO:0048510~regulation of timing of transition from vegetative to reproductive phase	4	4.21053	0.000679326	AT5G12840, AT5G43270, AT1G27360, AT1G27370	85	38	18499	22.909	0.106069	0.00744726	0.821475
GOTERM_BP_DIRECT	GO:0009965~leaf morphogenesis	4	4.21053	0.00232775	AT3G15030, AT2G31070, AT4G18390, AT1G30210	85	58	18499	15.0093	0.319227	0.0237464	2.78916
Category	Term	Count	%	PValue	Genes	List Total	Pop Hits	Pop Total	Fold Enrichment	Bonferroni	Benjamini	FDR
GOTERM_CC_DIRECT	GO:0016602~CCAAT-binding factor complex	8	8.42105	4.36323e-14	AT5G06510, AT5G12840, AT3G05690, AT3G14020, AT1G72830, AT3G20910, AT1G17590, AT1G54160	93	15	25147	144.212	1.57074e-12	1.57074e-12	3.89133e-11
GOTERM_CC_DIRECT	GO:0005634~nucleus	63	66.3158	3.065e-08	AT3G26810, AT4G03190, AT5G12840, AT1G27340, AT4G27330, AT2G34010, AT1G55660, AT5G67180, AT5G06120, AT3G06250, AT3G14020, AT1G77850, AT3G15030, AT2G28350, AT4G24270, AT1G30490, AT5G50670, AT2G28550, AT2G31070, AT5G43270, AT2G40220, AT5G65790, AT1G27360, AT3G54990, AT3G20910, AT1G30210, AT2G39250, AT4G03250, AT4G26930, AT3G51910, AT1G53160, AT3G44580, AT5G44980, AT1G69170, AT5G60760, AT2G26950, AT5…	93	9796	25147	1.73898	1.1034e-06	5.517e-07	2.73376e-05
GOTERM_CC_DIRECT	GO:0019005~SCF ubiquitin ligase complex	6	6.31579	0.000928828	AT3G26810, AT4G03190, AT1G27340, AT3G62980, AT1G32140, AT1G12820	93	204	25147	7.95288	0.0329	0.0110892	0.825407
Category	Term	Count	%	PValue	Genes	List Total	Pop Hits	Pop Total	Fold Enrichment	Bonferroni	Benjamini	FDR
GOTERM_MF_DIRECT	GO:0003700~transcription factor activity, sequence-specific DNA binding	46	48.4211	1.58609e-25	AT4G26930, AT5G12840, AT3G51910, AT1G53160, AT4G27330, AT1G69170, AT2G26950, AT5G55020, AT5G60120, AT5G67180, AT2G32460, AT3G15270, AT5G06510, AT3G05690, AT5G50570, AT3G14020, AT5G06100, AT3G60460, AT1G77850, AT1G27370, AT3G23690, AT3G15030, AT2G28350, AT1G72830, AT4G30080, AT1G30490, AT5G50670, AT2G28550, AT4G36920, AT2G31070, AT5G43270, AT2G40220, AT5G65790, AT2G34710, AT1G27360, AT3G54990, AT2…	82	1711	18171	5.95762	1.07854e-23	1.07854e-23	1.63173e-22
GOTERM_MF_DIRECT	GO:0003677~DNA binding	44	46.3158	2.40754e-20	AT4G26930, AT5G12840, AT3G51910, AT1G53160, AT1G69170, AT2G26950, AT5G55020, AT5G60120, AT5G67180, AT2G32460, AT3G15270, AT5G06510, AT3G05690, AT5G50570, AT3G14020, AT5G06100, AT3G60460, AT1G27370, AT3G23690, AT3G15030, AT2G28350, AT1G72830, AT4G30080, AT1G30490, AT5G50670, AT2G28550, AT4G36920, AT2G31070, AT5G43270, AT2G40220, AT5G65790, AT2G34710, AT1G27360, AT3G54990, AT2G33810, AT3G20910, AT1…	82	2047	18171	4.76321	1.63713e-18	8.18565e-19	2.47682e-17
GOTERM_MF_DIRECT	GO:0000822~inositol hexakisphosphate binding	4	4.21053	4.70245e-06	AT3G26810, AT4G03190, AT3G62980, AT1G12820	82	8	18171	110.799	0.000319716	0.000106583	0.00483765
GOTERM_MF_DIRECT	GO:0010011~auxin binding	4	4.21053	4.70245e-06	AT3G26810, AT4G03190, AT3G62980, AT1G12820	82	8	18171	110.799	0.000319716	0.000106583	0.00483765
GOTERM_MF_DIRECT	GO:0044212~transcription regulatory region DNA binding	10	10.5263	1.21766e-05	AT2G32460, AT4G26930, AT2G40220, AT5G43270, AT5G06100, AT5G65790, AT3G60460, AT2G26950, AT5G55020, AT3G23690	82	319	18171	6.94663	0.000827671	0.000206982	0.0125262
GOTERM_MF_DIRECT	GO:0001135~transcription factor activity, RNA polymerase II transcription factor recruiting	7	7.36842	3.94818e-05	AT2G32460, AT4G26930, AT5G06100, AT5G65790, AT3G60460, AT2G26950, AT5G55020	82	141	18171	11.0013	0.00268122	0.000536819	0.0406104
GOTERM_MF_DIRECT	GO:0000981~RNA polymerase II transcription factor activity, sequence-specific DNA binding	7	7.36842	7.71321e-05	AT2G32460, AT4G26930, AT5G06100, AT5G65790, AT3G60460, AT2G26950, AT5G55020	82	159	18171	9.75587	0.00523145	0.000873815	0.0793229
GOTERM_MF_DIRECT	GO:0043565~sequence-specific DNA binding	10	10.5263	0.00309896	AT2G32460, AT4G26930, AT3G51910, AT2G40220, AT5G43270, AT5G06100, AT5G65790, AT3G60460, AT2G26950, AT5G55020	82	676	18171	3.27807	0.190272	0.029701	3.14264
6 h time point
Category	Term	Count	%	PValue	Genes	List Total	Pop Hits	Pop Total	Fold Enrichment	Bonferroni	Benjamini	FDR
GOTERM_BP_DIRECT	GO:0030154~cell differentiation	34	19.7674	8.50907e-30	AT1G34670, AT5G60910, AT4G26930, AT4G12350, AT3G61250, AT2G26950, AT1G79180, AT5G49330, AT2G32460, AT3G08500, AT5G60890, AT5G14340, AT4G22680, AT5G26660, AT4G05100, AT2G47460, AT3G62610, AT5G35550, AT3G15030, AT3G24310, AT2G26960, AT1G30490, AT3G49690, AT1G66230, AT5G23000, AT5G52260, AT2G31070, AT4G09460, AT1G06180, AT2G34710, AT2G33810, AT4G18390, AT1G30210, AT3G46130	137	296	18499	15.5101	1.91454e-27	1.91454e-27	1.08707e-26
GOTERM_BP_DIRECT	GO:0006357~regulation of transcription from RNA polymerase II promoter	30	17.4419	9.53628e-29	AT3G11440, AT1G34670, AT4G26930, AT4G12350, AT3G61250, AT2G26950, AT1G79180, AT5G55020, AT5G49330, AT2G32460, AT3G08500, AT5G60890, AT5G14340, AT4G22680, AT5G26660, AT5G06100, AT3G60460, AT4G05100, AT2G47460, AT3G62610, AT5G35550, AT3G24310, AT2G26960, AT3G49690, AT1G66230, AT5G23000, AT5G52260, AT4G09460, AT1G06180, AT3G46130	137	213	18499	19.0182	2.14566e-26	1.07283e-26	1.2183e-25
GOTERM_BP_DIRECT	GO:0006355~regulation of transcription, DNA-templated	62	36.0465	7.28268e-23	AT1G34670, AT5G60910, AT5G12840, AT4G27330, AT4G12350, AT2G34010, AT3G61250, AT1G79180, AT5G49330, AT3G06250, AT5G14340, AT3G14020, AT4G05100, AT1G64100, AT2G47460, AT3G62610, AT3G15030, AT1G30490, AT5G50670, AT3G49690, AT1G66230, AT5G23000, AT5G52260, AT2G31070, AT5G43270, AT4G09460, AT2G40220, AT1G06180, AT1G27360, AT3G20910, AT1G30210, AT3G46130, AT4G03250, AT5G18960, AT3G11440, AT4G26930, AT3…	137	2119	18499	3.95083	1.6386e-20	5.46201e-21	9.30393e-20
GOTERM_BP_DIRECT	GO:0006351~transcription, DNA-templated	44	25.5814	5.58113e-12	AT3G11440, AT5G60910, AT5G12840, AT3G51910, AT1G53160, AT4G27330, AT1G69170, AT2G34010, AT2G26950, AT3G58780, AT3G15270, AT5G06510, AT3G05690, AT5G60890, AT5G26660, AT5G50570, AT3G14020, AT5G06100, AT1G69770, AT2G47460, AT1G64100, AT1G27370, AT5G35550, AT3G15030, AT1G72830, AT1G30490, AT5G50670, AT3G49690, AT5G23000, AT2G31070, AT5G43270, AT4G09460, AT2G40220, AT2G34710, AT1G27360, AT2G33810, AT3…	137	1886	18499	3.1502	1.25575e-09	3.13936e-10	7.13007e-09
GOTERM_BP_DIRECT	GO:0045893~positive regulation of transcription, DNA-templated	12	6.97674	6.06561e-07	AT5G49330, AT3G11440, AT3G08500, AT2G32460, AT2G40220, AT5G60890, AT4G22680, AT5G06100, AT2G47460, AT1G79180, AT3G62610, AT1G27370	137	217	18499	7.46705	0.000136467	2.72949e-05	0.000774905
GOTERM_BP_DIRECT	GO:0048653~anther development	6	3.48837	1.15895e-06	AT5G43270, AT5G50570, AT4G27330, AT3G57920, AT5G50670, AT2G42200	137	26	18499	31.1606	0.000260729	4.34596e-05	0.00148059
GOTERM_BP_DIRECT	GO:2000652~regulation of secondary cell wall biogenesis	5	2.90698	4.74941e-06	AT3G08500, AT4G22680, AT4G12350, AT1G79180, AT1G66230	137	16	18499	42.1966	0.00106805	0.000152648	0.0060674
GOTERM_BP_DIRECT	GO:0045962~positive regulation of development, heterochronic	4	2.32558	2.11863e-05	AT3G15030, AT2G31070, AT4G18390, AT1G30210	137	8	18499	67.5146	0.00475563	0.000595695	0.0270631
GOTERM_BP_DIRECT	GO:0010262~somatic embryogenesis	4	2.32558	4.49118e-05	AT5G12840, AT3G14020, AT3G20910, AT1G54160	137	10	18499	54.0117	0.0100545	0.00112219	0.0573616
GOTERM_BP_DIRECT	GO:0009751~response to salicylic acid	8	4.65116	0.000149748	AT3G11440, AT1G34670, AT4G09460, AT1G06180, AT3G61250, AT1G79180, AT3G46130, AT3G49690	137	155	18499	6.96925	0.0331344	0.00336391	0.191141
GOTERM_BP_DIRECT	GO:0048510~regulation of timing of transition from vegetative to reproductive phase	5	2.90698	0.000169921	AT3G06500, AT5G12840, AT5G43270, AT1G27360, AT1G27370	137	38	18499	17.767	0.0375138	0.00346993	0.216865
GOTERM_BP_DIRECT	GO:0010321~regulation of vegetative phase change	3	1.74419	0.000528805	AT3G15270, AT1G53160, AT2G33810	137	5	18499	81.0175	0.112203	0.0098687	0.673471
GOTERM_BP_DIRECT	GO:0009696~salicylic acid metabolic process	3	1.74419	0.00109981	AT2G23560, AT2G23580, AT4G37150	137	7	18499	57.8697	0.219323	0.0188654	1.39599
GOTERM_BP_DIRECT	GO:0048316~seed development	5	2.90698	0.00158149	AT5G12840, AT2G40220, AT3G14020, AT3G20910, AT1G54160	137	68	18499	9.92862	0.299609	0.0251161	2.00171
GOTERM_BP_DIRECT	GO:0048366~leaf development	6	3.48837	0.00231211	AT3G15030, AT2G31070, AT2G34010, AT4G18390, AT2G42200, AT1G30210	137	125	18499	6.4814	0.405971	0.0341259	2.91394
GOTERM_BP_DIRECT	GO:0043068~positive regulation of programmed cell death	3	1.74419	0.00282542	AT3G11440, AT2G32460, AT5G06100	137	11	18499	36.8261	0.470921	0.0390075	3.55015
Category	Term	Count	%	PValue	Genes	List Total	Pop Hits	Pop Total	Fold Enrichment	Bonferroni	Benjamini	FDR
GOTERM_CC_DIRECT	GO:0016602~CCAAT-binding factor complex	8	4.65116	2.96022e-12	AT5G06510, AT5G12840, AT3G05690, AT3G14020, AT1G72830, AT3G20910, AT1G17590, AT1G54160	167	15	25147	80.3098	1.5097e-10	1.5097e-10	2.86368e-09
Category	Term	Count	%	PValue	Genes	List Total	Pop Hits	Pop Total	Fold Enrichment	Bonferroni	Benjamini	FDR
GOTERM_MF_DIRECT	GO:0001135~transcription factor activity, RNA polymerase II transcription factor recruiting	30	17.4419	4.06145e-34	AT3G11440, AT1G34670, AT4G26930, AT4G12350, AT3G61250, AT2G26950, AT1G79180, AT5G55020, AT5G49330, AT2G32460, AT3G08500, AT5G60890, AT5G14340, AT4G22680, AT5G26660, AT5G06100, AT3G60460, AT4G05100, AT2G47460, AT3G62610, AT5G35550, AT3G24310, AT2G26960, AT3G49690, AT1G66230, AT5G23000, AT5G52260, AT4G09460, AT1G06180, AT3G46130	136	141	18171	28.4277	4.71128e-32	4.71128e-32	4.63364e-31
GOTERM_MF_DIRECT	GO:0000981~RNA polymerase II transcription factor activity, sequence-specific DNA binding	30	17.4419	1.73116e-32	AT3G11440, AT1G34670, AT4G26930, AT4G12350, AT3G61250, AT2G26950, AT1G79180, AT5G55020, AT5G49330, AT2G32460, AT3G08500, AT5G60890, AT5G14340, AT4G22680, AT5G26660, AT5G06100, AT3G60460, AT4G05100, AT2G47460, AT3G62610, AT5G35550, AT3G24310, AT2G26960, AT3G49690, AT1G66230, AT5G23000, AT5G52260, AT4G09460, AT1G06180, AT3G46130	136	159	18171	25.2095	2.00815e-30	1.00407e-30	1.97505e-29
GOTERM_MF_DIRECT	GO:0044212~transcription regulatory region DNA binding	32	18.6047	5.1371e-26	AT3G11440, AT1G34670, AT4G26930, AT4G12350, AT3G61250, AT2G26950, AT1G79180, AT5G55020, AT5G49330, AT2G32460, AT3G08500, AT5G60890, AT5G14340, AT4G22680, AT5G26660, AT5G06100, AT3G60460, AT4G05100, AT2G47460, AT3G62610, AT5G35550, AT3G24310, AT2G26960, AT3G49690, AT1G66230, AT5G23000, AT5G52260, AT4G09460, AT2G40220, AT5G43270, AT1G06180, AT3G46130	136	319	18171	13.4029	5.95903e-24	1.98634e-24	5.86083e-23
GOTERM_MF_DIRECT	GO:0003700~transcription factor activity, sequence-specific DNA binding	60	34.8837	8.10453e-26	AT1G34670, AT5G60910, AT5G12840, AT4G27330, AT4G12350, AT3G61250, AT1G79180, AT5G49330, AT5G60890, AT5G14340, AT3G14020, AT4G05100, AT2G47460, AT3G62610, AT3G15030, AT1G30490, AT5G50670, AT3G49690, AT1G66230, AT5G23000, AT5G52260, AT2G31070, AT5G43270, AT4G09460, AT2G40220, AT1G06180, AT1G27360, AT3G20910, AT1G30210, AT3G46130, AT4G03250, AT3G11440, AT4G26930, AT3G51910, AT1G53160, AT1G69170, AT2…	136	1711	18171	4.68534	9.40125e-24	2.35031e-24	9.24632e-23
GOTERM_MF_DIRECT	GO:0003677~DNA binding	61	35.4651	1.22763e-22	AT1G34670, AT5G12840, AT3G61250, AT1G79180, AT5G49330, AT5G60890, AT5G14340, AT3G14020, AT1G69770, AT4G05100, AT1G64100, AT2G47460, AT3G62610, AT3G15030, AT1G30490, AT5G50670, AT3G49690, AT1G66230, AT5G23000, AT5G52260, AT2G31070, AT5G43270, AT4G09460, AT2G40220, AT1G06180, AT1G27360, AT3G20910, AT1G30210, AT3G46130, AT4G03250, AT3G11440, AT4G26930, AT3G51910, AT1G53160, AT1G69170, AT2G26950, AT5…	136	2047	18171	3.98155	1.42405e-20	2.8481e-21	1.40058e-19
GOTERM_MF_DIRECT	GO:0043565~sequence-specific DNA binding	33	19.186	2.18032e-17	AT3G11440, AT1G34670, AT4G26930, AT3G51910, AT4G12350, AT3G61250, AT2G26950, AT1G79180, AT5G55020, AT5G49330, AT2G32460, AT3G08500, AT4G22680, AT5G60890, AT5G14340, AT5G26660, AT5G06100, AT3G60460, AT4G05100, AT2G47460, AT3G62610, AT5G35550, AT3G24310, AT2G26960, AT3G49690, AT1G66230, AT5G23000, AT5G52260, AT4G09460, AT2G40220, AT5G43270, AT1G06180, AT3G46130	136	676	18171	6.5224	2.52917e-15	4.21529e-16	2.48749e-14
GOTERM_MF_DIRECT	GO:0008168~methyltransferase activity	8	4.65116	0.00017268	AT1G15125, AT5G37990, AT1G66720, AT5G38100, AT1G66700, AT5G38780, AT1G66690, AT3G44840	136	157	18171	6.80817	0.0198333	0.00285771	0.19683
GOTERM_MF_DIRECT	GO:0008757~S-adenosylmethionine-dependent methyltransferase activity	7	4.06977	0.000218153	AT1G15125, AT5G37990, AT1G66720, AT1G66700, AT5G38780, AT1G66690, AT3G44840	136	115	18171	8.1328	0.0249909	0.00315856	0.248604
GOTERM_MF_DIRECT	GO:0080031~methyl salicylate esterase activity	3	1.74419	0.000539927	AT2G23560, AT2G23580, AT4G37150	136	5	18171	80.1662	0.0607263	0.00693676	0.614265
GOTERM_MF_DIRECT	GO:0080030~methyl indole-3-acetate esterase activity	3	1.74419	0.00148982	AT2G23560, AT2G23610, AT4G37150	136	8	18171	50.1039	0.158819	0.0171461	1.68659
2 d time point
Category	Term	Count	%	PValue	Genes	List Total	Pop Hits	Pop Total	Fold Enrichment	Bonferroni	Benjamini	FDR
GOTERM_BP_DIRECT	GO:0006355~regulation of transcription, DNA-templated	89	33.4586	1.92196e-30	AT1G34670, AT3G53680, AT5G12840, AT4G27330, AT5G62430, AT4G12350, AT1G42990, AT2G34010, AT3G61250, AT1G79180, AT1G63100, AT2G38950, AT5G67180, AT4G34060, AT5G49330, AT5G14340, AT3G06250, AT3G14020, AT4G05100, AT2G47460, AT3G12977, AT1G77850, AT3G62610, AT2G45160, AT5G53950, AT4G00150, AT3G15030, AT2G28350, AT4G00050, AT1G56010, AT1G30490, AT5G50670, AT5G61430, AT3G49690, AT2G28550, AT1G66230, AT5…	207	2119	18499	3.7535	6.47701e-28	6.47701e-28	2.61383e-27
GOTERM_BP_DIRECT	GO:0030154~cell differentiation	39	14.6617	1.95715e-29	AT1G34670, AT4G26930, AT2G43445, AT3G60630, AT4G12350, AT3G61250, AT2G26950, AT1G79180, AT5G49330, AT3G08500, AT2G32460, AT4G22680, AT5G60890, AT5G14340, AT5G26660, AT4G05100, AT2G47460, AT3G62610, AT2G45160, AT4G00150, AT5G35550, AT3G15030, AT3G24310, AT2G26960, AT1G30490, AT3G49690, AT1G66230, AT4G36920, AT5G23000, AT5G52260, AT2G31070, AT4G09460, AT1G06180, AT5G65790, AT2G34710, AT2G33810, AT4…	207	296	18499	11.7747	6.59559e-27	3.29779e-27	2.66168e-26
GOTERM_BP_DIRECT	GO:0006357~regulation of transcription from RNA polymerase II promoter	32	12.0301	8.67202e-26	AT3G11440, AT1G34670, AT4G26930, AT2G43445, AT4G12350, AT3G61250, AT2G26950, AT1G79180, AT5G55020, AT5G49330, AT2G32460, AT3G08500, AT5G60890, AT5G14340, AT4G22680, AT5G26660, AT5G06100, AT3G60460, AT4G05100, AT2G47460, AT3G62610, AT5G35550, AT3G24310, AT2G26960, AT3G49690, AT1G66230, AT5G23000, AT5G52260, AT4G09460, AT1G06180, AT5G65790, AT3G46130	207	213	18499	13.4261	2.92247e-23	9.74156e-24	1.17938e-22
GOTERM_BP_DIRECT	GO:0006351~transcription, DNA-templated	68	25.5639	1.01202e-18	AT5G12840, AT4G27330, AT5G62430, AT1G42990, AT2G34010, AT1G63100, AT5G67180, AT4G34060, AT5G60890, AT3G14020, AT3G05380, AT2G47460, AT3G12977, AT1G77850, AT2G45160, AT4G00150, AT5G53950, AT3G15030, AT2G28350, AT4G00050, AT1G56010, AT5G39610, AT1G30490, AT5G50670, AT5G61430, AT3G49690, AT2G28550, AT5G23000, AT2G31070, AT5G43270, AT4G09460, AT1G27360, AT3G54990, AT3G20910, AT5G07680, AT1G30210, AT2…	207	1886	18499	3.22215	3.41052e-16	8.5263e-17	1.37633e-15
GOTERM_BP_DIRECT	GO:0009751~response to salicylic acid	12	4.51128	1.33535e-06	AT3G11440, AT1G34670, AT1G15520, AT1G79680, AT4G09460, AT1G06180, AT3G45860, AT5G65790, AT3G61250, AT1G79180, AT3G46130, AT3G49690	207	155	18499	6.91875	0.00044991	8.99983e-05	0.00181603
GOTERM_BP_DIRECT	GO:0048653~anther development	6	2.25564	8.86932e-06	AT5G43270, AT5G50570, AT4G27330, AT3G57920, AT5G50670, AT2G42200	207	26	18499	20.6232	0.00298451	0.000498038	0.0120614
GOTERM_BP_DIRECT	GO:0010072~primary shoot apical meristem specification	5	1.8797	1.8517e-05	AT5G53950, AT1G56010, AT2G34710, AT1G30490, AT3G15170	207	15	18499	29.789	0.00622087	0.000891074	0.0251799
GOTERM_BP_DIRECT	GO:2000652~regulation of secondary cell wall biogenesis	5	1.8797	2.44744e-05	AT3G08500, AT4G22680, AT4G12350, AT1G79180, AT1G66230	207	16	18499	27.9272	0.00821407	0.00103047	0.0332796
GOTERM_BP_DIRECT	GO:0045893~positive regulation of transcription, DNA-templated	12	4.51128	3.29914e-05	AT5G49330, AT3G11440, AT3G08500, AT2G32460, AT4G22680, AT5G60890, AT5G06100, AT2G47460, AT1G09340, AT1G79180, AT3G62610, AT1G27370	207	217	18499	4.94196	0.0110567	0.0012346	0.0448583
GOTERM_BP_DIRECT	GO:0048366~leaf development	9	3.38346	7.9695e-05	AT5G53950, AT3G15030, AT2G31070, AT2G28350, AT2G34010, AT4G18390, AT2G42200, AT1G30210, AT4G39400	207	125	18499	6.43443	0.0265008	0.00243868	0.108329
GOTERM_BP_DIRECT	GO:0045962~positive regulation of development, heterochronic	4	1.50376	7.31366e-05	AT3G15030, AT2G31070, AT4G18390, AT1G30210	207	8	18499	44.6836	0.0243467	0.00246176	0.0994186
GOTERM_BP_DIRECT	GO:0010262~somatic embryogenesis	4	1.50376	0.000154159	AT5G12840, AT3G14020, AT3G20910, AT1G54160	207	10	18499	35.7469	0.050629	0.00432027	0.20945
GOTERM_BP_DIRECT	GO:0043068~positive regulation of programmed cell death	4	1.50376	0.00021023	AT3G11440, AT2G32460, AT5G06100, AT5G39610	207	11	18499	32.4971	0.0684031	0.00543556	0.285531
GOTERM_BP_DIRECT	GO:0009793~embryo development ending in seed dormancy	15	5.6391	0.000652019	AT3G15030, AT5G12840, AT3G15170, AT4G24270, AT1G03910, AT1G20960, AT2G04842, AT1G11680, AT3G14020, AT3G60830, AT1G44900, AT3G20910, AT1G26830, AT1G54160, AT4G31770	207	459	18499	2.9205	0.197322	0.0155775	0.8831
GOTERM_BP_DIRECT	GO:0048510~regulation of timing of transition from vegetative to reproductive phase	5	1.8797	0.00081953	AT5G12840, AT5G43270, AT5G62430, AT1G27360, AT1G27370	207	38	18499	11.7588	0.241411	0.0182511	1.10881
GOTERM_BP_DIRECT	GO:0048316~seed development	6	2.25564	0.000962611	AT4G36920, AT5G12840, AT3G14020, AT3G20910, AT2G16500, AT1G54160	207	68	18499	7.88534	0.277152	0.0200804	1.30122
GOTERM_BP_DIRECT	GO:0010321~regulation of vegetative phase change	3	1.12782	0.0012071	AT3G15270, AT1G53160, AT2G33810	207	5	18499	53.6203	0.33438	0.023659	1.6292
GOTERM_BP_DIRECT	GO:0007275~multicellular organism development	13	4.88722	0.0012884	AT5G53950, AT5G67180, AT5G23000, AT1G56010, AT5G39610, AT3G54990, AT3G19270, AT5G07680, AT5G61430, AT3G49690, AT2G28550, AT2G39250, AT5G60120	207	384	18499	3.02545	0.352393	0.0238483	1.73805
GOTERM_BP_DIRECT	GO:0009753~response to jasmonic acid	8	3.00752	0.00184539	AT1G15520, AT4G09460, AT5G60890, AT1G06180, AT5G07010, AT4G05100, AT3G61250, AT1G79180	207	156	18499	4.58293	0.463383	0.0322307	2.48072
GOTERM_BP_DIRECT	GO:0009696~salicylic acid metabolic process	3	1.12782	0.00249788	AT2G23560, AT2G23580, AT4G37150	207	7	18499	38.3002	0.569513	0.0412663	3.34412
GOTERM_BP_DIRECT	GO:0032259~methylation	9	3.38346	0.00264214	AT1G15125, AT1G11680, AT1G66720, AT5G38100, AT1G66700, AT5G38780, AT1G66690, AT3G44840, AT4G00740	207	212	18499	3.79389	0.589992	0.0415675	3.53406
Category	Term	Count	%	PValue	Genes	List Total	Pop Hits	Pop Total	Fold Enrichment	Bonferroni	Benjamini	FDR
GOTERM_CC_DIRECT	GO:0016602~CCAAT-binding factor complex	8	3.00752	5.76933e-11	AT5G06510, AT5G12840, AT3G05690, AT3G14020, AT1G72830, AT3G20910, AT1G17590, AT1G54160	254	15	25147	52.8021	5.01932e-09	5.01932e-09	6.23526e-08
GOTERM_CC_DIRECT	GO:0005634~nucleus	136	51.1278	2.17491e-06	AT2G25130, AT3G53680, AT1G27340, AT5G62430, AT4G27330, AT4G12350, AT1G42990, AT1G76260, AT2G34010, AT1G55660, AT3G61250, AT1G79650, AT5G49330, AT5G60890, AT5G14340, AT3G14020, AT5G49850, AT4G05100, AT2G47460, AT3G05380, AT5G23480, AT3G62610, AT2G45160, AT4G00150, AT3G15030, AT1G56010, AT4G24270, AT5G50670, AT3G49690, AT5G23000, AT1G06180, AT1G22330, AT1G27360, AT3G54990, AT5G07680, AT3G46130, AT2…	254	9796	25147	1.37449	0.0001892	9.46043e-05	0.00235053
Category	Term	Count	%	PValue	Genes	List Total	Pop Hits	Pop Total	Fold Enrichment	Bonferroni	Benjamini	FDR
GOTERM_MF_DIRECT	GO:0003700~transcription factor activity, sequence-specific DNA binding	85	31.9549	6.52832e-30	AT1G34670, AT5G12840, AT4G27330, AT5G62430, AT4G12350, AT1G42990, AT3G61250, AT1G79180, AT1G63100, AT2G38950, AT5G67180, AT5G49330, AT5G14340, AT5G60890, AT3G14020, AT4G05100, AT3G05380, AT2G47460, AT1G77850, AT3G62610, AT2G45160, AT5G53950, AT4G00150, AT3G15030, AT2G28350, AT4G00050, AT1G56010, AT5G39610, AT1G30490, AT5G50670, AT5G61430, AT3G49690, AT2G28550, AT1G66230, AT5G23000, AT2G31070, AT5…	228	1711	18171	3.95925	1.13593e-27	5.67964e-28	7.9957e-27
GOTERM_MF_DIRECT	GO:0001135~transcription factor activity, RNA polymerase II transcription factor recruiting	32	12.0301	5.20739e-30	AT3G11440, AT1G34670, AT4G26930, AT2G43445, AT4G12350, AT3G61250, AT2G26950, AT1G79180, AT5G55020, AT5G49330, AT2G32460, AT3G08500, AT5G60890, AT5G14340, AT4G22680, AT5G26660, AT5G06100, AT3G60460, AT4G05100, AT2G47460, AT3G62610, AT5G35550, AT3G24310, AT2G26960, AT3G49690, AT1G66230, AT5G23000, AT5G52260, AT4G09460, AT1G06180, AT5G65790, AT3G46130	228	141	18171	18.0873	9.06085e-28	9.06085e-28	6.37786e-27
GOTERM_MF_DIRECT	GO:0000981~RNA polymerase II transcription factor activity, sequence-specific DNA binding	32	12.0301	2.73463e-28	AT3G11440, AT1G34670, AT4G26930, AT2G43445, AT4G12350, AT3G61250, AT2G26950, AT1G79180, AT5G55020, AT5G49330, AT2G32460, AT3G08500, AT5G60890, AT5G14340, AT4G22680, AT5G26660, AT5G06100, AT3G60460, AT4G05100, AT2G47460, AT3G62610, AT5G35550, AT3G24310, AT2G26960, AT3G49690, AT1G66230, AT5G23000, AT5G52260, AT4G09460, AT1G06180, AT5G65790, AT3G46130	228	159	18171	16.0397	4.75826e-26	1.58609e-26	3.3493e-25
GOTERM_MF_DIRECT	GO:0003677~DNA binding	84	31.5789	7.85841e-24	AT1G34670, AT3G53680, AT5G12840, AT5G62430, AT1G42990, AT3G61250, AT1G79180, AT5G67180, AT4G34060, AT5G49330, AT5G14340, AT5G60890, AT3G14020, AT4G05100, AT3G05380, AT2G47460, AT1G09340, AT5G23480, AT3G12977, AT3G62610, AT5G53950, AT3G15030, AT2G28350, AT4G00050, AT1G56010, AT1G30490, AT5G50670, AT5G61430, AT3G49690, AT2G28550, AT1G66230, AT5G23000, AT2G31070, AT5G52260, AT4G09460, AT5G43270, AT1…	228	2047	18171	3.27043	1.36736e-21	3.41841e-22	9.62476e-21
GOTERM_MF_DIRECT	GO:0044212~transcription regulatory region DNA binding	33	12.406	5.66085e-20	AT3G11440, AT1G34670, AT4G26930, AT2G43445, AT4G12350, AT3G61250, AT2G26950, AT1G79180, AT5G55020, AT5G49330, AT2G32460, AT3G08500, AT4G22680, AT5G60890, AT5G14340, AT5G26660, AT5G06100, AT3G60460, AT4G05100, AT2G47460, AT3G62610, AT5G35550, AT3G24310, AT2G26960, AT3G49690, AT1G66230, AT5G23000, AT5G52260, AT4G09460, AT5G43270, AT1G06180, AT5G65790, AT3G46130	228	319	18171	8.24456	9.84988e-18	1.96998e-18	6.93325e-17
GOTERM_MF_DIRECT	GO:0043565~sequence-specific DNA binding	41	15.4135	1.43588e-16	AT3G11440, AT1G34670, AT4G26930, AT2G43445, AT3G51910, AT3G60630, AT4G12350, AT1G42990, AT3G61250, AT2G26950, AT1G79180, AT1G63100, AT5G55020, AT5G49330, AT3G08500, AT2G32460, AT4G22680, AT5G60890, AT5G14340, AT5G26660, AT5G06100, AT3G60460, AT4G05100, AT1G68880, AT2G47460, AT3G62610, AT2G45160, AT4G00150, AT5G35550, AT3G24310, AT2G26960, AT5G39610, AT3G49690, AT1G66230, AT5G23000, AT5G52260, AT5…	228	676	18171	4.83372	1.93179e-14	3.21965e-15	1.33227e-13
GOTERM_MF_DIRECT	GO:0030246~carbohydrate binding	19	7.14286	2.79351e-09	AT5G38550, AT1G61230, AT1G52130, AT2G25980, AT1G52070, AT1G52060, AT1G52050, AT1G68560, AT1G52110, AT5G42120, AT1G33790, AT1G60110, AT5G03140, AT5G28520, AT5G49850, AT1G57570, AT5G38540, AT5G49870, AT3G08870	228	251	18171	6.03287	4.86071e-07	6.94388e-08	3.42142e-06
GOTERM_MF_DIRECT	GO:0008757~S-adenosylmethionine-dependent methyltransferase activity	8	3.00752	0.000605274	AT1G15125, AT5G37990, AT1G66720, AT1G66700, AT5G38780, AT1G66690, AT3G44840, AT4G00740	228	115	18171	5.54416	0.0999902	0.0130824	0.738805
GOTERM_MF_DIRECT	GO:0008168~methyltransferase activity	9	3.38346	0.000811981	AT1G15125, AT1G11680, AT5G37990, AT1G66720, AT5G38100, AT1G66700, AT5G38780, AT1G66690, AT3G44840	228	157	18171	4.56864	0.131808	0.015582	0.989964
GOTERM_MF_DIRECT	GO:0080031~methyl salicylate esterase activity	3	1.12782	0.00151569	AT2G23560, AT2G23580, AT4G37150	228	5	18171	47.8184	0.231973	0.0260478	1.84063
