# Supplementary material for: Identification of small RNAs during cold acclimation in Arabidopsis thaliana
Source: BMC Plant Biol. 2020 Jun 29;20:298. doi: 10.1186/s12870-020-02511-3 (PMC7325139; doi:10.1186/s12870-020-02511-3)
Supplement: Supplementary file 14 — Additional file 14 Table S18: Sequences of oligonucleotides used in this study to perform stem loop qRT-PCR. [file 12870_2020_2511_MOESM14_ESM.xlsx]

## Sheet: Table S18.
Table S18. Sequences of oligonucleotides used in this study to perform Stem loop qPCR
Primer name	Sequence	Ta (°C)
ath-miR162a-3p_cDNA	GTCGTATCCAGTGCAGGGTCCGAGGTATTCGCACTGGATACGACctggat
ath-miR162a-3p_F	TCGATAAACCTCTGCAGCGC	54
ath-miR3434-5p_cDNA	GTCGTATCCAGTGCAGGGTCCGAGGTATTCGCACTGGATACGACaataat
ath-miR3434-5p_F	ACTTGGCTGATTCTATGCGCC	54
AT1G10522-AT5G53905_cDNA	GTCGTATCCAGTGCAGGGTCCGAGGTATTCGCACTGGATACGACacctgt
AT1G10522-AT5G53905_F	GGTGGTCGCACGGCGG	58
lncRNA_AT5G04445_cDNA	GTCGTATCCAGTGCAGGGTCCGAGGTATTCGCACTGGATACGACcgcgag
lncRNA_AT5G04445_F	CCTGGTCGGGGTCAAGG	60
AT3G05870-AT3G05880_cDNA	GTCGTATCCAGTGCAGGGTCCGAGGTATTCGCACTGGATACGACaagtta
AT3G05870-AT3G05880_F	TGATGTTTCATGAGCGCGGC	58
Universal reverse	CCAGTGCAGGGTCCGAGGTAT
UBI1_AT4G36800_F	GTTGCTTGTTCCTAGCCCATCT	58
UBI1_AT4G36800_R	CATTTGAAAAGGGCACAATCTG
